# Supplementary material for: Exploring the Adenylation Domain Repertoire of Nonribosomal Peptide Synthetases Using an Ensemble of Sequence-Search Methods
Source: PLoS One. 2013 Jul 16;8(7):e65926. doi: 10.1371/journal.pone.0065926 (PMC3712989; doi:10.1371/journal.pone.0065926)
Supplement: File S8 — Alignment-free search for A-domain signatures in the proteome of Microcystis aeruginosa . (XLS) [file pone.0065926.s008.xls]

## Sheet: DTM_search_on_Mycrocystis
ID	fcµ0	fcµ1	fcµ2	fcµ3	fcµ4	fcµ5	fcµ6	fcµ7	fcµ8	fcµ9	fcµ10	fcµ11	fcµ12	fcµ13	fcµ14	fcµ15	fcµ16
gt;MAE38570 McyA protein	174	5914	3.3808	3.7588	1.0382	1.1986	0.92	0.91	0.8405	0.8157	0.7809	0.7485	0.7103	0.6536	0.5955	0.5324	0.4508
gt;MAE38610 McyE protein	206	5798	8.3245	6.3349	1.5643	1.4686	1.109	1.1544	1.1229	1.1716	1.1799	1.218	1.2302	1.2474	1.2566	1.2641	1.2691
gt;MAE60010 McnC protein	188	5070	6.905	5.7059	1.4659	1.4379	1.1029	1.1416	1.1138	1.1596	1.1705	1.2093	1.2271	1.244	1.2519	1.2588	1.2629
gt;MAE38560 McyB protein	142	5042	4.0103	3.3121	1.1888	1.2364	1.1147	1.1575	1.1503	1.1695	1.1741	1.1823	1.1848	1.1907	1.194	1.1969	1.1992
gt;MAE56590 non-ribosomal peptide synthetase/polyketide synthase hybrid enzyme	211	4884	8.556	6.8616	1.665	1.6107	1.1523	1.2019	1.1664	1.2139	1.2338	1.272	1.302	1.332	1.3545	1.3735	1.3928
gt;MAE60030 McnA protein	248	4782	7.0339	6.9468	1.4211	1.7162	0.9891	1.0514	0.854	0.8576	0.7765	0.7598	0.7058	0.6764	0.6446	0.5979	0.5541
gt;MAE38630 McyG protein	131	4718	3.1749	3.1741	1.0837	1.1303	1.0192	1.058	1.0449	1.0776	1.0772	1.1013	1.1041	1.1218	1.1232	1.1301	1.1287
gt;MAE56580 peptide synthetase	127	4588	2.2713	2.5498	0.941	1.1627	1.0612	1.1518	1.1576	1.2172	1.2398	1.2908	1.3176	1.3565	1.375	1.4016	1.4158
gt;MAE60020 McnB protein	174	4574	4.9118	5.2524	1.2985	1.4245	1.084	1.1454	1.1142	1.1543	1.1668	1.1959	1.2165	1.2395	1.2566	1.2773	1.2985
gt;MAE56500 amino acid adenylation participated protein like	120	4560	2.5897	2.8854	0.954	1.1759	1.0075	1.0638	1.0415	1.0527	1.0481	1.0506	1.0488	1.05	1.0496	1.0499	1.0498
gt;MAE38550 McyC protein	204	4496	7.7463	7.4782	1.6666	1.6956	1.1127	1.1288	1.0444	1.0512	1.0378	1.0389	1.036	1.0361	1.0355	1.0363	1.0358
gt;MAE56520 non-ribosomal peptide synthetase	167	4446	4.6711	4.743	1.1632	1.5056	1.0438	1.2031	1.1012	1.1833	1.1668	1.2187	1.2246	1.2611	1.2749	1.3084	1.3245
gt;MAE58410 O-succinylbenzoic acid-CoA ligase	131	4420	3.3296	3.2598	1.1168	1.1385	0.9921	1.001	0.9653	0.9741	0.9517	0.9583	0.9437	0.9451	0.9399	0.9392	0.937
gt;MAE60000 McnE protein	144	4404	3.9083	3.9923	1.1405	1.2622	1.0351	1.0836	1.0524	1.0682	1.0598	1.0671	1.0639	1.0683	1.0664	1.0689	1.0668
gt;MAE58850 long-chain-fatty-acid CoA ligase	221	4358	10.3276	8.3048	2.098	2.0768	1.2517	1.3156	1.1459	1.1966	1.1616	1.2049	1.2087	1.2413	1.2588	1.2859	1.3044
gt;MAE00100 AMP-dependent synthetase and ligase	130	4270	3.2119	3.1491	1.053	1.1725	1.0501	1.0968	1.0902	1.1098	1.1124	1.1201	1.1234	1.1293	1.1318	1.1338	1.1351
gt;MAE21160 AMP-dependent synthetase and ligase	131	4100	3.4672	3.4274	1.1178	1.1581	0.9986	1	0.9778	0.973	0.9681	0.9664	0.9646	0.964	0.9631	0.9625	0.9615
gt;MAE59220 acetyl-coenzyme A synthetase	271	4034	10.0786	8.26	1.6923	2.4208	0.9771	1.4689	0.8192	1.0796	0.7285	0.8617	0.644	0.703	0.5548	0.5761	0.4647
gt;MAE21140 AMP-dependent synthetase and ligase	77	3830	6.1685	4.6408	1.8708	1.6003	1.2079	1.136	1.0536	1.0358	1.0166	1.0141	1.0083	1.0091	1.0081	1.0084	1.0085
gt;MAE11030 transketolase-like protein	130	3944	3.581	3.3112	1.042	1.2108	0.9927	1.0398	1.0036	1.0115	1.0026	1.0054	1.0032	1.0046	1.003	1.0046	1.003
gt;MAE24200 hypothetical protein	221	4358	10.3276	8.3048	2.098	2.0768	1.2517	1.3156	1.1459	1.1966	1.1616	1.2049	1.2087	1.2413	1.2588	1.2859	1.3044
gt;MAE03330 hypothetical protein	140	3912	4.0546	4.3271	1.1354	1.3002	0.9947	1.0393	0.9749	0.98	0.9636	0.963	0.9576	0.9564	0.9548	0.9535	0.953
gt;MAE23180 UDP-N-acetylmuramoylalanyl-D-glutamyl-2 6-diaminopimelate--D-alanyl-D-alanine ligase	1167	13532	67.419	62.0191	14.5509	13.7624	5.5213	4.9723	2.554	2.1576	1.2338	0.9575	0.5588	0.4142	0.2313	0.1719	0.1023
gt;MAE23170 transposase	1429	13054	97.68	104.492	29.533	28.8827	13.5565	12.5562	7.6119	6.8683	4.8013	4.2571	3.1842	2.7512	2.1158	1.7636	1.3548
gt;MAE23160 hypothetical protein	1865	11374	154.324	147.631	50.9955	53.2728	27.4874	28.6431	17.5695	18.2805	12.3436	12.8157	9.2157	9.508	7.1452	7.3088	5.688
gt;MAE40750 hypothetical protein	933	8320	71.2022	62.8125	18.7387	16.8177	8.1419	7.0289	4.3123	3.6595	2.5573	2.1597	1.6044	1.33	1.0058	0.8092	0.5967
gt;MAE41410 putative capsule polysaccharide export protein precursor	569	6712	36.8791	35.0228	9.5654	8.6589	3.9931	3.6694	2.2274	2.0965	1.4732	1.3812	1.045	0.963	0.764	0.6784	0.5397
gt;MAE47570 P700 apoprotein subunit Ib	494	6506	27.5658	27.4511	6.508	6.0038	2.6986	2.4883	1.6096	1.5178	1.1989	1.1278	0.9661	0.8979	0.7882	0.7204	0.6367
gt;MAE40740 hypothetical protein	1095	5848	116.903	116.726	48.7507	49.2317	30.8096	30.0378	22.4878	21.513	17.7167	16.8185	14.6289	13.8461	12.4688	11.8144	10.8773
gt;MAE23190 hypothetical protein	670	4918	67.9456	58.8222	23.8006	22.2297	13.525	12.794	9.2838	8.8372	7.0306	6.7088	5.6522	5.3971	4.7197	4.5104	4.0472
gt;MAE24210 hydrophobic amino acid uptake ABC-transporter	461	4428	30.375	30.3137	8.2156	8.113	3.7657	3.5989	2.2632	2.1466	1.6403	1.5648	1.3427	1.2887	1.177	1.135	1.0713
gt;MAE23200 transposase	596	4424	56.4292	49.1802	19.3034	18.8997	11.5394	11.2223	8.3371	8.0441	6.6309	6.3619	5.5733	5.3373	4.8492	4.6399	4.3053
gt;MAE58790 unknown protein	523	4178	38.2017	34.7255	11.0566	10.6606	5.4071	5.2399	3.302	3.2213	2.3138	2.2406	1.7421	1.6741	1.3807	1.3283	1.1375
gt;MAE23150 phosphoribosylamine--glycine ligase	464	4122	45.7548	37.7944	15.1271	12.9348	8.2191	7.1418	5.5483	4.9584	4.2517	3.8916	3.5122	3.2737	3.0418	2.8741	2.7168
gt;MAE40730 hypothetical protein	182	3266	8.5468	7.3259	2.0892	2.0551	1.3499	1.3422	1.1715	1.1628	1.102	1.0948	1.0703	1.0649	1.0516	1.0517	1.0433
gt;MAE41420 aldo/keto reductase	580	3050	60.3204	59.1131	24.1056	25.0407	15.1712	15.3138	11.1432	11.0063	8.8881	8.6659	7.4597	7.2196	6.4707	6.2418	5.7473
gt;MAE11040 transketolase-like protein	254	2078	21.2016	17.4645	5.6733	5.0561	2.7308	2.4569	1.7485	1.6161	1.3513	1.291	1.1812	1.1541	1.1005	1.0922	1.0652
gt;MAE40720 hypothetical protein	256	1674	29.3502	25.9203	11.4676	10.7091	7.1288	6.7886	5.3758	5.1833	4.463	4.3258	3.9035	3.7942	3.52	3.4216	3.2313
gt;MAE47560 P700 apoprotein subunit Ia	289	1674	34.2979	32.3195	15.1541	13.9516	9.5858	8.7796	7.0537	6.499	5.649	5.2486	4.7587	4.4673	4.1512	3.929	3.7092
gt;MAE38600 McyD protein	1543	7528	171.612	178.317	78.7673	78.9755	52.2568	49.9383	39.0353	36.6714	31.113	29.1527	25.8899	24.3297	22.1998	20.9575	19.4722
gt;MAE27810 short-chain dehydrogenase/reductase	687	6746	47.1976	48.4205	14.5683	13.4717	7.101	6.3064	4.4065	3.9569	3.2162	2.9567	2.6129	2.4551	2.2702	2.1631	2.056
gt;MAE54670 WD-repeat protein	649	6220	45.5906	41.387	11.7086	10.7469	5.0841	4.5357	2.8029	2.4975	1.8055	1.6083	1.2781	1.1427	0.9477	0.8376	0.7046
gt;MAE40700 hypothetical protein	364	6014	21.3809	16.9964	4.4756	3.5393	1.8291	1.6018	1.1807	1.1025	0.955	0.906	0.8239	0.7766	0.7125	0.6633	0.6165
gt;MAE33400 serine/threonine protein kinase	817	5898	73.6904	66.255	23.1563	21.6708	11.6556	10.7666	7.0894	6.4923	4.8036	4.3972	3.5013	3.194	2.661	2.4241	2.0794
gt;MAE27820 amino acid adenylation	438	5494	24.4883	23.8942	5.5241	5.326	2.3112	2.2698	1.4652	1.4577	1.1753	1.1498	1.0144	0.9749	0.8946	0.8499	0.7827
gt;MAE22800 serine/threonine kinase	878	5428	81.2023	75.1571	27.7259	27.0099	15.015	14.4085	9.6446	9.1489	6.8179	6.42	5.1409	4.8175	4.0517	3.7828	3.2979
gt;MAE03420 ABC-transporter ATP-binding protein	287	5304	14.6393	12.0586	2.7841	2.3902	1.4063	1.3441	1.2115	1.2221	1.2178	1.2359	1.2491	1.2642	1.2776	1.2888	1.2992
gt;MAE01920 hypothetical protein	264	4870	15.0422	11.6726	3.2367	2.7162	1.5995	1.5128	1.2862	1.2841	1.2398	1.2553	1.2559	1.2791	1.2956	1.3157	1.3333
gt;MAE50530 unknown protein	771	4816	77.9191	73.3412	28.7772	26.4071	15.8014	14.1624	10.1686	9.0594	7.1639	6.3912	5.3539	4.8099	4.1745	3.7768	3.3621
gt;MAE28580 hypothetical protein	374	4798	23.3401	20.4419	5.6331	6.9068	2.9458	3.6665	1.9833	2.3105	1.4592	1.5816	1.1036	1.1282	0.8289	0.814	0.6167
gt;MAE40870 hypothetical protein	321	4776	22.9024	19.0142	6.1554	5.0009	2.8197	2.4372	1.8309	1.694	1.483	1.4371	1.3574	1.3453	1.3225	1.3225	1.3181
gt;MAE27870 short-chain dehydrogenase/reductase	695	4668	66.3124	62.3672	23.0327	21.7409	12.2727	11.241	7.6859	6.9588	5.2904	4.79	3.8989	3.547	3.0258	2.7786	2.4451
gt;MAE41400 transketolase, central region	282	4514	15.4724	11.0492	3.0913	2.7491	1.5312	1.4339	1.1126	1.0726	0.9586	0.9315	0.8738	0.8509	0.8128	0.7869	0.7471
gt;MAE12840 beta ketoacyl-acyl carrier protein synthase	863	4512	95.4053	93.752	40.2445	39.9607	25.5382	24.5963	18.5547	17.6743	14.5178	13.8178	11.9314	11.3869	10.1493	9.7182	8.8588
gt;MAE48190 putative branched-chain amino acid transport system substrate-binding protein	365	4494	22.6066	17.7271	4.5799	4.3727	2.0018	2.1018	1.3686	1.4508	1.1505	1.1897	1.0453	1.0509	0.9713	0.9639	0.9172
gt;MAE40690 hypothetical protein	333	4480	28.7773	21.3751	7.3186	5.4571	3.1181	2.4827	1.8618	1.6241	1.4245	1.3356	1.2666	1.2375	1.2171	1.2126	1.2115
gt;MAE43590 hypothetical protein	821	4460	86.1237	87.1025	36.2118	36.8504	23.4879	22.7427	17.3754	16.5287	13.8179	13.1087	11.5172	10.9575	9.9239	9.478	8.7612
gt;MAE46430 NAD-dependent epimerase/dehydratase	174	3736	6.951	6.6678	1.5967	1.6086	1.0906	1.1113	1.0274	1.049	1.0239	1.0455	1.0301	1.047	1.0385	1.0517	1.0465
gt;MAE45780 magnesium protoporphyrin IX chelatase subunit D	280	4422	16.3327	10.8601	2.7574	2.4431	1.3111	1.3212	1.0447	1.0428	0.9373	0.9218	0.8663	0.845	0.8124	0.7944	0.7674
gt;MAE12400 putative peptidase	906	4380	105.752	109.996	48.0774	48.7045	31.5847	30.6159	23.5369	22.4038	18.7774	17.7707	15.6483	14.8076	13.4388	12.7486	11.799
gt;MAE14480 CTP synthetase	257	4378	14.8034	10.8202	2.8613	2.5169	1.4736	1.428	1.2208	1.2286	1.1858	1.2009	1.1961	1.2092	1.2139	1.2262	1.2329
gt;MAE32760 transposase	220	4374	12.5851	9.0759	2.4907	2.0907	1.3358	1.2591	1.1207	1.1051	1.0773	1.076	1.0716	1.0722	1.0715	1.0722	1.0728
gt;MAE58770 hypothetical protein	429	4336	39.0108	33.6074	12.0713	10.2568	5.7697	4.8558	3.395	2.923	2.3255	2.069	1.7918	1.6521	1.5108	1.4361	1.359
gt;MAE17300 ABC-transporter ATP-binding protein	300	4312	13.139	13.8093	3.1091	3.3542	1.6617	1.6881	1.2623	1.2567	1.1249	1.1158	1.0658	1.0571	1.0332	1.0254	1.0113
gt;MAE54780 unknown protein	266	4304	11.5178	9.7291	6.559	3.1396	0.8791	1.29	0.7101	0.966	0.6179	0.7719	0.5357	0.6301	0.4592	0.5077	0.3826
gt;MAE45980 ATP-dependent helicase PcrA	357	4282	28.4943	22.0283	6.6969	5.3759	2.8359	2.3921	1.7356	1.5683	1.3659	1.2993	1.2292	1.209	1.1872	1.182	1.1764
gt;MAE30700 hypothetical protein	456	4266	52.1756	45.1136	20.2858	17.3655	11.4759	10.1356	7.8222	7.1394	5.971	5.5843	4.9022	4.6567	4.2228	4.0483	3.7564
gt;MAE15400 phosphoribosylformyl glycinamidine synthetase II	307	4234	17.5451	13.9044	3.4876	3.227	1.6263	1.6244	1.2255	1.249	1.1303	1.1519	1.1113	1.1244	1.112	1.1209	1.1195
gt;MAE39020 glycine dehydrogenase	403	4200	32.0015	23.917	7.833	6.8275	3.6043	3.2836	2.2646	2.0879	1.6802	1.5658	1.3725	1.2984	1.2003	1.1501	1.091
gt;MAE57850 hypothetical protein	283	4196	15.5356	10.6347	2.8662	2.66	1.4127	1.4368	1.086	1.0964	0.9576	0.956	0.8993	0.8907	0.855	0.8456	0.8239
gt;MAE40820 protein serine/threonine phosphatase	243	4176	14.4498	11.4659	3.204	2.5609	1.5044	1.381	1.1862	1.1813	1.1433	1.1657	1.1634	1.1828	1.1911	1.2104	1.2232
gt;MAE21380 5-methyltetrahydrofolate--homocysteine methyltransferase	528	4158	50.5467	43.5209	16.1397	14.3313	8.2214	7.1268	5.0003	4.3328	3.4042	3.0021	2.5354	2.2816	2.024	1.858	1.7112
gt;MAE03410 60 kDa molecular chaperonin 2	237	4150	11.6271	9.7854	1.9213	2.1615	1.1945	1.3421	1.1223	1.203	1.1485	1.2072	1.2024	1.2412	1.2533	1.2802	1.2947
gt;MAE40060 coenzyme F420 hydrogenase subunit beta	203	4126	14.0288	8.6469	2.7116	1.9564	1.3366	1.2006	1.1046	1.0833	1.0661	1.0671	1.0638	1.0658	1.0662	1.067	1.067
gt;MAE30640 DEAD/DEAH box helicase-like protein	313	4074	27.6572	19.976	6.8809	4.9341	2.8617	2.211	1.6939	1.4665	1.3072	1.2297	1.1749	1.1514	1.1347	1.1308	1.1303
gt;MAE57770 apoptotic protease-activating factor 1 like	704	4044	65.5294	63.2252	24.8534	26.3408	15.9463	16.2164	11.9524	11.8052	9.6716	9.4112	8.2007	7.9242	7.1706	6.9159	6.4166
gt;MAE41360 UPF0182 protein	351	3992	25.3874	19.3168	6.0417	5.2471	2.7092	2.458	1.644	1.5374	1.206	1.1516	1.0023	0.9609	0.8757	0.8479	0.7988
gt;MAE48230 DNA gyrase subunit B	314	3992	30.4626	22.4213	8.4307	6.2748	3.7096	2.9235	2.1768	1.8547	1.5858	1.4461	1.337	1.275	1.2297	1.2027	1.1788
gt;MAE42420 transposase	212	3968	11.1842	10.4469	2.8224	2.3193	1.4336	1.2767	1.116	1.07	1.0376	1.0263	1.0184	1.015	1.0136	1.0129	1.0125
gt;MAE02750 hypothetical protein	379	3962	30.8648	22.2684	7.9885	6.6423	3.5856	3.219	2.112	2.003	1.5067	1.4666	1.2053	1.1758	1.0234	0.9873	0.8862
gt;MAE17790 4-alpha-glucanotransferase (EC 2.4.1.25)	369	3920	29.6365	23.8706	7.7681	6.4623	3.4167	3.0313	2.0465	1.9423	1.5313	1.5125	1.3202	1.3262	1.2326	1.2474	1.1961
gt;MAE60970 Na+/H+ antiporter	206	3888	10.1284	8.644	4.9506	1.6557	0.7794	1.1559	0.7372	0.9355	0.6885	0.7828	0.6255	0.6625	0.5483	0.556	0.4645
gt;MAE23370 multidrug efflux transporter	371	3884	28.0136	20.8507	6.1914	5.9726	2.8132	2.9497	1.8262	1.9053	1.4133	1.4399	1.1966	1.1827	1.0435	1.0094	0.9175
gt;MAE27800 similar to polyketide synthase	668	3878	75.0824	73.1535	31.8057	29.8439	19.7637	17.908	14.0818	12.7376	10.8711	9.9231	8.8552	8.1796	7.4963	6.9997	6.5349
gt;MAE01910 cell division protein FtsH	256	3844	19.2246	12.7753	4.342	3.4053	2.0396	1.7857	1.4368	1.3446	1.2417	1.2166	1.1884	1.1915	1.1929	1.2045	1.2153
gt;MAE16300 hypothetical protein	549	3840	56.7798	51.964	21.6685	20.9329	12.9646	12.6039	9.3066	9.0544	7.3495	7.1473	6.1534	5.976	5.3437	5.1915	4.7588
gt;MAE09050 glutamate--ammonia ligase	301	3826	16.9549	13.7582	3.5277	3.5508	1.7626	1.8531	1.3291	1.3914	1.211	1.2498	1.183	1.2046	1.1811	1.1973	1.19
gt;MAE45180 hypothetical protein	380	3826	31.1107	24.6414	8.1447	7.1	3.702	3.385	2.2483	2.1291	1.6522	1.6076	1.3821	1.3636	1.2518	1.2472	1.1923
gt;MAE25340 succinate-semialdehyde dehydrogenase [NAD(P)+] (EC 1.2.1.16)	173	3824	35.1107	27.6414	10.1447	8.1	5.702	4.385	3.2483	2.1291	1.6522	1.6076	1.3821	1.3636	1.2518	1.2472	1.1923
gt;MAE38470 putative diguanylate cyclase/phosphodiesterase	279	3808	16.3048	14.4601	3.6199	3.4492	1.7752	1.6976	1.3078	1.2783	1.1729	1.1654	1.1366	1.1376	1.1328	1.1356	1.1358
gt;MAE58780 hypothetical protein	211	3804	9.9844	8.851	2.1032	1.9783	1.2324	1.2143	1.1077	1.1143	1.0992	1.106	1.1072	1.1117	1.1133	1.1164	1.1196
gt;MAE57930 DNA recombinase	331	3788	24.2168	18.6161	5.7389	5.418	2.8909	2.8179	2.0081	1.9519	1.6292	1.5814	1.4353	1.3996	1.3281	1.305	1.2705
gt;MAE25530 transposase	256	3762	19.1812	14.0826	4.2883	3.2473	1.87	1.5757	1.2646	1.1714	1.0799	1.0504	1.0219	1.0086	0.9985	0.9941	0.9891
gt;MAE11020 NAD-dependent epimerase/dehydratase	152	3752	7.0826	4.8451	1.4776	1.3773	1.1028	1.105	1.07	1.076	1.0726	1.0761	1.0773	1.0811	1.0822	1.0859	1.0875
gt;MAE38050 serine/threonine protein kinase	331	3750	28.8213	23.2959	8.1097	6.5239	3.7528	3.1074	2.2924	1.991	1.6757	1.5161	1.371	1.2818	1.2091	1.1591	1.12
gt;MAE40710 hypothetical protein	132	3746	3.8442	3.5482	1.1288	1.136	1.0034	1.0063	0.9946	0.9952	0.9897	0.9879	0.9847	0.9824	0.9791	0.9777	0.9756
gt;MAE50730 adenine-specific methylase like	593	3746	72.6265	66.6784	30.1776	26.6862	17.9637	15.7162	12.4137	10.975	9.3625	8.4198	7.4907	6.8455	6.2542	5.8016	5.3983
gt;MAE53550 serine/threonine protein kinase	221	3740	9.2918	10.0066	2.3582	2.3579	1.3651	1.3493	1.1571	1.1637	1.1202	1.1293	1.1198	1.1254	1.1264	1.1292	1.1319
gt;MAE60960 phosphotransacetylase	288	3734	20.2075	15.4184	4.4381	3.6528	1.9652	1.7386	1.3439	1.2784	1.1696	1.1566	1.1289	1.1356	1.1311	1.1411	1.1463
gt;MAE41370 hypothetical protein	184	3728	7.645	6.4265	1.6072	1.5908	1.1027	1.1423	1.0587	1.0872	1.0666	1.086	1.0779	1.0911	1.087	1.096	1.0922
gt;MAE07560 NADH-dependent glutamate synthase large subunit	659	3706	73.5854	71.5363	31.0307	30.5211	20.008	19.1035	14.8802	14.025	11.9017	11.1863	9.957	9.373	8.5783	8.115	7.5732
gt;MAE19200 unknown protein	478	3662	48.1916	42.7838	16.4876	13.869	8.1943	6.7102	4.7802	3.955	3.1278	2.6648	2.2529	1.9885	1.7698	1.6161	1.4912
gt;MAE13130 putative methyltransferase	216	3636	11.1309	9.7252	2.4338	2.2231	1.334	1.2903	1.1366	1.1403	1.1152	1.1258	1.1237	1.1343	1.1367	1.1439	1.1459
gt;MAE11600 hypothetical protein	448	3636	38.4464	32.9445	11.717	10.6958	5.9138	5.5221	3.6953	3.5572	2.6531	2.6096	2.0979	2.0886	1.7692	1.7726	1.5648
gt;MAE24520 hypothetical protein	169	3618	7.498	6.4382	1.6935	1.5246	1.0997	1.0699	1.0269	1.0266	1.024	1.0267	1.0293	1.033	1.034	1.0356	1.0363
gt;MAE01310 flavoprotein	261	3614	15.4603	14.002	3.6173	3.0547	1.6709	1.4804	1.2129	1.1581	1.1045	1.0905	1.0808	1.0773	1.0757	1.0751	1.0752
gt;MAE54920 WD-repeat protein	622	3604	71.1015	69.3848	30.303	27.6575	17.9586	15.9986	12.2107	10.9504	9.0537	8.2298	7.1248	6.5656	5.8588	5.4507	4.9734
gt;MAE56700 TPR repeat protein	363	3598	29.0198	24.2527	7.7277	7.0152	3.6622	3.4545	2.3384	2.2422	1.7889	1.7342	1.5247	1.491	1.3873	1.3639	1.3123
gt;MAE46100 TPR repeat precursor	292	3596	18.7998	16.8736	4.4968	4.0284	2.0823	1.8843	1.4043	1.3209	1.1652	1.1353	1.0829	1.0682	1.0499	1.0433	1.0365
gt;MAE30600 serine/threonine protein kinase	308	3582	24.575	19.8152	6.3613	5.1633	2.849	2.3852	1.7654	1.5701	1.3715	1.2916	1.219	1.1881	1.1581	1.1467	1.136
gt;MAE13000 putative helicase	404	3578	31.4942	24.1631	7.9744	7.0352	3.6652	3.3099	2.1947	2.0112	1.5618	1.4503	1.245	1.1728	1.0693	1.0285	0.9721
gt;MAE31960 preprotein translocase SecA subunit	429	3578	41.9144	37.2724	14.3646	12.1743	7.4084	6.1537	4.5551	3.8534	3.1535	2.7512	2.3935	2.1527	1.9525	1.8005	1.6773
gt;MAE01800 tetratricopeptide repeat protein	274	3570	20.7988	13.7256	3.954	3.0114	1.6812	1.5016	1.2279	1.197	1.1367	1.1352	1.1289	1.137	1.1405	1.1456	1.1506
gt;MAE43720 cobalt-chelatase subunit CobN	505	3570	41.9842	41.131	13.6367	13.2559	6.9503	6.4154	4.2016	3.796	2.8338	2.5628	2.0955	1.923	1.6802	1.5719	1.4345
gt;MAE38680 glutamate-1-semialdehyde aminomutase	172	3564	5.9102	5.396	1.3889	1.4224	1.0886	1.1231	1.0891	1.1156	1.1207	1.1376	1.1473	1.1602	1.1709	1.1826	1.1913
gt;MAE01880 serine/threonine kinase	185	3564	8.1082	6.0578	1.6892	1.5931	1.1365	1.1755	1.0922	1.1304	1.1198	1.1499	1.1622	1.1859	1.2003	1.2135	1.2271
gt;MAE53680 signal recognition particle protein	218	3560	13.8763	9.7656	2.9593	2.3733	1.4845	1.3627	1.1889	1.1617	1.1168	1.1148	1.1062	1.1051	1.1051	1.1045	1.1041
gt;MAE11140 hypothetical protein	180	3558	7.9638	6.1742	1.5756	1.5218	1.0827	1.1204	1.0599	1.0908	1.0804	1.0995	1.1005	1.1104	1.113	1.1176	1.1194
gt;MAE32770 transposase	122	3552	3.4568	3.6753	1.0866	1.2069	0.9906	1.0439	1.0072	1.0385	1.0312	1.0489	1.0497	1.0584	1.0635	1.0682	1.0729
gt;MAE54560 hemolysin secretion protein	302	3548	20.4256	18.5089	5.3074	4.486	2.3791	2.0479	1.5183	1.3856	1.2268	1.1769	1.1206	1.1009	1.0828	1.0716	1.063
gt;MAE40810 serine/threonine protein kinase	303	3548	30.6936	25.9302	10.9388	9.5302	6.3586	5.632	4.5473	4.1265	3.6391	3.3749	3.107	2.9217	2.7519	2.6182	2.4952
gt;MAE03320 hypothetical protein	143	3542	4.3159	4.6021	1.1179	1.3845	0.9771	1.0943	0.989	1.0476	1.0031	1.0304	1.0119	1.0201	1.0125	1.017	1.0121
gt;MAE58430 transposase	167	3538	9.0255	6.409	1.9836	1.6524	1.2176	1.1516	1.0472	1.042	0.9892	1.0016	0.964	0.9781	0.9479	0.9622	0.9369
gt;MAE51750 putative hydroxyacylglutathione hydrolase	324	3536	27.7755	21.1689	7.6395	6.1807	3.6644	3.095	2.3402	2.0778	1.7799	1.6452	1.5096	1.44	1.3833	1.3495	1.3206
gt;MAE39100 peptidase M61	242	3520	13.285	10.9293	2.8053	2.6983	1.4903	1.5008	1.2125	1.2344	1.1508	1.166	1.1407	1.1521	1.1445	1.1519	1.1498
gt;MAE60830 glycoside hydrolase family 57	251	3518	16.2559	12.3415	3.4296	2.7323	1.5663	1.4014	1.1699	1.1327	1.0824	1.0769	1.0651	1.0632	1.0608	1.0609	1.0606
gt;MAE24190 glutamyl-tRNA(Gln) amidotransferase subunit A	168	3506	5.3167	5.0319	1.281	1.4872	1.0623	1.1704	1.0958	1.1533	1.1479	1.1843	1.1954	1.2254	1.2397	1.2655	1.2768
gt;MAE29110 ferredoxin-dependent glutamate synthase	655	3498	73.0841	70.8115	31.2275	30.2247	19.7754	18.7525	14.4589	13.6222	11.4296	10.7704	9.4849	8.957	8.1292	7.7067	7.1323
gt;MAE11160 isoleucyl-tRNA synthetase	443	3496	49.0928	41.7373	17.805	15.6242	10.1316	9.1347	7.0585	6.521	5.5017	5.174	4.5933	4.3683	4.0044	3.8418	3.5932
gt;MAE36430 hypothetical protein	226	3494	11.185	9.8076	2.4771	2.2693	1.3327	1.3103	1.1372	1.1459	1.1147	1.1274	1.1244	1.1354	1.1389	1.1465	1.1523
gt;MAE61570 magnesium protoporphyrin IX chelatase subunit H	543	3492	58.7223	55.2546	23.9261	22.7991	14.9031	13.8994	10.7879	10.009	8.4647	7.8783	6.9828	6.5456	5.9865	5.6408	5.2581
gt;MAE23950 hypothetical protein	371	3490	31.5192	29.4993	9.9024	8.8223	4.8723	4.2083	2.9582	2.5704	2.068	1.8469	1.6131	1.4903	1.3733	1.2985	1.2378
gt;MAE32750 putative glycosyl transferase	143	3488	5.113	4.8588	1.3981	1.3578	1.0624	1.0502	0.9929	0.9858	0.9745	0.9705	0.9669	0.9628	0.9596	0.9582	0.9568
gt;MAE03310 hypothetical protein	206	3484	12.4563	9.783	2.6548	2.3653	1.3836	1.3195	1.1221	1.1073	1.0635	1.0627	1.0483	1.0496	1.0438	1.0482	1.0438
gt;MAE44880 transposase	208	3484	12.4645	10.5532	2.7807	2.4003	1.3703	1.2751	1.0749	1.0453	1	0.9942	0.9854	0.9832	0.9802	0.98	0.9793
gt;MAE03790 similar to adenylate cyclase	357	3478	28.4499	28.9431	9.2267	8.5065	4.5367	3.9936	2.7534	2.4285	1.9418	1.7629	1.5437	1.4417	1.3285	1.27	1.2087
gt;MAE56380 serine protease do-like precursor	166	3476	6.3919	5.3649	1.4253	1.4471	1.0842	1.1071	1.0672	1.0815	1.0806	1.0908	1.095	1.1023	1.1061	1.1118	1.1144
gt;MAE19800 transposase	172	3472	8.8333	7.371	2.0933	1.7444	1.1973	1.1069	1.0195	0.9947	0.9778	0.9736	0.9688	0.9674	0.9666	0.9664	0.9667
gt;MAE03820 cell division protein FtsH	259	3470	13.5093	10.4744	2.6628	2.7703	1.4301	1.5519	1.1754	1.2399	1.1204	1.1536	1.1128	1.1332	1.1247	1.1417	1.1433
gt;MAE54500 RNA polymerase beta subunit	503	3470	53.5579	48.4726	19.6356	17.4319	10.5688	9.1918	6.6374	5.7629	4.5765	4.0156	3.3752	3.0052	2.6342	2.3872	2.1572
gt;MAE46630 M48B family peptidase	234	3458	11.0065	8.9129	2.145	2.4409	1.2731	1.4272	1.0992	1.1445	1.0243	1.0278	0.9719	0.9627	0.9323	0.9173	0.8932
gt;MAE52000 putative type II DNA modification enzyme	604	3458	68.8163	66.4366	29.0306	27.6094	18.2205	16.832	13.1722	12.0977	10.2918	9.4982	8.466	7.8784	7.2174	6.776	6.3217
gt;MAE11610 hypothetical protein	253	3452	13.704	12.5256	3.1848	3.0046	1.6479	1.5689	1.2711	1.2497	1.1738	1.1729	1.1537	1.1613	1.161	1.1663	1.1702
gt;MAE23130 abortive infection protein	157	3450	4.5029	4.2993	1.134	1.3601	0.9852	1.0503	0.9571	0.9649	0.9193	0.9091	0.884	0.874	0.8589	0.85	0.8408
gt;MAE17380 peptidase C14, caspase catalytic subunit P20	270	3444	14.4733	14.636	3.7071	3.9969	1.9363	2.0327	1.4323	1.4726	1.2616	1.2851	1.2151	1.236	1.2146	1.2345	1.233
gt;MAE03170 probable glycosyl transferase	136	3438	4.2431	4.0754	1.1945	1.2892	1.021	1.0478	1.0015	1.0089	0.9962	0.9993	0.9915	0.9947	0.99	0.9913	0.9891
gt;MAE41070 transposase	198	3438	9.9484	8.7842	2.3264	1.9964	1.3031	1.2019	1.0918	1.0662	1.047	1.0432	1.0443	1.0454	1.0496	1.0515	1.0559
gt;MAE50700 acetohydroxy acid synthase	259	3434	14.731	12.9134	3.42	3.244	1.7141	1.688	1.2829	1.2868	1.1573	1.1694	1.1278	1.1352	1.1235	1.1301	1.1272
gt;MAE39840 GTP-binding protein	283	3432	20.0764	15.1241	4.3856	3.9258	2.0348	1.9944	1.4437	1.4463	1.2518	1.2569	1.1785	1.1811	1.1465	1.1459	1.1294
gt;MAE54770 unknown protein	281	3422	19.063	16.9609	4.9758	4.0629	2.2295	1.8971	1.4614	1.3461	1.2269	1.1841	1.1506	1.1395	1.1334	1.1317	1.1323
gt;MAE15200 ribonuclease E	328	3422	25.0754	21.035	6.5334	5.6454	2.9149	2.6015	1.7945	1.6648	1.3849	1.3315	1.2247	1.2089	1.1734	1.1669	1.1561
gt;MAE03370 putative SNF2 helicase	461	3418	45.3609	40.2372	14.8725	13.0704	7.4298	6.4574	4.464	3.913	3.0188	2.7009	2.2403	2.0487	1.7997	1.6783	1.5315
gt;MAE42740 arachidonate 15-lipoxygenase precursor	223	3416	12.801	9.7638	2.4647	2.4953	1.3176	1.4524	1.12	1.2215	1.1024	1.1689	1.1254	1.165	1.1471	1.1706	1.1649
gt;MAE01890 aspartoacylase	138	3400	4.783	3.901	1.1919	1.2361	1.0094	1.0298	0.99	0.9985	0.9817	0.987	0.9761	0.979	0.9717	0.9733	0.9674
gt;MAE30790 putative ATP-dependent RNA helicase	433	3400	45.7672	40.4046	16.2116	13.5976	8.1443	6.7503	4.7965	4.0481	3.1702	2.7522	2.2999	2.0542	1.8072	1.6598	1.5195
gt;MAE11110 RNA polymerase subunit gamma	286	3398	20.4989	16.6857	4.7946	4.4785	2.2845	2.2267	1.5664	1.5398	1.2942	1.2779	1.1736	1.1608	1.1131	1.1076	1.0843
gt;MAE40260 mannose-1-phosphate guanyltransferase	331	3398	23.5348	20.1942	6.0022	5.4399	2.8015	2.5382	1.7754	1.6551	1.3905	1.334	1.2342	1.2151	1.1742	1.1701	1.1561
gt;MAE54660 unknown protein	384	3392	31.4292	30.9235	10.0555	8.7893	4.7311	3.9784	2.7526	2.3513	1.882	1.6714	1.4703	1.36	1.2672	1.214	1.1706
gt;MAE40860 von Willebrand factor type A	267	3390	23.9277	16.7963	6.3442	4.9366	3.0274	2.5319	1.9947	1.7902	1.6	1.5068	1.43	1.3867	1.3527	1.33	1.316
gt;MAE56990 type III restriction enzyme res subunit	518	3388	52.7271	48.9955	18.8575	17.3573	10.1596	9.2204	6.4481	5.9019	4.5388	4.206	3.4361	3.2287	2.7528	2.6166	2.3073
gt;MAE41390 proline hydroxylase-like protein	149	3382	7.1283	5.6973	1.5986	1.5078	1.0786	1.078	1.0006	1.0142	0.9873	1.0024	0.9835	0.9986	0.9821	0.9964	0.9814
gt;MAE39030 glycosyl transferase family 39	177	3376	3.3659	3.4781	0.8019	1.4909	0.8334	1.0735	0.8059	0.8889	0.746	0.7713	0.6663	0.6525	0.5698	0.5442	0.4706
gt;MAE14470 serine/threonine protein kinase	169	3362	5.743	5.8559	1.4755	1.5922	1.1271	1.1817	1.1139	1.1548	1.1552	1.1861	1.1989	1.2147	1.2253	1.2387	1.2476
gt;MAE33620 transposase	199	3360	14.0637	11.0992	3.2607	2.5673	1.5105	1.3116	1.0967	1.0293	0.9769	0.9585	0.9458	0.9401	0.937	0.9359	0.9353
gt;MAE24820 hypothetical protein	266	3358	13.5392	15.2502	3.7096	3.8883	1.8915	1.8977	1.3724	1.3732	1.2132	1.222	1.1688	1.1811	1.1662	1.1803	1.1823
gt;MAE35510 phenylalanyl-tRNA synthetase	368	3358	31.1542	24.6187	8.11	6.4932	3.6177	2.9434	2.1574	1.8581	1.5843	1.4508	1.3449	1.2777	1.2307	1.2023	1.1814
gt;MAE40050 histone deacetylase family protein	115	3356	2.8511	2.9066	1.0565	1.1097	1.0216	1.0341	1.0283	1.0337	1.0336	1.0359	1.0357	1.0366	1.0369	1.037	1.0369
gt;MAE40040 putative hydrolase	128	3350	3.7377	3.3089	1.0637	1.1845	0.9979	1.0461	1.0117	1.0325	1.0257	1.0288	1.0278	1.0289	1.0285	1.0291	1.0286
gt;MAE37720 cell division protein FtsH	261	3348	14.1606	12.14	3.3708	3.1368	1.7863	1.6899	1.3549	1.3161	1.2144	1.2001	1.1711	1.1722	1.1666	1.1763	1.1821
gt;MAE53710 hypothetical protein	296	3348	24.0313	17.2759	5.8236	4.6138	2.5713	2.2607	1.659	1.5675	1.3501	1.3262	1.236	1.2355	1.1968	1.2065	1.1946
gt;MAE30730 hypothetical protein	141	3346	7.2568	4.6948	1.5275	1.3396	1.068	1.0675	1.0238	1.045	1.0346	1.0474	1.0447	1.0532	1.0533	1.0581	1.0595
gt;MAE15990 folylpolyglutamate synthase	186	3344	7.7249	7.4317	1.808	1.8483	1.1667	1.2117	1.066	1.0851	1.0394	1.0425	1.0281	1.0266	1.0199	1.0172	1.0146
gt;MAE37170 hypothetical protein	206	3344	9.8819	8.2296	2.0661	1.8318	1.1962	1.1674	1.0772	1.0825	1.0689	1.0759	1.0727	1.0827	1.0841	1.0924	1.0968
gt;MAE27990 porin type major outer membrane protein	219	3342	11.9187	10.9412	2.7478	2.739	1.4802	1.475	1.1786	1.1711	1.0871	1.0872	1.0595	1.061	1.0494	1.0504	1.0463
gt;MAE60500 transposase	274	3342	18.8054	17.4168	4.9572	4.0213	2.1629	1.7925	1.3737	1.2359	1.1314	1.0919	1.066	1.0566	1.0535	1.0521	1.0525
gt;MAE25600 alanyl-tRNA synthetase	381	3340	35.3975	29.9895	10.7132	9.154	5.2354	4.477	3.1935	2.7856	2.2484	2.019	1.7647	1.6282	1.4949	1.4185	1.3445
gt;MAE32950 deoxyribodipyrimidine photolyase	237	3336	14.449	11.841	3.0863	2.6727	1.4969	1.3979	1.1487	1.1198	1.0501	1.0413	1.019	1.0161	1.0072	1.0061	1.003
gt;MAE11080 chromosome segregation protein	574	3336	74.7066	73.2822	35.8016	32.4369	23.1138	20.6231	16.9534	15.2882	13.4288	12.2909	11.1818	10.3815	9.6446	9.0588	8.5332
gt;MAE16260 hypothetical protein	208	3334	11.7507	10.1965	2.7889	2.3063	1.4241	1.2849	1.1143	1.0711	1.0368	1.0279	1.0208	1.0204	1.0187	1.0193	1.0197
gt;MAE12190 magnesium protoporphyrin IX chelatase subunit H	566	3334	59.7386	55.2572	23.4449	22.8345	14.4384	13.919	10.4255	10.0056	8.1888	7.8583	6.7734	6.5086	5.8074	5.5899	5.1013
gt;MAE11740 transposase	208	3328	12.7609	11.0994	3.1157	2.5017	1.5071	1.3171	1.129	1.0688	1.0269	1.0133	1.0037	1.0002	0.9987	0.9974	0.9972
gt;MAE46420 glycosyl transferase family 39	160	3326	2.9247	3.1899	0.6649	1.4284	0.6714	1.1392	0.6854	0.9686	0.6704	0.8346	0.6282	0.7259	0.5765	0.6287	0.5137
gt;MAE56630 DNA topoisomerase I	426	3322	44.3337	38.012	14.7636	12.3233	7.3723	6.1409	4.4356	3.7719	3.0218	2.6381	2.2575	2.0259	1.8135	1.6712	1.548
gt;MAE50420 pyrimidine-specific carbamoyl-phosphate synthase large chain	455	3314	40.955	35.4375	13.0799	11.9399	6.703	6.071	4.1947	3.7902	2.968	2.6975	2.2826	2.0931	1.8621	1.7293	1.5913
gt;MAE21290 hypothetical protein	510	3314	50.4735	49.1539	19.2161	17.7733	10.6842	9.447	6.8458	5.99	4.784	4.2139	3.5726	3.1861	2.8011	2.5368	2.2925
gt;MAE23460 hypothetical protein	624	3308	57.4692	59.0056	23.5854	26.8822	15.6507	17.3613	11.9769	12.9305	9.8377	10.3897	8.429	8.745	7.4243	7.5992	6.6745
gt;MAE23880 protein conferring resistance to acetazolamide Zam	346	3300	31.8417	24.9977	8.7947	7.4746	4.0427	3.6069	2.4425	2.2507	1.7645	1.667	1.4427	1.3871	1.2757	1.2457	1.1865
gt;MAE35560 hypothetical protein	187	3292	10.6243	7.6829	2.4127	2.1816	1.3603	1.3585	1.1554	1.1756	1.125	1.1429	1.1353	1.1514	1.157	1.1669	1.1727
gt;MAE36130 RND multidrug efflux transporter	359	3292	19.1692	17.0615	4.2415	5.6604	2.2215	3.2984	1.6713	2.3998	1.4358	1.9169	1.2842	1.6016	1.1652	1.373	1.0675
gt;MAE28570 hypothetical protein	180	3290	10.9116	8.3153	2.44	1.9277	1.2714	1.1541	1.0354	0.9994	0.9705	0.9608	0.95	0.9465	0.9422	0.9404	0.9368
gt;MAE57050 hypothetical protein	133	3260	4.2342	4.5841	1.2546	1.3762	1.0113	1.0281	0.9567	0.9588	0.9419	0.9412	0.9381	0.9383	0.938	0.938	0.938
gt;MAE17510 serine/threonine protein kinase with WD40 repeats	283	3260	26.3181	20.0337	7.1726	5.4493	3.1326	2.4962	1.8568	1.6078	1.3947	1.2953	1.2195	1.1812	1.1523	1.1388	1.1307
gt;MAE46810 arginine decarboxylase	325	3258	34.6777	25.2327	9.9714	7.4213	4.4371	3.4999	2.576	2.1731	1.8139	1.6249	1.4648	1.372	1.2946	1.2459	1.2047
gt;MAE13280 DNA ligase	295	3256	27.4718	19.381	6.9314	5.0449	2.9367	2.3127	1.757	1.5282	1.3462	1.2606	1.1943	1.1632	1.1408	1.1305	1.1272
gt;MAE11010 hypothetical protein	109	3252	2.7493	2.8306	0.9801	1.1332	0.9831	1.0467	1.0179	1.0507	1.0464	1.064	1.0655	1.0729	1.0771	1.0814	1.0842
gt;MAE28730 hydrophobic amino acid uptake ABC-transporter	230	3252	18.4022	13.2271	4.6065	3.6215	2.1941	1.866	1.4875	1.3677	1.2445	1.2008	1.1596	1.1468	1.133	1.1331	1.1322
gt;MAE60080 hypothetical protein	259	3244	17.0513	15.3025	4.2636	3.8459	2.0471	1.8742	1.4146	1.3382	1.1948	1.1547	1.1027	1.0862	1.0664	1.0575	1.0475
gt;MAE41570 glycosyl transferase group 1	148	3242	5.3092	4.311	1.2747	1.4142	1.0721	1.1595	1.1011	1.144	1.1372	1.1574	1.1598	1.1666	1.1697	1.1732	1.177
gt;MAE28070 dihydrouridine synthase TIM-barrel protein yjbN	160	3240	6.4729	5.7315	1.5201	1.4042	1.066	1.06	1.0236	1.0383	1.0293	1.0427	1.0363	1.0493	1.0454	1.0566	1.0532
gt;MAE25330 pyridoxal phosphate biosynthetic protein PdxA	147	3238	5.0487	4.9369	1.3251	1.3326	1.0346	1.0355	0.9879	0.9931	0.9782	0.9784	0.97	0.9693	0.9633	0.9624	0.957
gt;MAE45770 transposase	169	3236	7.5441	7.0146	1.7945	1.7332	1.1432	1.1217	1.0079	0.9986	0.9752	0.9714	0.9651	0.9625	0.9603	0.9581	0.9563
gt;MAE59260 transposase	276	3236	19.9829	16.9049	4.874	3.8679	2.1019	1.7536	1.3597	1.2433	1.1413	1.1058	1.0805	1.0762	1.0688	1.0722	1.0686
gt;MAE48840 hypothetical protein	334	3236	26.6924	21.9754	6.7017	5.939	3.0274	2.748	1.8795	1.7428	1.4265	1.3544	1.2258	1.1943	1.1329	1.1176	1.0893
gt;MAE37440 WD-repeat protein	605	3230	79.4888	78.3464	37.4922	35.2407	24.5147	22.4832	18.1659	16.6485	14.4605	13.3536	12.0594	11.2356	10.3811	9.7566	9.1486
gt;MAE03400 unknown protein	223	3228	9.676	9.4298	2.1373	2.2641	1.2625	1.3223	1.1221	1.161	1.1202	1.1479	1.1476	1.1711	1.1829	1.2048	1.2205
gt;MAE37160 lipopolysaccharide biosynthesis	311	3228	23.3808	18.4411	5.7703	5.1056	2.7514	2.4804	1.7919	1.6618	1.4183	1.3512	1.2579	1.2235	1.1883	1.1733	1.1575
gt;MAE31310 ABC-transporter ATP-binding protein	194	3224	8.7792	7.4274	1.9014	2.0601	1.1901	1.3032	1.1058	1.175	1.1327	1.1806	1.1794	1.2175	1.2315	1.2616	1.2798
gt;MAE15020 hypothetical protein	419	3222	46.5992	41.2753	17.8907	15.6247	10.3912	9.1836	7.3088	6.6044	5.7433	5.3028	4.8349	4.5377	4.2489	4.0402	3.8418
gt;MAE39090 penicillin-binding protein	350	3220	30.387	25.2462	9.1477	7.9191	4.5915	3.9916	2.8798	2.5585	2.0932	1.9091	1.6926	1.5806	1.47	1.403	1.3409
gt;MAE01750 cation-transporting ATPase	237	3218	9.8254	6.7923	1.6558	1.9104	0.8655	1.2261	0.7409	0.9786	0.6954	0.8429	0.6585	0.7369	0.6059	0.6498	0.5565
gt;MAE28380 orotate phosphoribosyltransferase	209	3216	11.347	8.4268	2.2314	2.1523	1.2415	1.3327	1.1002	1.1782	1.1046	1.1558	1.1347	1.1717	1.1655	1.1886	1.189
gt;MAE25680 replicative DNA helicase	282	3210	22.637	18.2287	5.7895	4.6982	2.6241	2.2005	1.6629	1.4798	1.2938	1.2097	1.1369	1.0973	1.0634	1.0429	1.0264
gt;MAE46460 aminotransferase	181	3208	9.8438	7.2109	1.8444	1.8823	1.1224	1.1996	1.0172	1.0565	0.9935	1.013	0.9829	0.996	0.9762	0.9852	0.9706
gt;MAE03780 tetratricopeptide repeat protein	554	3204	57.8302	58.554	24.3397	24.824	15.9147	15.2689	11.8323	11.0703	9.4284	8.7831	7.8657	7.3667	6.788	6.4051	6.0038
gt;MAE40840 von Willebrand factor type A	183	3200	13.0545	8.5862	2.9937	2.3699	1.5548	1.3937	1.2122	1.1618	1.1153	1.0987	1.0845	1.0787	1.0751	1.0733	1.0731
gt;MAE03150 hypothetical protein	175	3198	4.5356	3.6996	0.8765	1.4443	0.7441	1.1145	0.7548	0.9493	0.7418	0.8376	0.6924	0.7384	0.6331	0.6492	0.5734
gt;MAE32500 transposase	180	3198	9.6882	8.9643	2.4215	2.1474	1.3447	1.2581	1.0784	1.0315	0.9683	0.941	0.9136	0.8994	0.8882	0.8828	0.879
gt;MAE61410 hypothetical protein	323	3196	25.7015	23.9666	7.7142	6.4569	3.5467	2.9815	2.1579	1.8926	1.5959	1.468	1.3316	1.2655	1.1996	1.1644	1.1293
gt;MAE14330 translation initiation factor IF-2	464	3194	49.6825	43.7831	18.8122	17.9391	11.466	11.0056	8.4279	8.0544	6.8061	6.4837	5.7994	5.5297	5.0994	4.8788	4.5875
gt;MAE41270 two-component hybrid sensor and regulator	443	3190	45.6843	40.9797	17.2912	15.6718	10.2327	9.2133	7.2108	6.5726	5.6212	5.2024	4.6728	4.3896	4.0614	3.8551	3.6324
gt;MAE39910 GUN4-like protein	341	3188	31.0552	24.4947	9.0773	7.6305	4.2056	3.8512	2.5436	2.495	1.8558	1.8952	1.5455	1.5872	1.384	1.4163	1.2945
gt;MAE01990 hypothetical protein	204	3186	11.5983	9.0987	2.5041	2.2831	1.3294	1.335	1.0992	1.1278	1.0536	1.0743	1.045	1.0564	1.0432	1.0518	1.0434
gt;MAE25320 cation transporter	174	3184	7.7877	7.2473	1.8912	1.7148	1.159	1.1159	1.0256	1.0172	0.999	0.9973	0.9909	0.9912	0.9875	0.9871	0.9854
gt;MAE55710 mannosyltransferase	158	3172	6.527	5.4433	1.4538	1.6121	1.1044	1.1862	1.0768	1.1152	1.0844	1.1074	1.0997	1.1103	1.1075	1.1122	1.1102
gt;MAE62520 valyl-tRNA synthetase	416	3168	41.3794	34.5737	13.9791	12.2034	7.6829	6.7034	5.1166	4.5298	3.807	3.4476	3.0652	2.8292	2.5989	2.4373	2.2902
gt;MAE46410 transposase	198	3166	11.1938	9.1612	2.3641	2.1135	1.2923	1.213	1.0708	1.0524	1.0249	1.0222	1.0141	1.0169	1.0123	1.0151	1.0125
gt;MAE46280 glycogen synthase GlgA	214	3162	10.8809	9.8416	2.4229	2.3788	1.3367	1.3477	1.1092	1.1146	1.0487	1.0549	1.0331	1.0393	1.0294	1.0344	1.0291
gt;MAE40790 unknown protein	139	3156	6.1905	4.1838	1.2711	1.4195	1.028	1.1457	1.0514	1.1202	1.0952	1.1352	1.1329	1.1579	1.1643	1.1807	1.187
gt;MAE42410 transposase	212	3154	15.9058	12.9726	4.192	3.2093	1.9263	1.591	1.2763	1.1485	1.0443	0.9914	0.9485	0.9203	0.9015	0.8899	0.8802
gt;MAE58460 hypothetical protein	368	3154	24.3184	25.7089	7.7327	10.9711	4.8661	6.8247	3.7417	4.9683	3.1598	3.9542	2.8132	3.3351	2.586	2.9269	2.4186
gt;MAE21770 processing protease	174	3146	11.3054	7.2405	2.4016	1.8509	1.3096	1.2063	1.1102	1.1027	1.0821	1.0894	1.0897	1.0976	1.1026	1.1107	1.1162
gt;MAE29830 acyl-CoA dehydrogenase	172	3142	6.6056	5.7349	1.496	1.512	1.0942	1.1319	1.071	1.1015	1.0908	1.1062	1.1086	1.116	1.1202	1.1257	1.1283
gt;MAE46110 hypothetical protein	187	3138	8.1802	8.0748	1.9169	1.9061	1.1837	1.1764	1.042	1.0402	1.0085	1.0063	0.9927	0.9883	0.9795	0.9762	0.9699
gt;MAE17170 hypothetical protein	181	3132	7.6599	7.6499	1.8311	1.8543	1.1546	1.1726	1.0334	1.0461	0.9895	0.9938	0.9673	0.9633	0.9529	0.9486	0.9427
gt;MAE09360 probable glycosyl transferase	161	3132	8.1239	6.1176	1.6531	1.6025	1.0948	1.1152	1.0159	1.0344	1.0023	1.0163	0.9987	1.0121	0.9983	1.0101	0.998
gt;MAE30710 hypothetical protein	165	3126	11.7782	7.3348	2.3864	1.8488	1.2844	1.1788	1.0842	1.0582	1.0372	1.0289	1.0239	1.0207	1.0184	1.0168	1.0159
gt;MAE09740 type IV pilus assembly protein PilQ	252	3124	16.424	12.2389	3.4403	3.4058	1.7589	1.8302	1.3335	1.3837	1.2061	1.2396	1.1717	1.196	1.1758	1.1932	1.1905
gt;MAE58730 peptide-chain-release factor 3	265	3122	20.2894	15.8133	4.8145	3.9353	2.155	1.9154	1.4499	1.3716	1.2203	1.1914	1.1343	1.1229	1.0949	1.0891	1.0756
gt;MAE05250 glycosyl transferase	167	3120	6.3831	6.1025	1.5811	1.4865	1.0883	1.0732	1.0299	1.0306	1.0255	1.0259	1.0249	1.0257	1.0254	1.0252	1.0253
gt;MAE15290 transposase	167	3118	8.2568	7.4621	2.0233	1.8221	1.1905	1.1487	1.0433	1.0368	1.02	1.0227	1.0208	1.0235	1.0236	1.0256	1.026
gt;MAE61960 alanine dehydrogenase	149	3116	4.2563	4.0249	1.142	1.3284	1.025	1.1309	1.0694	1.1213	1.1051	1.1313	1.1264	1.1436	1.143	1.1542	1.1569
gt;MAE17290 ferredoxin-sulfite reductase	293	3116	21.5612	18.6679	5.5011	4.6291	2.4812	2.1199	1.5758	1.4241	1.2511	1.1867	1.1227	1.0986	1.072	1.06	1.0486
gt;MAE49340 aldehyde-alcohol dehydrogenase	371	3112	27.9307	26.8272	8.5147	8.5903	4.4761	4.3764	2.9248	2.792	2.1639	2.0602	1.7471	1.6673	1.4939	1.4425	1.346
gt;MAE06220 ABC-type urea transport system substrate-binding protein	170	3104	9.802	7.0157	2.0096	1.799	1.2072	1.1709	1.0638	1.0575	1.0341	1.0324	1.0256	1.0249	1.0224	1.0218	1.0215
gt;MAE37280 hypothetical protein	384	3104	32.1242	31.1916	10.2453	9.3238	5.0607	4.436	3.0897	2.7118	2.1715	1.9502	1.7004	1.5704	1.444	1.3729	1.3036
gt;MAE12370 hypothetical protein	247	3102	14.528	14.5682	4.0599	3.7644	2.0557	1.882	1.4412	1.3641	1.2176	1.1819	1.132	1.1162	1.0933	1.0895	1.0787
gt;MAE53110 glycosyl transferase family 39	290	3100	14.8981	11.589	2.7697	3.5748	1.3932	2.18	1.135	1.658	1.0556	1.3819	1.0174	1.2122	0.988	1.1032	0.9625
gt;MAE16770 heat shock protein 70	226	3082	19.3793	13.5803	4.9941	3.5468	2.2326	1.7903	1.4648	1.3106	1.2064	1.1501	1.1123	1.0911	1.0767	1.0685	1.0634
gt;MAE44950 squalene-hopene-cyclase	244	3080	14.6714	10.371	2.8449	2.6561	1.4895	1.4859	1.2013	1.2109	1.1323	1.1487	1.1283	1.1442	1.1432	1.1581	1.1697
gt;MAE54080 hypothetical protein	462	3074	47.0737	43.7266	17.23	15.7644	9.4635	8.5904	6.2093	5.6409	4.5113	4.1165	3.5061	3.226	2.8566	2.6495	2.4141
gt;MAE40670 von Willebrand factor type A	194	3072	12.9595	8.9655	2.8102	2.1352	1.4021	1.2512	1.121	1.0858	1.0577	1.0522	1.0455	1.0462	1.0434	1.0456	1.0457
gt;MAE11000 hypothetical protein	123	3062	4.303	3.3562	1.1169	1.1929	1.0001	1.051	1.0128	1.0434	1.0321	1.0559	1.0458	1.0694	1.0582	1.081	1.0687
gt;MAE25310 FHA domain containing protein	216	3062	9.0885	8.0589	1.9209	2.0171	1.1771	1.2712	1.0861	1.1477	1.1076	1.1455	1.146	1.1781	1.1948	1.2237	1.245
gt;MAE40680 hypothetical protein	136	3056	3.7369	3.3249	1.0015	1.2769	0.994	1.1223	1.0622	1.1259	1.1129	1.1501	1.1482	1.1739	1.1782	1.2006	1.2101
gt;MAE39990 heat shock protein 90	285	3054	23.076	20.751	6.8953	5.986	3.3779	2.9369	2.1546	1.9203	1.6208	1.4901	1.3512	1.2776	1.2011	1.1542	1.109
gt;MAE20090 dolichol-phosphate mannosyltransferase	290	3052	11.8066	7.0276	1.7508	2.3691	0.6514	1.5985	0.4428	1.3084	0.3832	1.1234	0.363	0.9806	0.342	0.8578	0.3249
gt;MAE43520 ribonucleotide reductase subunit alpha	330	3052	34.4518	29.0492	12.1598	9.7301	6.3929	5.2639	4.1816	3.6193	3.1479	2.8366	2.5842	2.3931	2.241	2.1147	2.0065
gt;MAE16010 transposase	178	3050	12.804	9.8718	3.0631	2.4576	1.4814	1.328	1.0871	1.0286	0.9531	0.9292	0.9002	0.8859	0.8741	0.8674	0.8616
gt;MAE03160 GDP-D-mannose dehydratase	128	3048	4.1177	3.9263	1.1731	1.2316	1.0112	1.0265	0.9844	0.9891	0.9711	0.9709	0.9618	0.9604	0.9537	0.9475	0.9451
gt;MAE21260 penicillin-binding protein	279	3044	22.3331	18.3871	5.8086	5.3779	2.8707	2.7083	1.9002	1.8036	1.4864	1.4224	1.2796	1.2368	1.1688	1.1414	1.1055
gt;MAE42770 elongation factor EF-G	321	3044	27.5109	22.8732	7.6315	6.2892	3.5154	2.903	2.115	1.8241	1.5346	1.3916	1.2689	1.1961	1.1383	1.1012	1.0729
gt;MAE36760 hypothetical protein	288	3042	19.6956	18.5505	5.4247	5.0663	2.6939	2.484	1.7876	1.664	1.4058	1.3399	1.224	1.1871	1.1266	1.1014	1.0721
gt;MAE27460 cyanophycin synthetase	381	3036	33.1259	28.4252	9.7532	8.8482	4.7829	4.3218	2.9337	2.6727	2.089	1.9259	1.655	1.5556	1.417	1.356	1.2852
gt;MAE53060 transposase	120	3034	3.8564	4.144	1.2387	1.2532	1.0179	1.0119	0.9809	0.9807	0.9718	0.9694	0.9671	0.9662	0.9655	0.9654	0.9652
gt;MAE54520 RNA polymerase beta prime subunit	572	3034	68.4197	66.6288	30.3456	28.5322	19.3192	17.8018	14.1775	13.0732	11.2635	10.4667	9.4077	8.8245	8.1365	7.6922	7.2061
gt;MAE39240 magnesium protoporphyrin IX monomethyl ester [oxidative] cyclase 1 (EC 1.14.13.81)	179	3032	10.2666	8.4012	2.2275	2.0811	1.2241	1.2252	1.0301	1.0398	0.9844	0.9929	0.9766	0.9802	0.9761	0.9775	0.9763
gt;MAE22180 transposase	189	3030	16.9555	12.2061	4.4527	3.2743	2.0215	1.6506	1.3294	1.1966	1.0925	1.041	1.002	0.9792	0.9626	0.9529	0.9457
gt;MAE57980 hydroxylamine reductase	227	3030	17.0737	13.1737	4.1158	3.5264	1.9697	1.7986	1.3838	1.3212	1.1815	1.1509	1.1018	1.09	1.0699	1.0659	1.0558
gt;MAE50590 hypothetical protein YCF45	280	3030	20.4012	16.9499	5.1546	4.8597	2.4916	2.5465	1.7212	1.7782	1.4137	1.4372	1.2541	1.256	1.1596	1.1536	1.0981
gt;MAE26720 tetratricopeptide protein	273	3030	25.3669	21.5525	8.6008	7.6526	4.7241	4.2663	3.231	2.9694	2.5048	2.3363	2.0926	1.9805	1.8304	1.7533	1.6517
gt;MAE56370 UDP-N-acetylmuramyl tripeptide synthetase like	183	3026	10.8197	7.2443	2.1085	1.79	1.2173	1.1821	1.096	1.1023	1.0934	1.1061	1.1113	1.1227	1.1297	1.1386	1.1461
gt;MAE21740 UDP-N-acetylglucosamine--N-acetylmuramyl-(pentapeptide) pyrophosphoryl-undecaprenol N-acetylglucosamine transferase (EC 2.4.1.227)	125	3024	2.983	2.9487	0.9779	1.2158	1.0133	1.1261	1.0842	1.1425	1.1347	1.1711	1.1773	1.1999	1.2068	1.217	1.2248
gt;MAE20840 processing protease	181	3022	7.5867	7.564	1.8557	1.8461	1.1803	1.1791	1.0479	1.0489	1.0057	1.006	0.9853	0.9813	0.9696	0.9667	0.9585
gt;MAE27880 2-nitropropane dioxygenase (EC 1.13.11.32)	249	3014	14.0497	13.3821	3.4199	3.316	1.6963	1.6841	1.2542	1.258	1.1168	1.1249	1.0665	1.0768	1.0483	1.0545	1.0418
gt;MAE57840 Proton extrusion protein PcxA	193	3012	13.7352	8.962	2.9412	2.2954	1.4491	1.3305	1.1402	1.1235	1.0748	1.0793	1.0633	1.0695	1.0655	1.0701	1.0685
gt;MAE49370 phycobilisome core-membrane linker polypeptide	392	3010	36.6776	33.2844	12.0972	10.9058	6.0536	5.5549	3.7321	3.5282	2.6536	2.5642	2.0868	2.0434	1.7619	1.7348	1.5601
gt;MAE32780 hypothetical protein	105	3006	2.5388	2.6488	0.9644	1.1104	0.9765	1.0195	0.9991	1.0135	1.0075	1.0133	1.0093	1.0136	1.0098	1.0142	1.0101
gt;MAE52650 two-component sensor histidine kinase	200	3006	13.3578	9.1662	2.729	2.1825	1.3777	1.2804	1.122	1.1124	1.0758	1.0807	1.0689	1.0746	1.072	1.074	1.0741
gt;MAE32740 unknown protein	135	3004	4.9714	4.8205	1.3955	1.3632	1.0434	1.0214	0.9794	0.9779	0.973	0.9738	0.9739	0.9741	0.9747	0.9747	0.9748
gt;MAE11580 unknown protein	511	3004	63.2337	60.8257	28.2806	25.9123	17.8614	16.0935	12.9476	11.7449	10.1652	9.333	8.4057	7.8105	7.2035	6.7643	6.3439
gt;MAE63060 putative type IIS restriction/modification enzyme	569	3002	75.6794	76.5189	37.9523	34.7192	25.1464	22.465	18.6771	16.8173	14.8449	13.5539	12.3387	11.4142	10.5788	9.8856	9.2702
gt;MAE17200 hypothetical protein	224	3000	15.2812	12.2466	3.6551	2.9663	1.7415	1.5317	1.2555	1.1866	1.1065	1.0843	1.0589	1.0506	1.0414	1.0383	1.0352
gt;MAE38670 DNA polymerase III beta subunit	180	2996	9.1886	6.9815	1.9449	1.7789	1.1924	1.1538	1.0422	1.0355	1.007	1.0097	0.9948	1.0018	0.99	0.9989	0.9888
gt;MAE01000 hypothetical protein	548	2996	43.6423	41.943	14.995	18.4491	9.203	11.7664	6.8797	8.6531	5.6449	6.8444	4.8672	5.6796	4.3207	4.8718	3.9112
gt;MAE14460 lysine decarboxylase	187	2994	8.1776	7.2061	1.8162	1.8562	1.1763	1.2185	1.0992	1.1333	1.1161	1.1428	1.1535	1.175	1.1892	1.2054	1.2132
gt;MAE40030 probable glycosyl transferase	131	2992	4.473	3.901	1.2066	1.2669	1.0264	1.0591	1.0148	1.0277	1.014	1.0245	1.0171	1.0249	1.0215	1.0258	1.0237
gt;MAE35860 similar to hemolysin secretion protein	230	2992	15.6032	12.7236	3.5842	2.9961	1.6843	1.4966	1.2215	1.1639	1.0883	1.0742	1.0485	1.0493	1.0371	1.0423	1.032
gt;MAE14680 UDP-3-O-[3-hydroxymyristoyl] glucosamine n-acyltransferase	139	2988	4.7504	4.6288	1.2389	1.3609	1.0245	1.0682	1.0074	1.0196	1.0066	1.011	1.0067	1.0095	1.0068	1.0096	1.0077
gt;MAE06410 transposase	164	2986	9.5469	7.2227	2.1509	1.8566	1.2284	1.1855	1.0636	1.0698	1.043	1.0526	1.0463	1.0532	1.0516	1.0574	1.0582
gt;MAE15390 amidophosphoribosyltransferase	209	2984	11.0541	10.3569	2.6731	2.4644	1.4146	1.3507	1.1242	1.1021	1.0397	1.0278	1.0054	0.9986	0.9869	0.9823	0.9745
gt;MAE45590 leucyl-tRNA synthetase	397	2984	40.212	34.6644	13.5087	11.8711	7.0891	6.3789	4.5597	4.2027	3.311	3.1053	2.6021	2.4703	2.1695	2.0774	1.8805
gt;MAE07810 hypothetical protein	298	2982	21.6515	20.8121	6.3671	5.5829	3.0531	2.6368	1.9398	1.7331	1.489	1.3886	1.2901	1.2376	1.1929	1.1661	1.1406
gt;MAE49800 predicted secreted metalloprotease	235	2980	16.4163	15.8326	5.0382	4.5709	2.5498	2.301	1.6993	1.567	1.3449	1.2739	1.1791	1.141	1.0986	1.0767	1.0551
gt;MAE01300 polyphosphate kinase	324	2976	28.5626	24.0177	8.3886	7.3625	4.1877	3.6582	2.636	2.3337	1.918	1.7454	1.553	1.4568	1.3537	1.2967	1.2417
gt;MAE24510 D-alanine--D-alanine ligase	159	2974	6.8666	5.5366	1.5133	1.4845	1.0748	1.0832	1.014	1.0189	1.003	1.0066	0.9998	1.0043	0.9991	1.0041	0.9991
gt;MAE41930 hypothetical protein	138	2972	3.4541	3.3679	0.993	1.2888	0.9736	1.0651	0.9871	1.0168	0.9952	1.0091	1.0042	1.0125	1.0141	1.02	1.0206
gt;MAE28060 hypothetical protein	181	2970	7.4749	7.1233	1.7546	1.9592	1.1069	1.279	1.0439	1.1529	1.0681	1.1393	1.1067	1.1564	1.1466	1.1841	1.1887
gt;MAE60600 hypothetical protein	214	2966	12.4166	9.7812	2.7715	2.4917	1.4565	1.4174	1.1732	1.1782	1.111	1.1239	1.1038	1.115	1.1114	1.1173	1.1171
gt;MAE02100 two-component sensor histidine kinase	305	2966	26.0625	21.3338	7.3963	6.2075	3.5197	3.1132	2.2405	2.0682	1.7016	1.6169	1.4418	1.3911	1.3015	1.2701	1.218
gt;MAE20330 transposase	157	2964	7.8161	6.7458	1.826	1.6065	1.1206	1.0545	0.9537	0.9214	0.8938	0.8798	0.8663	0.8578	0.8502	0.8454	0.8396
gt;MAE23110 transposase	210	2964	18.8989	14.7564	5.5002	4.2613	2.6409	2.1659	1.6785	1.4667	1.2788	1.1721	1.0813	1.0239	0.9772	0.9434	0.9156
gt;MAE58420 O-succinylbenzoate-CoA synthase	125	2962	3.4866	3.4956	1.0645	1.2279	1.0051	1.0615	1.0257	1.0444	1.0351	1.0416	1.0393	1.0407	1.0404	1.0404	1.0404
gt;MAE09350 group 2 RNA polymerase sigma factor	212	2958	19.993	13.4848	5.082	3.7285	2.3013	1.8721	1.4861	1.3282	1.2056	1.1449	1.0962	1.074	1.0548	1.0464	1.0358
gt;MAE60440 transposase	194	2954	11.0752	9.6126	2.4969	2.1588	1.3095	1.217	1.067	1.0426	1.0144	1.0123	1.0052	1.006	1.0021	1.0027	1.0013
gt;MAE12760 ABC-transporter DevC family permease protein	162	2950	6.1793	6.6165	1.6389	1.6597	1.118	1.1143	1.0281	1.0338	1.0129	1.0216	1.0099	1.0179	1.0096	1.0169	1.0097
gt;MAE54830 hypothetical protein	218	2948	7.6687	5.5505	1.225	1.8932	0.772	1.3356	0.7081	1.0991	0.6923	0.9584	0.6667	0.8506	0.639	0.7592	0.6054
gt;MAE00570 hypothetical protein	218	2944	13.9831	11.8768	3.2782	2.8526	1.591	1.4715	1.1829	1.1536	1.0631	1.0638	1.0276	1.0394	1.0157	1.0302	1.0144
gt;MAE24180 glycosyl transferase group 1	161	2942	6.9055	6.331	1.663	1.584	1.1019	1.0852	1.0027	0.9966	0.9808	0.9802	0.9729	0.9742	0.9691	0.9692	0.9653
gt;MAE47550 FHA domain containing protein	241	2942	14.136	11.536	3.0343	2.8547	1.4552	1.5448	1.1329	1.2263	1.0757	1.1425	1.0807	1.1259	1.0989	1.1285	1.116
gt;MAE17110 serine/threonine kinase	200	2940	11.5053	9.3323	2.551	2.4566	1.3929	1.403	1.1413	1.1623	1.0836	1.1012	1.0743	1.0855	1.0744	1.08	1.078
gt;MAE57040 transposase	141	2938	5.9095	5.531	1.4833	1.5011	1.0474	1.0359	0.9488	0.9368	0.9021	0.8939	0.8828	0.8789	0.8763	0.8742	0.8722
gt;MAE41920 hypothetical protein	168	2936	3.7653	3.2494	0.7785	1.4445	0.7624	1.1418	0.7902	1.0047	0.8017	0.9155	0.7903	0.8459	0.7611	0.785	0.7275
gt;MAE54250 transposase	215	2934	14.2154	12.5748	3.5265	3.0576	1.6928	1.5371	1.2191	1.1638	1.0756	1.0572	1.0298	1.023	1.0136	1.0114	1.0068
gt;MAE43570 hypothetical protein	335	2934	27.4068	23.1847	7.3935	6.2623	3.2933	2.8385	1.9772	1.7743	1.4714	1.375	1.2558	1.2157	1.1717	1.158	1.1385
gt;MAE54550 ABC-transporter ATP-binding protein	398	2934	33.6494	28.3559	9.8283	9.6057	5.0053	5.1589	3.2534	3.4318	2.4326	2.588	1.9865	2.1086	1.719	1.8049	1.54
gt;MAE13420 hypothetical protein	339	2932	32.4336	26.4318	9.643	7.9958	4.6343	3.9604	2.856	2.5267	2.0662	1.8814	1.6597	1.5505	1.4348	1.3672	1.2987
gt;MAE48180 hypothetical protein	211	2930	11.9703	10.3241	2.7805	2.4939	1.4643	1.3734	1.1546	1.1292	1.0655	1.0654	1.0407	1.05	1.0345	1.0442	1.0357
gt;MAE06750 hypothetical protein	148	2922	7.5901	5.6461	1.6133	1.4842	1.0625	1.039	0.9561	0.9526	0.9271	0.9251	0.916	0.9145	0.9119	0.9107	0.9099
gt;MAE49210 glycosyl transferase group 1	161	2918	6.9602	6.4978	1.7815	1.7647	1.1945	1.1658	1.0431	1.029	0.9836	0.9782	0.9556	0.952	0.9443	0.9398	0.9349
gt;MAE36810 hypothetical protein	232	2914	17.5881	13.5485	4.0127	3.2314	1.817	1.5655	1.256	1.1707	1.0818	1.0547	1.0224	1.0124	0.999	0.9947	0.9845
gt;MAE23120 sulfotransferase	137	2912	5.8423	5.0324	1.424	1.3903	1.035	1.043	0.9932	1.0048	0.9917	0.9998	0.9915	0.9986	0.9929	0.9983	0.9934
gt;MAE01870 hypothetical protein	183	2912	13.9564	9.2653	3.3261	2.476	1.6244	1.4048	1.194	1.1227	1.0575	1.0279	1.0019	0.9881	0.9783	0.9716	0.9677
gt;MAE21090 transposase	275	2912	22.5167	19.0671	6.1442	4.7825	2.6806	2.1539	1.624	1.4153	1.2467	1.1621	1.1029	1.0716	1.0504	1.0384	1.031
gt;MAE62700 trigger factor	229	2910	17.9076	13.4387	4.1645	3.2955	1.8762	1.6158	1.282	1.1929	1.0952	1.065	1.032	1.0222	1.0133	1.0104	1.0087
gt;MAE60640 hypothetical protein	130	2906	7.1397	4.5348	1.4958	1.3285	1.0325	1.0228	0.9687	0.9725	0.9576	0.9628	0.9542	0.9559	0.9526	0.9519	0.9495
gt;MAE44640 hypothetical protein	241	2906	19.2818	14.3383	4.6015	3.7312	2.1666	1.8834	1.4775	1.3673	1.2333	1.1857	1.136	1.1136	1.0907	1.0796	1.0694
gt;MAE19410 hypothetical protein	361	2906	38.659	31.7524	12.7293	10.1912	6.2677	5.0266	3.7225	3.0824	2.5211	2.1785	1.8938	1.6984	1.542	1.4278	1.3362
gt;MAE05240 extracellular solute-binding protein	221	2902	13.809	10.8593	3.0859	2.6043	1.4981	1.4223	1.1598	1.1669	1.0924	1.107	1.0854	1.0995	1.0927	1.1026	1.1002
gt;MAE55700 glycosyl transferase	197	2900	14.5803	10.2119	3.4128	2.8022	1.7272	1.5652	1.268	1.2208	1.1027	1.0931	1.0298	1.0341	0.9986	1.0057	0.9811
gt;MAE48070 two-component sensor histidine kinase	339	2896	28.5412	26.2233	8.815	7.8002	4.413	3.7947	2.7592	2.4023	1.9891	1.7859	1.5959	1.4806	1.3853	1.312	1.2546
gt;MAE21970 transposase	217	2894	19.9907	14.8569	5.4373	4.158	2.4373	2.0208	1.5349	1.3821	1.2141	1.149	1.0833	1.0568	1.0276	1.0161	1.0028
gt;MAE53150 GTP pyrophosphokinase	351	2890	32.4111	25.0637	8.8436	7.4648	4.1804	3.5748	2.5235	2.2154	1.7975	1.6387	1.4487	1.3642	1.2745	1.2315	1.1835
gt;MAE49920 nucleotide-diphospho-sugar transferases superfamily	163	2886	7.7474	7.4106	2.1143	1.8999	1.2968	1.2153	1.0801	1.0408	0.9933	0.9696	0.9461	0.9303	0.9142	0.9016	0.8888
gt;MAE53540 transposase	212	2886	13.3793	13.5845	3.9881	3.3846	1.9764	1.7244	1.4019	1.3096	1.2102	1.1667	1.123	1.0986	1.0734	1.0554	1.0395
gt;MAE09330 transposase	151	2884	6.9284	5.7253	1.4917	1.5934	1.0515	1.1322	1.0066	1.0554	1.0221	1.0468	1.0374	1.0505	1.0479	1.0554	1.0551
gt;MAE33970 excinuclease ABC subunit A	438	2884	49.5348	46.6716	19.9384	17.2491	11.0467	9.3262	7.0317	5.9884	4.8958	4.2495	3.6461	3.2244	2.854	2.576	2.3326
gt;MAE60270 probable lysozyme	241	2880	15.3839	15.3204	4.3249	3.7933	2.0652	1.8347	1.4099	1.2931	1.1527	1.0947	1.0422	1.02	1.0001	0.9889	0.9804
gt;MAE41380 oligopeptides ABC-transporter permease protein	118	2878	2.5848	2.8852	0.9435	1.1948	0.9913	1.0806	1.0444	1.0836	1.0809	1.1021	1.1081	1.1239	1.1329	1.1443	1.1524
gt;MAE49260 polysaccharide deacetylase family protein	243	2872	14.7229	11.702	3.2228	3.119	1.5879	1.7032	1.2114	1.3116	1.1187	1.1863	1.1039	1.1493	1.1146	1.1466	1.1311
gt;MAE10630 transposase	218	2870	15.1963	12.3944	3.614	2.8935	1.6439	1.4578	1.2001	1.154	1.0922	1.0843	1.0727	1.0783	1.0791	1.0836	1.0869
gt;MAE53050 hypothetical protein	146	2868	5.2226	4.7174	1.3168	1.4102	1.07	1.138	1.0826	1.1314	1.1251	1.1455	1.1507	1.16	1.1636	1.1675	1.1679
gt;MAE11130 hypothetical protein	163	2866	9.1993	7.0398	1.9835	1.7004	1.1641	1.1181	1.0387	1.0434	1.0302	1.039	1.0332	1.0411	1.0352	1.0426	1.0372
gt;MAE23900 hypothetical protein	130	2862	4.9885	4.8187	1.3884	1.3451	1.0519	1.0429	1.0122	1.0194	1.0146	1.0209	1.0208	1.0246	1.0244	1.0264	1.0263
gt;MAE33440 methyl-accepting chemotaxis protein	391	2862	37.9988	35.0933	13.1248	11.9965	6.9425	6.281	4.4674	4.0419	3.2292	2.936	2.5152	2.3167	2.0741	1.9345	1.7829
gt;MAE28530 major facilitator superfamily protein	136	2860	3.8271	3.6725	1.045	1.3429	0.9778	1.0443	0.9585	0.9567	0.9187	0.9024	0.8795	0.8635	0.8473	0.8361	0.8265
gt;MAE21660 single-strand-DNA-specific exonuclease RecJ	279	2860	21.4166	15.2035	4.6606	3.7743	2.0667	1.8327	1.4059	1.337	1.2149	1.201	1.1696	1.1655	1.1604	1.161	1.1625
gt;MAE31280 copper-transporting P-type ATPase PacS	294	2854	18.0427	14.9229	4.137	4.3708	2.0985	2.3092	1.5243	1.6554	1.3158	1.3936	1.2323	1.28	1.1973	1.2241	1.1841
gt;MAE26180 hypothetical protein	181	2852	9.3302	8.2786	2.0208	2.2935	1.2544	1.3697	1.0893	1.1358	1.0395	1.068	1.0234	1.0444	1.0219	1.0362	1.0213
gt;MAE19250 hypothetical protein	231	2850	14.194	10.8963	3.0512	2.7649	1.593	1.5158	1.2455	1.223	1.1536	1.1472	1.1321	1.1351	1.1344	1.1381	1.143
gt;MAE30720 hypothetical protein	111	2848	4.6795	3.397	1.1868	1.1556	0.9754	0.9587	0.9278	0.9168	0.9071	0.9002	0.8899	0.8825	0.8782	0.8736	0.8714
gt;MAE36720 hypothetical protein	206	2846	14.2635	10.5383	3.1218	2.6529	1.5509	1.4624	1.1776	1.1572	1.0701	1.0636	1.031	1.0284	1.0164	1.0165	1.0123
gt;MAE14310 carbonic anhydrase precursor	115	2844	3.873	3.5419	1.1549	1.1356	0.9804	0.9766	0.946	0.9416	0.9313	0.9248	0.9169	0.9118	0.9086	0.9065	0.9049
gt;MAE34150 hypothetical protein	211	2842	13.8017	11.6057	3.2667	2.8206	1.6124	1.4666	1.2075	1.1588	1.0909	1.0798	1.0612	1.0617	1.056	1.0576	1.0556
gt;MAE12270 cyanobacterial phytochrome	342	2842	33.2074	26.1173	10.5977	8.9337	5.6889	4.9902	3.8722	3.5149	3.0132	2.803	2.5331	2.3972	2.2316	2.1332	2.0239
gt;MAE24490 riboflavin biosynthesis protein	268	2840	20.8343	15.7228	5.1154	4.4439	2.3397	2.2044	1.54	1.509	1.2626	1.2554	1.1535	1.1563	1.1157	1.1193	1.1026
gt;MAE51220 hypothetical protein	326	2840	23.7037	24.5701	7.468	7.492	3.7173	3.7298	2.3619	2.3982	1.7723	1.8085	1.4755	1.5013	1.3117	1.3313	1.2202
gt;MAE39210 chloroplastic outer envelope membrane protein homolog	263	2838	16.2397	15.4332	4.1732	4.1083	2.0782	2.0046	1.448	1.4065	1.2247	1.2094	1.1486	1.1476	1.1259	1.1292	1.1231
gt;MAE35850 ABC-transporter ATP-binding protein	351	2830	29.0035	23.3948	7.7231	7.7702	3.8745	4.1272	2.5874	2.7485	2.0178	2.0954	1.7185	1.7501	1.5423	1.5504	1.4306
gt;MAE52660 phosphate transport system regulatory protein PhoU	120	2828	4.2412	3.9909	1.2143	1.2941	1.0059	0.9949	0.9154	0.8828	0.8456	0.8235	0.8054	0.7929	0.781	0.772	0.7657
gt;MAE10950 unknown protein	209	2828	8.148	6.8019	1.5567	2.1983	1.0527	1.3483	0.9397	1.0595	0.8754	0.922	0.8207	0.833	0.7694	0.7619	0.7217
gt;MAE62190 hypothetical protein	148	2822	6.5621	5.1661	1.5431	1.4011	1.072	1.0676	1.017	1.0346	1.0189	1.0344	1.0288	1.0405	1.04	1.0472	1.0487
gt;MAE12480 hypothetical protein	275	2820	19.0026	14.9103	4.4529	4.3828	2.1517	2.3568	1.4787	1.6768	1.2323	1.3856	1.137	1.2403	1.0948	1.1638	1.0752
gt;MAE21730 hypothetical protein	138	2818	7.3403	5.5631	1.6786	1.4411	1.0792	1.0148	0.9477	0.9193	0.8985	0.8822	0.8633	0.8436	0.8246	0.8119	0.8002
gt;MAE19790 hypothetical protein	154	2816	7.9187	6.1622	1.7841	1.4979	1.0935	1.0263	0.9625	0.9463	0.9278	0.9209	0.9092	0.9021	0.8951	0.8906	0.8867
gt;MAE13120 hypothetical protein	167	2810	7.6298	7.5999	1.9701	1.858	1.2096	1.1669	1.061	1.0475	1.0294	1.0313	1.0273	1.0303	1.0292	1.0335	1.0331
gt;MAE51450 reverse transcriptase	289	2810	23.6426	22.2451	7.4514	6.2598	3.5166	3.0214	2.19	1.9669	1.6406	1.5317	1.3737	1.3134	1.2297	1.1855	1.1375
gt;MAE28960 ATP-dependent RNA helicase	210	2808	11.8272	11.2722	3.0721	2.7753	1.605	1.4691	1.2166	1.1625	1.0955	1.0779	1.0585	1.0541	1.0491	1.0498	1.0475
gt;MAE54990 transposase	227	2808	16.4811	14.057	4.1867	3.2818	1.8599	1.5666	1.2522	1.1511	1.0577	1.0211	0.988	0.9752	0.9674	0.9634	0.9593
gt;MAE18260 methionine aminopeptidase	131	2804	5.9156	4.6556	1.4278	1.3072	1.0311	1.0033	0.9667	0.9591	0.9478	0.9397	0.9317	0.9239	0.9154	0.907	0.9022
gt;MAE24810 hypothetical protein	343	2804	29.5713	26.9185	9.1417	7.8618	4.3948	3.6773	2.627	2.2447	1.8398	1.6413	1.4582	1.3509	1.2641	1.2099	1.1701
gt;MAE41560 O-antigen polymerase	123	2802	1.8685	2.2272	0.7093	1.2677	0.8226	1.0979	0.8688	1.0151	0.8852	0.9597	0.8777	0.9139	0.8545	0.8697	0.8232
gt;MAE60620 hypothetical protein	119	2802	4.3767	3.6927	1.1747	1.2025	0.9701	0.9803	0.932	0.9343	0.9137	0.9113	0.9037	0.9008	0.8925	0.8878	0.8831
gt;MAE17160 GMP synthetase	233	2802	16.1904	14.038	4.1892	3.7917	2.1224	1.9893	1.5122	1.4396	1.2628	1.2191	1.1425	1.1178	1.0818	1.067	1.0491
gt;MAE14780 nitrate/nitrite transport system ATP-binding protein	287	2802	19.0192	13.6399	4.4305	4.1949	2.0064	2.2316	1.3246	1.5277	1.0652	1.1985	0.9285	1.0192	0.8453	0.9036	0.78
gt;MAE15980 hypothetical protein	212	2800	12.7571	10.9803	3.1555	2.7549	1.6255	1.487	1.2304	1.1709	1.104	1.0785	1.0573	1.0479	1.0398	1.0373	1.0345
gt;MAE41880 transposase	202	2800	19.0152	14.5228	5.4087	4.0409	2.4572	1.9752	1.5368	1.339	1.1804	1.0933	1.0276	0.9826	0.9529	0.9347	0.9196
gt;MAE59090 ABC-transporter ATP-binding protein	271	2798	19.3524	13.1676	4.4536	3.9835	2.0742	2.1254	1.4043	1.4955	1.1549	1.2187	1.0384	1.0783	0.9734	0.997	0.9306
gt;MAE11540 hypothetical protein	544	2796	63.9739	65.6514	30.1896	29.5191	20.2826	19.048	15.3593	14.2779	12.4105	11.5542	10.4506	9.7931	9.0699	8.5548	8.0413
gt;MAE10310 transposase	165	2790	8.7798	7.0424	2.0165	1.695	1.1759	1.0995	1.0231	1.0051	0.9907	0.9883	0.9859	0.9858	0.9845	0.9846	0.9844
gt;MAE01900 c-type cytochrome synthesis protein Ycf5	92	2786	1.6408	2.3235	0.9055	1.2057	1.0215	1.1452	1.1108	1.1755	1.1741	1.2117	1.2205	1.2468	1.2555	1.2726	1.2802
gt;MAE22290 putative transposase	194	2786	14.8689	11.0197	3.5828	2.6592	1.6469	1.3905	1.1782	1.1023	1.0507	1.027	1.0145	1.0073	1.0019	0.9998	0.9983
gt;MAE10990 hypothetical protein	106	2780	2.3598	2.4557	0.9374	1.1464	0.9867	1.0674	1.023	1.0577	1.0445	1.0582	1.0561	1.0591	1.0594	1.0598	1.0602
gt;MAE29820 porin type major outer membrane protein	193	2780	10.4062	9.4474	2.5445	2.4379	1.4073	1.3852	1.1409	1.1432	1.0754	1.0851	1.0654	1.0737	1.066	1.0728	1.0672
gt;MAE25260 WD-repeat protein Hat	472	2780	55.5906	54.6518	25.2053	23.7838	16.4073	15.0915	12.2205	11.2288	9.7999	9.0756	8.2377	7.6995	7.1545	6.7493	6.3675
gt;MAE62880 small GTP-binding protein domain	195	2778	10.8215	8.8418	2.3773	2.2634	1.3361	1.3246	1.1104	1.114	1.0482	1.0544	1.0327	1.0377	1.0291	1.0355	1.0288
gt;MAE61060 hyalin repeat protein	465	2778	42.7243	44.2081	16.6651	18.6739	10.8502	11.5152	8.2268	8.3985	6.7248	6.7123	5.7519	5.6671	5.0738	4.9609	4.5616
gt;MAE12750 ABC-transporter DevB-like protein	211	2770	14.7858	12.9119	3.6203	2.9949	1.6874	1.4867	1.1901	1.1046	1.0094	0.9651	0.9314	0.9128	0.896	0.8813	0.8661
gt;MAE36940 hypothetical protein	276	2768	14.3754	13.1067	3.686	4.3946	2.0541	2.5737	1.5607	1.8818	1.3387	1.533	1.2025	1.3204	1.109	1.1742	1.0339
gt;MAE29050 hypothetical protein	331	2768	26.7827	28.0641	8.8903	9.1159	4.7367	4.7087	3.1358	3.0649	2.3604	2.288	1.9317	1.8621	1.6598	1.5998	1.4788
gt;MAE20320 serine/threonine kinase	209	2766	12.2628	10.1114	2.737	2.595	1.4747	1.4233	1.1619	1.1459	1.0708	1.0651	1.044	1.0411	1.0353	1.0346	1.0336
gt;MAE02360 SNF2 helicase homolog	445	2766	46.1674	42.2415	17.0958	16.2327	9.8382	9.2837	6.7128	6.3246	5.0331	4.7438	4.0004	3.7787	3.3078	3.1325	2.8176
gt;MAE10580 transposase	169	2764	9.6141	7.5818	2.1411	1.7301	1.1802	1.1002	1.0155	1.0048	0.989	0.9891	0.9855	0.9865	0.9846	0.9851	0.9829
gt;MAE05380 hypothetical protein	228	2762	14.7551	11.2943	3.1885	2.7858	1.6035	1.4671	1.2199	1.181	1.1181	1.114	1.0989	1.1053	1.1066	1.1134	1.117
gt;MAE26260 unknown protein	554	2758	51.0436	54.7678	20.136	23.8173	13.0899	14.7272	9.8713	10.6315	8.0079	8.3535	6.7704	6.9083	5.8973	5.9119	5.2248
gt;MAE13930 cysteine synthase	131	2756	4.0248	3.9772	1.1553	1.3221	0.9981	1.0857	1.0089	1.0489	1.0229	1.0416	1.028	1.0405	1.0286	1.0392	1.029
gt;MAE08090 single-strand-DNA-specific exonuclease RecJ	318	2756	26.3301	22.4638	7.8464	7.2171	4.0028	3.7088	2.5616	2.3957	1.8881	1.7867	1.5437	1.4824	1.3508	1.3158	1.2453
gt;MAE57820 hypothetical protein	165	2752	7.1506	5.6844	1.5023	1.5886	1.0553	1.1485	1.0303	1.083	1.0527	1.0833	1.079	1.1023	1.1042	1.1194	1.1256
gt;MAE29660 hypothetical protein	469	2752	47.8302	46.4101	19.2424	19.1161	11.9114	11.7248	8.7319	8.5665	7.0149	6.8569	5.9396	5.7909	5.1982	5.0591	4.6497
gt;MAE50770 hypothetical protein	426	2748	14.4938	11.9317	2.4216	4.977	1.3755	3.1824	1.0725	2.3564	0.9349	1.8858	0.8668	1.5764	0.817	1.3596	0.7676
gt;MAE13620 heat shock protein 70	282	2748	23.4644	21.2049	6.9603	6.0063	3.36	2.8477	2.0815	1.8207	1.5364	1.3994	1.28	1.212	1.1543	1.1155	1.0876
gt;MAE12600 hypothetical protein	220	2744	10.5449	9.2073	2.2252	2.8346	1.2871	1.6876	1.0944	1.3331	1.0613	1.1985	1.0631	1.1356	1.0647	1.1031	1.0592
gt;MAE48940 two-component sensor histidine kinase	248	2744	17.3005	13.4987	4.1586	3.9378	2.0581	2.0631	1.4508	1.4763	1.2359	1.2543	1.1501	1.1669	1.121	1.134	1.1143
gt;MAE17390 sulfate adenylyltransferase	173	2742	7.0768	6.5316	1.6161	1.6564	1.0903	1.1392	1.0269	1.0533	1.019	1.0351	1.0228	1.0327	1.0262	1.0319	1.0282
gt;MAE55000 transposase	167	2742	8.8348	7.616	2.058	1.7347	1.1792	1.1029	1.0264	1.0104	1.0001	0.9983	0.9979	0.998	0.9978	0.9976	0.9978
gt;MAE45970 S-adenosylmethionine synthetase	183	2742	9.269	8.8402	2.1537	2.1085	1.2551	1.2301	1.0711	1.0645	1.0337	1.0368	1.0275	1.031	1.03	1.0323	1.034
gt;MAE20800 transcription-repair coupling factor	522	2742	61.6829	61.1936	27.7574	26.9222	18.1821	17.0955	13.5573	12.6566	10.8616	10.1542	9.1055	8.556	7.8764	7.4471	6.9678
gt;MAE40780 unknown protein	80	2740	1.977	2.0565	0.9699	1.0744	1.007	1.0341	1.0391	1.0536	1.0675	1.0898	1.1124	1.1493	1.1812	1.2096	1.2275
gt;MAE62030 tetratricopeptide protein	184	2736	10.3911	9.3544	2.5033	2.2205	1.3412	1.2739	1.0803	1.0505	1.0014	0.9888	0.9716	0.9639	0.9573	0.9527	0.9497
gt;MAE41060 TPR repeat like	204	2736	11.2316	10.1966	2.6641	2.6964	1.4987	1.5184	1.2102	1.2226	1.1278	1.1327	1.1003	1.1063	1.096	1.1012	1.101
gt;MAE04950 transposase	274	2736	23.0761	19.3501	6.3574	5.083	2.8847	2.3459	1.7581	1.5209	1.3219	1.2178	1.1389	1.0899	1.059	1.0374	1.0229
gt;MAE09300 sulfate-binding protein	133	2734	4.9135	4.8077	1.339	1.4719	1.0447	1.091	0.9943	1.0059	0.9745	0.9793	0.9623	0.966	0.9525	0.9582	0.9487
gt;MAE19490 putative peptidase	159	2734	6.2394	5.969	1.5576	1.6586	1.1216	1.162	1.0677	1.0907	1.0698	1.0874	1.0836	1.0938	1.0955	1.1031	1.103
gt;MAE14670 hypothetical protein	158	2734	8.8742	7.0316	2.0482	1.7094	1.1835	1.1015	1.0068	0.9777	0.9572	0.9475	0.9413	0.937	0.9339	0.9309	0.9293
gt;MAE56540 3-oxoacyl-[acyl-carrier-protein] reductase like	107	2728	3.3659	3.2095	1.1428	1.1692	1.0256	1.0396	1.0342	1.0404	1.0429	1.0456	1.0476	1.0492	1.0501	1.0509	1.0519
gt;MAE32940 protein-tyrosine kinase	287	2726	22.7176	17.3714	5.9406	4.9943	2.8376	2.4668	1.8346	1.6642	1.4387	1.3599	1.2739	1.2412	1.21	1.1974	1.1871
gt;MAE30630 hypothetical protein	133	2722	6.0321	4.5259	1.3778	1.2921	1.0297	1.0259	0.9889	0.9958	0.9786	0.9858	0.9704	0.9766	0.9631	0.9658	0.9582
gt;MAE39260 ClpB protein	411	2722	47.5781	42.598	19.1909	16.6975	11.1896	9.781	7.6871	6.8453	5.8216	5.2865	4.7108	4.348	3.9861	3.7322	3.4932
gt;MAE24270 periplasmic protein	118	2720	6.1196	4.3084	1.4363	1.3218	1.0357	1.0175	0.9728	0.9657	0.9551	0.9518	0.9471	0.9438	0.9403	0.9375	0.9355
gt;MAE56530 hypothetical protein	140	2718	8.8943	5.8689	1.9424	1.5116	1.1354	1.0593	0.9996	0.988	0.9755	0.9717	0.9673	0.9669	0.9647	0.9643	0.9638
gt;MAE21550 Na-Ca exchanger/integrin-beta	393	2718	43.2156	41.8346	17.9053	16.8922	11.2127	10.2407	8.1873	7.4634	6.4959	5.9847	5.4419	5.0731	4.7271	4.4573	4.2116
gt;MAE08270 cation-transporting P-type ATPase	329	2716	21.327	20.2333	5.9713	6.6151	3.1397	3.6231	2.1554	2.495	1.7082	1.9514	1.4723	1.6416	1.3359	1.4533	1.252
gt;MAE43650 glucose 6-phosphate dehydrogenase assembly protein	193	2710	9.2077	9.6591	2.5157	2.5661	1.4805	1.4681	1.2006	1.1787	1.1016	1.092	1.0632	1.0585	1.051	1.0525	1.0519
gt;MAE44390 hypothetical protein	475	2710	60.4593	58.5175	27.9461	25.3815	17.828	15.9686	12.9876	11.7378	10.2221	9.3706	8.4639	7.8625	7.2693	6.8262	6.4147
gt;MAE10980 hypothetical protein	133	2708	6.3753	4.2026	1.2982	1.2978	0.9939	1.0583	0.9776	1.0233	0.9789	1.0145	0.984	1.0145	0.987	1.0149	0.9891
gt;MAE15730 potassium channel	135	2704	4.5402	4.1335	1.195	1.3148	1.0014	1.0671	0.9983	1.0252	1.0007	1.0107	0.9975	1.0034	0.9961	0.9968	0.9951
gt;MAE26090 exonuclease SbcD	190	2704	9.8981	9.1339	2.3659	2.2507	1.3335	1.2899	1.1032	1.0902	1.0405	1.0459	1.031	1.0368	1.032	1.0372	1.0347
gt;MAE56240 tetratricopeptide repeat protein 28 like	418	2704	50.2075	48.5957	22.5712	20.5889	14.2149	12.7448	10.2681	9.2773	8.0372	7.3596	6.6291	6.144	5.6603	5.3035	4.9634
gt;MAE25520 hypothetical protein	135	2702	5.1308	5.6364	1.6444	1.6996	1.2082	1.2053	1.0855	1.0728	1.0232	0.9986	0.9663	0.9415	0.9095	0.887	0.8652
gt;MAE19960 RNA-directed DNA polymerase	287	2702	26.1715	24.2104	8.7598	7.2771	4.2167	3.5388	2.5517	2.24	1.8326	1.6697	1.4699	1.3816	1.2805	1.2283	1.1729
gt;MAE12430 hypothetical protein	533	2702	50.6422	53.768	21.3357	24.449	14.434	15.753	11.135	11.715	9.1718	9.4049	7.8657	7.9307	6.9316	6.9129	6.2277
gt;MAE03300 hypothetical protein	128	2694	4.9869	4.8103	1.3172	1.3849	1.0133	1.0273	0.948	0.945	0.9231	0.9172	0.905	0.9005	0.8936	0.8906	0.8873
gt;MAE24220 UDP-N-acetyl-D-mannosaminuronic acid transferase	104	2692	2.4831	2.5039	0.9448	1.122	0.9726	1.0571	0.9924	1.0574	1.0078	1.0652	1.0231	1.0716	1.031	1.0764	1.0359
gt;MAE53870 hypothetical protein	163	2692	9.7196	7.7024	2.2629	1.874	1.2644	1.1685	1.0567	1.0306	1.0025	0.9965	0.9849	0.983	0.9754	0.9732	0.9665
gt;MAE03140 probable glycosyl transferase	179	2688	11.3097	8.2795	2.4565	2.0465	1.3243	1.2344	1.0971	1.0882	1.058	1.0653	1.059	1.0692	1.071	1.0793	1.084
gt;MAE41050 filamentous haemagglutinin-like	322	2688	30.1978	28.9548	10.7184	10.1769	5.9443	5.4247	3.9102	3.5349	2.8603	2.6034	2.2575	2.0845	1.8855	1.7725	1.6559
gt;MAE48220 two-component response regulator OmpR subfamily	114	2686	3.6855	3.4464	1.0699	1.1794	0.9539	0.9895	0.925	0.9358	0.9061	0.9032	0.8907	0.8876	0.88	0.8773	0.8751
gt;MAE49450 heat shock protein 70	305	2676	24.6604	22.5965	7.5482	6.7771	3.7981	3.3053	2.3911	2.1055	1.747	1.5875	1.4258	1.3419	1.261	1.2159	1.174
gt;MAE14300 ABC-transporter ATP-binding protein	141	2674	8.1501	5.9752	1.8301	1.493	1.1098	1.0411	0.9829	0.9627	0.9498	0.9429	0.9398	0.9379	0.935	0.9341	0.9322
gt;MAE13450 metallophosphoesterase	237	2674	16.1108	13.8073	4.3058	3.8563	2.1778	2.0131	1.534	1.4562	1.2842	1.2478	1.1702	1.1504	1.1131	1.1053	1.0868
gt;MAE02020 hypothetical protein	129	2672	7.7135	4.8122	1.6861	1.393	1.0969	1.0499	0.998	0.9864	0.9701	0.9662	0.9625	0.9604	0.9593	0.9593	0.959
gt;MAE61950 plasma membrane protein	161	2670	10.0465	8.2201	2.3871	1.9714	1.2866	1.1757	1.0427	0.9957	0.9481	0.9167	0.8897	0.8681	0.8463	0.8309	0.819
gt;MAE18170 high affinity sulfate transporter	171	2664	4.5564	3.4767	0.7883	1.5873	0.6311	1.2632	0.6752	1.1064	0.719	1.0031	0.7315	0.9173	0.7192	0.8439	0.694
gt;MAE38240 WD-repeat protein	464	2664	59.6747	58.5595	28.0493	25.8539	18.1648	16.4368	13.4068	12.2164	10.6775	9.8496	8.933	8.3385	7.7343	7.2909	6.8541
gt;MAE40010 ammonium/methylammonium permease	140	2660	3.3011	3.1469	0.8299	1.3394	0.8239	1.0849	0.8465	0.9854	0.8511	0.9165	0.8368	0.8633	0.8121	0.8122	0.774
gt;MAE58680 protease IV	251	2660	16.5486	15.355	4.3662	4.2826	2.1589	2.1897	1.4974	1.5251	1.2433	1.2602	1.1323	1.1486	1.0808	1.0887	1.0517
gt;MAE14190 site-specific DNA-methyltransferase	179	2658	9.8317	9.1718	2.8178	2.5398	1.6231	1.5048	1.2676	1.2114	1.1336	1.1039	1.0725	1.0549	1.0382	1.0286	1.0194
gt;MAE50430 putative modulator of DNA gyrase peptidase U62	203	2658	12.7077	12.1607	3.4797	2.9942	1.7207	1.5056	1.2195	1.1353	1.058	1.0276	1.0018	0.9913	0.9815	0.9783	0.9751
gt;MAE14970 transketolase	291	2656	22.02	19.1588	6.0646	5.4841	2.9606	2.6676	1.909	1.7522	1.469	1.3824	1.2689	1.2255	1.1721	1.1515	1.1236
gt;MAE10960 hypothetical protein	127	2654	4.542	3.9213	1.199	1.2718	0.9946	1.0262	0.9675	0.9845	0.9613	0.9654	0.9547	0.9559	0.9508	0.9495	0.9475
gt;MAE54440 FAD dependent oxidoreductase	219	2654	12.4878	11.5076	3.1145	3.3302	1.6681	1.9078	1.2765	1.462	1.1481	1.2793	1.1	1.1817	1.0738	1.1263	1.0614
gt;MAE38460 transposase	210	2654	16.9727	14.5266	4.7884	3.7833	2.2427	1.8783	1.4881	1.3502	1.2177	1.1535	1.0981	1.0618	1.0308	1.0096	0.9895
gt;MAE31610 transposase	164	2652	9.2851	7.9069	2.2496	1.9934	1.2479	1.2006	1.0424	1.0322	0.9895	0.99	0.9782	0.9771	0.9703	0.9705	0.9651
gt;MAE62530 isocitrate dehydrogenase (NADP+) (EC 1.1.1.42)	202	2652	12.0489	10.0065	2.845	2.5979	1.5391	1.4582	1.1908	1.1607	1.0785	1.065	1.033	1.0266	1.0124	1.0101	1.0045
gt;MAE41330 excinuclease ABC subunit B	323	2652	35.0018	28.5796	11.8203	9.7834	6.0383	5.1732	3.8148	3.3752	2.7434	2.4888	2.1555	1.9963	1.8039	1.6978	1.5795
gt;MAE38820 phosphoenolpyruvate carboxylase	467	2652	60.3269	59.0994	29.1203	26.186	18.9286	16.7972	13.9702	12.5571	11.1062	10.1532	9.2671	8.5969	7.9977	7.5054	7.0716
gt;MAE59100 glycosyl transferase group 1	155	2650	8.5905	5.7458	1.8068	1.5953	1.1521	1.145	1.0589	1.0749	1.0554	1.0672	1.0662	1.0704	1.0715	1.0742	1.0758
gt;MAE53670 thiamine-monophosphate kinase	148	2650	9.0611	6.2668	1.9916	1.6191	1.1781	1.1107	1.0477	1.0386	1.0289	1.0314	1.0295	1.0352	1.0361	1.0396	1.041
gt;MAE22620 transposase	276	2648	23.5014	22.163	7.507	6.3372	3.6371	3.0384	2.2406	1.9352	1.6291	1.4684	1.3253	1.231	1.1539	1.0967	1.0514
gt;MAE47910 carbon dioxide concentrating mechanism protein CcmM	293	2646	30.6356	26.7777	10.9553	8.8967	5.5422	4.4746	3.3376	2.7831	2.2923	1.9912	1.7488	1.5831	1.4528	1.3577	1.2847
gt;MAE52930 holliday junction DNA helicase RuvB	159	2644	7.7483	5.9836	1.6566	1.5725	1.1102	1.1037	1.0195	1.0256	0.9986	1.0037	0.9883	0.993	0.9818	0.9879	0.9771
gt;MAE37730 sugar transporter	160	2640	3.4496	3.5562	0.8126	1.5281	0.8232	1.137	0.8334	0.9803	0.8204	0.8846	0.786	0.8121	0.7403	0.7444	0.6928
gt;MAE41080 TPR repeat like	132	2640	4.9136	4.8121	1.3503	1.353	1.0492	1.0655	1.0245	1.0408	1.0374	1.0467	1.0495	1.0551	1.0584	1.0634	1.0662
gt;MAE55530 molybdate ABC-transporter permease protein	231	2640	12.4991	10.3616	2.6797	2.8929	1.2552	1.6843	0.9824	1.3389	0.9571	1.2093	0.9892	1.1612	1.0264	1.1484	1.0685
gt;MAE45060 homoserine dehydrogenase	198	2634	11.7303	9.0511	2.4989	2.6395	1.3686	1.5729	1.1257	1.2441	1.0495	1.1115	1.0166	1.0479	1.0003	1.0156	0.99
gt;MAE55440 pyruvate kinase	206	2634	13.6316	10.3774	3.0018	2.6084	1.5584	1.4142	1.1819	1.1252	1.0585	1.0366	1.0104	1.0005	0.99	0.9831	0.9778
gt;MAE23350 cell envelope-related transcriptional attenuator	208	2634	17.0072	12.3517	4.4512	3.6308	2.1426	1.9295	1.4604	1.386	1.1979	1.1742	1.0881	1.0795	1.0357	1.0344	1.0104
gt;MAE52240 probable Chi protein	316	2632	24.8841	25.6876	8.8936	8.3584	4.7454	4.2268	3.0098	2.677	2.1566	1.9507	1.6952	1.5695	1.4336	1.3609	1.2897
gt;MAE29710 hypothetical protein	323	2632	33.4984	29.0259	11.2497	9.3863	5.7349	4.7845	3.5742	3.0492	2.5206	2.2089	1.9352	1.7459	1.5915	1.4751	1.3823
gt;MAE44870 mannose-1-phosphate guanyltransferase	166	2630	6.5923	6.736	1.708	1.9064	1.2187	1.2649	1.1022	1.1195	1.0649	1.073	1.0473	1.0544	1.0395	1.0485	1.0365
gt;MAE18640 amidase enhancer	228	2630	14.1614	13.5714	3.7307	3.7401	1.9712	1.9183	1.415	1.3632	1.1925	1.1645	1.099	1.0838	1.0571	1.0497	1.0381
gt;MAE27980 pyruvate kinase	239	2630	15.9292	12.1258	3.6064	3.5524	1.898	1.9489	1.4134	1.4507	1.2326	1.2538	1.161	1.1733	1.1294	1.141	1.1204
gt;MAE03610 tetratricopeptide repeat protein	475	2628	52.7352	52.4987	23.0578	23.3836	15.3614	15.1212	11.7565	11.373	9.6267	9.2363	8.2106	7.8512	7.1882	6.8712	6.4055
gt;MAE05590 transposase	169	2626	11.1819	8.9387	2.7266	2.0888	1.3725	1.2041	1.068	1.0081	0.9607	0.9239	0.8968	0.8741	0.8539	0.8372	0.8259
gt;MAE14370 cell division protein FtsH	264	2626	24.3143	17.8351	6.3962	4.9224	2.8415	2.3404	1.751	1.5543	1.3498	1.271	1.1934	1.1643	1.1342	1.1243	1.1147
gt;MAE08110 exonuclease SbcC homolog	485	2626	62.7816	62.9997	30.7864	28.1811	20.1964	18.1463	15.0013	13.6033	11.9937	11.0319	10.0605	9.3686	8.7162	8.1995	7.7296
gt;MAE56480 ABC-transporter ATP-binding protein	277	2624	25.492	18.9789	7.1486	5.6201	3.3017	2.7524	2.0307	1.814	1.5384	1.4484	1.3367	1.2957	1.2505	1.2297	1.209
gt;MAE32960 quinolinate synthetase	137	2620	4.615	4.2241	1.1465	1.3953	0.9946	1.1062	1.0052	1.0503	1.0175	1.0367	1.0198	1.0322	1.0219	1.0309	1.0253
gt;MAE41610 ABC-transporter ATP-binding protein	276	2620	21.8602	19.9718	6.4307	5.7791	3.1564	2.8783	2.0623	1.9225	1.5816	1.4979	1.3333	1.2748	1.1855	1.1425	1.089
gt;MAE18250 aldo/keto reductase	169	2618	10.8131	7.7507	2.3491	1.9798	1.3064	1.221	1.0878	1.0641	1.0325	1.0274	1.0169	1.0163	1.0128	1.0135	1.0122
gt;MAE03390 hypothetical protein	264	2618	19.391	16.8171	5.266	5.0927	2.7134	2.6265	1.8419	1.7842	1.4693	1.4326	1.2887	1.2631	1.1947	1.1771	1.1416
gt;MAE45960 ABC-transporter ATP-binding protein	273	2618	19.4911	16.4103	4.7121	4.6559	2.3361	2.3401	1.6048	1.5927	1.3143	1.3055	1.188	1.1816	1.1256	1.1286	1.0999
gt;MAE54240 oxidoreductase alpha subunit	301	2618	27.3492	24.0076	8.9036	7.7601	4.5922	3.9208	2.8855	2.5043	2.0692	1.8495	1.6382	1.505	1.3969	1.3197	1.2596
gt;MAE40770 hypothetical protein	80	2616	2.2664	2.1264	0.9944	1.0924	1.0284	1.0751	1.0904	1.1246	1.1471	1.1624	1.168	1.1687	1.1687	1.1687	1.1687
gt;MAE31290 uroporphyrinogen decarboxylase	162	2616	7.3001	7.2861	1.869	1.9499	1.192	1.222	1.0336	1.043	0.9779	0.9826	0.9564	0.9571	0.9485	0.9489	0.9467
gt;MAE53860 light-independent protochlorophyllide reductase subunit ChlB	243	2616	20.1522	14.8243	5.1292	4.3213	2.4477	2.1604	1.59	1.4648	1.2494	1.1899	1.1055	1.0749	1.0396	1.0249	1.0062
gt;MAE14450 ABC-transporter ATP-binding protein	240	2614	13.281	10.3176	2.8226	3.2328	1.5565	1.8761	1.2385	1.4317	1.1464	1.2635	1.1206	1.193	1.1212	1.1723	1.1331
gt;MAE23090 Fe-S cluster assembly protein SufB	210	2614	15.1551	12.4604	3.6326	3.455	1.8764	1.844	1.3932	1.3694	1.2106	1.1881	1.1256	1.1133	1.0853	1.0768	1.0655
gt;MAE56250 succinate dehydrogenase flavoprotein subunit	253	2614	19.9417	17.2547	5.4674	4.4824	2.5016	2.1142	1.5934	1.4286	1.2585	1.1895	1.1291	1.0972	1.0732	1.0621	1.053
gt;MAE00210 3-isopropylmalate dehydrogenase	138	2612	5.0645	4.7783	1.3288	1.3676	1.0421	1.0614	0.9977	1.0048	0.9845	0.9874	0.9764	0.9786	0.9692	0.9689	0.9639
gt;MAE10570 unknown protein	249	2610	23.6294	20.4722	7.7123	6.3999	3.8759	3.2199	2.4209	2.0778	1.7495	1.5664	1.4084	1.3067	1.2238	1.1652	1.1188
gt;MAE48210 putative branched-chain amino acid transport system substrate-binding protein	157	2608	7.3703	5.7937	1.551	1.7288	1.0573	1.2152	1.0249	1.1187	1.0447	1.1018	1.0686	1.1078	1.0912	1.1164	1.1111
gt;MAE32720 putative glycosyl transferase	169	2604	7.8695	6.8486	1.8184	1.7297	1.1596	1.1423	1.0467	1.0455	1.0283	1.0321	1.0295	1.0327	1.0332	1.0343	1.0342
gt;MAE17710 transposase	215	2604	16.3623	14.4917	4.5562	3.6293	2.1091	1.783	1.4175	1.3035	1.1932	1.1483	1.1113	1.0918	1.0764	1.0687	1.0629
gt;MAE21690 two-component hybrid histidine kinase	285	2604	27.1718	21.2884	8.2584	6.7903	4.1443	3.451	2.6004	2.2484	1.8963	1.7053	1.5374	1.4324	1.3446	1.2844	1.2348
gt;MAE41550 probable glycosyl transferase	128	2602	5.5725	5.3438	1.5502	1.4947	1.0824	1.0461	0.9631	0.9375	0.9082	0.8955	0.8816	0.8733	0.8673	0.8627	0.8586
gt;MAE06010 acetolactate synthase	218	2600	10.6646	10.0793	2.5728	3.0317	1.4769	1.7981	1.2314	1.4121	1.1603	1.2553	1.1389	1.1914	1.1343	1.1665	1.1418
gt;MAE09040 putative carotenoid oxygenase	212	2600	14.463	11.8948	3.5441	3.1166	1.7957	1.6204	1.2958	1.223	1.1124	1.0808	1.0367	1.0195	1.0007	0.9915	0.9811
gt;MAE18770 hypothetical protein	256	2600	20.2564	16.1847	5.2516	4.5855	2.5122	2.263	1.647	1.5345	1.3067	1.2527	1.1575	1.133	1.0871	1.0726	1.0497
gt;MAE04450 DNA gyrase subunit A	375	2598	36.4951	30.1786	11.4842	10.011	5.8082	5.0565	3.5904	3.1546	2.5246	2.2686	1.9571	1.8038	1.6364	1.5412	1.448
gt;MAE28670 dihydroxyacid dehydratase	202	2596	13.2028	10.1019	3.038	2.8607	1.6999	1.6358	1.3358	1.3	1.2024	1.1834	1.152	1.1427	1.1341	1.1336	1.1324
gt;MAE60060 ABC-transporter ATP-binding protein McnF	301	2594	23.4982	21.8464	6.9182	6.3923	3.372	3.093	2.1297	1.9777	1.5881	1.507	1.3314	1.2862	1.2	1.1733	1.1264
gt;MAE40000 riboflavin biosynthesis protein RibD	160	2588	8.1672	7.4171	1.9492	1.8987	1.1721	1.1892	1.029	1.0483	1.0056	1.0192	1.0047	1.0111	1.0069	1.0106	1.0086
gt;MAE28560 hypothetical protein	157	2586	9.4729	6.8797	2.2472	1.7477	1.2332	1.1185	1.0233	0.9918	0.9652	0.9569	0.9496	0.9448	0.9395	0.9353	0.9327
gt;MAE24170 unknown protein	197	2586	12.9599	10.511	3.2248	2.8246	1.6037	1.527	1.1922	1.1868	1.0677	1.0831	1.0351	1.0516	1.0326	1.0443	1.0338
gt;MAE38140 pyruvate-flavodoxin oxidoreductase	478	2586	48.9869	46.6204	19.8718	20.1691	12.6929	12.8529	9.5619	9.6019	7.807	7.7811	6.6786	6.6115	5.8773	5.7985	5.2814
gt;MAE41580 serine acetyltransferase	102	2584	2.9378	2.96	1.0345	1.1262	0.9539	0.9597	0.9242	0.9136	0.8943	0.8844	0.8697	0.8651	0.859	0.8567	0.8549
gt;MAE32870 hypothetical protein	152	2584	9.0697	7.0059	2.0393	1.6992	1.1741	1.0983	1.0021	0.9689	0.9426	0.924	0.9104	0.8969	0.884	0.8712	0.8544
gt;MAE07200 transposase	277	2584	28.1217	22.1181	8.3351	6.4488	3.8895	3.1008	2.3233	1.96	1.6553	1.4753	1.3304	1.2362	1.1638	1.1125	1.0731
gt;MAE06170 hypothetical protein	188	2582	10.679	9.6094	2.5159	2.4205	1.3618	1.3355	1.0839	1.0732	1.003	0.998	0.9764	0.9743	0.9681	0.9679	0.9667
gt;MAE35550 ABC-transporter ATP-binding protein	108	2580	3.749	3.4402	1.1665	1.1598	1.0018	0.9962	0.9782	0.9797	0.9742	0.9756	0.9718	0.9711	0.9684	0.9673	0.9662
gt;MAE22150 DNA repair protein RadA	215	2580	16.1882	12.6917	4.0551	3.7757	2.1012	1.9903	1.4928	1.4314	1.2498	1.2186	1.1458	1.1307	1.0997	1.0919	1.0807
gt;MAE08180 adenine specific DNA methyltransferase	453	2580	56.5794	56.5498	26.9321	24.4219	17.1974	15.2315	12.4767	11.1688	9.798	8.9257	8.117	7.5166	6.9841	6.5578	6.1799
gt;MAE18670 glycosyl transferase group 1	158	2578	8.2661	6.7193	1.8169	1.769	1.1377	1.1604	1.0269	1.0539	1.0135	1.035	1.0206	1.0336	1.0313	1.0367	1.0373
gt;MAE56940 type I restriction enzyme M protein	222	2578	16.8218	11.4508	3.7095	3.3148	1.8516	1.8341	1.3546	1.3718	1.183	1.1943	1.1129	1.1237	1.0849	1.0914	1.075
gt;MAE32730 methyltransferase	134	2576	5.411	5.3981	1.5123	1.4927	1.0883	1.0692	0.9998	0.9926	0.9767	0.9708	0.9665	0.9632	0.9591	0.9574	0.9553
gt;MAE48000 transposase	167	2576	10.7632	7.9662	2.4106	1.9218	1.2872	1.1643	1.0468	1.0095	0.9801	0.9682	0.9593	0.9564	0.9537	0.9519	0.9513
gt;MAE39160 DNA polymerase III alpha subunit	384	2576	38.33	35.2362	14.1721	13.0031	7.9233	7.2426	5.2329	4.8185	3.8184	3.5472	2.9788	2.7852	2.436	2.2996	2.0742
gt;MAE45760 hypothetical protein	152	2574	3.2645	3.3532	0.7545	1.4701	0.7261	1.1269	0.7318	0.9534	0.7208	0.8386	0.6866	0.7484	0.6387	0.6689	0.5829
gt;MAE46450 Uma1 protein	120	2574	3.9197	3.9341	1.0829	1.3686	0.9908	1.0805	0.994	1.0337	1.0029	1.0256	1.0116	1.0244	1.0178	1.0249	1.0207
gt;MAE02720 ferredoxin--nitrite reductase	126	2574	5.0575	4.5431	1.3245	1.3625	1.0353	1.0624	1.013	1.0293	1.0209	1.0299	1.0281	1.0331	1.0333	1.0364	1.0378
gt;MAE36420 transposase	194	2574	12.2971	11.4584	3.4406	2.9148	1.7619	1.5499	1.2757	1.1808	1.0963	1.0536	1.0175	0.998	0.9832	0.9742	0.9683
gt;MAE08290 transposase	196	2574	14.2071	11.5909	3.611	2.8984	1.7425	1.4969	1.2259	1.1276	1.0444	1.0023	0.966	0.944	0.9274	0.9174	0.9081
gt;MAE42110 unknown protein	256	2574	16.4084	12.6657	3.7224	4.0356	2.0938	2.2145	1.5691	1.5888	1.3372	1.3252	1.2197	1.2105	1.1639	1.1601	1.142
gt;MAE46880 ribonuclease II	310	2574	35.2752	29.5336	12.9524	10.7427	7.1154	6.0505	4.7744	4.1919	3.6163	3.27	2.9553	2.7339	2.5396	2.3887	2.2578
gt;MAE40020 ammonium transporter	122	2572	2.4394	2.6845	0.7821	1.3138	0.8406	1.099	0.8865	1.0143	0.9095	0.9728	0.9173	0.9486	0.9146	0.9276	0.9063
gt;MAE59040 two-component response regulator	174	2570	13.8805	9.7698	3.4629	2.7265	1.7877	1.544	1.3087	1.2089	1.1309	1.0908	1.0597	1.0415	1.0266	1.0186	1.0112
gt;MAE60760 glycoside hydrolase family 57	307	2568	24.356	21.5666	7.8131	7.3525	4.2545	4.0035	2.8631	2.7029	2.1775	2.0666	1.7978	1.7143	1.566	1.5045	1.4184
gt;MAE58400 NADH dehydrogenase subunit 4 NdhD4	142	2566	3.0204	2.9224	0.7305	1.4166	0.739	1.1551	0.7886	1.0267	0.8025	0.9337	0.7802	0.8555	0.7421	0.7781	0.6938
gt;MAE15720 N-acetylornithine aminotransferase	178	2566	9.5571	8.1506	2.2345	2.1902	1.3396	1.3274	1.1277	1.1201	1.0566	1.056	1.0313	1.0316	1.0203	1.0219	1.0141
gt;MAE15070 putative arylsulfatase regulatory protein	184	2566	10.6985	8.833	2.6746	2.2508	1.4352	1.3032	1.1262	1.0823	1.0352	1.0203	1.0088	1.0057	1.0045	1.0033	1.0025
gt;MAE08330 DNA methyltransferase	253	2566	18.3508	18.9073	6.027	5.6207	3.1859	2.868	2.1443	1.9513	1.6739	1.5595	1.4284	1.3545	1.2839	1.2347	1.1871
gt;MAE07150 cation or drug efflux system protein	305	2564	14.2305	11.8089	3.0906	4.0866	1.4823	2.4495	1.0169	1.81	0.8225	1.4577	0.7329	1.2328	0.6771	1.078	0.6313
gt;MAE31990 adenine specific DNA methyltransferase	459	2564	55.588	54.9341	25.9643	24.4028	17.0757	15.6128	12.7216	11.6304	10.1737	9.3875	8.5198	7.9425	7.3682	6.9307	6.5136
gt;MAE48790 RNA-directed DNA polymerase	281	2562	24.2016	20.3853	7.1806	5.9745	3.4093	2.945	2.1238	1.9143	1.577	1.471	1.3038	1.2499	1.1614	1.1297	1.0789
gt;MAE38970 hypothetical protein	142	2560	7.5746	6.014	1.9145	1.6013	1.1687	1.0972	1.0197	1.002	0.984	0.9797	0.9731	0.9718	0.9671	0.9663	0.9628
gt;MAE16250 light-independent protochlorophyllide reductase subunit ChlN	211	2558	15.4683	12.3035	3.7506	3.3603	1.8406	1.7756	1.3147	1.304	1.1327	1.129	1.0574	1.0551	1.0211	1.0231	1.0072
gt;MAE04090 pilus biogenesis protein	319	2558	33.5177	27.7474	10.5378	8.4981	5.0151	4.0683	2.9508	2.4782	2.0216	1.7699	1.5518	1.4168	1.3056	1.2332	1.1786
gt;MAE33590 hypothetical protein	208	2556	12.3711	10.9002	2.9415	2.8305	1.5653	1.5375	1.2195	1.2108	1.1053	1.1017	1.065	1.0647	1.0497	1.0487	1.0414
gt;MAE23510 transposase	204	2554	14.5462	13.6635	4.3849	3.7054	2.1964	1.8948	1.5105	1.3718	1.2351	1.1597	1.0943	1.048	1.0082	0.9796	0.9502
gt;MAE43100 hypothetical protein	321	2554	30.7048	28.3485	10.8051	10.0549	5.9349	5.4392	3.93	3.5949	2.912	2.676	2.3116	2.147	1.937	1.8175	1.6862
gt;MAE21630 DNA mismatch repair protein	385	2554	38.0134	32.8592	13.4088	12.3236	7.6306	7.0335	5.2305	4.8491	3.9812	3.7154	3.2387	3.0375	2.7496	2.6023	2.4091
gt;MAE10320 putative peptidase	116	2552	3.7684	3.7302	1.1762	1.2201	1.0172	1.0321	1.0121	1.0198	1.0168	1.0217	1.0203	1.0235	1.0224	1.0256	1.0251
gt;MAE41350 hypothetical protein	141	2552	5.9293	4.9859	1.4237	1.3622	1.0577	1.0522	1.0179	1.0181	1.0132	1.015	1.0138	1.0171	1.018	1.02	1.0216
gt;MAE15220 6-phosphogluconate dehydrogenase	221	2552	18.953	14.6199	5.1916	4.1699	2.5397	2.143	1.6749	1.4953	1.3259	1.2467	1.1738	1.1373	1.1014	1.0838	1.0629
gt;MAE24530 heat shock protein DnaJ-like	101	2544	3.5663	3.5802	1.1533	1.1997	1.0279	1.0746	1.0668	1.1009	1.1145	1.1278	1.1311	1.1318	1.1321	1.1321	1.1321
gt;MAE23220 probable restriction enzyme	218	2544	21.0713	15.3313	5.7742	4.4622	2.6376	2.1801	1.6524	1.4683	1.2857	1.2071	1.1366	1.103	1.0713	1.0586	1.0478
gt;MAE25040 UDP-N-acetylmuramate-alanine ligase	197	2542	13.0657	10.9746	3.1961	2.7822	1.6045	1.47	1.193	1.1553	1.0699	1.0693	1.0347	1.0471	1.0249	1.0432	1.0227
gt;MAE04980 transposase	277	2542	28.0371	22.6169	8.6024	6.7141	4.0901	3.2644	2.4633	2.0751	1.7478	1.55	1.3939	1.2883	1.2017	1.139	1.0948
gt;MAE33610 hypothetical protein	133	2540	5.5497	5.8096	1.5496	1.6346	1.0984	1.1148	0.993	0.9756	0.9348	0.9187	0.8922	0.8776	0.8575	0.8433	0.8302
gt;MAE46620 magnesium-protoporphyrin IX monomethylester aerobic cyclization protein homolog	173	2540	11.9719	8.1397	2.5186	2.0046	1.3112	1.2016	1.0637	1.0387	0.9984	0.9905	0.979	0.9748	0.9711	0.9696	0.9678
gt;MAE32610 DNA methylase	368	2538	40.0793	36.7234	15.7615	14.755	9.6461	8.9382	6.9902	6.4886	5.5452	5.179	4.6527	4.3779	4.0492	3.8432	3.6173
gt;MAE06130 transposase	276	2536	23.8656	21.6157	7.3224	6.1744	3.5013	2.9189	2.1301	1.845	1.5464	1.3947	1.256	1.1749	1.1034	1.0581	1.0188
gt;MAE41520 lipopolysaccharide biosynthesis protein	317	2536	30.8972	26.3361	10.1275	8.7112	5.3474	4.6166	3.4848	3.0571	2.5533	2.2937	2.0315	1.8677	1.7161	1.6062	1.51
gt;MAE36540 putative alpha-mannosidase	398	2534	44.4432	43.6765	19.6827	18.4046	12.5589	11.3793	9.1579	8.3024	7.2141	6.6045	5.9741	5.5372	5.1247	4.8052	4.5138
gt;MAE42730 glycyl-tRNA synthetase alpha chain	134	2532	6.0604	5.6172	1.5994	1.5556	1.1014	1.0607	0.9818	0.963	0.9355	0.9224	0.9093	0.9033	0.8969	0.8925	0.8884
gt;MAE60950 transposase	165	2530	9.4803	7.5733	2.0971	1.9061	1.194	1.1838	1.0306	1.0363	0.9966	1.0052	0.9923	0.9972	0.993	0.996	0.994
gt;MAE59110 arsenical pump membrane protein	118	2528	1.7233	2.1792	0.5785	1.3502	0.6883	1.1307	0.7332	0.9938	0.7374	0.8875	0.7164	0.7991	0.6787	0.715	0.6222
gt;MAE20100 hypothetical protein	133	2526	4.5525	3.8574	1.1184	1.349	0.9917	1.1163	1.0313	1.0863	1.06	1.0845	1.0732	1.0861	1.0812	1.0872	1.0861
gt;MAE12230 hypothetical protein	217	2526	13.0449	11.2925	3.2108	2.9482	1.675	1.5667	1.2502	1.2028	1.0995	1.0821	1.0391	1.0291	1.0072	0.9999	0.9894
gt;MAE08800 putative 5-oxoprolinase	278	2524	20.6427	16.7426	5.1532	4.6144	2.4782	2.247	1.6341	1.5209	1.3072	1.2492	1.1663	1.1366	1.1051	1.0958	1.0856
gt;MAE51380 cell division protein FtsH	273	2524	21.972	17.9751	5.8962	5.1771	2.6835	2.5909	1.6852	1.7418	1.3172	1.3923	1.162	1.2199	1.0888	1.132	1.0546
gt;MAE27840 heterocyst glycolipid synthase	510	2524	60.7172	62.2145	28.3769	27.7208	18.9644	17.7001	14.2839	13.1876	11.5009	10.6588	9.6705	9.0396	8.3974	7.9163	7.4616
gt;MAE11550 hypothetical protein	307	2522	25.5232	24.6626	7.9854	7.6027	4.0906	3.8464	2.6925	2.5151	2.0337	1.9021	1.6695	1.5811	1.4556	1.3907	1.3179
gt;MAE33630 hypothetical protein	109	2520	3.6648	3.7102	1.1587	1.2123	0.99	0.9882	0.9524	0.9462	0.929	0.9203	0.9033	0.8868	0.8692	0.8549	0.8414
gt;MAE36950 hypothetical protein	197	2520	11.2119	10.8934	3.0242	2.9626	1.7251	1.6335	1.3278	1.2702	1.1706	1.1347	1.0981	1.0808	1.0641	1.0575	1.0475
gt;MAE43110 transposase	195	2520	12.9909	11.5911	3.3531	2.7885	1.6119	1.42	1.1685	1.0958	1.0309	1.0054	0.9848	0.9762	0.97	0.9669	0.9647
gt;MAE59890 DNA gyrase subunit A	373	2520	35.4525	32.0719	12.348	11.532	6.8102	6.2768	4.5129	4.143	3.3274	3.0701	2.6428	2.4542	2.2104	2.0811	1.9274
gt;MAE39110 probable branched-chain amino acid aminotransferase	121	2518	4.1575	3.5565	1.1431	1.2038	0.9853	1.0062	0.9729	0.9746	0.967	0.9645	0.9621	0.9611	0.9604	0.9601	0.9599
gt;MAE59000 hypothetical protein	162	2514	8.3829	8.1258	2.5485	2.2532	1.5348	1.4199	1.2422	1.1875	1.1255	1.0897	1.0579	1.0316	1.0068	0.9841	0.9619
gt;MAE26440 transposase	186	2512	15.3555	12.301	3.964	3.112	1.8439	1.5882	1.3082	1.2365	1.1642	1.1557	1.1438	1.1484	1.1501	1.1556	1.1569
gt;MAE42460 transposase	210	2506	15.6036	14.8132	4.9585	4.0982	2.5232	2.1362	1.7163	1.5421	1.3996	1.3236	1.2639	1.2304	1.202	1.1852	1.1718
gt;MAE31300 NAD-dependent epimerase/dehydratase	136	2504	5.9941	6.195	1.6282	1.6729	1.1088	1.1089	0.9845	0.9667	0.9267	0.9107	0.89	0.8764	0.8648	0.8567	0.8478
gt;MAE23430 transposase	164	2504	8.9133	8.6954	2.6551	2.3361	1.4904	1.3671	1.157	1.1032	1.0327	1.0107	0.9779	0.9657	0.9498	0.9428	0.9356
gt;MAE37190 putative arsenical pump-driving ATPase	168	2504	9.7362	6.6502	1.9326	1.9054	1.1777	1.2473	1.0517	1.0912	1.0253	1.0485	1.0243	1.0333	1.024	1.0297	1.0236
gt;MAE01840 hypothetical protein	210	2504	16.5419	12.6892	4.2135	3.5927	2.0598	1.8686	1.4277	1.3418	1.1857	1.1358	1.0704	1.0446	1.0158	1.0008	0.987
gt;MAE21760 hypothetical protein	106	2502	3.9559	3.3439	1.1343	1.2423	1.0057	1.0346	0.9855	0.9928	0.9737	0.9761	0.9661	0.9677	0.9594	0.9583	0.9527
gt;MAE34920 glutamine-dependent NAD(+) synthetase	207	2502	12.8617	9.7055	2.8255	2.5566	1.5023	1.4467	1.1872	1.1764	1.101	1.1021	1.0796	1.0856	1.0826	1.0873	1.0874
gt;MAE32490 periplasmic binding protein	156	2500	6.723	7.4581	2.0671	2.3011	1.4254	1.4769	1.2216	1.2214	1.1247	1.1135	1.068	1.0571	1.0399	1.0368	1.0281
gt;MAE45420 transposase	198	2500	14.0178	11.7237	3.7444	2.9292	1.7893	1.5172	1.2555	1.1538	1.0717	1.0256	0.9937	0.9679	0.9502	0.9375	0.9249
gt;MAE39010 lipid A disaccharide synthase	165	2498	6.2563	4.6557	1.1798	1.5861	0.9724	1.1848	1.005	1.104	1.0432	1.0945	1.0756	1.1032	1.1012	1.1184	1.1237
gt;MAE30320 transposase	272	2498	22.1241	18.8243	6.1934	5.4177	2.9013	2.6786	1.8385	1.7641	1.4172	1.3869	1.2234	1.2081	1.1266	1.124	1.0819
gt;MAE52210 metal dependent phosphohydrolase HD region	294	2498	25.5219	19.691	6.5854	6.2342	3.2848	3.2603	2.2233	2.1938	1.753	1.7158	1.5014	1.4666	1.3606	1.3329	1.2748
gt;MAE06200 urea transport system permease protein	114	2496	2.2726	2.3453	0.7424	1.2863	0.8395	1.1187	0.8931	1.0391	0.9061	0.9888	0.9059	0.9527	0.9003	0.9305	0.8947
gt;MAE18110 DNA polymerase I	428	2496	51.6942	49.9278	23.2741	21.6422	14.8681	13.6163	10.9465	10.0569	8.7312	8.0971	7.3244	6.8583	6.3562	6.0083	5.6607
gt;MAE04110 pilin biogenesis protein	145	2492	4.2825	4.6966	1.1531	1.6396	1.0095	1.2165	1.0347	1.1314	1.0682	1.1198	1.0954	1.1284	1.1222	1.1422	1.1446
gt;MAE36480 L-aspartate oxidase	223	2492	14.0211	11.1329	3.1054	2.9159	1.5418	1.5791	1.1855	1.247	1.1143	1.1571	1.1074	1.1378	1.1201	1.1429	1.14
gt;MAE61240 aconitate hydratase	360	2492	32.6976	28.7566	10.7211	10.185	6.0226	5.5267	4.0239	3.6442	2.9607	2.7041	2.3494	2.1702	1.9649	1.8414	1.7175
gt;MAE38010 transposase	212	2490	18.1116	15.487	5.2305	4.0047	2.3511	1.9193	1.5149	1.3612	1.2382	1.187	1.1513	1.1388	1.1312	1.1336	1.1363
gt;MAE58960 S-adenosylmethionine:tRNA ribosyltransferase-isomerase (EC 2.4.2.-)	161	2488	7.6272	7.1336	1.816	1.9104	1.118	1.2272	1.0112	1.0767	1.0032	1.0413	1.0135	1.0337	1.0259	1.0382	1.0341
gt;MAE26980 transposase	223	2488	16.1856	15.0494	4.7783	4.2249	2.4235	2.1524	1.6456	1.5016	1.326	1.2503	1.1763	1.1351	1.097	1.0768	1.0592
gt;MAE60820 clock-associated histidine kinase SasA	188	2486	13.548	10.0322	3.1627	2.4974	1.5425	1.349	1.128	1.0586	0.99	0.9642	0.9378	0.9265	0.9179	0.9128	0.91
gt;MAE52690 glutamyl-tRNA synthetase	213	2486	18.9758	12.7751	4.4268	3.3131	2.0013	1.6651	1.3533	1.2355	1.1433	1.1024	1.0694	1.0563	1.0433	1.0384	1.0352
gt;MAE60630 hypothetical protein	92	2484	2.4695	2.4869	0.9916	1.0715	0.9563	0.9656	0.9321	0.9265	0.9095	0.9009	0.8901	0.882	0.8739	0.8671	0.8615
gt;MAE15280 WD-repeat protein	147	2484	7.2921	7.1698	2.0166	1.8783	1.2365	1.1834	1.0359	0.9969	0.9433	0.921	0.8959	0.8836	0.8701	0.8588	0.848
gt;MAE13170 unknown protein	277	2484	26.1316	22.2026	8.3862	7.372	4.4029	3.872	2.8584	2.5527	2.1121	1.9243	1.7065	1.5851	1.4663	1.386	1.3173
gt;MAE50040 putative poly(3-hydroxyalkanoate) synthase component PhaE	148	2482	6.9932	7.2536	1.9175	1.8568	1.1956	1.1666	1.0245	1.0016	0.9617	0.9505	0.9335	0.9234	0.9114	0.9034	0.8959
gt;MAE24340 hypothetical protein	293	2482	26.7274	21.9208	7.8183	6.6813	3.7714	3.2377	2.3108	2.0392	1.677	1.5369	1.3753	1.2995	1.2209	1.183	1.1409
gt;MAE37530 DNA polymerase III alpha subunit	194	2478	13.5116	10.6059	3.363	2.6783	1.6632	1.4562	1.2285	1.1594	1.0967	1.0722	1.0493	1.0416	1.0332	1.0314	1.0253
gt;MAE29040 adenine specific DNA methyltransferase	483	2478	53.853	51.725	23.6181	22.7214	15.2821	14.5314	11.4192	10.8667	9.2229	8.8044	7.815	7.4876	6.8314	6.5672	6.1021
gt;MAE58760 hypothetical protein	155	2476	8.7236	7.4363	2.0821	1.9474	1.2458	1.1922	1.0397	1.0123	0.9673	0.9506	0.9319	0.9233	0.9164	0.9103	0.9042
gt;MAE28240 hypothetical protein	222	2476	11.1738	10.5107	2.6081	2.9799	1.4805	1.6817	1.2017	1.3146	1.1276	1.1933	1.118	1.1574	1.127	1.1578	1.1455
gt;MAE40830 FHA domain containing protein	80	2474	2.1085	1.9963	0.9519	1.0434	0.9525	0.9612	0.93	0.9285	0.9072	0.9008	0.887	0.8778	0.868	0.8641	0.8626
gt;MAE28500 serine/threonine protein kinase	218	2474	17.3674	12.6864	4.3211	3.7962	2.2717	2.0716	1.6159	1.5058	1.335	1.2725	1.1914	1.1545	1.1155	1.0914	1.0713
gt;MAE50030 poly(3-hydroxyalkanoate) synthase PhaC	175	2472	10.2205	10.3381	2.9795	2.638	1.6171	1.4606	1.2295	1.1585	1.0863	1.0493	1.0076	0.9748	0.9447	0.9181	0.8955
gt;MAE11730 hypothetical protein	208	2472	15.3943	12.373	4.1161	3.4548	2.0284	1.7921	1.4143	1.3212	1.2014	1.1655	1.1242	1.108	1.0943	1.0911	1.0885
gt;MAE57080 amino acid transport system substrate-binding protein	140	2470	6.4289	5.8554	1.523	1.6877	1.0875	1.1453	1.0207	1.0421	1.0095	1.0179	1.0085	1.0106	1.0064	1.0072	1.0054
gt;MAE03290 unknown protein	164	2470	10.1147	8.5377	2.2698	2.3318	1.305	1.3403	1.0619	1.0585	0.9567	0.9442	0.9039	0.8913	0.873	0.8655	0.8562
gt;MAE06890 glycosyl hydrolase, BNR repeat-containing protein	328	2470	32.8555	29.4343	11.4381	10.4068	6.2089	5.6477	4.0939	3.735	3.0148	2.7763	2.3875	2.2223	1.9958	1.8741	1.7292
gt;MAE23690 hypothetical protein	319	2468	33.4057	29.3463	12.1286	10.0819	6.4289	5.3214	4.0549	3.4398	2.8637	2.4981	2.1883	1.9713	1.791	1.6496	1.5403
gt;MAE28520 DNA repair protein RecO	110	2466	3.515	3.2869	1.1028	1.2186	1.0049	1.0538	1.0143	1.04	1.0317	1.0445	1.0453	1.053	1.0548	1.0601	1.0628
gt;MAE17480 hypothetical protein	208	2466	18.3338	13.5775	4.8157	3.8088	2.306	1.9451	1.5352	1.3826	1.2413	1.1747	1.1178	1.0883	1.0613	1.0484	1.0338
gt;MAE54360 hypothetical protein	224	2464	13.4675	12.9214	3.7872	3.8092	2.0949	2.09	1.5669	1.544	1.3478	1.3248	1.2402	1.2248	1.1883	1.1769	1.1608
gt;MAE05460 penicillin-binding protein	252	2464	20.4621	15.3959	5.0379	4.4407	2.3978	2.2214	1.5895	1.5155	1.2906	1.2572	1.1639	1.1528	1.1148	1.1119	1.0979
gt;MAE34870 putative phosphoketolase	350	2464	38.2227	35.395	16.2331	14.6314	10.1227	9.0094	7.3084	6.5783	5.747	5.2627	4.7801	4.4457	4.1378	3.9011	3.6857
gt;MAE06210 urea transport system permease protein	99	2462	1.355	1.9905	0.7499	1.1962	0.8919	1.0668	0.9224	0.9997	0.9182	0.9522	0.9003	0.9153	0.8816	0.8888	0.8624
gt;MAE04850 transposase	177	2462	11.8429	9.9859	2.9197	2.4445	1.4978	1.3347	1.1245	1.0519	0.9874	0.9523	0.922	0.9038	0.8883	0.877	0.8674
gt;MAE24850 hypothetical protein	230	2462	14.0793	13.0934	3.5281	3.578	1.8337	1.8846	1.3666	1.3822	1.196	1.1922	1.1147	1.1117	1.0751	1.0743	1.057
gt;MAE56870 aspartate transaminase	150	2460	6.1175	5.8564	1.578	1.748	1.1526	1.2157	1.0792	1.1078	1.0647	1.0829	1.0696	1.0771	1.074	1.0776	1.0757
gt;MAE21180 glycine amidinotransferase	170	2458	8.8478	8.1387	2.312	2.1355	1.3682	1.306	1.1353	1.1047	1.0533	1.0361	1.0155	1.0074	0.9944	0.9891	0.9826
gt;MAE02210 sulfate transporter	204	2456	7.5143	5.9522	1.2323	2.1124	0.7887	1.4486	0.7271	1.1718	0.7005	1.0065	0.6766	0.8913	0.6475	0.7917	0.6151
gt;MAE15840 hypothetical protein	191	2456	13.6726	11.7468	3.673	3.0287	1.8343	1.5943	1.3063	1.1999	1.0965	1.0445	0.9991	0.9683	0.946	0.9281	0.9108
gt;MAE57030 hypothetical protein	133	2454	6.0901	5.6089	1.5564	1.5312	1.0808	1.0632	0.9711	0.9486	0.9146	0.8968	0.8787	0.8634	0.848	0.8352	0.8243
gt;MAE25510 hypothetical protein	138	2452	5.9056	6.5063	1.8154	1.8436	1.2543	1.2418	1.1152	1.0998	1.0606	1.0485	1.0315	1.0234	1.014	1.0089	1.0043
gt;MAE09320 ABC-transporter substrate-binding protein	163	2450	8.6839	6.129	1.6904	1.7517	1.1367	1.1912	1.0616	1.0984	1.0681	1.098	1.0957	1.1186	1.1236	1.1362	1.1427
gt;MAE28600 putative transposase	189	2448	19.7345	14.9396	6.1114	4.5313	2.8711	2.2706	1.7727	1.5271	1.3361	1.2244	1.1409	1.0834	1.0412	1.0165	0.9924
gt;MAE06740 LD-carboxypeptidase A	113	2446	3.3217	3.3705	1.0772	1.2055	0.9991	1.0362	0.999	1.0209	1.0008	1.0176	1.0011	1.0166	1.0012	1.0164	1.002
gt;MAE00560 transposase	276	2446	31.9441	26.035	11.6649	9.4338	6.5115	5.4498	4.4533	3.893	3.4238	3.098	2.8299	2.6197	2.4471	2.3026	2.1827
gt;MAE40760 unknown protein	78	2444	1.6628	1.9489	0.9327	1.0339	0.9614	0.9699	0.9538	0.9525	0.9452	0.9413	0.9329	0.9316	0.9236	0.9206	0.9178
gt;MAE41910 hypothetical protein	170	2442	6.3148	4.3164	1.0593	1.6984	0.7415	1.2779	0.7461	1.1077	0.7582	1.0042	0.7636	0.9239	0.7565	0.8597	0.7395
gt;MAE28370 hypothetical protein	155	2442	8.5735	7.1448	1.9722	1.7193	1.1627	1.1083	1.015	0.9994	0.9792	0.972	0.9594	0.9512	0.9408	0.93	0.9186
gt;MAE03270 transposase	274	2442	28.0113	22.6859	8.4797	6.7527	3.9918	3.2257	2.3711	2.001	1.6676	1.4795	1.3258	1.227	1.148	1.0941	1.0464
gt;MAE44980 hypothetical protein	139	2440	7.0514	5.306	1.5801	1.4904	1.0699	1.0781	0.9971	1.0006	0.9815	0.9839	0.978	0.9766	0.9753	0.9745	0.9743
gt;MAE13920 serine acetyltransferase	134	2438	5.2961	5.2032	1.4886	1.4625	1.0755	1.0614	0.9975	0.9947	0.9774	0.974	0.9671	0.9641	0.9591	0.9574	0.9528
gt;MAE28330 FAD dependent oxidoreductase	155	2438	8.095	5.81	1.6925	1.6269	1.1201	1.1421	1.0438	1.0646	1.0434	1.0551	1.0493	1.0555	1.0537	1.0563	1.055
gt;MAE56410 hypothetical protein	203	2438	15.4416	13.7497	4.711	3.7955	2.2989	1.9144	1.5148	1.3515	1.2091	1.1312	1.0677	1.0287	0.9993	0.9792	0.9614
gt;MAE18950 hypothetical protein	128	2436	6.9825	5.2571	1.6785	1.5382	1.1336	1.0903	1.0055	0.9795	0.9481	0.9251	0.9049	0.8897	0.8697	0.8548	0.8413
gt;MAE12250 two-component hybrid histidine kinase	168	2436	9.8411	7.7769	2.3006	2.1113	1.308	1.2836	1.0892	1.0922	1.0219	1.0307	1.0014	1.0071	0.9908	0.9952	0.9842
gt;MAE54470 principal RNA polymerase sigma factor SigA	220	2436	17.7575	15.3393	4.7947	3.7344	2.1301	1.753	1.3804	1.2371	1.1235	1.0602	1.0123	0.9812	0.9536	0.9298	0.9074
gt;MAE18910 water-soluble carotenoid protein	133	2434	5.5816	4.4019	1.3758	1.4177	1.0368	1.09	0.9964	1.0205	0.9901	0.9986	0.987	0.9883	0.984	0.9835	0.9814
gt;MAE25400 diaminopimelate decarboxylase	191	2432	10.8163	8.8297	2.474	2.4769	1.4123	1.5018	1.1676	1.2267	1.0868	1.1171	1.0523	1.0658	1.0357	1.0403	1.0233
gt;MAE60610 hypothetical protein	115	2430	4.761	3.8552	1.234	1.2263	0.9827	0.973	0.9228	0.908	0.8824	0.8657	0.8455	0.8326	0.8211	0.8122	0.803
gt;MAE23070 Fe-S cluster assembly protein SufD	180	2430	9.5907	9.5502	2.6633	2.4788	1.5052	1.4055	1.1892	1.1506	1.0867	1.0684	1.0447	1.0376	1.0273	1.0239	1.0192
gt;MAE18150 UDP-glucose dehydrogenase	209	2430	14.4473	11.7056	3.7109	3.2568	1.889	1.7528	1.3612	1.3127	1.1722	1.1553	1.0946	1.0931	1.0631	1.0648	1.0469
gt;MAE60910 peptidase C14, caspase catalytic subunit P20	348	2430	40.7038	37.0449	16.5127	14.3664	9.5962	8.376	6.6449	5.9233	5.1224	4.6676	4.2236	3.9184	3.6414	3.4252	3.2358
gt;MAE50070 selenide water dikinase	140	2428	6.0528	5.3808	1.4483	1.5135	1.078	1.09	1.0124	1.0157	0.9876	0.9854	0.9739	0.9725	0.9669	0.9653	0.9629
gt;MAE42550 putative glycosyl transferase	135	2428	8.5226	5.8974	1.9603	1.5686	1.1616	1.0676	0.9949	0.9657	0.9416	0.9287	0.9156	0.9014	0.8899	0.8826	0.8757
gt;MAE30760 unknown protein	434	2428	56.2448	53.028	25.7516	23.0521	16.3633	14.6329	11.9874	10.8899	9.5401	8.8053	8.0024	7.4859	6.9578	6.5812	6.2118
gt;MAE35070 glycogen operon protein GlgX homolog	300	2424	27.2016	23.9199	8.2876	7.3216	4.1249	3.5507	2.5455	2.2234	1.825	1.6458	1.4637	1.3619	1.2662	1.2073	1.1559
gt;MAE23890 hypothetical protein	127	2422	4.811	4.4342	1.2499	1.387	1.0031	1.0602	0.9729	0.9977	0.9652	0.9763	0.9602	0.9664	0.9575	0.9605	0.9544
gt;MAE19780 hypothetical protein	180	2420	15.0181	10.7253	3.6329	2.6909	1.6949	1.4156	1.1846	1.083	1.0066	0.9632	0.9355	0.9155	0.8977	0.8831	0.8734
gt;MAE57810 hypothetical protein	209	2418	15.8148	11.9077	3.8298	3.1801	1.8924	1.6561	1.3281	1.2326	1.1311	1.0882	1.0459	1.0278	1.0086	0.9986	0.9848
gt;MAE46670 transposase	164	2416	8.5545	8.3316	2.2019	2.082	1.2554	1.2309	1.0449	1.0257	0.9695	0.9614	0.9413	0.9357	0.929	0.926	0.9213
gt;MAE54980 tRNA uridine 5-carboxymethylaminomethyl modification enzyme GidA	308	2416	31.7532	24.6041	9.2447	7.6661	4.358	3.7809	2.6636	2.3882	1.9203	1.7685	1.5455	1.4582	1.3411	1.2887	1.22
gt;MAE34650 hypothetical protein	123	2414	7.4785	5.475	1.9284	1.5463	1.193	1.1138	1.0571	1.0401	1.0292	1.0287	1.0308	1.0351	1.0404	1.0475	1.0575
gt;MAE31780 N-acetylornithine aminotransferase	185	2412	10.1948	7.3662	2.0718	1.9531	1.2503	1.2477	1.1048	1.1137	1.0797	1.0926	1.0872	1.0986	1.0983	1.1088	1.1111
gt;MAE03810 unknown protein	180	2410	10.9592	9.7601	2.8606	2.5697	1.5316	1.4117	1.1652	1.1109	1.0366	1.0109	0.9844	0.9725	0.9597	0.9527	0.9477
gt;MAE40650 hypothetical protein	180	2410	11.6799	9.5686	2.9591	2.7558	1.5419	1.5628	1.193	1.2297	1.0913	1.1152	1.0618	1.0763	1.0551	1.0609	1.0526
gt;MAE42570 transposase	276	2410	32.8951	28.0963	12.9574	10.8923	7.6685	6.6088	5.4712	4.8831	4.3428	3.9881	3.6778	3.4424	3.241	3.0719	2.9307
gt;MAE23590 GTP-binding protein TypA/BipA homolog	272	2404	25.2286	19.8796	7.1011	5.8161	3.3435	2.7991	2.0533	1.7966	1.5172	1.389	1.2662	1.2051	1.1473	1.1173	1.0895
gt;MAE24500 hypothetical protein	130	2402	5.7807	5.1883	1.5344	1.3891	1.0829	1.0516	1.0147	1.0099	1.0041	1.0055	1.0066	1.0086	1.0104	1.014	1.017
gt;MAE53430 arginine biosynthesis bifunctional protein ArgJ	158	2402	6.6531	6.7228	1.8465	1.9448	1.2244	1.2625	1.0778	1.0916	1.0348	1.0472	1.0242	1.0307	1.0232	1.0281	1.0228
gt;MAE10910 DegT/DnrJ/EryC1/StrS aminotransferase family enzyme	171	2402	8.4514	8.774	2.619	2.6987	1.684	1.6573	1.3616	1.3275	1.2161	1.1911	1.1416	1.1268	1.0988	1.0915	1.0748
gt;MAE23140 probable glycosyl transferase	158	3938	13.8071	10.7403	7.0526	5.2791	2.0328	1.1308	1.11	1.1698	1.1823	1.224	1.2471	1.2728	1.2961	1.3199	1.3382
gt;MAE16280 uridine phosphorylase	118	2400	5.6065	4.8857	1.4951	1.43	1.0686	1.05	0.9809	0.971	0.9502	0.9458	0.9386	0.9353	0.9312	0.9246	0.9195
gt;MAE45860 1,4-dihydroxy-2-naphthoate synthase	124	2400	5.8572	4.604	1.4447	1.308	1.0402	1.0093	0.9717	0.9652	0.9552	0.9507	0.9453	0.9406	0.9366	0.9331	0.9304
gt;MAE25420 conserved hypothetical protein	134	2400	6.3595	5.144	1.4986	1.4732	1.0826	1.0707	1.0013	0.9986	0.9822	0.9803	0.9733	0.9715	0.9688	0.9671	0.9652
gt;MAE50360 hypothetical protein	196	2398	14.7653	11.3518	3.5848	2.7806	1.6968	1.4453	1.2126	1.1263	1.0634	1.0337	1.0125	1.0023	0.9952	0.9919	0.9895
gt;MAE48380 universal stress protein	123	2396	4.9865	4.1215	1.2278	1.2917	1.0111	1.0327	0.988	0.9909	0.9839	0.9837	0.9827	0.9827	0.9825	0.9825	0.9825
gt;MAE28510 rhodanese-like domain-containing protein	130	2396	6.8038	5.2552	1.6	1.4439	1.0791	1.031	0.9692	0.9512	0.9337	0.9229	0.9133	0.9049	0.8959	0.8882	0.8827
gt;MAE01790 hypothetical protein	143	2394	7.516	5.8525	1.688	1.4634	1.0924	1.0425	0.9732	0.951	0.9237	0.9072	0.8895	0.8766	0.8645	0.8541	0.8451
gt;MAE53040 major facilitator superfamily protein	126	2392	3.0235	3.6508	0.9197	1.4531	0.9277	1.1693	0.9979	1.119	1.0552	1.1218	1.0984	1.14	1.1393	1.1692	1.1742
gt;MAE46400 glycosyl transferase family 2	154	2392	5.7407	6.4287	1.474	1.8461	1.0929	1.2076	1.0273	1.0695	1.0136	1.0305	1.0085	1.0194	1.0074	1.0165	1.0062
gt;MAE13220 putative glycosyl transferase	176	2392	9.8632	8.9794	2.5601	2.3491	1.4287	1.3468	1.1422	1.1155	1.0595	1.0522	1.0353	1.0362	1.0301	1.0328	1.0287
gt;MAE46090 transposase	220	2392	15.8641	14.8545	4.6266	3.928	2.278	1.9481	1.5212	1.3679	1.2214	1.1485	1.0932	1.0613	1.0348	1.0176	1.0057
gt;MAE03470 putative calcium binding hemolysin protein	265	2392	18.1718	18.4695	5.4237	5.8494	2.9076	3.0301	1.9989	2.0109	1.5816	1.561	1.3634	1.349	1.2511	1.2384	1.1929
gt;MAE50690 D-3-phosphoglycerate dehydrogenase	243	2392	19.7548	15.0151	4.878	4.2094	2.3377	2.0992	1.5539	1.4443	1.2513	1.1983	1.1244	1.0984	1.063	1.0512	1.0368
gt;MAE20830 peptidase M16-like	182	2390	10.2892	9.6763	2.6058	2.3582	1.4023	1.3062	1.1083	1.0727	1.0277	1.0158	1.004	1.0008	0.9949	0.9939	0.9907
gt;MAE30620 periplasmic protease HhoA	152	2386	8.0488	5.6743	1.6053	1.6949	1.109	1.1668	1.0297	1.0532	1.0138	1.021	1.0105	1.0126	1.0093	1.0101	1.0094
gt;MAE57920 hypothetical protein	141	2386	8.2766	6.9727	2.1669	1.8461	1.2793	1.2001	1.0948	1.0725	1.0513	1.047	1.0461	1.0502	1.0545	1.0605	1.0685
gt;MAE15700 hypothetical protein	310	2386	30.6371	24.02	9.2289	7.8453	4.4665	3.9992	2.7272	2.5609	1.9465	1.8882	1.5583	1.5401	1.3502	1.3452	1.2334
gt;MAE10620 transposase	277	2386	31.985	26.4215	11.7119	9.5563	6.5168	5.4749	4.4345	3.8789	3.3985	3.0753	2.8018	2.5949	2.4175	2.2726	2.1459
gt;MAE62060 cell division protein FtsH	243	2384	14.4236	14.0271	3.8602	4.3353	1.9959	2.4002	1.4687	1.7271	1.2668	1.4259	1.182	1.283	1.1455	1.211	1.1314
gt;MAE11300 2-hydroxyhepta-2,4-diene-1,7-dioate isomerase	110	2382	3.5346	3.7058	1.1238	1.2165	0.9843	1.0004	0.9634	0.9654	0.9507	0.947	0.9351	0.9296	0.9247	0.9207	0.9152
gt;MAE30020 fructose-1,6-/sedoheptulose-1,7-bisphosphatase	151	2382	6.7175	5.5627	1.4403	1.6431	1.0411	1.1599	0.9996	1.0541	0.9984	1.0258	1.0041	1.0154	1.005	1.0136	1.0054
gt;MAE62240 UDP-N-acetylglucosamine 1-carboxyvinyltransferase	192	2380	12.995	8.6382	2.6031	2.6424	1.395	1.6127	1.1509	1.3002	1.0958	1.1842	1.0846	1.1361	1.0886	1.1176	1.0926
gt;MAE60280 hypothetical protein	158	2378	7.6635	8.1539	2.1446	2.0369	1.2803	1.213	1.0555	1.0187	0.9719	0.949	0.9267	0.91	0.8926	0.8817	0.8712
gt;MAE01980 aldehyde dehydrogenase	178	2378	11.5854	7.9895	2.5044	2.1699	1.3673	1.3074	1.1309	1.1286	1.0889	1.0991	1.0895	1.1034	1.1037	1.1184	1.1213
gt;MAE27600 transposase	276	2378	29.683	24.4446	9.8489	7.9761	5.0211	4.1208	3.1442	2.6766	2.2509	1.9907	1.774	1.6197	1.4939	1.3976	1.3178
gt;MAE62180 hypothetical protein	148	2374	8.8685	6.3386	2.034	1.6696	1.1845	1.104	1.0238	1.0037	0.9864	0.981	0.9789	0.9768	0.976	0.9758	0.9752
gt;MAE62430 FkbM family methyltransferase	153	2374	9.0113	6.6151	1.9699	1.6187	1.1494	1.0688	0.9924	0.9726	0.9582	0.9538	0.95	0.9488	0.9469	0.9459	0.945
gt;MAE51800 transposase	138	2370	7.9025	6.0098	1.8502	1.5715	1.1379	1.0799	1.0082	0.9938	0.9735	0.9644	0.9514	0.9445	0.9371	0.9322	0.9241
gt;MAE13250 aminopeptidase P	218	2370	20.7239	15.3503	5.6997	4.6359	2.7616	2.4306	1.8112	1.6725	1.4124	1.3414	1.215	1.17	1.102	1.074	1.0373
gt;MAE16000 2-phosphosulfolactate phosphatase	114	2368	4.2426	4.2046	1.2449	1.3131	1.0201	1.0376	0.9769	0.9807	0.9489	0.9418	0.9151	0.9064	0.8891	0.8814	0.8702
gt;MAE42850 methionyl-tRNA synthetase	242	2368	21.6711	17.231	6.3996	5.0912	3.1086	2.5432	1.9492	1.6868	1.4621	1.3384	1.2383	1.1762	1.1301	1.0991	1.0725
gt;MAE02000 hypothetical protein	101	2364	2.8306	2.4542	0.8834	1.1874	0.9235	1.068	0.9695	1.0401	0.9928	1.0277	1.0048	1.0223	1.0118	1.0226	1.016
gt;MAE49190 hypothetical protein	175	2364	3.5282	2.9104	0.5249	1.5589	0.464	1.2999	0.5105	1.1365	0.5487	1.0092	0.5564	0.9009	0.5476	0.8036	0.5251
gt;MAE29470 hypothetical protein	223	2364	14.0741	12.7698	3.5842	3.5925	1.8918	1.92	1.4081	1.4093	1.2152	1.2137	1.1262	1.1263	1.0831	1.084	1.0608
gt;MAE24260 photosystem II oxygen-evolving complex 23K protein PsbP	84	2362	2.7941	2.7137	1.0767	1.1531	1.0272	1.0703	1.0709	1.106	1.1254	1.1413	1.1485	1.1533	1.1551	1.1566	1.1568
gt;MAE45150 hypothetical protein	270	2362	20.5944	20.8102	6.8599	6.3968	3.5624	3.1926	2.3049	2.0666	1.7194	1.5779	1.4204	1.3389	1.2598	1.2138	1.1694
gt;MAE61840 ClpB protein	429	2360	58.3013	56.7382	28.1997	25.5882	18.4403	16.62	13.7644	12.5605	11.0742	10.2446	9.3395	8.7357	8.1243	7.6744	7.2309
gt;MAE19100 chorismate synthase	164	2358	9.4113	8.2427	2.443	2.0045	1.3306	1.1946	1.0654	1.0194	0.9807	0.9624	0.9459	0.9353	0.9239	0.9156	0.9058
gt;MAE29000 hypothetical protein	184	2358	14.0969	10.7704	3.3808	2.655	1.633	1.4088	1.181	1.0927	1.0128	0.9691	0.9344	0.9064	0.8885	0.8703	0.8561
gt;MAE23480 DNA mismatch repair protein MutS	379	2358	44.3233	43.1841	20.359	19.1927	13.3769	12.2534	9.9332	9.0855	7.9024	7.2885	6.5848	6.13	5.6767	5.3384	5.0152
gt;MAE09710 type IV pilus assembly protein PilM	169	2356	10.431	8.7478	2.6324	2.2693	1.4247	1.3055	1.1063	1.0585	1.0006	0.9794	0.9594	0.9485	0.9426	0.9399	0.9374
gt;MAE14800 nitrate transport protein nrtA	207	2356	15.9758	10.3248	3.456	3.009	1.6707	1.691	1.2386	1.3049	1.1195	1.1705	1.0858	1.1208	1.0789	1.1081	1.0844
gt;MAE35660 hypothetical protein	262	2356	25.7326	20.5602	7.6372	6.2494	3.6856	3.079	2.2747	1.9802	1.6581	1.5004	1.3518	1.2658	1.1887	1.1411	1.102
gt;MAE22160 two-component response regulator OmpR subfamily	115	2354	5.4449	4.2359	1.3531	1.3051	1.0206	1.0023	0.9484	0.9325	0.9085	0.8954	0.8851	0.8771	0.8708	0.8639	0.8577
gt;MAE15380 ABC-transporter ATP-binding protein	237	2354	16.0052	13.8841	4.3126	4.0662	2.2897	2.161	1.6322	1.5494	1.3518	1.3064	1.221	1.1953	1.1561	1.1437	1.1231
gt;MAE24680 hypothetical protein	386	2354	44.7884	41.7065	19.0228	17.2227	11.6835	10.6227	8.4335	7.7921	6.6915	6.2646	5.6259	5.3164	4.9017	4.6668	4.385
gt;MAE28680 tetratricopeptide repeat protein	106	2352	4.4267	3.9115	1.2635	1.2582	1.0312	1.057	1.0328	1.0492	1.0551	1.0738	1.0912	1.1115	1.1341	1.1582	1.1792
gt;MAE06400 3-hydroxyacid dehydrogenase	122	2350	5.3075	4.6422	1.3427	1.3861	1.0241	1.0478	0.9771	0.9906	0.9604	0.9688	0.9498	0.9488	0.9406	0.9372	0.9333
gt;MAE21720 putative cystein protease	134	2350	7.5253	4.861	1.451	1.4696	1.02	1.0816	0.9713	0.9995	0.9674	0.9787	0.9639	0.9715	0.963	0.9695	0.9623
gt;MAE28200 transposase	142	2350	9.4956	7.0208	2.146	1.744	1.2043	1.1422	1.0451	1.043	1.0162	1.0247	1.0168	1.0295	1.0287	1.0415	1.0444
gt;MAE35020 pentapeptide repeat family protein	268	2350	27.6061	23.3993	9.2175	7.4029	4.4879	3.6771	2.7286	2.3365	1.9432	1.735	1.5486	1.4273	1.3238	1.2517	1.1905
gt;MAE49200 glycosyl transferase family 2	137	2348	5.1581	4.8395	1.3643	1.428	1.0519	1.0829	1.0221	1.0402	1.0313	1.0423	1.0432	1.0504	1.0528	1.0582	1.0606
gt;MAE46270 D-alanyl-D-alanine carboxypeptidase/D-alanyl-D-alanine-endopeptidase	188	2348	9.5427	9.6728	2.5814	2.8294	1.5579	1.6263	1.2604	1.2714	1.1417	1.1367	1.0802	1.0716	1.047	1.0389	1.0268
gt;MAE40180 hypothetical protein	189	2346	11.5996	10.3329	3.1546	2.591	1.6384	1.4359	1.2295	1.1573	1.1001	1.0732	1.0546	1.0471	1.042	1.0394	1.0382
gt;MAE34290 transposase	226	2346	15.9017	14.2364	4.3642	4.0461	2.167	2.1049	1.5013	1.4827	1.2388	1.2291	1.121	1.1144	1.0666	1.0636	1.0414
gt;MAE06550 hypothetical protein	260	2344	19.6477	16.4292	5.55	5.0887	2.8753	2.643	1.9226	1.8036	1.511	1.4422	1.3124	1.2761	1.2142	1.1975	1.1656
gt;MAE08410 glycosidase-like protein	320	2344	30.1714	25.9064	9.5605	8.7014	4.9934	4.4497	3.1749	2.8286	2.2892	2.0735	1.8144	1.6755	1.5361	1.4487	1.3637
gt;MAE60650 hypothetical protein	77	2342	1.9094	2.0102	1.0028	1.0627	1.0269	1.0502	1.0625	1.0861	1.1053	1.1313	1.1464	1.1577	1.1621	1.1637	1.1644
gt;MAE39230 hypothetical protein	146	2342	7.766	7.44	2.1425	2.0017	1.2926	1.2362	1.0825	1.0614	1.0191	1.0081	0.9961	0.9924	0.9866	0.9846	0.9824
gt;MAE07890 HEAT domain protein repeat-containing protein	362	2342	35.185	31.2655	11.8849	11.8818	6.9745	6.9343	5.0095	4.9163	3.9882	3.8852	3.3851	3.2818	2.9868	2.8927	2.7033
gt;MAE46320 metallophosphoesterase	140	2340	6.8121	4.9553	1.462	1.5126	1.0651	1.1119	1.0184	1.0393	1.0157	1.0224	1.0137	1.018	1.0144	1.017	1.0144
gt;MAE42470 polysaccharide export ABC-transporter ATP-binding protein	151	2340	8.7432	7.9687	2.3248	1.9511	1.3054	1.2091	1.1059	1.088	1.078	1.0824	1.0928	1.1053	1.1192	1.1385	1.1572
gt;MAE49910 nucleotide-diphospho-sugar transferases superfamily	162	2340	8.7897	7.9602	2.2152	2.0287	1.288	1.2344	1.0715	1.0528	1.0064	0.9948	0.975	0.9676	0.9553	0.9494	0.9435
gt;MAE11800 hypothetical protein	158	2338	8.7872	7.2652	2.0096	1.8265	1.1929	1.1459	1.0235	1.0028	0.9711	0.9642	0.9496	0.9432	0.9353	0.9302	0.9267
gt;MAE28050 glucose-1-phosphate adenylyltransferase	188	2338	13.4912	10.3298	3.2878	2.4556	1.5533	1.3207	1.1474	1.0819	1.0415	1.0291	1.0188	1.0193	1.0135	1.0166	1.0127
gt;MAE32190 similar to polyA polymerase	426	2338	48.4107	45.1314	19.8566	19.479	12.5328	12.305	9.319	9.138	7.5381	7.3859	6.3995	6.2744	5.6133	5.5069	5.0464
gt;MAE43240 sulfatase-modifying factor 1 precursor	398	2334	43.0765	41.8949	19.0446	18.15	12.1061	11.4086	8.8724	8.3935	7.0551	6.7187	5.9056	5.6517	5.1201	4.9132	4.5418
gt;MAE02740 precorrin-2 methyltransferase (EC 2.1.1.130)	101	2332	3.4897	3.0676	1.0189	1.2434	0.9511	1.0247	0.9387	0.9577	0.9184	0.918	0.899	0.8992	0.8931	0.8926	0.892
gt;MAE17370 hypothetical protein	231	2330	12.9841	10.4595	2.8029	2.8484	1.364	1.6359	1.0656	1.289	1.0084	1.1635	1.0109	1.1179	1.0321	1.1072	1.058
gt;MAE60420 TPR repeat protein	287	2328	26.5275	21.6453	7.5609	6.4184	3.5798	3.1071	2.2003	1.9754	1.6143	1.501	1.3372	1.2761	1.1956	1.1631	1.1176
gt;MAE37710 ATPase GET3	261	2324	21.364	16.7161	5.6219	5.1827	2.8323	2.6924	1.9085	1.8241	1.4967	1.4448	1.2938	1.2604	1.1854	1.1645	1.1218
gt;MAE28705 hypothetical protein	107	2322	3.1406	2.8777	0.9163	1.3104	0.9316	1.1234	0.9934	1.0979	1.0396	1.1029	1.0817	1.1192	1.1107	1.1362	1.1368
gt;MAE41990 dolichyl-phosphate-mannose synthase	176	2322	8.4329	9.1011	2.3494	2.5205	1.3964	1.4527	1.1383	1.1602	1.0471	1.0625	1.0197	1.0315	1.0108	1.0215	1.0095
gt;MAE58470 hypothetical protein	162	2322	12.8765	8.8276	3.1364	2.3359	1.5373	1.309	1.1284	1.0494	0.9941	0.9665	0.9413	0.9298	0.9194	0.9142	0.9099
gt;MAE59120 hypothetical protein	88	2320	2.8233	2.5056	1.0614	1.0714	0.9871	0.984	0.9692	0.9599	0.9462	0.9328	0.9191	0.9021	0.8879	0.8756	0.8645
gt;MAE04140 hypothetical protein	374	2320	38.9836	35.0958	14.614	13.7942	8.7195	8.1874	6.1787	5.8161	4.8201	4.5605	3.9921	3.8009	3.4415	3.2954	3.0581
gt;MAE03000 cell envelope-related transcriptional attenuator	206	2318	16.8451	11.8324	3.8707	3.1018	1.7988	1.6178	1.2724	1.2202	1.101	1.0838	1.0397	1.0283	1.0122	1.0036	0.9967
gt;MAE28740 hypothetical protein	78	2316	1.9616	2.0432	0.9787	1.0696	1.0103	1.0359	1.042	1.0641	1.0779	1.0966	1.1117	1.1358	1.1562	1.172	1.1808
gt;MAE58950 probable glycosyl transferase	230	2316	13.0717	9.804	2.7029	2.7819	1.2742	1.616	0.9973	1.2773	0.9542	1.1438	0.9598	1.0752	0.9594	1.0307	0.9554
gt;MAE10970 hypothetical protein	99	2314	2.4996	2.6257	0.956	1.1421	0.9737	1.0299	0.9996	1.0108	1.0077	1.0088	1.0086	1.0092	1.0091	1.0091	1.0092
gt;MAE50600 4Fe-4S ferredoxin, iron-sulfur binding protein	147	2314	5.991	5.5433	1.4583	1.5386	1.069	1.0916	1.0088	1.018	1.0018	1.0032	1.0007	1.0004	0.9991	0.999	0.9986
gt;MAE13110 unknown protein	175	2314	10.3693	9.8783	2.7808	2.611	1.5165	1.4642	1.1751	1.1429	1.0395	1.0185	0.9767	0.9599	0.94	0.93	0.9181
gt;MAE01740 histidyl-tRNA synthetase	215	2314	20.281	16.1414	5.9427	4.8988	3.0279	2.5933	2.0388	1.8234	1.6031	1.4872	1.3795	1.311	1.2512	1.2099	1.1743
gt;MAE33600 hypothetical protein	148	2312	7.3074	6.9536	1.8031	1.8473	1.1429	1.1469	0.9882	0.9762	0.9328	0.927	0.9011	0.8926	0.8757	0.8677	0.8547
gt;MAE48990 MazG protein homolog	136	2312	9.7583	6.2335	2.2374	1.7095	1.2398	1.1107	1.005	0.9612	0.9248	0.9043	0.8876	0.8789	0.8708	0.8639	0.8587
gt;MAE17780 tryptophan synthase beta subunit	187	2312	13.718	10.79	3.4487	2.7856	1.7107	1.4886	1.2321	1.1462	1.068	1.0343	1.0057	0.9905	0.9789	0.9732	0.9692
gt;MAE05070 transposase	194	2310	13.946	12.3876	3.8349	3.0854	1.8166	1.5423	1.2516	1.1463	1.056	1.0099	0.9762	0.9569	0.9401	0.9285	0.9204
gt;MAE16540 transposase	212	2310	18.9767	16.5344	5.7935	4.5273	2.7022	2.2006	1.717	1.5213	1.3624	1.2829	1.2304	1.1986	1.1784	1.1656	1.1589
gt;MAE26780 lysyl-tRNA synthetase	248	2310	23.6666	19.2238	7.5438	6.0733	3.878	3.2025	2.5152	2.1766	1.8838	1.6984	1.5452	1.4374	1.352	1.2862	1.2335
gt;MAE38660 McyJ protein	131	2302	5.9107	5.2055	1.5205	1.411	1.0613	1.0307	0.9764	0.9608	0.9407	0.929	0.9171	0.9076	0.8968	0.8904	0.8835
gt;MAE38040 transposase	159	2296	9.2126	8.0889	2.471	2.2313	1.4005	1.3223	1.1236	1.0982	1.0368	1.0288	1.0075	1.0086	0.9997	1.0014	0.9979
gt;MAE60550 hypothetical protein	183	2296	13.4379	10.792	3.3786	2.6735	1.6227	1.4227	1.1936	1.1354	1.0775	1.0596	1.0427	1.0379	1.0313	1.03	1.0278
gt;MAE33390 hypothetical protein	296	2294	28.1122	24.5941	9.5105	8.3347	5.1311	4.4358	3.3515	2.9296	2.4599	2.1979	1.9489	1.7865	1.6455	1.5448	1.4548
gt;MAE09290 transposase	119	2292	5.075	5.0676	1.4571	1.4371	1.0569	1.0473	0.9813	0.9667	0.9412	0.9267	0.9068	0.8932	0.88	0.8706	0.8625
gt;MAE42710 serine/threonine kinase	222	2292	19.8192	17.4256	6.4345	5.1146	3.1557	2.5579	1.9817	1.7019	1.4769	1.335	1.2351	1.1648	1.1154	1.0777	1.0494
gt;MAE23360 hypothetical protein	98	2290	3.9896	3.3335	1.2191	1.1588	0.989	0.9615	0.9265	0.9054	0.885	0.8671	0.8516	0.8404	0.8308	0.823	0.8173
gt;MAE56360 cobyric acid synthase like	108	2290	4.4084	3.749	1.2959	1.2019	1.0279	1.0074	0.9835	0.976	0.9653	0.9572	0.948	0.9396	0.9299	0.9253	0.9173
gt;MAE42400 hypothetical protein	171	2288	10.1174	7.3829	2.2111	1.9147	1.2487	1.2067	1.068	1.065	1.0268	1.0319	1.0194	1.0237	1.0188	1.0221	1.0183
gt;MAE19740 two-component sensor histidine kinase	299	2288	21.0256	16.2139	5.2546	5.2058	2.4798	2.7551	1.5932	1.8489	1.2386	1.4183	1.0624	1.1913	0.9615	1.0519	0.8979
gt;MAE13100 probable glycosyl transferase	275	2288	25.9858	22.885	8.5255	7.2455	4.2946	3.6274	2.6638	2.3077	1.9074	1.7161	1.5249	1.4141	1.3151	1.2511	1.1979
gt;MAE06730 chaperon-like protein for quinone binding in photosystem II	132	2286	6.6907	4.9692	1.5091	1.4274	1.0478	1.0759	1.0099	1.0349	1.0192	1.0352	1.0302	1.0378	1.0392	1.0417	1.0444
gt;MAE40660 hypothetical protein	113	2284	5.3506	5.3128	1.5684	1.5823	1.1098	1.1191	1.0289	1.0388	1.0194	1.0272	1.0285	1.0387	1.0478	1.0584	1.0685
gt;MAE06900 fumarase	183	2284	10.6329	9.479	2.534	2.313	1.3743	1.3119	1.1167	1.1	1.0472	1.0408	1.0222	1.0162	1.01	1.0039	1.0026
gt;MAE08240 hypothetical protein	227	2284	16.983	12.8454	4.1155	3.3058	1.9022	1.6622	1.3047	1.2343	1.1223	1.0988	1.0645	1.0552	1.0439	1.0423	1.0384
gt;MAE52300 proline oxidase	436	2282	52.1658	51.9017	23.2855	23.1835	15.1754	14.7908	11.3592	10.9625	9.1641	8.8094	7.7378	7.4287	6.7463	6.481	6.0148
gt;MAE42530 mercuric reductase	184	2280	13.5641	10.083	3.3119	2.7585	1.6774	1.5065	1.2373	1.1824	1.1003	1.0832	1.0565	1.0517	1.0412	1.0441	1.0414
gt;MAE54930 hypothetical protein	244	2280	20.3562	18.0024	5.7558	4.979	2.76	2.3959	1.7776	1.5914	1.3706	1.2744	1.1734	1.1164	1.0644	1.0289	0.9984
gt;MAE61330 urease alpha subunit	254	2280	22.2397	19.32	6.7559	5.616	3.2882	2.7049	2.0215	1.7396	1.4854	1.3504	1.2395	1.1692	1.1224	1.0911	1.0673
gt;MAE60940 N-acetylmuramoyl-L-alanine amidase	225	2278	19.2271	15.3085	5.288	4.3874	2.5561	2.1982	1.6778	1.5129	1.3264	1.2501	1.1694	1.1285	1.0909	1.0696	1.0528
gt;MAE55670 GHMP kinase	125	2270	4.9418	5.2282	1.4126	1.583	1.071	1.1067	1.0053	1.0172	0.9906	0.9948	0.9867	0.9894	0.9857	0.9886	0.9847
gt;MAE26220 unknown protein	132	2270	5.4004	5.7794	1.4421	1.7381	1.0659	1.1856	1.0032	1.066	0.9879	1.0373	0.9862	1.0274	0.9842	1.0224	0.9835
gt;MAE28300 DNA repair protein RecN	248	2270	21.527	18.7512	6.4124	5.8702	3.3354	2.9967	2.1741	1.9674	1.633	1.5025	1.348	1.2681	1.1876	1.1413	1.1003
gt;MAE40800 unknown protein	66	2268	1.5473	1.7321	0.9493	1.0102	0.9488	0.9464	0.933	0.929	0.9262	0.9256	0.9252	0.9252	0.9252	0.9252	0.9252
gt;MAE45750 PmbA protein homolog	180	2268	11.0509	9.5662	2.7078	2.4489	1.4736	1.3558	1.1414	1.0891	1.0296	1.0072	0.9898	0.9819	0.9765	0.9739	0.9712
gt;MAE14900 NADH-dependent glutamate synthase small subunit	207	2268	15.4484	12.4436	3.9761	3.3684	1.9779	1.7391	1.3811	1.2801	1.167	1.1237	1.0792	1.0588	1.0414	1.0326	1.0228
gt;MAE26800 AAA famiry ATPase central region	226	2268	19.9757	15.341	5.7721	4.8817	2.9517	2.5777	1.9527	1.7601	1.5043	1.4001	1.2769	1.2195	1.1547	1.1205	1.0834
gt;MAE22170 hypothetical protein	87	2266	1.981	2.1339	0.9193	1.1054	0.9618	1.0295	0.9876	1.0227	1.0022	1.0248	1.0119	1.0274	1.019	1.0312	1.0244
gt;MAE52640 two-component response regulator OmpR subfamily	122	2266	5.1431	4.4967	1.2655	1.41	1.005	1.0299	0.9271	0.9145	0.8773	0.8631	0.8397	0.8256	0.8115	0.8033	0.7963
gt;MAE62280 unknown protein	129	2266	9.3871	6.2766	2.2104	1.696	1.2753	1.1761	1.1191	1.1157	1.1176	1.1308	1.1433	1.1582	1.1645	1.1697	1.172
gt;MAE56340 transposase	220	2266	20.7367	16.7947	6.5586	5.2923	3.3932	2.8265	2.2345	1.9496	1.7032	1.5556	1.4287	1.344	1.2748	1.2242	1.1818
gt;MAE28180 GcpE protein homolog	189	2264	13.7877	11.4288	3.7313	3.078	1.8881	1.6363	1.3457	1.2416	1.1457	1.0996	1.0586	1.0355	1.0165	1.0077	0.9985
gt;MAE30690 hypothetical protein	75	2260	2.543	2.2202	1.0159	1.0537	0.9614	0.9591	0.9382	0.9277	0.9214	0.9187	0.9161	0.9148	0.9142	0.9139	0.9139
gt;MAE05580 GTP-binding protein	217	2258	16.3536	11.976	4.1857	3.6479	2.0548	1.994	1.4205	1.4562	1.2014	1.2481	1.1263	1.165	1.1025	1.1308	1.1032
gt;MAE29670 transposase	236	2258	22.931	20.1113	7.3434	5.9512	3.5476	2.9194	2.2176	1.9253	1.6623	1.5165	1.3988	1.3249	1.2681	1.2272	1.1952
gt;MAE58390 cysteine desulfurase	158	2256	6.8562	5.7848	1.5368	1.7318	1.0977	1.2086	1.0528	1.1091	1.0591	1.0868	1.0717	1.0871	1.0799	1.0902	1.0849
gt;MAE07820 unknown protein	181	2256	9.7498	9.6233	2.466	2.4047	1.401	1.3348	1.1202	1.0855	1.0272	1.0147	0.999	0.9956	0.9882	0.9871	0.9831
gt;MAE40850 hypothetical protein	63	2252	1.3695	1.5369	0.9695	1.0567	1.0459	1.0709	1.0751	1.079	1.081	1.0814	1.0814	1.0814	1.0814	1.0814	1.0814
gt;MAE57830 hypothetical protein	99	2252	2.9999	2.7663	1.0478	1.1009	0.966	0.9714	0.9435	0.9399	0.9214	0.9141	0.8919	0.8825	0.8666	0.8555	0.8415
gt;MAE14210 bidirectional hydrogenase hydrogenase subunit	207	2252	18.6539	14.375	5.452	4.3969	2.8037	2.3694	1.8908	1.6817	1.4874	1.3758	1.281	1.2198	1.1652	1.1297	1.099
gt;MAE30590 pheophorbide a oxygenase	182	2250	13.9126	10.1661	3.3834	2.7876	1.7123	1.5171	1.2439	1.166	1.0764	1.0445	1.0138	1.0014	0.9856	0.9795	0.9717
gt;MAE36080 two-component sensor histidine kinase	293	2250	29.7869	24.974	10.6455	9.305	5.8917	5.2682	3.9557	3.6158	2.9833	2.7706	2.4222	2.2801	2.0724	1.9711	1.8378
gt;MAE29910 GDP-mannose 4,6-dehydratase	172	2248	13.2686	10.638	3.3435	2.6229	1.6137	1.3943	1.1819	1.1067	1.0449	1.017	0.9897	0.9673	0.9468	0.9304	0.9197
gt;MAE12930 phytoene dehydrogenase	210	2248	14.1669	10.7156	3.1243	2.9077	1.6285	1.6034	1.2497	1.2447	1.1242	1.117	1.0661	1.0626	1.0391	1.0364	1.0246
gt;MAE03060 transposase	132	2246	8.994	7.0447	2.2432	1.7625	1.2406	1.1232	1.039	1.0141	1.0005	0.9958	0.9939	0.9935	0.9935	0.9935	0.9935
gt;MAE28360 glycine/betaine transport system permease protein	187	2246	9.018	7.584	1.9408	2.3648	1.1853	1.5083	1.0794	1.2659	1.0809	1.1824	1.0992	1.1597	1.1249	1.1628	1.1488
gt;MAE36370 transposase	200	2246	15.4234	13.4432	4.3746	3.7448	2.1814	1.9164	1.4825	1.3512	1.1915	1.1236	1.0592	1.0205	0.9862	0.9639	0.9447
gt;MAE60570 transposase	179	2246	17.7623	13.5052	5.187	3.8045	2.4347	1.9545	1.5991	1.4259	1.312	1.2474	1.2056	1.1787	1.1617	1.1489	1.1398
gt;MAE43640 glucose 6-phosphate dehydrogenase	230	2244	16.3586	14.9621	4.4982	4.3191	2.3276	2.2403	1.6291	1.5579	1.3254	1.2715	1.1733	1.1335	1.0871	1.065	1.0404
gt;MAE62250 probable tRNA/rRNA methyltransferase	111	2242	4.4497	3.7955	1.2349	1.2476	0.9995	0.9951	0.9507	0.9447	0.9305	0.9211	0.9141	0.9104	0.9077	0.9063	0.9047
gt;MAE47540 transposase	277	2242	31.6176	26.1141	11.0779	8.9136	5.7562	4.7074	3.6287	3.0784	2.5933	2.2798	2.0225	1.8374	1.6848	1.5651	1.4626
gt;MAE44320 glycolate oxidase subunit GlcE	163	2240	8.9184	9.2971	2.5815	2.4054	1.4385	1.3385	1.1287	1.0887	1.0316	1.0144	0.9974	0.9905	0.9833	0.9806	0.9771
gt;MAE54760 hypothetical protein	224	2238	20.4222	16.7738	5.8563	4.5809	2.7077	2.1951	1.6835	1.4635	1.2842	1.1861	1.1102	1.0617	1.0185	0.9941	0.9727
gt;MAE48350 tRNA (5-methylaminomethyl-2-thiouridylate)-methyltransferase (EC 2.1.1.61)	144	2234	8.0816	6.3901	1.8209	1.6683	1.1558	1.1076	1.0231	1.0104	0.9926	0.9881	0.9847	0.9844	0.9835	0.9833	0.9833
gt;MAE21870 type 2 NADH dehydrogenase	173	2234	10.4617	7.5183	2.2057	1.972	1.2676	1.2186	1.0766	1.0687	1.0314	1.0343	1.0231	1.0274	1.02	1.0242	1.0199
gt;MAE39640 ATP-dependent DNA helicase RecQ	206	2232	18.2288	12.9236	4.7299	3.7609	2.3246	2.012	1.59	1.4607	1.2993	1.2332	1.1549	1.1208	1.0798	1.0598	1.0371
gt;MAE62540 unknown protein	126	2228	3.5336	3.5975	0.9962	1.3541	0.9732	1.1147	1.0218	1.0917	1.0667	1.1077	1.1028	1.1251	1.1306	1.1457	1.1549
gt;MAE39830 hypothetical protein	164	2228	9.8041	7.8325	2.3515	2.0022	1.3361	1.2297	1.1038	1.0697	1.0392	1.0291	1.0191	1.0172	1.0145	1.0146	1.0145
gt;MAE47090 hypothetical protein	181	2228	11.2906	11.8497	3.4039	3.0995	1.7752	1.614	1.2973	1.2361	1.1425	1.1213	1.0894	1.0791	1.0673	1.0624	1.0581
gt;MAE27900 dehydrogenase	187	2228	14.128	11.1162	3.5114	2.8261	1.6868	1.4733	1.21	1.1312	1.0524	1.0184	0.9893	0.9763	0.964	0.9569	0.9525
gt;MAE17410 4-hydroxyphenylpyruvate dioxygenase	162	2224	10.5305	8.3852	2.5594	2.2885	1.4321	1.3148	1.1093	1.0546	0.993	0.9685	0.9458	0.9338	0.9237	0.9167	0.9123
gt;MAE37810 methyltransferase type 11	203	2224	19.3439	13.8653	5.0553	3.6759	2.2611	1.8024	1.4421	1.2734	1.1525	1.0808	1.0256	0.9878	0.9585	0.9363	0.9177
gt;MAE11100 unknown protein	176	2222	11.294	10.0333	2.8833	2.5485	1.4893	1.3837	1.1499	1.118	1.0597	1.0524	1.0376	1.037	1.0341	1.0363	1.0348
gt;MAE28080 hypothetical protein	102	2218	2.9213	2.9015	0.9808	1.1715	0.9712	1.0346	0.9972	1.021	1.013	1.0233	1.0213	1.0264	1.0268	1.0286	1.0297
gt;MAE01780 hypothetical protein	170	2218	12.1765	9.4016	3.1114	2.3649	1.5578	1.3516	1.1878	1.1313	1.0902	1.0729	1.0591	1.0559	1.0547	1.0559	1.0586
gt;MAE52620 transposase	214	2218	19.7067	16.1585	5.8074	4.819	2.7723	2.4172	1.7657	1.6104	1.3465	1.2681	1.1445	1.0927	1.0275	0.9941	0.9582
gt;MAE37210 hypothetical protein	121	2216	7.3566	5.449	1.783	1.5844	1.1283	1.0774	0.9803	0.9628	0.9347	0.9214	0.9074	0.8973	0.8883	0.8791	0.871
gt;MAE52940 cyclase	109	2214	3.8623	3.638	1.1668	1.2098	0.989	0.99	0.9494	0.9456	0.9352	0.9332	0.9306	0.9289	0.9285	0.9285	0.9285
gt;MAE03210 two-component sensor histidine kinase	213	2214	14.0022	12.045	3.4368	3.4963	1.6953	1.8954	1.2449	1.3895	1.0922	1.1928	1.0382	1.1089	1.015	1.0672	1.0014
gt;MAE59160 probable glycosyl transferase	170	2212	11.2897	7.9638	2.4357	2.1936	1.3136	1.3143	1.08	1.1026	1.0192	1.0407	1.0028	1.0171	0.9967	1.0071	0.994
gt;MAE45170 transposase	142	2210	7.7133	7.757	2.1254	1.9474	1.2503	1.2013	1.0761	1.0719	1.0584	1.0642	1.0629	1.0651	1.0649	1.0654	1.0652
gt;MAE33500 hypothetical protein	234	2210	19.4632	19.7282	7.0265	6.2441	3.8274	3.3365	2.611	2.3339	2.0415	1.8834	1.7354	1.6363	1.5458	1.4799	1.4231
gt;MAE02010 hypothetical protein	81	2208	1.15	1.8311	0.6909	1.2414	0.8565	1.1281	0.9612	1.0991	1.032	1.1156	1.0879	1.1473	1.1371	1.1809	1.1811
gt;MAE20010 bicarbonate transport system ATP-binding protein	290	2208	27.8004	22.8045	8.7658	7.5506	4.3826	3.8247	2.7247	2.4332	1.9641	1.7985	1.5763	1.4803	1.3655	1.3044	1.2438
gt;MAE35540 hypothetical protein	99	2206	3.7029	3.6165	1.2039	1.2218	1.0397	1.0702	1.0591	1.0892	1.1031	1.1291	1.1483	1.1659	1.1758	1.1808	1.1831
gt;MAE07840 hypothetical protein	122	2206	5.2688	5.1428	1.5047	1.4957	1.0851	1.0702	0.9839	0.9618	0.9264	0.9113	0.8883	0.8774	0.8642	0.8568	0.843
gt;MAE06190 urea transport system ATP-binding protein	112	2202	5.3351	4.5188	1.4339	1.3293	1.0588	1.0379	0.9976	0.9924	0.9853	0.9825	0.9793	0.9749	0.9713	0.9667	0.9626
gt;MAE28440 hypothetical protein	126	2202	7.007	5.7409	1.8119	1.6165	1.1661	1.1077	1.0196	0.9926	0.9634	0.9476	0.93	0.9157	0.8996	0.8828	0.8661
gt;MAE14380 two-component response regulator OmpR subfamily	125	2200	8.0659	5.4571	1.8843	1.5043	1.1424	1.0479	0.9779	0.9389	0.9089	0.8923	0.8795	0.8708	0.8642	0.8585	0.853
gt;MAE26670 hypothetical protein	163	2200	9.8354	6.3416	1.9006	1.987	1.1594	1.3044	1.0375	1.1301	1.0199	1.0763	1.023	1.0578	1.0324	1.0528	1.0398
gt;MAE33410 hypothetical protein	178	2200	10.5307	10.5818	3.0903	3.0314	1.7284	1.6611	1.2992	1.2529	1.1232	1.0994	1.0464	1.0325	1.0094	0.9969	0.9869
gt;MAE20820 hypothetical protein	265	2200	25.5407	23.862	9.0896	7.62	4.6144	3.7862	2.8225	2.3819	1.9864	1.7498	1.5536	1.4183	1.3128	1.2344	1.1732
gt;MAE46660 hypothetical protein	195	2198	12.4698	11.6931	3.4693	3.3298	1.8877	1.867	1.4224	1.4122	1.2295	1.2137	1.121	1.1075	1.0579	1.0451	1.0169
gt;MAE21750 hypothetical protein	76	2196	1.7749	2.0602	0.9562	1.0462	0.9488	0.9616	0.9355	0.9365	0.9224	0.9205	0.9171	0.9164	0.9158	0.9156	0.9156
gt;MAE54270 transposase	99	2196	3.953	3.8605	1.2992	1.2627	1.0608	1.0648	1.0483	1.0618	1.0666	1.0843	1.1004	1.1198	1.1376	1.1583	1.1735
gt;MAE41540 unknown protein	131	2194	2.2984	2.5989	0.6656	1.4102	0.7552	1.166	0.8088	1.0424	0.8275	0.9616	0.8254	0.9023	0.8091	0.8518	0.7844
gt;MAE36240 unknown protein	136	2194	7.3518	6.4454	1.9393	1.6419	1.1711	1.0793	0.9939	0.9578	0.9282	0.9078	0.8914	0.8782	0.8697	0.8652	0.8636
gt;MAE11120 putative endoribonuclease	128	2192	5.8832	5.399	1.4934	1.4941	1.0622	1.0634	0.9887	0.9858	0.9602	0.9604	0.9433	0.9445	0.9263	0.9245	0.9099
gt;MAE48370 alpha/beta fold family hydrolase	148	2192	11.0724	7.5605	2.5123	2.0149	1.3329	1.1964	1.0482	0.9999	0.9555	0.9347	0.9183	0.9066	0.8956	0.8839	0.875
gt;MAE29970 Type II site-specific deoxyribonuclease	359	2192	41.6609	38.4656	17.1349	16.274	10.8378	10.3428	8.1049	7.8196	6.6259	6.4487	5.7124	5.5833	5.0897	4.9866	4.6359
gt;MAE20180 glycogen phosphorylase	383	2192	43.2933	40.1703	17.4096	16.8748	10.8232	10.4035	7.911	7.5736	6.3136	6.0452	5.3258	5.1095	4.6581	4.4859	4.1905
gt;MAE25300 putative transposase	217	2190	20.2856	16.8994	6.2238	5.0298	2.9623	2.4866	1.8522	1.6342	1.3862	1.2756	1.1652	1.1027	1.044	1.0052	0.9741
gt;MAE10300 periplasmic polyamine-binding protein	155	2188	9.0307	6.8154	2.0273	1.8031	1.2183	1.1768	1.0635	1.0572	1.0294	1.0349	1.0219	1.031	1.0254	1.0345	1.0314
gt;MAE47990 hypothetical protein	203	2188	15.2205	10.0887	3.1833	2.9672	1.6468	1.6702	1.2611	1.2753	1.1303	1.133	1.072	1.0712	1.0465	1.0469	1.0333
gt;MAE40920 aspartate carbamoyltransferase	137	2186	8.5077	5.5004	1.7594	1.5294	1.1114	1.0995	1.0304	1.0403	1.0313	1.0347	1.0364	1.0398	1.0419	1.0433	1.0447
gt;MAE50060 PHA-specific beta-ketothiolase PhaA	172	2186	11.7518	8.233	2.5497	2.15	1.3636	1.2696	1.0997	1.0737	1.0258	1.017	1.003	0.9974	0.9899	0.987	0.9841
gt;MAE46440 type III pantothenate kinase	105	2184	3.4676	3.892	1.0678	1.3059	0.9688	1.0095	0.9369	0.9338	0.9124	0.9039	0.8948	0.8906	0.8865	0.8824	0.8799
gt;MAE48270 hypothetical protein	226	2184	17.5725	17.0173	5.3752	4.6232	2.6113	2.2455	1.703	1.5303	1.3413	1.2581	1.1748	1.1222	1.074	1.0357	1.0044
gt;MAE58100 hypothetical protein	160	2182	8.6487	8.3387	2.3051	2.1988	1.3344	1.2907	1.0757	1.0447	0.9728	0.9496	0.9184	0.8998	0.8818	0.8708	0.8623
gt;MAE60430 hypothetical protein	161	2182	9.1627	8.7504	2.4158	2.2187	1.3661	1.2736	1.0894	1.0387	0.9859	0.9612	0.9449	0.9328	0.9243	0.9193	0.9161
gt;MAE18390 phosphate transport system substrate-binding protein	154	2182	9.2542	7.429	2.2691	1.9851	1.2892	1.2212	1.0714	1.0572	1.0184	1.0184	1.0068	1.0097	1.0038	1.0068	1.0033
gt;MAE60070 McnG protein	171	2182	10.4735	10.1033	2.7204	2.4699	1.4359	1.3374	1.1109	1.0563	0.9885	0.9607	0.9312	0.9127	0.8968	0.8851	0.8773
gt;MAE13050 seryl-tRNA synthetase	194	2182	16.199	11.5576	4.1383	3.4902	2.0725	1.8817	1.4571	1.3725	1.2179	1.1724	1.1075	1.085	1.0548	1.0415	1.0293
gt;MAE48900 glycyl-tRNA synthetase beta chain	318	2182	31.9103	26.169	10.9449	9.6066	6.1139	5.5269	4.2408	3.9093	3.3024	3.0876	2.7528	2.5991	2.3922	2.2748	2.1388
gt;MAE34930 NUDIX hydrolase	117	2180	5.3188	4.4557	1.3791	1.3365	1.0464	1.0468	0.9942	0.9919	0.9679	0.9581	0.9444	0.9388	0.9286	0.9197	0.9093
gt;MAE15760 transposase	182	2180	15.5972	13.8603	4.9481	3.9111	2.414	1.9956	1.5994	1.4296	1.2981	1.2247	1.1722	1.1398	1.1167	1.1009	1.0908
gt;MAE35530 site-specific DNA-methyltransferase	138	2178	9.4271	7.786	2.5926	2.1502	1.4465	1.3196	1.1629	1.124	1.0812	1.0655	1.0538	1.0501	1.0479	1.0515	1.056
gt;MAE03940 pyruvate kinase	242	2178	15.7258	15.841	4.697	5.0724	2.6217	2.7367	1.8867	1.8973	1.5324	1.5127	1.3412	1.3169	1.2253	1.2035	1.151
gt;MAE62020 transposase	198	2178	16.4254	13.1046	4.3788	3.5258	2.0921	1.7935	1.4122	1.2915	1.16	1.0995	1.0407	1.0089	0.9779	0.9555	0.9378
gt;MAE60490 hemolysin-type calcium-binding region protein	277	2178	21.7548	21.8434	8.2163	9.464	5.2142	5.9724	3.9383	4.3642	3.2085	3.4462	2.7306	2.8522	2.3885	2.4452	2.1364
gt;MAE24250 hypothetical protein	84	2176	3.8728	3.1057	1.1971	1.1839	1.0235	1.0394	1.0198	1.0291	1.0219	1.0291	1.0263	1.0304	1.0289	1.0317	1.0308
gt;MAE60670 probable protease HtpX	96	2174	3.5835	2.8522	1.0326	1.1842	0.9658	1.0274	0.9739	0.9881	0.9709	0.9738	0.9641	0.9653	0.9592	0.9597	0.9548
gt;MAE29720 alkanesulfonate monooxygenase	160	2174	8.9414	8.2591	2.3136	2.3444	1.3254	1.3856	1.0815	1.1113	0.998	1.0095	0.9643	0.9683	0.9468	0.952	0.9394
gt;MAE01860 hypothetical protein	86	2170	2.5159	2.5863	1.0349	1.1057	0.9918	1.0116	1.0058	1.0159	1.0219	1.0327	1.0422	1.0511	1.0617	1.0743	1.0887
gt;MAE04100 twitching motility protein PilT	160	2170	8.7067	8.2631	2.2898	2.1741	1.3429	1.2789	1.0895	1.0521	0.9909	0.9671	0.9424	0.9281	0.9167	0.9097	0.9027
gt;MAE60860 serine/threonine protein kinase	205	2168	12.7872	12.2482	3.8802	3.7064	2.2432	2.1398	1.7101	1.6353	1.4729	1.416	1.3351	1.2985	1.2597	1.2331	1.2082
gt;MAE40280 transposase	178	2168	17.6298	13.3872	5.0497	3.7473	2.3873	1.9373	1.586	1.4219	1.3083	1.2475	1.2025	1.1779	1.1591	1.148	1.1391
gt;MAE01090 bidirectional hydrogenase diaphorase subunit	226	2168	20.5545	16.6801	6.2402	5.2508	3.1896	2.7042	2.0551	1.8062	1.5465	1.4145	1.2919	1.2191	1.159	1.116	1.0837
gt;MAE00200 glucose-1-phosphate thymidylyltransferase (EC 2.7.7.24)	142	2166	6.8645	5.5944	1.5264	1.6457	1.0822	1.1508	1.0213	1.0518	1.0134	1.0289	1.019	1.0255	1.0247	1.0272	1.03
gt;MAE48950 prephenate dehydratase	102	2164	3.1124	2.9811	1.0362	1.1854	0.9915	1.0448	1.0077	1.028	1.0173	1.0321	1.0245	1.0378	1.032	1.0457	1.043
gt;MAE42330 hypothetical protein	173	2164	10.2114	8.6944	2.5313	2.2145	1.3746	1.2779	1.1053	1.0831	1.0347	1.0376	1.0182	1.0276	1.0158	1.0264	1.0169
gt;MAE51210 DNA modification methyltransferase related protein	420	2164	53.9247	53.5429	25.7386	24.0247	16.9618	15.4658	12.6968	11.6222	10.2394	9.4773	8.6589	8.1065	7.5578	7.1398	6.748
gt;MAE13010 periplasmic protein	119	2162	5.0546	4.8732	1.3923	1.4436	1.0499	1.043	0.9776	0.9664	0.9439	0.9292	0.9137	0.8992	0.8879	0.8798	0.8733
gt;MAE41850 mechanosensitive ion channel family protein	185	2162	8.4907	7.1273	1.9101	2.4982	1.2307	1.5445	1.0548	1.1959	0.9689	1.033	0.9115	0.9438	0.8728	0.8847	0.8451
gt;MAE17450 hypothetical protein	185	2162	11.1929	8.8326	2.4604	2.2724	1.3086	1.3082	1.0789	1.0923	1.0259	1.0333	1.0097	1.0136	1.003	1.0077	1.0004
gt;MAE42650 transposase	209	2162	20.3686	17.3821	6.5594	5.2077	3.2096	2.6426	2.0439	1.7914	1.5651	1.443	1.3445	1.2842	1.2352	1.2021	1.1782
gt;MAE52470 kinesin light chain	263	2162	24.1754	19.7338	7.2916	6.5445	3.7566	3.4706	2.4746	2.326	1.8842	1.7931	1.5701	1.5071	1.3899	1.3472	1.2801
gt;MAE17100 hypothetical protein	114	2160	4.5498	4.3547	1.3168	1.3152	1.0198	1.0008	0.9407	0.9181	0.8957	0.8792	0.8622	0.8527	0.8433	0.8352	0.8252
gt;MAE53660 beta-lactamase-like protein	103	2158	4.2969	3.9254	1.275	1.2823	1.049	1.0776	1.0496	1.0763	1.0907	1.113	1.1292	1.1447	1.1531	1.1588	1.1619
gt;MAE55690 putative phosphatase	102	2158	4.3991	3.4632	1.1625	1.2168	0.9897	1.0044	0.9435	0.9383	0.9031	0.8871	0.871	0.8605	0.8467	0.8378	0.8283
gt;MAE26170 cobalamin biosynthesis protein CobW	138	2158	6.9391	6.6533	1.7577	1.8319	1.1423	1.1756	1.0102	1.0176	0.9619	0.9628	0.9309	0.9275	0.9121	0.9064	0.9002
gt;MAE11090 hypothetical protein	232	2158	21.3793	18.6403	7.0451	6.1425	3.823	3.3274	2.5856	2.3002	1.9842	1.8094	1.6474	1.5389	1.4445	1.373	1.3158
gt;MAE59350 transposase	227	2158	22.7479	19.0308	7.2691	5.5908	3.3846	2.6781	2.0241	1.7222	1.4786	1.34	1.2336	1.1665	1.1155	1.0778	1.047
gt;MAE56400 hypothetical protein	280	2158	33.7484	29.666	13.7909	11.8835	8.1351	7.048	5.6444	4.9932	4.3132	3.8991	3.5103	3.2331	2.9855	2.7855	2.6112
gt;MAE50880 hypothetical protein	418	2158	45.624	48.3362	20.962	21.623	14.2278	13.8938	10.9112	10.4096	8.9237	8.4521	7.6016	7.203	6.6505	6.3217	5.9442
gt;MAE23230 N utilization substance protein B homolog	102	2156	4.8918	3.6389	1.2414	1.2429	1.0117	1.0317	0.9862	0.9915	0.9794	0.9806	0.9768	0.9774	0.9749	0.9753	0.9742
gt;MAE17670 hypothetical protein	172	2156	10.5747	8.425	2.4333	2.1789	1.3228	1.2745	1.0915	1.0789	1.0318	1.0333	1.0217	1.0265	1.0228	1.0264	1.0253
gt;MAE26640 menaquinone biosynthesis protein MenD	220	2154	14.5412	10.3919	3.1907	3.1933	1.7222	1.7579	1.3056	1.3237	1.1659	1.1776	1.1259	1.1387	1.1267	1.1379	1.1399
gt;MAE15230 hypothetical protein	105	2152	4.0586	3.4834	1.1825	1.1842	0.9972	0.9993	0.9706	0.971	0.9644	0.9652	0.9616	0.9616	0.959	0.9595	0.9582
gt;MAE14290 hypothetical protein	109	2152	4.7867	3.7824	1.2279	1.27	0.9794	1.0063	0.9367	0.9395	0.908	0.9035	0.8862	0.8814	0.8734	0.8698	0.8637
gt;MAE23290 anthranilate synthetase alpha-subunit	204	2152	12.6218	11.4078	3.4918	3.4902	1.911	1.9097	1.4156	1.4029	1.2149	1.2021	1.1273	1.1183	1.0854	1.0787	1.0635
gt;MAE59060 beta-carotene ketolase	221	2152	17.6579	12.9006	4.1106	3.7022	2.0468	1.8856	1.4209	1.3408	1.1835	1.142	1.0803	1.0601	1.0378	1.0306	1.0235
gt;MAE42350 peptidase S8 and S53, subtilisin, kexin, sedolisin	225	2152	18.8017	14.8621	5.0937	4.4737	2.5545	2.268	1.6953	1.5452	1.3353	1.2595	1.17	1.1302	1.0935	1.0741	1.0605
gt;MAE15600 tetratricopeptide TPR_2	156	2150	10.2798	8.0147	2.4611	2.0798	1.3503	1.2421	1.1013	1.0668	1.0307	1.0185	1.0082	1.0044	1.0008	0.9994	0.9981
gt;MAE19480 fatty acid/phospholipid synthesis protein PlsX	142	2148	6.5583	5.6158	1.608	1.582	1.1024	1.1065	1.021	1.0281	1.0047	1.0142	1.0056	1.0121	1.0065	1.0129	1.0072
gt;MAE51740 transposase	142	2148	13.5152	9.5121	3.8302	2.7953	1.8866	1.5851	1.3581	1.266	1.2018	1.1767	1.1607	1.1565	1.1558	1.157	1.1579
gt;MAE01230 tyrosyl tRNA synthetase	198	2148	14.7895	13.1136	4.0086	3.3224	1.9072	1.6485	1.3112	1.2049	1.1023	1.0516	1.0099	0.9824	0.964	0.9486	0.9376
gt;MAE40900 putative HlyD family secretion protein	200	2148	18.7175	13.5667	5.1441	3.9899	2.48	2.0508	1.6256	1.4476	1.2993	1.2218	1.1628	1.1301	1.1039	1.0884	1.0767
gt;MAE47970 tRNA-i(6)A37 modification enzyme	211	2148	22.6836	18.4747	7.737	6.0342	3.9091	3.1529	2.4789	2.1138	1.8279	1.6385	1.4947	1.3889	1.2999	1.2387	1.1846
gt;MAE37340 RND multidrug efflux transporter	341	2148	26.3176	23.503	8.0254	8.8204	4.7553	5.0377	3.3767	3.4364	2.6317	2.6056	2.1628	2.1133	1.856	1.8044	1.6422
gt;MAE10330 hypothetical protein	87	2146	2.8071	2.8873	1.081	1.1477	1.0245	1.0546	1.0574	1.077	1.0933	1.1126	1.1302	1.1519	1.1717	1.1878	1.1978
gt;MAE19650 hypothetical protein	147	2146	7.7475	6.9694	2.0992	1.8641	1.2785	1.1895	1.061	1.0208	0.9789	0.9576	0.9376	0.9252	0.9155	0.9117	0.9088
gt;MAE16760 hypothetical protein	101	2144	5.6278	3.7713	1.4032	1.2478	1.0807	1.0846	1.0826	1.1042	1.121	1.1392	1.149	1.1607	1.1642	1.1671	1.1678
gt;MAE14660 ABC-transporter ATP-binding protein	143	2144	9.7786	7.5605	2.4871	2.0702	1.3748	1.2446	1.0867	1.0349	0.9836	0.9597	0.937	0.9203	0.9045	0.8933	0.8808
gt;MAE34630 DNA cytosine methylase	158	2144	10.7377	7.8799	2.5812	2.0917	1.3655	1.233	1.0745	1.0331	0.9875	0.9745	0.9612	0.9559	0.9529	0.9508	0.9487
gt;MAE60590 hypothetical protein	167	2144	15.758	11.3449	4.5441	3.4173	2.2701	1.8767	1.5606	1.4021	1.2816	1.2121	1.1585	1.1222	1.0959	1.0765	1.0626
gt;MAE26080 serine/threonine protein kinase	217	2144	17.8431	15.2764	5.0309	4.386	2.4804	2.1811	1.6316	1.4806	1.2786	1.197	1.1081	1.0618	1.0148	0.9886	0.967
gt;MAE15350 transposase	209	2144	20.0977	16.5717	6.1243	4.7255	2.882	2.3247	1.8124	1.5835	1.4069	1.3089	1.242	1.2021	1.178	1.1627	1.1539
gt;MAE55450 molybdate-binding periplasmic protein	104	2140	3.004	3.0461	1.0261	1.1792	0.9723	1.0278	0.9826	1.0091	0.9867	1.0039	0.9874	1.0025	0.9866	1.0024	0.9864
gt;MAE49540 transposase	227	2140	19.9408	18.6898	6.6598	5.4188	3.2056	2.6287	1.9884	1.722	1.4856	1.3603	1.2577	1.1966	1.147	1.1176	1.0943
gt;MAE51780 hypothetical protein	212	2138	20.0946	15.3739	5.8888	4.4767	2.7899	2.2602	1.7712	1.5466	1.366	1.268	1.1881	1.1432	1.108	1.0844	1.0673
gt;MAE09340 resolvase related protein	80	2136	2.4213	2.5275	0.9653	1.1261	0.9656	1.0284	0.9887	1.0256	1.0106	1.0359	1.0366	1.0541	1.0618	1.0757	1.0902
gt;MAE39710 ATPase	191	2136	13.7432	12.8119	4.1863	3.7144	2.2444	2.0185	1.6173	1.503	1.3557	1.294	1.2262	1.189	1.1499	1.1239	1.0948
gt;MAE12360 carotene isomerase	221	2136	16.4916	15.9141	5.0174	4.4494	2.4637	2.1798	1.6139	1.4723	1.2665	1.1908	1.0993	1.0586	1.0117	0.985	0.9585
gt;MAE54820 transposase	208	2136	22.0744	18.7344	7.7007	6.0702	3.8085	3.0771	2.3521	2.0122	1.7185	1.5515	1.4216	1.3374	1.2757	1.2343	1.2025
gt;MAE48130 penicillin-binding protein	297	2136	26.2471	23.3314	8.5838	7.7379	4.4894	3.9013	2.8147	2.4569	2.0036	1.7975	1.5839	1.4644	1.3512	1.2861	1.2291
gt;MAE02710 hypothetical protein	105	2134	4.4662	4.1152	1.3182	1.2506	1.0302	1.0062	0.9817	0.9756	0.9703	0.9678	0.9653	0.9647	0.9645	0.9645	0.9645
gt;MAE53650 peptidase M50	154	2134	5.0631	4.0043	0.9132	1.7097	0.7924	1.2996	0.8312	1.1228	0.8391	1.0205	0.8367	0.9489	0.8274	0.8957	0.8138
gt;MAE59200 hypothetical protein	104	2134	6.4282	4.475	1.6118	1.3471	1.0689	1.0065	0.9535	0.9337	0.919	0.9156	0.913	0.9127	0.9124	0.9124	0.9124
gt;MAE50310 1-deoxy-d-xylulose 5-phosphate reductoisomerase	162	2134	8.0652	7.7562	2.1331	2.3132	1.3626	1.4119	1.148	1.1535	1.062	1.0575	1.0252	1.0234	1.0123	1.0101	1.0058
gt;MAE17490 ribosomal large subunit pseudouridine synthase E	103	2132	4.9179	3.9222	1.3094	1.2208	1.0522	1.059	1.054	1.0612	1.0615	1.063	1.0633	1.0635	1.0635	1.0635	1.0635
gt;MAE31840 unknown protein	342	2132	44.4938	42.0111	20.1049	18.2664	12.9122	11.5969	9.5211	8.6223	7.5732	6.9479	6.3216	5.8814	5.4635	5.1357	4.8372
gt;MAE23240 putative adenylate cyclase family protein	82	2130	2.9747	2.5111	1.0385	1.0987	1.0022	1.0192	1.0079	1.0111	1.0075	1.008	1.0072	1.0072	1.0072	1.0071	1.0071
gt;MAE01850 hypothetical protein	98	2130	4.4185	3.6288	1.2762	1.2039	1.0587	1.0647	1.0613	1.0636	1.0638	1.0638	1.0638	1.0638	1.0638	1.0638	1.0638
gt;MAE23100 iron-sulfur cluster biosynthesis transcriptional regulator SufR	105	2128	4.5374	4.4328	1.3058	1.3726	1.0219	1.0558	1.008	1.0176	1.0115	1.0127	1.0113	1.0111	1.0111	1.0111	1.0111
gt;MAE22250 transposase	179	2128	16.6497	13.3257	4.7487	3.5074	2.1338	1.7209	1.3927	1.2553	1.1614	1.1142	1.0857	1.0718	1.0649	1.0602	1.0582
gt;MAE61110 hypothetical protein	181	2126	14.6091	11.9527	3.9997	3.1221	1.9204	1.6177	1.3386	1.2279	1.1462	1.107	1.0823	1.0696	1.0605	1.0556	1.0538
gt;MAE47080 hypothetical protein	264	2124	24.9627	23.6087	9.0396	7.4433	4.5342	3.6768	2.7548	2.3155	1.9369	1.7127	1.5268	1.4008	1.3012	1.2283	1.1703
gt;MAE52720 AvaI methyltransferase-homolog	226	2122	19.388	18.1329	6.4755	5.4926	3.3262	2.7922	2.1501	1.8813	1.6287	1.4884	1.3694	1.2866	1.221	1.1711	1.1274
gt;MAE07440 transposase	227	2122	24.931	20.2273	8.3567	6.3592	4.0094	3.1618	2.4154	2.039	1.7368	1.5561	1.415	1.3205	1.2508	1.199	1.1603
gt;MAE29080 hypothetical protein	317	2122	30.3629	29.6419	10.8926	11.9866	6.9368	7.2586	5.2443	5.2678	4.3035	4.2218	3.6943	3.5919	3.2755	3.1735	2.9707
gt;MAE13030 glycosyl transferase	131	2120	7.236	5.1899	1.5947	1.5416	1.0866	1.1085	1.0157	1.0356	1.0082	1.0237	1.0086	1.0233	1.0128	1.0246	1.0187
gt;MAE31720 two-component hybrid sensor and regulator	335	2120	34.3527	33.517	14.9071	14.3518	9.6199	8.9339	7.0965	6.5464	5.6561	5.2482	4.7394	4.4415	4.1186	3.8956	3.6743
gt;MAE37870 hypothetical protein	97	2118	2.6225	2.6144	0.9568	1.1454	0.9613	1.0299	0.9756	1.0045	0.9758	0.9877	0.9708	0.9751	0.9663	0.9662	0.9631
gt;MAE11290 triosephosphate isomerase	114	2118	5.3438	4.85	1.4222	1.3699	1.0656	1.0761	1.0522	1.0692	1.0701	1.073	1.0733	1.0735	1.0735	1.0735	1.0735
gt;MAE20500 ABC-transporter ATP-binding protein	134	2116	6.0444	4.9055	1.4806	1.45	1.0585	1.0895	1.0106	1.0371	1.0151	1.0305	1.0205	1.0341	1.0273	1.0396	1.0339
gt;MAE41340 hypothetical protein	147	2116	9.235	6.9173	2.124	1.7772	1.2361	1.1448	1.0509	1.0271	1.0013	0.9946	0.9846	0.9813	0.9751	0.9727	0.9686
gt;MAE42690 transposase	275	2116	27.0099	24.7744	9.1736	7.9354	4.7078	3.9991	2.9413	2.5407	2.0974	1.8664	1.6563	1.5247	1.4126	1.3391	1.2776
gt;MAE55920 hypothetical protein	99	2114	3.8621	3.1799	1.1899	1.1383	0.9821	0.9596	0.9232	0.9095	0.8921	0.8802	0.8704	0.8628	0.8538	0.8462	0.8397
gt;MAE58880 hypothetical protein	126	2114	7.1135	5.7945	1.8366	1.5764	1.1485	1.071	0.9941	0.9677	0.9479	0.9391	0.9311	0.9255	0.919	0.9134	0.9062
gt;MAE50260 hypothetical protein	188	2114	13.8201	12.4197	3.9448	3.4442	1.9736	1.7968	1.3838	1.3165	1.1657	1.1318	1.0656	1.0453	1.013	0.9979	0.9759
gt;MAE15270 mannosyltransferase	166	2112	9.7703	8.2623	2.4335	2.2152	1.3922	1.3149	1.1245	1.098	1.0499	1.0421	1.0238	1.0195	1.0135	1.0137	1.0112
gt;MAE53250 potassium-transporting P-type ATPase D chain	162	2112	9.8393	9.09	2.7533	2.4881	1.5417	1.4608	1.2247	1.1872	1.1084	1.0874	1.0526	1.0352	1.0162	1.0044	0.9928
gt;MAE45850 glycosyl transferase family 2	144	2108	11.0263	7.748	2.6329	2.0253	1.3707	1.2034	1.0691	1.0175	0.9802	0.9597	0.9454	0.9387	0.9345	0.9305	0.9273
gt;MAE03040 serine phosphatase	216	2106	18.9242	15.033	5.1987	4.1972	2.4999	2.1114	1.6455	1.4708	1.2988	1.2102	1.1401	1.0971	1.0622	1.0394	1.0216
gt;MAE10850 unknown protein	147	2104	9.0826	7.3677	2.2845	1.8494	1.2757	1.1726	1.0712	1.0525	1.0296	1.0283	1.0274	1.0291	1.0299	1.0338	1.0379
gt;MAE39820 ABC-transporter ATP-binding protein	248	2102	18.3113	13.3391	4.1401	3.9832	1.9069	2.1326	1.3125	1.5336	1.134	1.2935	1.0801	1.1922	1.0759	1.1602	1.0894
gt;MAE30680 hypothetical protein	70	2100	2.0816	1.9952	1.0269	1.0521	1.0292	1.0319	1.033	1.0332	1.0335	1.0335	1.0335	1.0335	1.0335	1.0335	1.0335
gt;MAE21940 hypothetical protein	132	2100	8.0958	5.7487	1.8031	1.505	1.1095	1.0383	0.9633	0.9369	0.917	0.9052	0.8971	0.8883	0.879	0.8699	0.8628
gt;MAE48880 magnesium protoporphyrin IX chelatase subunit I	159	2100	10.0222	8.2602	2.3878	2.2699	1.3407	1.3651	1.1005	1.1117	1.0191	1.0194	0.9764	0.9722	0.9532	0.9513	0.942
gt;MAE06160 phosphoenolpyruvate carboxykinase	225	2100	19.6542	16.4189	5.7138	4.614	2.7284	2.247	1.7228	1.5157	1.3268	1.2301	1.1531	1.1076	1.0738	1.0511	1.033
gt;MAE07070 hypothetical protein	133	2098	6.4116	5.4558	1.6246	1.4992	1.1088	1.0694	1.0013	0.9883	0.9732	0.9678	0.9631	0.9612	0.9562	0.9528	0.9495
gt;MAE44860 putative lipid-A-disaccharide synthase	172	2098	8.431	8.5248	2.2699	2.4914	1.4104	1.4518	1.1606	1.1653	1.0708	1.0741	1.0396	1.044	1.0323	1.0348	1.0308
gt;MAE44620 ankyrin repeat domain-containing protein 50	169	2098	8.9549	8.2985	2.263	2.4669	1.3926	1.455	1.1574	1.1699	1.0736	1.0722	1.0333	1.0282	1.0093	1.0008	0.9916
gt;MAE38410 transposase	142	2098	10.2534	8.3248	2.8406	2.2707	1.5221	1.3728	1.2092	1.1676	1.1234	1.1102	1.0954	1.0897	1.0847	1.0801	1.077
gt;MAE04420 transposase	192	2098	16.3103	14.9699	5.3191	4.2233	2.6408	2.1929	1.779	1.5942	1.4503	1.3679	1.3071	1.2657	1.2342	1.2149	1.1991
gt;MAE31590 threonyl-tRNA synthetase	262	2098	27.351	22.6532	9.6439	8.4043	5.5445	4.9017	3.8802	3.4969	3.0311	2.7874	2.5322	2.3727	2.2126	2.0989	1.9933
gt;MAE29460 hypothetical protein	326	2098	33.3294	28.6315	11.2363	10.1492	6.1446	5.4845	4.0599	3.6272	2.98	2.6904	2.3465	2.1525	1.9516	1.8191	1.6919
gt;MAE57070 putative diacylglycerol kinase	152	2096	10.247	7.6579	2.4318	2.1774	1.4036	1.3218	1.1399	1.1042	1.0545	1.0402	1.0259	1.0199	1.0149	1.0128	1.0105
gt;MAE41240 hypothetical protein	305	2096	30.6479	27.3488	11.1842	10.2046	6.462	5.878	4.5202	4.1355	3.517	3.2481	2.9179	2.7278	2.5308	2.3963	2.2622
gt;MAE30010 transfer RNA-Gln reductase	191	2094	14.7391	10.7768	3.652	3.2217	1.8956	1.8271	1.403	1.3861	1.2228	1.2119	1.1373	1.1314	1.0944	1.0917	1.0726
gt;MAE25950 ATP-dependent Clp protease ATPase subunit	341	2094	36.28	32.8963	14.0419	12.7651	8.2657	7.4009	5.7603	5.1724	4.4097	4.0141	3.5932	3.3254	3.0638	2.8711	2.6958
gt;MAE46740 methylenetetrahydrofolate dehydrogenase (NADP+)	109	2090	3.8691	3.7251	1.1669	1.2746	1.004	1.0449	0.9945	1.0167	0.997	1.0106	0.9996	1.0102	1.0003	1.0097	1.0013
gt;MAE35870 hypothetical protein	112	2090	5.0692	4.4558	1.3703	1.3806	1.0729	1.0835	1.0412	1.0527	1.0552	1.0683	1.079	1.0942	1.11	1.1304	1.1461
gt;MAE44940 elongation factor TS	126	2088	7.2688	5.7571	1.8898	1.5904	1.1904	1.1354	1.0772	1.0748	1.069	1.0804	1.0868	1.1044	1.1175	1.1382	1.1528
gt;MAE46780 periplasmic carboxyl-terminal protease	175	2088	14.329	11.4386	4.1047	3.3852	2.0793	1.785	1.4207	1.292	1.1687	1.113	1.0675	1.0422	1.0218	1.0093	1
gt;MAE50160 ATP synthase CF1 alpha chain AtpA	217	2088	19.9524	15.5617	5.8479	4.703	2.8709	2.3852	1.8346	1.6112	1.4003	1.2895	1.1963	1.145	1.0993	1.0715	1.0498
gt;MAE46750 hypothetical protein	91	2086	2.4074	2.7001	0.9971	1.1551	0.967	1.0186	0.9802	0.9967	0.986	0.9896	0.9864	0.9865	0.9861	0.9861	0.9861
gt;MAE48200 PspA/IM30 family protein	109	2086	3.839	3.5309	1.079	1.2459	0.9626	1.0161	0.9461	0.9634	0.9352	0.938	0.9237	0.9211	0.9153	0.9108	0.9066
gt;MAE30670 hypothetical protein	88	2086	5.2666	3.3792	1.4102	1.2018	1.0206	0.9708	0.9411	0.9243	0.9167	0.9131	0.9122	0.9118	0.9117	0.9117	0.9117
gt;MAE09730 type IV pilus assembly protein PilO	92	2084	2.7959	3.1555	1.0492	1.1791	0.9795	0.9963	0.9639	0.9628	0.9532	0.9502	0.9464	0.9444	0.9408	0.939	0.9363
gt;MAE17190 cytosine-specific methyltransferase	180	2084	14.237	11.381	4.1275	3.3747	2.1764	1.8484	1.5123	1.3592	1.2382	1.1647	1.1117	1.0794	1.0528	1.0363	1.0238
gt;MAE47620 hypothetical protein	343	2084	39.6666	36.4097	16.0402	14.0857	9.2942	8.0712	6.2792	5.5041	4.6468	4.1479	3.6602	3.3231	3.02	2.781	2.5718
gt;MAE10940 probable glycosyl transferase	137	2082	7.1696	5.964	1.7831	1.7512	1.1644	1.1675	1.0203	1.0139	0.9713	0.9682	0.9518	0.9492	0.9409	0.9371	0.9295
gt;MAE56690 transposase	178	2082	13.2669	12.2341	4.039	3.3537	2.0503	1.7605	1.4254	1.3104	1.2063	1.1631	1.1281	1.1103	1.0987	1.0924	1.0883
gt;MAE29810 riboflavin biosynthesis protein RibA	189	2082	15.748	11.4425	4.0404	3.3604	1.896	1.7896	1.2965	1.3092	1.1002	1.1245	1.0259	1.046	0.9955	1.0075	0.9794
gt;MAE42280 transposase	203	2082	17.488	17.0689	5.9153	5.0672	3.0134	2.5592	1.9691	1.7441	1.5191	1.4054	1.3065	1.2451	1.1929	1.1506	1.1147
gt;MAE38640 McyH protein	249	2082	17.9369	13.3775	4.3448	4.4406	2.1739	2.6526	1.6453	2.0076	1.4706	1.7085	1.3998	1.5435	1.3578	1.441	1.3289
gt;MAE53700 33 kDa chaperonin	149	2080	12.1594	8.308	3.0328	2.3743	1.5713	1.3653	1.166	1.089	1.0271	0.9928	0.9671	0.9512	0.9354	0.9238	0.9104
gt;MAE43670 phosphoglycerate kinase	184	2080	13.2662	10.2712	3.1243	2.82	1.6255	1.5256	1.2124	1.1656	1.0593	1.0375	1	0.9872	0.9725	0.9657	0.9558
gt;MAE56510 3-oxoacyl-[acyl-carrier-protein] reductase like	95	2078	3.6209	3.1422	1.178	1.1591	1.0039	1.0039	0.9795	0.9808	0.9711	0.9711	0.9666	0.9648	0.9647	0.9635	0.9632
gt;MAE62580 serine/threonine protein kinase	308	2076	32.7529	30.4466	12.6222	11.1123	7.0919	6.0395	4.6107	3.9506	3.293	2.8907	2.5283	2.2728	2.0544	1.882	1.7396
gt;MAE48170 unknown protein	190	2074	16.6722	13.8351	4.6334	3.7033	2.187	1.8396	1.462	1.3287	1.2151	1.1706	1.1388	1.1306	1.1248	1.1253	1.1293
gt;MAE39950 unknown protein	316	2074	39.7947	38.6828	18.5655	16.8112	11.891	10.5945	8.6999	7.8412	6.8906	6.316	5.7569	5.3549	4.9869	4.6941	4.4283
gt;MAE25190 hypothetical protein	117	2072	4.9289	4.9047	1.4098	1.4683	1.0618	1.0469	0.9667	0.9443	0.9179	0.9032	0.8902	0.8814	0.8721	0.8664	0.8578
gt;MAE52920 group 3 RNA polymerase sigma factor SigF	127	2072	6.9477	6.0973	1.8024	1.5683	1.1529	1.1077	1.0669	1.0724	1.0763	1.0803	1.0824	1.0835	1.0837	1.0839	1.084
gt;MAE57970 diaphorase subunit of the bidirectional hydrogenase	126	2070	9.9514	6.7111	2.6596	2.0918	1.5002	1.342	1.1987	1.1475	1.1026	1.0855	1.0709	1.0672	1.0641	1.0655	1.0712
gt;MAE18160 Mo-dependent nitrogenase-like	116	2066	5.1635	4.4	1.3669	1.3039	1.0544	1.0497	1.0171	1.0217	1.0178	1.0243	1.0284	1.0385	1.0463	1.0574	1.0675
gt;MAE28650 hypothetical protein	160	2066	11.3125	8.7854	2.8829	2.3395	1.4901	1.3262	1.1393	1.0823	1.0331	1.0152	0.9968	0.9927	0.9866	0.9855	0.9817
gt;MAE45440 transposase	194	2066	19.1474	15.3838	6.0734	4.638	2.9011	2.3138	1.7966	1.5374	1.3375	1.218	1.1276	1.0679	1.0222	0.9874	0.9607
gt;MAE01530 transposase	277	2066	32.9942	28.8793	13.1624	11.305	7.8728	6.8554	5.6394	5.0508	4.4804	4.1194	3.7979	3.561	3.352	3.187	3.0434
gt;MAE41170 biotin/lipoate A/B protein ligase family protein	108	2064	4.9291	4.2664	1.3849	1.2862	1.0484	1.0329	1.0031	1.0046	1.0016	1.003	1.0043	1.0083	1.0112	1.0152	1.0181
gt;MAE07900 transposase	194	2064	15.4212	13.3912	4.328	3.4632	2.0191	1.6919	1.3452	1.2148	1.1005	1.0438	0.9986	0.9684	0.9475	0.9292	0.9186
gt;MAE59250 transposase	205	2064	16.7572	14.6552	4.9231	4.0061	2.3487	1.9809	1.5455	1.3876	1.2468	1.1764	1.1227	1.0906	1.0655	1.0537	1.0441
gt;MAE02630 transposase	227	2064	20.1355	19.0558	6.5438	5.4503	3.142	2.6066	1.9527	1.707	1.4758	1.3586	1.2602	1.2012	1.1553	1.1238	1.1032
gt;MAE00230 excinuclease ABC subunit C	314	2064	36.418	32.2088	14.6207	13.3784	9.0269	8.3262	6.6347	6.1819	5.349	5.0238	4.5498	4.2986	3.9952	3.8002	3.5837
gt;MAE36930 hypothetical protein	332	2064	42.0329	41.5593	20.7116	18.5183	13.5723	12.0464	10.1426	9.1587	8.1787	7.5225	6.9152	6.4421	6.0253	5.6792	5.3704
gt;MAE25500 transposase	141	2062	8.7553	8.2332	2.5105	2.2043	1.4424	1.3289	1.1529	1.1069	1.0511	1.0328	1.0163	1.0097	1.0056	1.0035	1.002
gt;MAE02730 precorrin-8X methylmutase (EC 5.4.1.2)	81	2060	1.9902	2.4042	0.9561	1.0869	0.9597	0.9779	0.9496	0.9494	0.9397	0.9356	0.927	0.9247	0.9121	0.9046	0.8928
gt;MAE46380 unknown protein	219	2060	10.6654	10.5077	2.5798	3.5802	1.4818	2.1673	1.2186	1.6365	1.1271	1.3818	1.0929	1.2421	1.0736	1.1611	1.0628
gt;MAE42720 serine/threonine kinase	118	2058	4.9776	5.4855	1.5538	1.6398	1.1301	1.1548	1.0459	1.0477	1.0155	1.0135	0.9999	0.9961	0.989	0.9846	0.9761
gt;MAE37850 hypothetical protein	155	2056	10.1829	7.8258	2.4406	2.1635	1.3223	1.2912	1.0762	1.0797	1.0115	1.0228	0.9945	1.005	0.9898	0.9963	0.9855
gt;MAE53530 transposase	210	2056	18.1362	17.3129	6.0152	4.9845	2.9282	2.4541	1.8611	1.6327	1.4095	1.3073	1.2079	1.155	1.1141	1.0887	1.0681
gt;MAE52670 peptide transport system permease portein	84	2054	1.2421	1.8097	0.6961	1.2124	0.8718	1.1219	0.9716	1.112	1.0334	1.1184	1.0737	1.1323	1.1086	1.1524	1.1369
gt;MAE13910 major membrane protein I	141	2054	7.1842	6.1848	1.8279	1.6466	1.1595	1.1043	1.0123	0.9935	0.9691	0.9605	0.9533	0.9499	0.9476	0.9455	0.945
gt;MAE28230 lysyl-tRNA synthetase	287	2054	31.6209	27.8782	11.6705	9.9424	6.2821	5.3492	4.0326	3.4992	2.8963	2.5723	2.2526	2.0473	1.8562	1.7201	1.5961
gt;MAE11790 putative oxidoreductase	212	2052	15.3573	11.645	3.6862	3.6343	1.9716	2.016	1.4654	1.4724	1.2482	1.242	1.1391	1.1256	1.0758	1.0646	1.0399
gt;MAE37900 transposase	183	2052	20.7557	16.7192	7.388	5.5537	3.6653	2.8985	2.2793	1.9368	1.6787	1.5065	1.3838	1.2975	1.2314	1.184	1.1492
gt;MAE00320 imidazole glycerol phosphate synthase subunit	96	2050	3.1157	3.1968	1.0317	1.2275	0.964	1.027	0.9604	0.9756	0.9406	0.9332	0.9061	0.8895	0.8692	0.8541	0.8376
gt;MAE06380 hypothetical protein	123	2050	4.8547	4.8694	1.3071	1.5274	1.0299	1.0974	0.9815	0.9979	0.9564	0.9621	0.9411	0.9412	0.9293	0.9283	0.9231
gt;MAE06700 coproporphyrinogen III oxidase, aerobic (EC 1.3.3.3)	154	2050	9.9623	9.2703	2.9063	2.449	1.5873	1.4222	1.2385	1.1821	1.1372	1.1187	1.1068	1.1065	1.1087	1.1146	1.1241
gt;MAE44510 pyruvate dehydrogenase E1 component, alpha subunit	158	2048	8.9192	8.8721	2.4257	2.5976	1.4341	1.5355	1.1729	1.2123	1.0693	1.0784	1.0125	1.0066	0.9707	0.9583	0.937
gt;MAE00890 ATP-dependent DNA helicase RecQ	308	2048	32.9515	29.922	12.2167	11.0692	6.7046	6.0717	4.3794	3.9835	3.1706	2.9007	2.4582	2.2665	2.0079	1.8663	1.7063
gt;MAE24100 hypothetical protein	143	2046	6.4345	5.2874	1.4785	1.5581	1.0663	1.1167	1.0148	1.0467	1.0201	1.0411	1.0315	1.0431	1.0385	1.0451	1.0441
gt;MAE17500 ABC-2 type transport system permease protein	82	2042	1.7839	2.2221	0.9036	1.1324	0.964	1.0342	0.9933	1.0164	1.0008	1.0124	1.0034	1.01	1.0036	1.0087	1.0027
gt;MAE63100 hypothetical protein	168	2042	10.4769	9.2856	2.7201	2.3382	1.4254	1.2974	1.0979	1.0439	0.9866	0.9613	0.9392	0.924	0.9121	0.9034	0.8993
gt;MAE13970 transposase	196	2042	15.5177	14.8379	5.2634	4.4091	2.7986	2.4033	1.9588	1.7763	1.6119	1.5175	1.4368	1.3842	1.3401	1.3039	1.2789
gt;MAE55810 serine/threonine protein kinase	241	2042	23.2033	19.067	7.64	6.4621	3.9248	3.408	2.5152	2.2515	1.853	1.7086	1.5103	1.4235	1.3114	1.26	1.1941
gt;MAE16270 hypothetical protein	100	2040	4.4137	4.2881	1.405	1.3324	1.0742	1.0572	1.0314	1.0265	1.0225	1.0216	1.0214	1.0211	1.021	1.021	1.021
gt;MAE22940 cytochrome c oxidase subunit I	158	2040	5.7569	5.7371	1.2927	2.0396	1.0173	1.3686	1.0119	1.1824	1.049	1.1357	1.0866	1.1358	1.1187	1.1501	1.1463
gt;MAE18940 adenine-specific DNA metylase	117	2040	7.6291	5.2475	1.8009	1.5621	1.1336	1.0945	1.0074	0.9994	0.9697	0.9629	0.9479	0.9444	0.9374	0.9329	0.9313
gt;MAE32480 carboxyl-terminal processing protease	159	2040	8.7331	9.2848	2.7142	2.6386	1.6252	1.5409	1.2861	1.2269	1.1394	1.105	1.0661	1.043	1.0211	1.0041	0.9888
gt;MAE28690 bacterioferritin	80	2038	2.7606	2.5338	1.0455	1.0732	0.9715	0.9677	0.9486	0.9434	0.9305	0.9237	0.9124	0.9058	0.8989	0.8951	0.8918
gt;MAE46290 thioredoxin-related	116	2038	4.6141	4.2759	1.2834	1.3818	1.0311	1.054	0.9853	0.9893	0.9681	0.9638	0.9544	0.9493	0.9429	0.9382	0.9328
gt;MAE08490 transposase	214	2036	16.7777	16.0461	5.3196	4.8535	2.6725	2.4982	1.7752	1.7079	1.4049	1.3715	1.2195	1.1979	1.1198	1.0979	1.0505
gt;MAE61040 hypothetical protein	136	2032	7.778	7.528	2.2937	1.9578	1.3148	1.2164	1.1117	1.0949	1.0819	1.0877	1.0918	1.0958	1.0977	1.0987	1.0991
gt;MAE01180 putative amino acid racemase	152	2032	8.8683	7.493	2.2059	1.9863	1.2707	1.2084	1.0637	1.0383	1.0031	0.9984	0.9886	0.9886	0.9828	0.9836	0.9801
gt;MAE59550 ATP-dependent Clp protease ATPase subunit	363	2032	44.4783	42.0669	19.9999	17.9512	12.4593	11.1177	8.9377	8.0664	6.9614	6.3748	5.7301	5.3158	4.896	4.5869	4.2939
gt;MAE59640 pyruvate dehydrogenase complex dihydrolipoamide acetyltransferase component	179	2030	9.5013	7.0217	1.8888	2.1834	1.1439	1.3843	1.0381	1.1705	1.0345	1.1113	1.0508	1.1006	1.0695	1.1058	1.0868
gt;MAE26140 hypothetical protein	177	2030	11.6098	10.3846	2.9999	2.6993	1.5465	1.4424	1.1684	1.1202	1.0328	1.0047	0.9708	0.9558	0.9375	0.9274	0.917
gt;MAE28550 hypothetical protein	146	2030	12.551	8.7192	3.4834	2.5838	1.7481	1.4638	1.245	1.1424	1.0648	1.0219	0.9869	0.9651	0.9433	0.9295	0.9143
gt;MAE38960 transposase	142	2030	14.2307	10.1106	4.1545	2.9919	2.0045	1.6571	1.4053	1.2916	1.2125	1.1735	1.1462	1.1307	1.121	1.1159	1.112
gt;MAE15950 heat shock protein 70	327	2030	40.8739	39.8241	19.3261	17.2918	12.3529	10.8713	8.964	7.9935	7.0274	6.3824	5.8011	5.3528	4.9644	4.6434	4.3658
gt;MAE58050 tetratricopeptide TPR_2	352	2030	43.8475	41.4866	19.4737	18.1745	12.511	11.5464	9.3074	8.5974	7.4905	6.9669	6.3308	5.9401	5.5276	5.2367	4.945
gt;MAE59020 thiosulfate sulfurtransferase	118	2028	5.4973	4.7752	1.4151	1.4712	1.0457	1.0503	0.9621	0.9546	0.9242	0.9164	0.905	0.8987	0.8913	0.8861	0.8817
gt;MAE30050 ferripyochelin binding protein	84	2026	2.7695	2.6081	1.0832	1.1061	1.0137	1.0247	1.0228	1.0385	1.0505	1.071	1.091	1.1141	1.1362	1.1571	1.1712
gt;MAE32860 dTDP-glucose 4,6-dehydratase	124	2026	6.3089	5.7954	1.7023	1.6891	1.1545	1.1837	1.0727	1.0985	1.0734	1.0926	1.0938	1.1123	1.1242	1.1353	1.1417
gt;MAE25670 hypothetical protein	171	2026	7.4133	6.2366	1.5491	1.8839	1.1128	1.2525	1.0656	1.1334	1.0896	1.1226	1.1193	1.1399	1.1471	1.161	1.1746
gt;MAE49790 hypothetical protein	202	2026	15.3181	12.8892	4.3643	4.1505	2.3866	2.2799	1.6986	1.6219	1.385	1.3332	1.2212	1.1845	1.1294	1.1014	1.0714
gt;MAE28430 carbamoyl-phosphate synthase small chain	169	2026	15.9347	11.5807	4.4703	3.3834	2.1812	1.7806	1.4519	1.2885	1.1629	1.0867	1.0329	0.9921	0.9584	0.9331	0.9148
gt;MAE15140 NADH dehydrogenase subunit 4 NdhD	149	2024	3.5658	3.5767	0.7889	1.6688	0.8223	1.2517	0.879	1.0824	0.891	1.0014	0.8926	0.9535	0.8889	0.9218	0.8846
gt;MAE54260 transposase	106	2024	4.9148	4.4632	1.4363	1.334	1.0855	1.081	1.0644	1.0809	1.0908	1.1017	1.1062	1.1087	1.1093	1.1097	1.1097
gt;MAE23860 fructose-1,6-bisphosphatase	150	2024	8.0666	7.4748	2.0446	1.942	1.2379	1.1891	1.0429	1.011	0.9691	0.9525	0.9371	0.9294	0.9215	0.9152	0.9105
gt;MAE32710 putative glycosyl transferase	180	2024	13.4294	11.0318	3.4762	3.0943	1.8485	1.7386	1.3907	1.3321	1.1962	1.151	1.0859	1.0562	1.018	0.9972	0.9749
gt;MAE11710 probable protease htpX homolog	229	2024	16.2313	13.3848	4.088	4.299	2.1132	2.3019	1.5058	1.6155	1.2729	1.3323	1.1697	1.2066	1.1248	1.1472	1.1071
gt;MAE57100 hypothetical protein	88	2022	2.7393	2.3487	0.9136	1.1531	0.9553	1.041	0.9919	1.0273	1.0128	1.0338	1.0327	1.0455	1.0481	1.0585	1.0643
gt;MAE61940 plasma membrane protein	134	2022	9.2265	6.9609	2.2695	1.7762	1.2655	1.1574	1.0812	1.0612	1.0517	1.0516	1.0511	1.0515	1.0514	1.0517	1.0518
gt;MAE31600 cobalamin synthesis protein cobW homolog	158	2022	10.9531	8.4067	2.6529	2.1635	1.363	1.2469	1.0725	1.0342	0.9846	0.9723	0.9554	0.9501	0.9419	0.9389	0.9335
gt;MAE52890 primosomal protein N'	336	2022	36.6237	35.1362	15.9409	14.7449	10.0569	9.1213	7.3069	6.6689	5.7626	5.3236	4.7995	4.4824	4.1458	3.9089	3.6693
gt;MAE58610 short-chain dehydrogenase	175	2020	11.6806	10.3048	3.3589	3.0928	1.9403	1.814	1.4949	1.4095	1.2837	1.2323	1.1661	1.1292	1.093	1.0658	1.043
gt;MAE30190 hypothetical protein	313	2020	33.1967	30.767	12.3215	10.7201	6.6463	5.599	4.1827	3.5653	2.9274	2.5606	2.2276	2.0002	1.8054	1.6645	1.5449
gt;MAE24230 urease accessory protein G	82	2018	2.2328	2.4007	0.954	1.1125	0.9556	0.9722	0.9273	0.9174	0.8904	0.8748	0.8533	0.8393	0.8229	0.8125	0.8021
gt;MAE09280 ABC-transporter periplasmic phosphate-binding protein	144	2018	8.3717	6.3555	1.8895	1.8025	1.1301	1.1808	1.0038	1.0474	0.982	1.0106	0.9827	1.0003	0.9855	0.9975	0.9856
gt;MAE18230 hypothetical protein	139	2018	9.2954	7.6626	2.4935	1.9833	1.3631	1.2321	1.1292	1.1044	1.092	1.0893	1.0879	1.0883	1.0887	1.0889	1.089
gt;MAE13670 succinate dehydrogenase iron-sulphur protein subunit	149	2018	9.6359	8.998	2.8263	2.427	1.5544	1.4115	1.219	1.1648	1.1145	1.1005	1.0881	1.087	1.086	1.0922	1.0978
gt;MAE44850 DNA primase	257	2018	19.454	18.0925	6.0377	5.9358	3.2892	3.1105	2.217	2.0585	1.6852	1.5799	1.4014	1.3327	1.2452	1.2044	1.156
gt;MAE06320 hypothetical protein	113	2016	5.0161	4.3379	1.3393	1.3461	1.0682	1.0898	1.0597	1.0858	1.0932	1.1075	1.1156	1.1219	1.1281	1.1326	1.1358
gt;MAE10810 hypothetical protein	172	2016	8.3721	6.5997	1.7793	2.1745	1.1618	1.3898	1.0548	1.1714	1.0497	1.115	1.0655	1.1116	1.0889	1.124	1.1151
gt;MAE56570 isopentenyl-dephosphate delta-isomerase	136	2016	8.9064	5.9063	1.9349	1.6686	1.1741	1.1259	1.0358	1.0278	1.0055	1.0086	1.002	1.0059	1.0016	1.0054	1.0021
gt;MAE60260 unknown protein	256	2016	23.4369	21.7597	7.927	6.8132	4.0279	3.4177	2.5226	2.1975	1.8253	1.6443	1.4704	1.3644	1.2733	1.2106	1.161
gt;MAE42870 transposase	99	2014	3.3448	2.9646	1.0616	1.1461	0.97	0.9895	0.9498	0.9532	0.9335	0.9309	0.9166	0.9119	0.8985	0.892	0.8823
gt;MAE59510 probable glycosyl transferase	145	2014	9.6493	7.6358	2.4135	2.0713	1.3532	1.2489	1.0832	1.0407	0.9837	0.9596	0.9373	0.9217	0.9092	0.8981	0.8856
gt;MAE41760 unknown protein	349	2014	28.0918	29.6034	10.0388	13.5398	6.9759	8.9453	5.752	6.8272	5.0275	5.6135	4.5188	4.8311	4.1316	4.2858	3.8152
gt;MAE45070 hypothetical protein	102	2012	2.4061	2.997	0.9091	1.2617	0.9601	1.0725	0.9966	1.0364	1.0086	1.0276	1.0186	1.0278	1.0247	1.0287	1.0277
gt;MAE35090 enolase	176	2012	11.1914	9.293	2.7107	2.7629	1.4749	1.5565	1.1525	1.2017	1.0486	1.0746	1.008	1.0313	0.9985	1.0163	0.9992
gt;MAE33580 transposase	254	2012	28.5507	24.4753	10.2493	8.4012	5.3078	4.3612	3.2903	2.787	2.3101	2.029	1.7853	1.6223	1.4856	1.3875	1.3072
gt;MAE53030 hypothetical protein	116	2010	6.1805	5.8209	1.7795	1.5747	1.1439	1.0795	0.9952	0.969	0.9477	0.9353	0.9221	0.9119	0.9061	0.9017	0.8992
gt;MAE11630 transposase	116	2010	6.7347	5.7571	1.88	1.5491	1.1629	1.0772	1.0059	0.9775	0.9622	0.957	0.9547	0.9541	0.9539	0.9539	0.9539
gt;MAE22970 isovaleryl-CoA dehydrogenase	264	2010	26.9117	21.1933	8.4484	7.1433	4.3966	3.7989	2.8662	2.5413	2.147	1.9582	1.7629	1.6473	1.5396	1.4645	1.4017
gt;MAE03130 probable glycosyl transferase	127	2008	6.5065	5.0074	1.5426	1.4643	1.0807	1.081	1.0144	1.0213	1.0046	1.0142	1.0051	1.0132	1.0057	1.0132	1.0066
gt;MAE59750 probable tocopherol cyclase	151	2008	8.5288	7.6235	2.2524	1.9989	1.3227	1.2243	1.0873	1.0489	1.0134	0.9973	0.9826	0.9734	0.9666	0.962	0.9559
gt;MAE27670 RND multidrug efflux transporter	363	2008	33.2788	33.5807	13.2055	14.7958	8.7645	9.3219	6.7103	6.8532	5.5265	5.4987	4.7487	4.6632	4.2096	4.1096	3.814
gt;MAE62870 transglutaminase-like protein	140	2006	8.0561	7.2508	2.0548	1.9975	1.2493	1.2433	1.071	1.0767	1.031	1.0275	1.0095	1.0071	0.9996	0.9977	0.9928
gt;MAE58870 hypothetical protein	185	2006	14.918	11.1455	3.9075	3.3299	1.9788	1.8057	1.3941	1.3245	1.1711	1.139	1.0747	1.0598	1.029	1.0193	1.0011
gt;MAE34190 transposase	225	2006	21.6474	18.2379	7.0656	5.9765	3.6521	3.1111	2.3534	2.0654	1.7519	1.5899	1.4378	1.3456	1.2665	1.2152	1.1694
gt;MAE58720 hypothetical protein	156	2004	8.9978	7.8871	2.2366	1.9874	1.2788	1.1931	1.0561	1.0263	0.9927	0.9845	0.9733	0.9697	0.9646	0.9598	0.9558
gt;MAE32050 hypothetical protein	180	2004	12.4155	10.0516	3.0159	2.5957	1.5602	1.419	1.1726	1.1144	1.0381	1.0118	0.9844	0.9703	0.9613	0.9564	0.952
gt;MAE18660 Trk system potassium uptake protein	124	2002	4.4469	4.9246	1.2472	1.6025	1.0337	1.1555	1.0233	1.0738	1.0401	1.0676	1.0586	1.0716	1.0695	1.0766	1.0777
gt;MAE32310 NADH dehydrogenase subunit 5	222	2002	9.8805	7.9271	2.1778	3.0474	1.1987	1.9398	0.9424	1.4765	0.8489	1.2327	0.812	1.0883	0.7908	0.9918	0.7782
gt;MAE47600 hypothetical protein	388	2002	51.1993	50.4672	24.9004	22.8427	16.4799	14.8607	12.3541	11.2246	9.93	9.1297	8.3417	7.7589	7.2151	6.7851	6.3888
gt;MAE46190 cation transporter	166	2000	10.9246	9.857	2.9394	2.6767	1.5677	1.4659	1.1844	1.1275	1.0337	1.0012	0.9629	0.943	0.9219	0.9084	0.896
gt;MAE34500 transposase	279	2000	34.2065	30.3192	13.9329	11.9661	8.3237	7.2303	5.9332	5.3049	4.6968	4.312	3.9685	3.7217	3.5048	3.3318	3.1853
gt;MAE59800 potassium-transporting P-type ATPase A chain	172	1998	7.2136	6.7794	1.6718	1.9622	1.1609	1.2619	1.0821	1.13	1.0861	1.1144	1.1089	1.1279	1.1344	1.1481	1.1608
gt;MAE15190 methyltransferase	202	1998	17.3139	13.3911	5.1274	4.172	2.6005	2.2063	1.7218	1.5368	1.3509	1.2645	1.183	1.1373	1.0993	1.0789	1.0584
gt;MAE26850 amino-acid ABC-transporter permease protein	179	1996	7.6238	5.9369	1.4692	2.0654	1.0118	1.3944	0.9798	1.1959	1.0082	1.1322	1.0441	1.1229	1.078	1.1339	1.1125
gt;MAE13900 cysteine desulfurase	214	1996	11.4755	8.5476	2.3678	2.6954	1.1462	1.6596	0.9084	1.3344	0.878	1.1994	0.9027	1.1291	0.9285	1.0901	0.9496
gt;MAE45460 transposase	277	1996	34.9228	31.4991	14.9891	13.0457	9.2959	8.1618	6.769	6.0879	5.4051	4.9675	4.5707	4.2744	4.0108	3.8027	3.6176
gt;MAE21960 ABC-2 type transport system permease protein	85	1994	1.892	2.3376	0.9078	1.1597	0.9801	1.0574	1.0155	1.0454	1.0314	1.0476	1.0398	1.0516	1.049	1.0568	1.0567
gt;MAE56350 hypothetical protein	117	1994	5.1839	4.101	1.277	1.3843	0.9958	1.0879	0.9749	1.0285	0.9734	1.0081	0.971	0.9974	0.9673	0.9909	0.9629
gt;MAE31480 aminopeptidase	369	1994	42.7538	42.2872	18.9987	18.7926	12.52	12.0127	9.469	8.974	7.6978	7.2765	6.5344	6.1928	5.7185	5.441	5.1148
gt;MAE18900 ABC-transporter ATP-binding protein	121	1992	8.3102	5.5803	1.9541	1.582	1.1821	1.1124	1.0529	1.0415	1.0308	1.0336	1.0347	1.0397	1.0424	1.0473	1.0526
gt;MAE04830 transposase	179	1992	14.5105	13.4923	4.5373	3.6236	2.2053	1.8468	1.4899	1.3418	1.2213	1.1495	1.0952	1.0536	1.0259	1.0065	0.9915
gt;MAE05230 citrate synthase	158	1990	9.5354	7.5141	2.292	2.0509	1.2908	1.2606	1.0663	1.0771	1.0061	1.0191	0.9912	0.9998	0.9858	0.9931	0.982
gt;MAE36800 hypothetical protein	136	1988	7.5412	6.2144	1.7887	1.6295	1.1305	1.0924	0.9993	0.9808	0.9533	0.9393	0.9225	0.9098	0.8964	0.8861	0.8781
gt;MAE34140 transposase	174	1986	16.5733	12.6014	4.6981	3.6518	2.2866	1.9104	1.5454	1.3994	1.2771	1.2197	1.1765	1.1524	1.1369	1.1276	1.1203
gt;MAE36710 hypothetical protein	136	1984	8.2316	7.0005	2.2322	1.9219	1.3178	1.2175	1.0939	1.0605	1.0244	1.0076	0.9916	0.9792	0.9701	0.9598	0.9508
gt;MAE28950 hypothetical protein	210	1984	17.6551	13.7693	4.6742	3.8153	2.2651	1.9452	1.5143	1.3736	1.2137	1.1409	1.0723	1.0384	1.0059	0.9848	0.9641
gt;MAE60680 cobalamin biosynthesis protein M	63	1982	0.9239	1.563	0.829	1.1057	0.9401	1.041	0.9788	1.023	0.994	1.0161	1.0037	1.0122	1.0088	1.011	1.0108
gt;MAE06390 methyltransferase	99	1982	3.5455	3.7128	1.1553	1.2655	1.014	1.0581	1.0191	1.0447	1.045	1.0635	1.0748	1.0935	1.1094	1.1284	1.1465
gt;MAE36190 hypothetical protein	181	1982	18.1655	14.2579	5.741	4.304	2.8048	2.2495	1.817	1.5923	1.4372	1.3421	1.2796	1.2383	1.2132	1.1945	1.1833
gt;MAE32690 acetyl-CoA synthetase	349	1982	33.5722	30.5082	13.0624	13.0564	8.1155	8.3197	5.9902	6.2202	4.8594	5.0463	4.1763	4.3056	3.7204	3.7996	3.3945
gt;MAE56910 zinc-containing alcohol dehydrogenase superfamily	132	1980	6.2961	4.6675	1.3718	1.5046	0.9987	1.1312	0.9714	1.0487	0.9736	1.0217	0.9763	1.0067	0.9738	0.9965	0.9701
gt;MAE03560 tetratricopeptide repeat protein	280	1980	29.5557	26.5531	11.5548	10.1752	6.8217	5.9637	4.7473	4.2219	3.6501	3.3164	2.9963	2.7772	2.5796	2.4252	2.2892
gt;MAE44970 hypothetical protein	144	1978	10.8838	7.4291	2.6296	2.192	1.4291	1.3153	1.113	1.0762	1.012	0.9903	0.968	0.9549	0.9436	0.9353	0.9302
gt;MAE62690 aspartate beta-semialdehyde dehydrogenese	133	1976	6.3325	6.0765	1.6776	1.8525	1.1331	1.2129	1.0106	1.0415	0.9745	0.9871	0.9589	0.9653	0.9524	0.9543	0.9491
gt;MAE44070 transposase	171	1976	13.3585	11.8619	4.0159	3.22	1.9743	1.6659	1.3545	1.2372	1.1444	1.1007	1.0667	1.0509	1.0401	1.0323	1.0283
gt;MAE53170 ABC-transporter ATP-binding protein	236	1976	22.1092	17.1993	6.1846	5.1344	2.9677	2.4982	1.8581	1.6314	1.3956	1.2885	1.1863	1.1347	1.085	1.0597	1.0386
gt;MAE45890 pentapeptide repeat containing protein	84	1974	3.617	2.6159	1.1307	1.1308	1.0281	1.0552	1.0583	1.0859	1.1111	1.1334	1.1528	1.1746	1.1856	1.1945	1.1999
gt;MAE47890 ribulose bisphosphate carboxylase large subunit	233	1974	24.1732	18.7749	7.2847	5.8492	3.5123	2.919	2.1795	1.8921	1.5959	1.4448	1.3014	1.214	1.1384	1.0847	1.0375
gt;MAE42880 transposase	85	1972	3.0015	2.8121	1.1179	1.1033	1.0023	0.9927	0.9871	0.9851	0.9846	0.9845	0.9845	0.9845	0.9845	0.9845	0.9845
gt;MAE12950 cation-transporting P-type ATPase	356	1972	30.3587	29.6993	11.1729	12.9642	7.4217	8.2598	5.7625	6.1585	4.8043	4.9913	4.1748	4.2582	3.7292	3.7567	3.3938
gt;MAE40150 hypothetical protein	316	1972	34.4505	31.143	13.8487	12.5971	8.4859	7.6917	6.1459	5.622	4.8839	4.524	4.1076	3.8507	3.5816	3.3903	3.2058
gt;MAE13270 hypothetical protein	85	1970	2.4913	2.4112	0.994	1.104	0.9625	0.9737	0.9294	0.9188	0.8949	0.8838	0.8658	0.8588	0.8425	0.8324	0.8203
gt;MAE20630 transposase	181	1970	16.4879	12.0704	4.4726	3.6158	2.1281	1.8994	1.432	1.3507	1.173	1.1276	1.0523	1.0234	0.9843	0.9641	0.941
gt;MAE62670 hypothetical protein	264	1970	24.8778	21.8058	8.482	7.852	4.7721	4.4106	3.2691	3.0112	2.4851	2.2974	2.0142	1.8818	1.7157	1.6151	1.5091
gt;MAE24350 RNA-binding S4	132	1968	6.3217	5.9408	1.5815	1.7073	1.1343	1.1848	1.0559	1.0762	1.0426	1.0564	1.0508	1.0595	1.063	1.0752	1.0853
gt;MAE54140 hypothetical protein	172	1968	12.8959	11.9534	3.6591	3.1236	1.8136	1.594	1.2932	1.2138	1.1375	1.1144	1.0965	1.0938	1.0913	1.0928	1.0953
gt;MAE06680 putative DNA helicase	335	1968	37.9518	37.4006	16.8407	16.4049	10.9339	10.5005	8.2471	7.8894	6.732	6.4328	5.749	5.504	5.0618	4.8547	4.5466
gt;MAE59170 CP12 polypeptide	93	1966	3.501	3.0464	1.15	1.1764	1.0389	1.0606	1.056	1.074	1.0861	1.1017	1.118	1.1387	1.1541	1.1719	1.1816
gt;MAE13230 phenazine biosynthesis protein	112	1966	3.9502	3.683	1.1035	1.2776	0.9818	1.0522	0.9892	1.012	0.9963	1.0025	0.9984	0.9988	0.9985	0.9974	0.9988
gt;MAE57020 hypothetical protein	116	1966	5.6785	5.7282	1.6441	1.5934	1.1211	1.0998	1.0115	0.9963	0.9755	0.9724	0.9667	0.9652	0.9623	0.9608	0.9598
gt;MAE27680 efflux transporter MFP subunit	212	1966	17.6367	17.4748	5.8859	5.2974	3.0013	2.6626	1.9708	1.7902	1.5203	1.4152	1.2962	1.2349	1.1684	1.1253	1.0874
gt;MAE36520 transposase	211	1966	22.8254	19.9538	8.3586	6.7221	4.3768	3.6014	2.8153	2.4224	2.0813	1.8662	1.6924	1.571	1.4715	1.3963	1.3361
gt;MAE40250 putative flavin-containing monoamine oxidase	177	1964	12.1763	10.0475	3.2155	2.646	1.6649	1.4437	1.224	1.144	1.0837	1.0562	1.0369	1.0276	1.0209	1.0184	1.0163
gt;MAE61440 hypothetical protein	250	1964	27.5645	22.9828	9.9654	8.1833	5.3853	4.5204	3.5518	3.081	2.6435	2.3662	2.1269	1.9557	1.8081	1.6902	1.5924
gt;MAE18240 cob(I)alamin adenosyltransferase	100	1960	4.4527	3.7905	1.336	1.2235	1.0682	1.0677	1.0667	1.0808	1.0888	1.0926	1.0938	1.0952	1.0959	1.0963	1.0971
gt;MAE18880 ABC-transporter substrate-binding protein	117	1960	4.7013	3.9273	1.2621	1.3097	1.0526	1.0588	1.0178	1.0204	1.0097	1.0109	1.0064	1.0091	1.005	1.0072	1.0043
gt;MAE50170 ATP synthase CF1 gamma chain AtpC	124	1958	5.9251	5.1887	1.5273	1.567	1.099	1.1155	1.0164	1.0195	0.9939	0.9933	0.9856	0.986	0.9822	0.9826	0.9804
gt;MAE47050 transposase	132	1958	8.0561	7.1146	2.1967	1.8211	1.2553	1.1642	1.0766	1.0555	1.0451	1.0426	1.0417	1.0413	1.0412	1.0412	1.0412
gt;MAE14180 dihydroorotase	173	1958	11.4335	10.4627	3.4356	3.0273	1.8995	1.7083	1.4169	1.3291	1.2277	1.1812	1.1406	1.1155	1.096	1.0814	1.0708
gt;MAE14350 transcription termination factor NusA	175	1958	15.7392	11.4052	4.4445	3.4209	2.1499	1.7903	1.4319	1.2865	1.1594	1.0961	1.0436	1.0149	0.9888	0.9743	0.9588
gt;MAE41870 hypothetical protein	88	1956	3.3961	3.0629	1.1332	1.1645	1.0374	1.0545	1.0425	1.054	1.0506	1.0611	1.061	1.0674	1.0687	1.0712	1.0716
gt;MAE52910 cysteine desulfurase like	149	1956	6.2261	5.543	1.3958	1.7786	0.9845	1.2489	0.9653	1.1269	0.9959	1.0921	1.0246	1.08	1.0419	1.0746	1.0548
gt;MAE56860 hypothetical protein	133	1954	7.3855	6.4241	2.0509	1.8022	1.2843	1.2227	1.1136	1.1006	1.0758	1.075	1.0708	1.0757	1.0803	1.0877	1.0952
gt;MAE37090 heat shock protein 40	143	1954	8.6573	7.3396	2.3455	2.1948	1.3971	1.3516	1.1487	1.1343	1.0693	1.0644	1.0388	1.0412	1.0271	1.031	1.0238
gt;MAE11950 glutamyl-tRNA(Gln) amidotransferase subunit A	209	1954	15.8194	14.5184	4.5161	4.0549	2.1931	2.0037	1.4721	1.3855	1.1951	1.1486	1.0692	1.0421	1.0051	0.9895	0.9724
gt;MAE19270 glutamate--ammonia ligase	198	1954	17.8244	14.2518	5.1237	4.3724	2.5683	2.2422	1.706	1.5429	1.3464	1.2626	1.1747	1.1255	1.0863	1.0582	1.0374
gt;MAE45470 transposase	167	1952	13.3168	11.3081	3.8877	3.0842	1.9605	1.6591	1.3819	1.2586	1.1669	1.1131	1.0759	1.0507	1.0327	1.0196	1.0068
gt;MAE30510 serine protease HtrA	188	1952	13.3748	12.7901	3.8483	3.5711	2.0026	1.8894	1.4502	1.3873	1.2265	1.1869	1.1162	1.0866	1.0459	1.0196	0.9947
gt;MAE60180 arylsulfatase like	315	1952	35.2426	33.3017	15.2435	13.937	9.2138	8.5441	6.5233	6.1706	5.0889	4.8734	4.2242	4.0754	3.6535	3.5432	3.2594
gt;MAE41530 glycosyl transferase family 2	140	1950	7.7867	6.5213	1.8464	1.7578	1.1731	1.1465	1.0329	1.0144	0.9821	0.9711	0.9555	0.9456	0.9378	0.9288	0.9228
gt;MAE24070 ABC-transporter ATP-binding protein	274	1950	27.7362	24.2837	10.6073	9.3872	6.2993	5.5135	4.4063	3.9191	3.3984	3.088	2.7929	2.5862	2.397	2.2511	2.1204
gt;MAE57870 putative hydrogenase expression/formation protein HypB	113	1948	6.1721	4.4605	1.5014	1.4455	1.0595	1.0597	0.9623	0.963	0.9218	0.9219	0.9049	0.9007	0.8913	0.887	0.8776
gt;MAE02680 precorrin-6y C5,15-methyltransferase (decarboxylating) (EC 2.1.1.132)	161	1948	8.6881	7.7874	2.1106	2.1451	1.2815	1.2981	1.087	1.0897	1.0253	1.0249	0.9987	0.9974	0.9866	0.9873	0.9811
gt;MAE35430 transposase	179	1948	20.3954	16.3298	6.9341	5.2279	3.3807	2.6635	2.0707	1.7468	1.5032	1.3548	1.2444	1.1667	1.1139	1.0715	1.0421
gt;MAE24240 septum formation protein	76	1946	1.9599	2.0481	0.9318	1.076	0.9719	1.0098	0.9828	0.9968	0.983	0.9889	0.982	0.9831	0.98	0.9795	0.9785
gt;MAE53390 polyribonucleotide nucleotidyltransferase	297	1946	30.5107	27.0646	11.2959	10.6318	6.7568	6.3945	4.877	4.6171	3.8716	3.6718	3.2505	3.0887	2.8259	2.6996	2.5229
gt;MAE22280 hypothetical protein	109	1944	6.1601	4.9474	1.6215	1.4499	1.1179	1.0919	1.0514	1.0496	1.0469	1.0461	1.0459	1.0458	1.0458	1.0458	1.0458
gt;MAE17090 GTP-binding protein ERA homolog	137	1944	8.4495	6.6086	2.1009	1.773	1.2433	1.1434	1.0359	0.9975	0.9656	0.9507	0.937	0.9281	0.9177	0.9091	0.9019
gt;MAE51960 transcriptional regulator	159	1944	14.4814	10.6153	3.9213	3.0744	1.9625	1.6769	1.399	1.2947	1.2113	1.1761	1.1508	1.1402	1.1343	1.1311	1.131
gt;MAE33910 hypothetical protein	101	1942	2.5126	2.6045	0.8295	1.25	0.8942	1.109	0.9645	1.0788	1.0071	1.0762	1.0361	1.0804	1.059	1.0865	1.078
gt;MAE46730 hypothetical protein	141	1942	9.4411	7.6472	2.4521	2.128	1.3717	1.2569	1.0884	1.039	0.9912	0.9696	0.9522	0.9413	0.9334	0.9257	0.9194
gt;MAE25410 hypothetical protein YCF53	100	1940	3.8482	3.6223	1.177	1.2125	1.0123	1.0186	0.996	0.9932	0.9864	0.9841	0.9793	0.9764	0.9714	0.9677	0.9611
gt;MAE23420 transposase	172	1940	14.2191	12.8667	4.6091	3.7849	2.3806	2.0236	1.6221	1.45	1.2923	1.2082	1.1393	1.0989	1.0685	1.0468	1.0327
gt;MAE31170 ABC-transporter membrane fusion protein	218	1940	16.5392	14.575	4.6203	4.3426	2.4111	2.2315	1.6419	1.5349	1.3091	1.2483	1.1523	1.1154	1.0681	1.0477	1.0224
gt;MAE12730 ASPIC/UnbV domain protein	278	1940	27.6172	23.3352	8.8885	7.7292	4.578	3.9888	2.9181	2.5874	2.1299	1.9279	1.7039	1.5764	1.4568	1.3739	1.303
gt;MAE43330 PhoH like protein	149	1938	10.0875	6.9263	2.2568	1.891	1.2751	1.1902	1.0586	1.032	0.9921	0.9831	0.9669	0.9642	0.9559	0.9524	0.9493
gt;MAE35680 probable RNA methyltransferase	198	1938	19.8017	15.9866	6.5448	5.2535	3.3106	2.718	2.083	1.7938	1.5254	1.375	1.2419	1.1574	1.0862	1.0366	0.9953
gt;MAE20310 hypothetical protein	131	1936	5.9271	5.2742	1.5374	1.5013	1.0688	1.0676	0.9803	0.9829	0.9494	0.9509	0.9328	0.93	0.9192	0.9146	0.9053
gt;MAE58990 hypothetical protein	161	1936	8.5165	7.8697	2.4101	2.37	1.4385	1.4396	1.1651	1.1744	1.0709	1.0783	1.0282	1.0349	1.009	1.0155	0.9988
gt;MAE15970 dihydroorotate dehydrogenase	158	1936	9.986	9.1047	2.7487	2.6533	1.5596	1.5711	1.235	1.2484	1.1067	1.1036	1.0364	1.0272	0.99	0.9832	0.9652
gt;MAE37470 cation-transporting P-type ATPase	354	1936	35.3591	33.716	13.9762	14.8428	9.1919	9.6301	7.1541	7.3068	6.0029	6.0055	5.2306	5.172	4.6759	4.5887	4.2555
gt;MAE17330 hypothetical protein	354	1936	36.2385	38.4845	15.8883	17.1741	10.7978	10.9546	8.3415	8.157	6.871	6.6116	5.8947	5.6481	5.2046	4.9937	4.6973
gt;MAE25010 pleiotropic regulatory protein homolog	149	1934	7.6505	7.6777	2.0776	2.1777	1.3057	1.3161	1.0967	1.0861	1.0178	1.0043	0.9813	0.9729	0.9635	0.9566	0.9506
gt;MAE03100 unknown protein	178	1934	13.7588	11.1926	3.8243	3.2682	1.9269	1.748	1.3543	1.2857	1.1414	1.113	1.0521	1.0375	1.0067	1.0002	0.9845
gt;MAE38800 serine hydroxymethyltransferase	183	1934	14.6255	11.1256	3.9299	3.1054	1.9183	1.6358	1.3287	1.2226	1.1229	1.0849	1.0491	1.037	1.0187	1.0183	1.007
gt;MAE26700 hypothetical protein	84	1932	5.2586	3.4741	1.3999	1.2345	1.0561	1.0328	1.0045	0.9963	0.9857	0.9775	0.968	0.96	0.9488	0.9394	0.931
gt;MAE02620 phosphoenolpyruvate synthase	348	1932	34.3524	31.7073	13.0749	13.2666	8.2123	8.253	6.1284	6.0551	4.9814	4.8535	4.2458	4.1017	3.7272	3.5904	3.3457
gt;MAE53100 zeta-carotene desaturase	214	1930	17.5475	14.6644	4.7978	4.3199	2.3891	2.2176	1.6211	1.5406	1.3083	1.261	1.1635	1.1326	1.0849	1.0633	1.0399
gt;MAE20080 perosamine synthetase	149	1928	10.6144	8.2004	2.7069	2.4766	1.529	1.4853	1.2125	1.1859	1.0866	1.0678	1.0233	1.012	0.9921	0.9836	0.9712
gt;MAE50180 putative calcium binding hemolysin protein	95	1926	3.8308	3.5564	1.2137	1.212	1.0381	1.0616	1.0503	1.0753	1.085	1.1068	1.1246	1.1432	1.154	1.1609	1.1631
gt;MAE42210 NADH dehydrogenase subunit 4	180	1926	7.0692	5.2613	1.2196	2.0344	0.8023	1.4085	0.7868	1.1683	0.7913	1.0319	0.7915	0.9431	0.782	0.878	0.7609
gt;MAE34640 transposase	96	1924	4.9391	3.9521	1.4092	1.2535	1.0449	1.0098	0.981	0.9737	0.9701	0.9684	0.9677	0.9675	0.9674	0.9674	0.9674
gt;MAE58750 transcriptional regulator	132	1924	7.6555	5.6757	1.7713	1.6068	1.1476	1.1137	1.0303	1.0205	1.0006	0.9979	0.9924	0.9916	0.9891	0.9885	0.9881
gt;MAE48920 protein of unknown function DUF482	172	1924	12.6565	9.2308	3.0914	2.609	1.5617	1.4526	1.1744	1.1443	1.057	1.0522	1.0202	1.0225	1.0107	1.0156	1.0084
gt;MAE17360 unknown protein	313	1924	39.1485	35.6202	16.4721	14.2852	9.883	8.6238	7.0112	6.2549	5.4727	4.9888	4.5368	4.2064	3.916	3.6822	3.4746
gt;MAE21170 class I/II aminotransferase	178	1922	13.3667	13.1175	4.409	3.8632	2.346	2.0424	1.628	1.4667	1.3138	1.2315	1.16	1.1125	1.0715	1.0404	1.0127
gt;MAE44310 glycolate oxidase Fe-S subunit	192	1922	13.932	13.4091	4.3867	3.9464	2.338	2.0831	1.6258	1.4923	1.3226	1.2487	1.1708	1.1249	1.0851	1.0573	1.0309
gt;MAE52900 group 2 RNA polymerase sigma factor SigE	192	1922	16.2782	14.2682	4.8103	3.8332	2.2687	1.8974	1.4958	1.3534	1.2291	1.1743	1.1294	1.1104	1.0973	1.0932	1.0889
gt;MAE53900 mechanosensitive ion channel homolog	213	1918	12.1213	10.4423	2.9411	3.3605	1.7406	1.9502	1.3617	1.4768	1.2162	1.2807	1.1506	1.1909	1.1194	1.1477	1.11
gt;MAE56290 hypothetical protein	230	1918	19.7206	14.203	5.3029	4.6562	2.6222	2.5038	1.747	1.7365	1.3929	1.4092	1.2419	1.2617	1.1768	1.1932	1.1505
gt;MAE17210 H+/Ca2+ exchanger	96	1916	1.5027	2.0273	0.6074	1.3196	0.7826	1.138	0.8663	1.0301	0.874	0.9468	0.8372	0.8774	0.8	0.8232	0.7641
gt;MAE60660 zinc-binding CMP/dCMP deaminase	64	1916	1.6647	1.9224	1.0136	1.0473	1.0073	1.011	1.011	1.0161	1.0189	1.024	1.0288	1.0323	1.036	1.0424	1.0474
gt;MAE59030 ATPase-like protein	87	1916	3.482	3.1187	1.1492	1.1504	1.0077	1.0151	0.9913	0.9917	0.9785	0.9739	0.9611	0.9522	0.9406	0.9294	0.917
gt;MAE26680 hypothetical protein	79	1914	3.6333	2.8777	1.2107	1.14	1.0368	1.0362	1.032	1.04	1.0439	1.0489	1.0522	1.0565	1.0596	1.0614	1.0628
gt;MAE46850 transposase	190	1912	19.1424	14.9612	6.1067	4.8241	3.0734	2.5647	1.9918	1.7521	1.5105	1.381	1.2616	1.1869	1.1191	1.0746	1.0352
gt;MAE39860 type I restriction enzyme EcoEI M protein	255	1912	27.9622	23.7206	10.3689	8.9645	6.0383	5.3378	4.3162	3.9207	3.4532	3.2071	2.9521	2.7895	2.6295	2.5113	2.3992
gt;MAE17610 similar to phosphoenolpyruvate synthase	341	1912	31.8746	29.6729	12.795	12.9255	8.0698	8.2576	5.9794	6.1368	4.8262	4.9223	4.0947	4.1399	3.5873	3.5968	3.2106
gt;MAE57210 hypothetical protein	315	1912	36.5056	34.3864	15.5037	14.4537	9.8237	9.0644	7.3065	6.7579	5.9065	5.5056	5.0229	4.7247	4.4206	4.1985	3.9827
gt;MAE45810 unknown protein	91	1910	2.8878	2.4986	0.9792	1.1144	0.9461	1.001	0.9449	0.9706	0.9375	0.9541	0.9285	0.935	0.9193	0.9172	0.9077
gt;MAE37150 polysaccharide export protein	149	1910	8.641	7.0757	2.1056	1.9962	1.2758	1.2534	1.0848	1.0862	1.0403	1.045	1.0303	1.0353	1.0321	1.0357	1.0344
gt;MAE38650 McyI protein	136	1908	7.3183	6.2475	1.8449	1.6319	1.152	1.094	1.011	0.9925	0.9719	0.9634	0.9548	0.9492	0.9458	0.9423	0.9389
gt;MAE45250 group 2 RNA polymerase sigma factor SigD	174	1908	15.5321	12.6061	4.3158	3.3133	2.0054	1.6632	1.3376	1.2071	1.1011	1.0473	1.0061	0.9842	0.9665	0.9582	0.9532
gt;MAE38270 transposase	194	1906	19.6032	16.0771	6.3915	4.9734	3.1289	2.5205	1.9655	1.6908	1.4756	1.3452	1.2503	1.185	1.136	1.1006	1.0774
gt;MAE09310 hypothetical protein	85	1904	1.8845	2.1952	0.853	1.1405	0.9306	1.0353	0.9696	1.0166	0.9887	1.0162	0.991	1.0143	0.9913	1.0136	0.9907
gt;MAE28350 cysteinyl-tRNA synthetase	241	1904	28.5645	24.2637	10.944	9.0707	6.194	5.2549	4.2656	3.7631	3.3126	3.0215	2.7719	2.5841	2.4305	2.3075	2.2031
gt;MAE52730 AvaI restriction endonuclease-homolog	136	1902	7.2168	6.9937	1.9914	1.8506	1.2227	1.1643	1.04	1.0077	0.9747	0.9595	0.9463	0.9405	0.9343	0.9289	0.9213
gt;MAE57910 hypothetical protein	138	1902	9.2587	6.995	2.2724	1.9247	1.3308	1.242	1.1326	1.1189	1.1019	1.1104	1.1131	1.1233	1.1282	1.1315	1.1329
gt;MAE48870 ATPase	223	1902	20.9283	16.9843	6.5155	5.8513	3.6023	3.2214	2.4375	2.1891	1.842	1.6805	1.5041	1.3995	1.296	1.2288	1.1687
gt;MAE39790 cation-transporting P-type ATPase PacL	316	1902	24.2474	21.2706	8.0171	9.0423	5.0002	5.8585	3.8983	4.5045	3.3576	3.7896	3.0405	3.3455	2.8272	3.0494	2.6734
gt;MAE49220 RNA polymerase ECF-type (group 3) sigma-E factor	94	1900	4.167	3.8155	1.2372	1.2374	1.011	1.0065	0.966	0.9629	0.9544	0.9522	0.9493	0.9485	0.9481	0.9479	0.947
gt;MAE56800 PBS lyase heat-like repeat	98	1900	4.2006	3.1882	1.1537	1.1847	0.9865	0.9813	0.9369	0.9304	0.9112	0.9062	0.8953	0.8906	0.8842	0.8809	0.8767
gt;MAE39310 transposase	120	1900	6.3962	6.0736	1.918	1.7332	1.2433	1.1803	1.0927	1.0759	1.0586	1.056	1.0574	1.0622	1.0677	1.0742	1.0819
gt;MAE00710 putative aldo/keto reductase	144	1900	8.1528	7.8608	2.2173	2.1292	1.3275	1.2746	1.099	1.0685	1.0149	0.9984	0.9768	0.9641	0.9514	0.9394	0.9297
gt;MAE38540 hypothetical protein	288	1900	32.4784	30.912	14.1492	13.3485	8.9828	8.4138	6.6456	6.2327	5.337	5.0284	4.5054	4.2664	3.9325	3.7447	3.5152
gt;MAE42540 histidine biosynthesis bifunctional protein HisIE	94	1898	3.4899	2.9613	1.0628	1.16	0.9687	0.9903	0.9369	0.9303	0.9039	0.8946	0.8796	0.8704	0.8583	0.8516	0.8414
gt;MAE15000 probable DNA methyltransferase	142	1898	10.5922	9.0289	3.064	2.4147	1.5907	1.3788	1.2051	1.1402	1.0974	1.0762	1.0628	1.057	1.0535	1.0512	1.0505
gt;MAE39000 acyl-[acyl-carrier-protein]--UDP-N-acetylglucosamine o-acyltransferase	131	1896	7.849	5.8779	1.8692	1.6208	1.1758	1.1119	1.0304	1.0045	0.9776	0.9624	0.9425	0.9245	0.9072	0.8912	0.8749
gt;MAE26590 hypothetical protein	198	1894	17.752	13.3686	4.8513	3.7185	2.3095	1.8795	1.5053	1.3415	1.2137	1.1495	1.1044	1.0747	1.0564	1.0436	1.0336
gt;MAE50840 putative diflavin flavoprotein A 1	235	1894	23.0016	19.3151	7.7704	6.5981	4.1465	3.5621	2.7214	2.4048	2.0328	1.8459	1.6514	1.5377	1.4291	1.3576	1.2925
gt;MAE31350 lytic transglycosylase catalytic precursor	331	1894	38.4187	35.715	16.3024	15.3643	10.2179	9.6163	7.4874	7.0636	5.9781	5.6563	5.0299	4.7804	4.3869	4.1818	3.9122
gt;MAE13630 monocomponent sodium-dependent glutamate permease GltS	131	1892	2.9867	2.9416	0.6724	1.4838	0.7189	1.2552	0.8247	1.1505	0.905	1.0954	0.9498	1.0653	0.9714	1.0429	0.9762
gt;MAE21950 hypothetical protein	88	1892	3.3618	3.1683	1.124	1.1795	0.9907	0.9918	0.9563	0.9469	0.9355	0.9291	0.9207	0.9153	0.9098	0.9036	0.8944
gt;MAE11810 hypothetical protein	94	1892	4.4523	3.8893	1.3567	1.2586	1.0534	1.0355	1.0089	1.007	1.004	1.003	1.0037	0.9997	1.0011	0.9996	0.9997
gt;MAE44630 protein serin/threonin phosphatase	117	1892	6.488	5.3605	1.654	1.4942	1.1228	1.1	1.0586	1.0674	1.0664	1.0726	1.0747	1.0761	1.0778	1.0784	1.0784
gt;MAE19240 mannose-1-phosphate guanylyltransferase	148	1892	8.6507	6.9774	2.047	1.9009	1.2195	1.2001	1.051	1.0438	1.0044	1.0041	0.9873	0.9856	0.9778	0.9757	0.9719
gt;MAE12740 hypothetical protein	168	1892	12.1485	10.8911	3.2299	2.9745	1.7105	1.6143	1.2945	1.2515	1.147	1.1253	1.0889	1.0819	1.0693	1.0691	1.0662
gt;MAE08430 unknown protein	160	1892	13.5373	9.915	3.7326	2.9202	1.874	1.5929	1.2921	1.1729	1.0541	0.9929	0.9386	0.9066	0.8814	0.8645	0.8429
gt;MAE19430 isoamylase precursor	352	1892	41.1327	41.3288	19.3334	18.6894	12.9048	12.0942	9.7363	9.079	7.8623	7.3616	6.6375	6.2508	5.7721	5.4694	5.1373
gt;MAE21710 hypothetical protein	84	1890	3.0959	2.7512	1.1094	1.106	1.0123	1.0191	1.0121	1.0193	1.0236	1.0285	1.0361	1.0444	1.0493	1.0572	1.0661
gt;MAE38710 probable chloride channel protein	283	1890	15.9741	10.9117	3.1497	3.6443	1.3883	2.1321	0.9677	1.5681	0.857	1.2969	0.8264	1.1452	0.8078	1.0428	0.8084
gt;MAE30040 hypothetical protein	95	1888	5.2196	3.5954	1.3301	1.2353	1.0178	1.0269	0.9868	0.9918	0.9818	0.9844	0.9806	0.9815	0.9805	0.9805	0.9805
gt;MAE26210 putative lipase	137	1888	9.01	7.7161	2.2698	2.147	1.3	1.2721	1.0682	1.0598	0.9869	0.9744	0.9443	0.9333	0.9166	0.9078	0.8985
gt;MAE08670 type II restriction enzyme EcoRI homolog	155	1888	11.7429	10.4938	3.4935	2.7747	1.7416	1.4972	1.267	1.1934	1.1387	1.1166	1.1073	1.108	1.1074	1.1111	1.1132
gt;MAE04530 dimethyladenosine transferase	104	1886	3.9107	3.9576	1.2082	1.285	1.0095	1.0174	0.9747	0.9746	0.9621	0.9593	0.949	0.9456	0.9344	0.9305	0.9251
gt;MAE41900 glycosyl transferase	113	1884	6.6189	4.8257	1.6128	1.5347	1.1051	1.0797	0.9866	0.9703	0.9428	0.9367	0.9226	0.9152	0.9059	0.9032	0.9011
gt;MAE34410 transposase	198	1884	18.7137	15.1381	5.7006	4.5929	2.8564	2.3915	1.874	1.6523	1.4559	1.3458	1.2574	1.2037	1.1637	1.1383	1.1179
gt;MAE42510 thymidylate synthase	214	1884	22.5835	18.8814	7.8791	6.4358	4.1404	3.4647	2.6942	2.3503	2.0114	1.8214	1.6453	1.524	1.4219	1.3432	1.2765
gt;MAE46390 NAD-dependent epimerase/dehydratase	158	1882	9.1156	8.9572	2.4365	2.3038	1.3629	1.3152	1.1076	1.0841	1.0237	1.0056	0.9776	0.9617	0.9393	0.9247	0.9036
gt;MAE42920 CobQ/CobB/MinD/ParA nucleotide binding domain protein	205	1882	17.0052	14.0652	4.7548	4.27	2.3924	2.2472	1.6387	1.572	1.3256	1.286	1.1647	1.1355	1.0729	1.0547	1.0199
gt;MAE53330 acyl-CoA dehydrogenase	155	1880	9.7656	7.9386	2.353	2.1692	1.3334	1.2706	1.0857	1.0575	1.0079	0.998	0.9827	0.9804	0.9747	0.9733	0.971
gt;MAE30160 hypothetical protein	227	1880	21.4707	18.0787	6.8373	5.6998	3.4268	2.934	2.1994	1.9505	1.6509	1.5117	1.3612	1.2812	1.1998	1.1456	1.0957
gt;MAE54460 2-isopropylmalate synthase	274	1880	32.4673	28.2015	12.5274	10.7963	7.2708	6.2469	4.9569	4.3307	3.7108	3.3187	2.9604	2.7004	2.4767	2.2964	2.1406
gt;MAE46800 hypothetical protein	79	1878	2.5795	2.6353	0.9703	1.1672	0.9864	1.0683	1.0369	1.0756	1.0686	1.0902	1.0882	1.0926	1.0927	1.093	1.0931
gt;MAE15060 membrane-bound lytic transglycosylase A	164	1878	10.6131	9.1029	2.8098	2.593	1.6	1.4813	1.2341	1.1729	1.0847	1.0558	1.0152	0.9946	0.9724	0.9554	0.94
gt;MAE00310 amino acid transport ATP-binding protein	106	1876	4.3163	3.9025	1.2032	1.2533	1.0086	1.0106	0.9713	0.967	0.9477	0.9388	0.9273	0.9178	0.9075	0.898	0.8886
gt;MAE23600 ribose-phosphate pyrophosphokinase	120	1876	4.8566	3.8719	1.1332	1.3553	0.9594	1.0954	0.9726	1.0411	0.9868	1.0231	0.9941	1.0148	0.9971	1.0117	0.9973
gt;MAE18490 hypothetical protein	155	1876	11.6093	8.1804	2.8073	2.5374	1.5557	1.4917	1.2043	1.1798	1.0764	1.0663	1.0215	1.0204	0.9977	0.9984	0.9858
gt;MAE37180 precorrin-6x reductase CbiJ	90	1874	2.6644	2.6939	0.9908	1.1554	0.9695	1.0219	0.9773	0.9979	0.9772	0.9894	0.9748	0.9833	0.9712	0.9743	0.9659
gt;MAE28150 tRNA pseudouridine synthase B	116	1874	4.9774	4.1966	1.2748	1.346	1.0154	1.0453	0.9803	0.9882	0.9702	0.9746	0.9669	0.969	0.9657	0.9653	0.9648
gt;MAE41150 photosystem II CP43 protein	169	1874	10.7957	7.9003	2.3316	2.1134	1.2676	1.272	1.0693	1.0885	1.0321	1.0461	1.0277	1.0334	1.0275	1.0308	1.0294
gt;MAE54850 inosine-5'-monophosphate dehydrogenase (EC 1.1.1.205)	166	1874	11.0329	7.4722	2.3414	2.3916	1.3204	1.5183	1.0979	1.2427	1.0347	1.1209	1.0084	1.0577	0.9978	1.0294	0.9927
gt;MAE50540 putative arylsulfatase regulatory protein	182	1874	13.5565	13.2516	4.3335	3.7756	2.228	1.945	1.5323	1.4028	1.2668	1.2097	1.1588	1.1333	1.1122	1.1026	1.0965
gt;MAE24840 transposase	278	1874	33.638	30.0653	13.3865	11.4089	7.7087	6.5544	5.2352	4.5644	3.9375	3.5274	3.1777	2.9202	2.7014	2.5267	2.3803
gt;MAE29940 hypothetical protein	129	1872	6.2616	5.4458	1.6553	1.7552	1.1393	1.1996	1.0361	1.0721	1.0201	1.0387	1.0206	1.03	1.0251	1.0321	1.0303
gt;MAE38160 phosphofructokinase	175	1872	11.8036	10.2811	3.2015	3.0222	1.7905	1.7071	1.3575	1.3011	1.1683	1.1364	1.0789	1.0572	1.0257	1.0128	0.9971
gt;MAE30660 hypothetical protein	65	1868	1.7459	1.8795	0.9808	1.0353	0.9765	0.9844	0.9545	0.951	0.9347	0.9324	0.9241	0.9213	0.9179	0.916	0.915
gt;MAE52630 creatininase	105	1868	4.0183	3.8187	1.1832	1.259	0.9958	1.011	0.9608	0.9644	0.9451	0.9437	0.9293	0.9246	0.9114	0.9036	0.8918
gt;MAE12590 ammonium transport protein	134	1868	7.5108	6.5425	1.8303	1.8188	1.1413	1.1874	1.0212	1.0412	0.9817	0.9817	0.9548	0.9436	0.9267	0.9149	0.9012
gt;MAE17280 hypothetical protein	186	1868	14.7291	14.1696	4.9523	4.1896	2.5619	2.2181	1.7455	1.5838	1.4	1.3108	1.2335	1.1887	1.1568	1.1391	1.1231
gt;MAE50220 Na-Ca exchanger/integrin-beta4 like	329	1868	34.7087	35.8485	15.3949	15.5129	10.169	9.7978	7.6785	7.2806	6.2399	5.8989	5.3129	5.0412	4.6692	4.4454	4.1947
gt;MAE27760 hypothetical protein	290	1868	36.316	33.815	16.0462	14.5644	10.3578	9.3848	7.7924	7.1394	6.3446	5.8875	5.4083	5.0771	4.7509	4.4955	4.2558
gt;MAE25180 formamidopyrimidine-DNA glycosylase	134	1866	8.2437	7.1763	2.1724	2.0039	1.3187	1.2699	1.132	1.1227	1.0903	1.0993	1.1001	1.113	1.1184	1.1273	1.1317
gt;MAE40370 7-keto-8-aminopelargonic acid synthetase	152	1866	9.0715	8.0355	2.2515	2.1434	1.3004	1.2736	1.0863	1.0728	1.0199	1.0144	0.9977	0.9942	0.9872	0.9839	0.9802
gt;MAE49900 unknown protein	171	1864	10.3414	9.8774	2.9721	2.8825	1.6962	1.6051	1.2892	1.2356	1.1259	1.0985	1.0576	1.0433	1.0231	1.0152	1.0046
gt;MAE11890 tRNA-guanine transglycosylase	154	1864	11.4799	8.2752	2.6882	2.4107	1.483	1.4166	1.1652	1.1339	1.0468	1.0303	0.9958	0.988	0.9711	0.9658	0.9584
gt;MAE14420 transposase	142	1862	10.2263	8.3575	2.7385	2.2086	1.4437	1.295	1.1372	1.0892	1.0521	1.0375	1.0278	1.0246	1.0211	1.0199	1.0187
gt;MAE26730 hypothetical protein	58	1860	1.1893	1.506	0.9543	1.038	1.023	1.0488	1.0518	1.0597	1.0609	1.0635	1.0648	1.0662	1.0674	1.0676	1.0677
gt;MAE58620 zinc-binding alcohol dehydrogenase	126	1860	6.8811	6.1941	1.8175	1.7023	1.1575	1.1157	1.0042	0.9806	0.9423	0.9288	0.9116	0.8988	0.889	0.881	0.8719
gt;MAE21250 hypothetical protein	125	1860	7.1684	6.8042	1.9638	1.9029	1.2084	1.2216	1.0749	1.0929	1.0594	1.0703	1.0616	1.0674	1.0644	1.0669	1.0667
gt;MAE23940 hypothetical protein	234	1860	24.8978	20.4679	8.7375	7.5896	4.9758	4.462	3.5346	3.251	2.8296	2.6512	2.423	2.2983	2.1573	2.0655	1.965
gt;MAE46610 unknown protein	112	1858	6.1546	4.6701	1.4671	1.434	1.06	1.0641	0.986	0.9808	0.9511	0.9419	0.9248	0.9172	0.9074	0.9009	0.8962
gt;MAE15710 unknown protein	137	1858	9.6895	7.6965	2.5702	2.1493	1.4188	1.3129	1.1547	1.1382	1.1012	1.1117	1.1104	1.1265	1.1301	1.1413	1.1463
gt;MAE17150 cobalamin biosynthesis protein D	170	1858	11.9352	10.6147	3.2975	2.7353	1.6718	1.4542	1.2174	1.1271	1.0493	1.0071	0.9728	0.9509	0.9311	0.9185	0.9112
gt;MAE28320 hypothetical protein	91	1856	3.7477	3.7334	1.3002	1.2673	1.0585	1.0634	1.0488	1.0559	1.0561	1.0574	1.0573	1.0574	1.0574	1.0574	1.0574
gt;MAE41680 histidyl-tRNA synthetase	179	1856	12.0888	11.1288	3.3436	3.2191	1.7845	1.7485	1.3218	1.295	1.1339	1.1075	1.0378	1.0095	0.9721	0.9554	0.9355
gt;MAE34120 transposase	225	1856	22.8154	19.0803	7.6984	6.5929	4.1286	3.5761	2.7439	2.4314	2.0714	1.8783	1.6929	1.5714	1.464	1.3856	1.3186
gt;MAE37860 hypothetical protein	93	1854	3.3069	3.0483	1.1083	1.1456	0.9822	0.9835	0.9499	0.9427	0.9312	0.9222	0.9157	0.9125	0.9104	0.9091	0.9082
gt;MAE03280 unknown protein	117	1854	6.3629	6.2359	1.7682	1.7703	1.1758	1.1846	1.0748	1.0917	1.0709	1.0874	1.0909	1.1059	1.1163	1.1283	1.1391
gt;MAE20060 hypothetical protein YCF46	217	1852	17.5787	13.6572	4.7068	4.34	2.4439	2.3369	1.6956	1.6378	1.3674	1.3321	1.2003	1.177	1.1072	1.0901	1.0516
gt;MAE54030 1,4-alpha-glucan branching enzyme	337	1852	40.8719	40.8167	18.9561	17.8425	12.4096	11.3314	9.2744	8.4869	7.4822	6.9283	6.3435	5.9436	5.5615	5.2611	4.9877
gt;MAE26710 hypothetical protein	59	1850	1.5736	1.6981	0.9848	1.0334	1.0054	1.0216	1.0189	1.0309	1.0337	1.0411	1.0471	1.0516	1.0535	1.0565	1.0586
gt;MAE21370 hypothetical protein	148	1850	6.5885	5.3138	1.4633	1.8462	1.0445	1.2796	1.0011	1.1359	1.02	1.0966	1.0457	1.0911	1.0673	1.0936	1.0835
gt;MAE42830 hypothetical protein	165	1850	9.0048	7.6254	2.1039	2.1063	1.2177	1.2951	1.045	1.1004	1.0142	1.0418	1.0076	1.0237	1.0065	1.0123	1.0035
gt;MAE09720 type IV pilus assembly protein PilN	95	1848	3.7291	3.6276	1.1279	1.2429	0.9942	1.0291	0.9835	0.9864	0.9699	0.9655	0.9546	0.9461	0.9373	0.9309	0.9245
gt;MAE01110 transposase	108	1848	7.4847	5.5734	1.9726	1.6051	1.2024	1.1065	1.0324	1.0079	0.9915	0.9841	0.9819	0.9805	0.9801	0.9801	0.9799
gt;MAE05370 FO synthase subunit 1	136	1848	8.5009	6.6936	2.0242	1.7727	1.2229	1.1492	1.05	1.0265	1.0049	0.9967	0.9869	0.9803	0.9768	0.9738	0.972
gt;MAE52420 serine/threonine protein kinase like	171	1848	13.7314	12.5872	4.2367	3.6287	2.1982	1.9499	1.5538	1.4368	1.2987	1.2446	1.1887	1.1603	1.1374	1.1226	1.1108
gt;MAE14910 two-component response regulator OmpR subfamily	102	1846	4.3668	3.9598	1.2658	1.2827	1.0218	1.0287	0.9931	0.9948	0.9884	0.9884	0.985	0.9848	0.9832	0.9822	0.98
gt;MAE45050 putative peptidase	123	1846	5.1367	4.853	1.3575	1.5349	1.0358	1.0986	0.983	1.0039	0.9659	0.9752	0.9594	0.9637	0.9541	0.9544	0.949
gt;MAE50580 hypothetical protein	202	1844	17.4832	13.2913	4.6849	3.8537	2.2545	1.9545	1.4997	1.3728	1.2149	1.1587	1.0924	1.0674	1.0387	1.0291	1.0165
gt;MAE51830 transposase	212	1844	20.3604	19.0648	7.1094	5.8786	3.5655	2.9753	2.2562	1.9616	1.6771	1.5264	1.3927	1.306	1.2351	1.1836	1.1415
gt;MAE11860 transposase	205	1844	22.5793	20.1716	8.7586	7.1459	4.7264	3.8964	3.0622	2.6184	2.2414	1.9954	1.7972	1.6526	1.5388	1.4509	1.3808
gt;MAE61640 putative hydrogenase expression/formation protein HypF	303	1844	30.3957	27.8906	11.2333	11.5647	6.8712	7.1559	5.1181	5.2774	4.2087	4.2856	3.6624	3.6893	3.2965	3.2969	3.0426
gt;MAE57090 hypothetical protein	76	1842	1.512	1.9603	0.8079	1.1541	0.9246	1.0586	0.9715	1.0278	0.9876	1.0166	0.9918	1.009	0.9919	1.0046	0.9882
gt;MAE56490 maltose O-acetyltransferase like	92	1842	3.9428	2.9327	1.1234	1.1603	1.0103	1.0331	1.0152	1.0266	1.0264	1.0333	1.0359	1.0426	1.0493	1.0551	1.061
gt;MAE50020 geranylgeranyl hydrogenase	179	1842	12.4043	11.5286	3.5875	3.2154	1.8617	1.6807	1.3223	1.2292	1.1114	1.065	1.0102	0.9862	0.9566	0.9409	0.9243
gt;MAE19890 putative type I restriction enzyme specificity protein	172	1842	14.6207	10.7139	3.7949	3.1378	1.888	1.732	1.3529	1.3005	1.1491	1.1241	1.0552	1.0452	1.0116	1.0001	0.9788
gt;MAE49250 sulfolipid biosynthesis protein	179	1842	18.0552	13.931	5.3394	4.0774	2.5634	2.077	1.6616	1.4633	1.3205	1.2389	1.1833	1.1509	1.131	1.12	1.1144
gt;MAE58800 hypothetical protein	79	1840	2.5758	2.5602	1.0207	1.1164	1.0042	1.0386	1.0329	1.0547	1.0642	1.089	1.1046	1.1272	1.1407	1.1498	1.1532
gt;MAE46310 tRNA (guanine-N7-)-methyltransferase	86	1838	2.7374	2.7829	1.0382	1.139	0.9847	0.9998	0.9693	0.9637	0.9492	0.9398	0.9243	0.9104	0.894	0.8787	0.8653
gt;MAE51790 homoserine O-acetyltransferase	109	1836	5.7838	4.5841	1.5383	1.4023	1.1026	1.0982	1.0575	1.0769	1.0781	1.0951	1.0977	1.1051	1.1073	1.1116	1.112
gt;MAE51610 sulfate transport system substrate-binding protein	153	1836	8.8303	7.6476	2.1559	2.1991	1.235	1.328	1.0442	1.1087	1.0029	1.0463	0.9979	1.0259	1.0022	1.0176	1.0021
gt;MAE49990 hypothetical protein	180	1836	13.8023	11.7376	3.9778	3.5559	2.1588	1.9755	1.5639	1.4661	1.3139	1.2596	1.1905	1.1563	1.1211	1.1025	1.0832
gt;MAE20470 hypothetical protein	203	1836	15.6836	12.3342	4.3265	3.9043	2.2127	2.1373	1.5374	1.5374	1.2735	1.2924	1.1575	1.1756	1.1043	1.1227	1.083
gt;MAE02600 peptidase	206	1834	16.1277	16.2269	5.2226	4.5336	2.4918	2.1867	1.6034	1.4787	1.2728	1.2114	1.1261	1.092	1.0534	1.0324	1.0035
gt;MAE32140 unknown protein	330	1834	40.9566	40.1516	19.5131	17.9783	12.9443	11.7201	9.7743	8.916	7.9244	7.325	6.7226	6.2847	5.8763	5.5521	5.2547
gt;MAE62420 membrane bound O-acyl transferase	124	1830	3.3028	3.2144	0.8118	1.4316	0.829	1.1813	0.9235	1.1098	1.0014	1.1043	1.0598	1.1255	1.1126	1.162	1.165
gt;MAE59390 unknown protein	188	1830	12.4435	11.2665	3.4543	3.7857	2.07	2.1393	1.5547	1.5584	1.3141	1.3023	1.1889	1.1792	1.115	1.1105	1.0718
gt;MAE25720 deoxyribodipyrimidine photolyase-related protein	214	1830	20.958	16.2059	6.0464	4.8733	2.7728	2.3691	1.7035	1.5481	1.2936	1.2212	1.1138	1.0767	1.0239	1.0073	0.9845
gt;MAE02200 hypothetical protein	217	1830	21.279	16.1798	6.0529	5.0138	2.9297	2.5144	1.8511	1.6538	1.3977	1.2942	1.1774	1.1198	1.0591	1.0251	0.9901
gt;MAE56010 elongation factor EF-G	291	1830	32.8457	30.1948	13.8115	13.0737	8.7575	8.3488	6.4985	6.2549	5.2473	5.09	4.4731	4.3549	3.9484	3.8564	3.5753
gt;MAE06180 urea transport system ATP-binding protein	99	1828	3.702	3.6591	1.2029	1.2134	1.0229	1.0198	0.999	0.997	0.993	0.9933	0.9924	0.9917	0.9916	0.9915	0.9914
gt;MAE06720 probable inorganic polyphosphate/ATP-NAD kinase 1	110	1828	4.0543	3.7906	1.1875	1.3262	1.0207	1.0634	1.0082	1.0243	1.0124	1.0203	1.0171	1.0211	1.0212	1.0232	1.0235
gt;MAE02700 hypothetical protein	114	1828	7.4588	5.6685	1.7967	1.5261	1.1234	1.0627	0.9909	0.9711	0.9434	0.9268	0.9033	0.8893	0.8789	0.8726	0.8667
gt;MAE48830 cytochrome P450	192	1828	14.1034	13.2505	4.3778	4.364	2.4681	2.4889	1.8225	1.8297	1.5301	1.5233	1.3828	1.3716	1.2966	1.2837	1.2387
gt;MAE19870 L-argininosuccinate lyase	207	1828	20.5641	16.3956	6.4816	5.3445	3.4809	2.9834	2.3931	2.1333	1.8773	1.7264	1.5906	1.4921	1.4068	1.3399	1.2826
gt;MAE30610 hypothetical protein	82	1826	2.6454	2.6896	1.0714	1.1176	0.9967	1.0058	0.977	0.9688	0.9553	0.9428	0.9312	0.9207	0.9085	0.898	0.8879
gt;MAE32850 putative glycosyl transferase	161	1826	11.8679	8.9525	2.8941	2.4177	1.4711	1.3623	1.126	1.0958	1.0197	1.0091	0.983	0.9804	0.9707	0.9695	0.9669
gt;MAE41160 photosystem II reaction center D2 protein	115	1824	4.8112	4.1036	1.2435	1.3419	1.0223	1.057	0.9976	1.006	0.9896	0.9903	0.9836	0.9831	0.979	0.9776	0.9754
gt;MAE39220 UDP-3-O-acyl N-acetylglcosamine deacetylase	125	1824	6.4698	6.5867	1.8659	1.8931	1.214	1.23	1.0894	1.1051	1.0743	1.0897	1.0891	1.0984	1.1014	1.1079	1.1104
gt;MAE62170 transposase	109	1824	7.112	5.0951	1.7341	1.4314	1.1272	1.0919	1.0658	1.0672	1.0673	1.0675	1.0676	1.0677	1.0677	1.0677	1.0677
gt;MAE12990 two-component response regulator	150	1822	11.3651	7.9788	2.6304	2.196	1.3489	1.2886	1.0705	1.0551	0.9777	0.9641	0.9244	0.9109	0.8869	0.8795	0.8645
gt;MAE53420 transposase	159	1822	12.2963	10.9818	3.6854	2.9883	1.8793	1.6138	1.3384	1.2227	1.1262	1.0722	1.0342	1.008	0.991	0.9804	0.9735
gt;MAE16750 hypothetical protein	73	1820	2.4022	2.359	1.0844	1.0613	0.9919	0.9897	0.9751	0.9726	0.9626	0.9525	0.9473	0.9384	0.9348	0.9317	0.931
gt;MAE46790 recombination protein RecR	91	1820	4.2993	3.3978	1.1982	1.1919	1.0272	1.0501	1.0374	1.0515	1.0518	1.0521	1.0521	1.0521	1.0521	1.0521	1.0521
gt;MAE21010 transposase	179	1820	17.0451	14.7364	5.3071	4.087	2.4709	1.9909	1.5598	1.3649	1.2126	1.127	1.0576	1.0127	0.9806	0.9579	0.9412
gt;MAE23850 hypothetical protein	205	1820	17.0846	14.0632	4.7847	3.9687	2.3517	2.015	1.573	1.415	1.2598	1.1841	1.119	1.078	1.0457	1.0253	1.0084
gt;MAE36260 transposase	200	1820	25.1466	22.6456	10.7603	8.8143	6.2126	5.2047	4.2578	3.7119	3.2507	2.9276	2.6594	2.4504	2.2764	2.1321	2.0105
gt;MAE55680 phosphoheptose isomerase	85	1818	3.3556	3.4382	1.1637	1.2101	1.0297	1.0494	1.0413	1.0499	1.0507	1.0514	1.0513	1.0516	1.0513	1.0516	1.0513
gt;MAE28660 hypothetical protein	94	1818	3.4225	3.8904	1.1009	1.4983	0.9807	1.1384	0.9826	1.04	0.9857	1.0072	0.984	0.9912	0.981	0.9836	0.9797
gt;MAE40620 oligopeptides ABC-transporter permease protein	122	1818	5.4907	4.144	1.2896	1.4189	1.0406	1.083	1.0066	1.0238	1.0006	1.0128	1.0003	1.0106	1.0017	1.0109	1.0026
gt;MAE55650 hypothetical protein	128	1818	6.3817	6.201	1.7971	1.7561	1.175	1.1452	1.0199	0.9994	0.9589	0.9432	0.9166	0.9057	0.8905	0.8796	0.8692
gt;MAE33340 transposase	165	1818	12.6236	11.6914	4.0392	3.3589	2.1667	1.8909	1.5803	1.4549	1.336	1.2713	1.2195	1.1889	1.1661	1.147	1.1326
gt;MAE55910 hypothetical protein YCF50	90	1816	4.1705	3.4649	1.3111	1.1876	1.0341	1.0136	0.9958	0.9946	0.9902	0.9909	0.9891	0.9906	0.9891	0.9906	0.9891
gt;MAE45800 hypothetical protein	114	1816	7.5096	5.4767	1.8899	1.5765	1.1692	1.0913	1.0161	0.9865	0.9612	0.9461	0.9305	0.9186	0.9074	0.8934	0.8816
gt;MAE41710 transposase	189	1816	15.6725	15.9469	6.1224	5.3781	3.577	3.192	2.6372	2.4342	2.2006	2.0807	1.9554	1.8754	1.7999	1.7477	1.6968
gt;MAE16570 transposase	189	1816	19.2631	16.6282	6.4582	5.2078	3.2386	2.6919	2.0736	1.8225	1.5736	1.4437	1.3263	1.2499	1.1824	1.1372	1.0967
gt;MAE13200 putative methyltransferase	264	1816	29.5132	26.5444	11.9426	10.7006	7.4075	6.5982	5.3985	4.8721	4.2913	3.9387	3.6022	3.3502	3.1294	2.9473	2.7848
gt;MAE23870 hypothetical protein	107	1814	4.7526	4.8528	1.4535	1.4362	1.0835	1.0877	1.0383	1.0495	1.0471	1.0635	1.0719	1.0916	1.1044	1.1221	1.1325
gt;MAE55660 mannose-1-phosphate guanyltransferase	107	1814	4.9631	4.6628	1.3832	1.3945	1.0514	1.0846	1.0313	1.0637	1.0566	1.0874	1.0954	1.1157	1.1243	1.1354	1.1375
gt;MAE39980 probable helicase protein	196	1814	15.461	11.4971	3.9649	3.3826	1.9799	1.7912	1.3789	1.309	1.1602	1.1338	1.0719	1.065	1.0356	1.0339	1.0203
gt;MAE04680 cell division protein FtsY	195	1814	16.1884	12.6954	4.4678	3.6965	2.2808	1.9451	1.5515	1.3915	1.2526	1.1736	1.1137	1.0727	1.0435	1.0226	1.0065
gt;MAE19340 transposase	203	1814	23.5243	21.2809	9.6129	8.2941	5.6912	4.9713	4.0592	3.6376	3.2172	2.958	2.7224	2.5504	2.3996	2.2812	2.1748
gt;MAE48980 leader peptidase I	78	1812	2.1488	2.2482	0.9751	1.0899	0.9596	0.97	0.9381	0.9332	0.9148	0.9066	0.8956	0.8881	0.8784	0.872	0.8663
gt;MAE13260 hypothetical protein	88	1812	3.1955	2.8068	1.047	1.171	0.9949	1.0495	1.0193	1.0512	1.0514	1.0785	1.086	1.1137	1.1236	1.1429	1.1492
gt;MAE15810 carboxypeptidase A2 precursor	252	1812	29.897	27.2815	12.8264	11.3177	7.9988	7.0821	5.8637	5.2925	4.7039	4.3325	3.9929	3.7411	3.5205	3.3424	3.1869
gt;MAE51720 transcriptional regulator	90	1810	3.9018	3.3306	1.2154	1.192	1.0422	1.0545	1.0505	1.0541	1.0541	1.0544	1.0544	1.0544	1.0544	1.0544	1.0544
gt;MAE59190 GCN5-related N-acetyltransferase	88	1810	4.6865	3.3027	1.2923	1.1889	1.0392	1.0305	1.0162	1.0172	1.0153	1.016	1.0157	1.0156	1.0156	1.0156	1.0156
gt;MAE06310 hypothetical protein	112	1810	5.8099	4.6935	1.4882	1.4133	1.0954	1.0943	1.0556	1.063	1.0575	1.0629	1.0628	1.0666	1.0673	1.0682	1.0684
gt;MAE10120 transposase	136	1810	6.9911	6.0807	1.7143	1.8273	1.0809	1.21	0.9726	1.0503	0.9487	0.9941	0.9425	0.9675	0.932	0.9491	0.9226
gt;MAE61510 TPR repeat protein	118	1808	9.6742	6.7545	2.6094	1.9865	1.4302	1.2784	1.157	1.1132	1.0788	1.0643	1.0513	1.0473	1.0414	1.0398	1.0363
gt;MAE46830 hypothetical protein	231	1808	20.6463	19.9276	7.4699	8.3825	4.5031	5.1963	3.371	3.8211	2.8314	3.0993	2.5203	2.6723	2.3216	2.3977	2.1744
gt;MAE13300 transposase	274	1808	34.5057	32.1661	15.5246	13.8613	9.9863	8.8938	7.428	6.7187	5.9783	5.5031	5.0602	4.7284	4.43	4.188	3.9725
gt;MAE55980 Type I restriction enzyme EcoEI M protein homolog	290	1806	34.8802	32.4354	15.2056	13.5326	9.4856	8.3787	6.8707	6.1724	5.4336	4.9727	4.5415	4.2252	3.9421	3.7149	3.5116
gt;MAE62340 transposase	119	1804	6.389	6.3022	1.9333	1.7676	1.2313	1.1755	1.0801	1.0681	1.0535	1.0557	1.0557	1.0632	1.0719	1.0817	1.0922
gt;MAE59690 hypothetical protein	163	1804	10.6579	9.4654	2.9928	2.7309	1.6092	1.5512	1.2246	1.2095	1.0867	1.0839	1.0328	1.0324	1.0057	1.0073	0.9937
gt;MAE36120 PxcA protein	171	1804	11.511	10.926	3.49	3.5049	1.9812	2.035	1.5029	1.5322	1.2928	1.2997	1.1796	1.1764	1.1065	1.0991	1.0542
gt;MAE36750 pyruvate decarboxylase isozyme 1	238	1804	22.2162	19.9058	7.4105	6.8853	4.0886	3.7378	2.7573	2.5126	2.078	1.9115	1.6862	1.574	1.4438	1.3637	1.2891
gt;MAE37390 probable ribosomal large subunit pseudouridine synthase B	128	1802	8.2518	6.9248	2.2785	1.842	1.2889	1.163	1.0557	1.0176	0.992	0.982	0.9758	0.9746	0.9739	0.9732	0.973
gt;MAE23330 anthranilate synthase component II	87	1800	2.8115	2.711	0.9938	1.1887	0.9818	1.0482	1.0133	1.0388	1.0362	1.0515	1.0604	1.0763	1.0881	1.1004	1.1158
gt;MAE62270 transposase	99	1798	6.161	3.8023	1.4324	1.3162	1.0715	1.0759	1.0427	1.0574	1.0584	1.0703	1.0788	1.0914	1.1076	1.1245	1.1401
gt;MAE20960 transposase	198	1798	18.0309	14.961	5.4839	4.3276	2.6353	2.18	1.7075	1.5113	1.34	1.2497	1.1825	1.1432	1.1104	1.0906	1.0756
gt;MAE58230 serine/threonine protein phosphatase	110	1796	5.3672	4.9746	1.5187	1.5015	1.0954	1.0897	1.0173	1.0159	0.9981	0.995	0.9874	0.9854	0.9799	0.9781	0.9732
gt;MAE23080 ABC-transporter ATP-binding protein	116	1796	5.658	5.1971	1.5353	1.5094	1.0974	1.1008	1.0316	1.0389	1.0248	1.0329	1.0318	1.04	1.0442	1.0541	1.063
gt;MAE50820 putative diflavin flavoprotein A 4	249	1796	27.8488	24.8336	11.1638	9.8853	6.5622	5.982	4.6637	4.3561	3.6926	3.5037	3.1232	2.9869	2.7483	2.6473	2.4854
gt;MAE61400 transposase	273	1796	34.0732	31.6648	14.9052	13.2926	9.3771	8.3078	6.8468	6.1578	5.4357	4.9792	4.5563	4.2381	3.9584	3.7275	3.5275
gt;MAE23320 hypothetical protein	109	1794	3.6218	3.071	0.9809	1.2737	0.942	1.0784	0.9724	1.035	0.9897	1.0229	0.9997	1.0181	1.0053	1.0181	1.0093
gt;MAE15850 glutathione S-transferase	105	1794	4.6039	3.9357	1.3297	1.2871	1.039	1.0196	0.9734	0.9642	0.9549	0.9489	0.9434	0.9382	0.9335	0.9274	0.9228
gt;MAE04840 transposase	126	1794	7.5566	7.4287	2.1787	1.9773	1.2962	1.2115	1.0716	1.0273	0.9866	0.9688	0.9541	0.9434	0.9339	0.9268	0.9224
gt;MAE23340 hypothetical protein	76	1792	1.9781	2.0383	0.9151	1.1091	0.9752	1.0421	1.0216	1.0538	1.0567	1.0798	1.0922	1.1128	1.1286	1.1445	1.1619
gt;MAE14280 phycocyanin alpha phycocyanobilin lyase related protein	95	1792	3.6878	3.4981	1.216	1.2319	1.0278	1.0309	1.0052	1.0047	0.9995	0.9984	0.9969	0.9966	0.9948	0.9955	0.9935
gt;MAE12240 hypothetical protein	118	1792	5.3341	4.9153	1.3673	1.5171	1.0269	1.0934	0.9812	1.004	0.9616	0.9681	0.948	0.9498	0.9382	0.9353	0.9295
gt;MAE35390 aspartate aminotransferase	162	1792	12.0394	9.3733	2.9699	2.588	1.5581	1.4268	1.1768	1.1173	1.0377	1.0107	0.9793	0.9639	0.9483	0.9367	0.9275
gt;MAE05440 small GTP-binding protein	189	1792	14.4857	11.2213	3.7012	3.6291	2.0135	2.0103	1.4784	1.459	1.2536	1.2341	1.1488	1.1316	1.0914	1.0786	1.0599
gt;MAE53130 3-isopropylmalate dehydratase large subunit	210	1792	20.5689	17.4353	6.488	5.7277	3.3048	2.9468	2.1453	1.9437	1.6188	1.5006	1.3474	1.2769	1.201	1.1521	1.1045
gt;MAE31750 circadian clock protein KaiC homolog	226	1792	23.9769	19.6352	7.9723	6.8943	4.3554	3.8066	2.9446	2.6217	2.2406	2.0354	1.8315	1.6955	1.5695	1.477	1.3968
gt;MAE53190 glycosyl transferase family 2	277	1792	29.4655	27.7103	12.2174	11.3628	7.69	6.9586	5.6127	5.0949	4.4581	4.0976	3.7318	3.4725	3.2358	3.0459	2.8718
gt;MAE01120 transposase	73	1790	2.5708	2.5409	1.081	1.088	1.0045	1.0108	1.0014	1.01	1.0079	1.0135	1.0137	1.0175	1.0192	1.0216	1.0229
gt;MAE07120 hypothetical protein	110	1790	5.4522	5.1259	1.5987	1.4598	1.1067	1.0824	1.0411	1.0384	1.035	1.0351	1.0351	1.0354	1.0354	1.0354	1.0354
gt;MAE30120 unknown protein	184	1790	15.2752	13.5999	4.6116	4.0353	2.3942	2.1065	1.6409	1.4971	1.3276	1.2538	1.1796	1.1446	1.1107	1.0926	1.0745
gt;MAE37200 aspartate 1-decarboxylase	77	1788	2.5238	2.3497	1.0079	1.0706	0.9717	0.9846	0.9634	0.9645	0.9567	0.9551	0.9515	0.9506	0.9486	0.9472	0.9457
gt;MAE31650 hypothetical protein	115	1788	6.4964	6.1395	1.9399	1.7577	1.2194	1.1552	1.0381	1.0091	0.9697	0.9535	0.9417	0.9361	0.9316	0.93	0.9296
gt;MAE55430 magnesium protoporphyrin IX methyl transferase	120	1788	7.3571	5.8542	1.9406	1.6002	1.1866	1.1092	1.0508	1.0345	1.027	1.0256	1.0247	1.0244	1.0243	1.0242	1.0242
gt;MAE55050 transposase	142	1788	11.6162	9.4464	3.3491	2.6244	1.6998	1.467	1.2349	1.1498	1.0745	1.0428	1.0201	1.0061	0.9982	0.994	0.9909
gt;MAE45880 hypothetical protein	75	1786	2.5399	2.1542	0.9655	1.0963	0.9492	0.998	0.9432	0.9673	0.936	0.946	0.9258	0.9277	0.9137	0.9129	0.9046
gt;MAE07830 transposase	120	1786	6.8428	6.5866	1.959	1.8082	1.2338	1.1784	1.0851	1.0776	1.0656	1.0657	1.0658	1.0671	1.0686	1.0695	1.0697
gt;MAE45340 NAD-dependent epimerase/dehydratase	134	1786	7.4456	6.9617	2.0809	1.9898	1.2945	1.24	1.0851	1.0525	1.0017	0.9766	0.9532	0.9369	0.9234	0.9115	0.8989
gt;MAE27510 putative sugar kinase	153	1786	9.7103	9.4849	2.8519	2.5058	1.5417	1.3927	1.1897	1.1407	1.0941	1.0866	1.0791	1.0831	1.0874	1.0942	1.0998
gt;MAE47140 unknown protein	255	1786	27.9026	23.8857	9.7694	8.0934	5.0323	4.1827	3.1382	2.6804	2.2247	1.9675	1.7389	1.5908	1.4599	1.3653	1.2883
gt;MAE26430 phosphomethylpyrimidine kinase	112	1784	4.8082	4.5931	1.3767	1.3554	1.0504	1.0307	0.9863	0.9736	0.9557	0.9454	0.9344	0.922	0.9108	0.8977	0.8873
gt;MAE11280 serine/threonine protein phosphatase	121	1784	6.9727	6.3251	1.9413	1.724	1.2106	1.1423	1.0587	1.0415	1.0277	1.0234	1.022	1.0214	1.0213	1.0213	1.0213
gt;MAE53740 exopolyphosphatase	224	1784	16.2186	15.0473	4.7904	5.0923	2.564	2.8587	1.8414	2.0302	1.531	1.6357	1.3689	1.4215	1.267	1.2908	1.2007
gt;MAE06260 glycogen synthase	201	1784	16.8084	13.3431	4.7276	4.0044	2.3843	2.1238	1.6235	1.5086	1.3129	1.2625	1.1737	1.1506	1.1016	1.0943	1.0663
gt;MAE13760 transposase	198	1784	22.5496	18.561	8.6885	7.0218	4.9898	4.2069	3.4963	3.084	2.7483	2.5068	2.3142	2.1637	2.0353	1.9342	1.8477
gt;MAE09460 putative phosphoesterase	252	1784	23.9161	20.9824	8.4138	8.7603	5.332	5.61	4.1	4.2347	3.4186	3.4584	2.9639	2.9604	2.6382	2.6137	2.3884
gt;MAE10900 hypothetical protein	166	1782	13.0244	11.1787	3.8232	3.3372	2.016	1.8683	1.4726	1.4087	1.2613	1.2325	1.1725	1.1571	1.1301	1.1188	1.1071
gt;MAE54430 ATP-dependent DNA helicase DinG	192	1782	14.54	12.3705	4.3253	3.6382	2.2273	1.9303	1.5274	1.3947	1.2517	1.1889	1.1321	1.1027	1.0766	1.0603	1.0502
gt;MAE58510 hypothetical protein	186	1782	22.1893	17.2845	7.894	6.0858	4.1443	3.3892	2.7358	2.3818	2.0956	1.91	1.7635	1.6559	1.5702	1.5022	1.4472
gt;MAE56020 hypothetical protein	177	1780	8.275	7.0134	1.78	2.2591	1.1693	1.4242	1.0601	1.1951	1.056	1.1301	1.0753	1.1163	1.0979	1.1229	1.1195
gt;MAE38450 phosphoribulokinase	161	1780	13.8662	11.0411	3.7761	2.9349	1.8292	1.5519	1.2998	1.2129	1.1451	1.1187	1.0997	1.0918	1.0867	1.085	1.0829
gt;MAE58060 hypothetical protein	192	1778	14.3393	12.4626	4.1289	3.7676	2.025	2.032	1.4055	1.4707	1.18	1.2407	1.0883	1.1353	1.0434	1.0824	1.0257
gt;MAE35410 transposase	179	1778	21.4435	17.6951	7.7548	5.9447	3.8866	3.0745	2.3873	2.0046	1.7103	1.5152	1.3652	1.2569	1.1712	1.1054	1.0528
gt;MAE08280 dihydroorotase	139	1776	7.5635	6.8531	1.9485	1.8655	1.2092	1.1732	1.0297	1.0077	0.9656	0.9541	0.9371	0.9306	0.9237	0.9179	0.9103
gt;MAE38990 hypothetical protein	191	1776	18.7756	14.1608	5.9393	4.8005	3.1054	2.6272	2.0634	1.8338	1.5931	1.4746	1.3598	1.2949	1.2317	1.1957	1.1611
gt;MAE24480 phycobilisome rod linker polypeptide	128	1774	7.4972	6.8019	2.1635	1.9435	1.3029	1.2314	1.0885	1.0591	1.0194	1.0068	0.9933	0.9865	0.9803	0.9772	0.9742
gt;MAE24160 hypothetical protein	128	1774	8.5389	7.184	2.3784	1.9776	1.3458	1.2262	1.1017	1.064	1.0398	1.0321	1.025	1.0242	1.023	1.0232	1.0232
gt;MAE49180 hypothetical protein	162	1774	11.5712	10.6682	3.5282	3.0295	1.9056	1.6778	1.3969	1.2994	1.207	1.1645	1.1304	1.1145	1.1011	1.0957	1.094
gt;MAE53630 H+/Ca2+ exchanger	108	1772	2.6023	2.713	0.696	1.4307	0.758	1.2255	0.8754	1.159	0.9661	1.1457	1.0384	1.1603	1.1006	1.1919	1.1558
gt;MAE26420 cell division protein FtsZ	146	1772	7.5376	7.614	2.1289	2.3142	1.4009	1.4201	1.1802	1.1689	1.0869	1.0751	1.0389	1.0266	1.0093	0.9992	0.9897
gt;MAE36410 NADH:flavin oxidoreductase	164	1772	11.725	11.2006	3.9854	3.4263	2.2744	2.0168	1.7157	1.5963	1.4826	1.4206	1.3659	1.3257	1.2938	1.2666	1.2464
gt;MAE36230 sugar transferase	151	1772	12.5989	10.0325	3.4913	2.8333	1.7993	1.5688	1.3103	1.221	1.1409	1.1071	1.0789	1.0682	1.0606	1.0598	1.0592
gt;MAE38740 hypothetical protein	213	1772	17.5229	12.4668	4.3029	3.6377	2.0407	1.9092	1.3831	1.3687	1.1586	1.171	1.0794	1.0921	1.0503	1.0593	1.0367
gt;MAE14750 thiamine biosynthesis protein ThiG	240	1772	20.0054	17.1859	6.141	5.683	3.3107	3.0203	2.2224	2.0416	1.7067	1.5927	1.4305	1.3641	1.2774	1.2401	1.1891
gt;MAE28190 alpha/beta fold family hydrolase	115	1770	4.7077	4.2514	1.2382	1.4862	1.0302	1.1166	1.0024	1.0337	0.9955	1.0096	0.992	1.0003	0.9912	0.9968	0.9891
gt;MAE03050 transposase	107	1770	6.131	5.3056	1.6989	1.5236	1.1312	1.0815	1.0006	0.9746	0.9489	0.9301	0.9115	0.8976	0.8853	0.88	0.878
gt;MAE19090 glycosyl transferase group 1	176	1770	13.9445	11.0059	3.5082	3.1476	1.8031	1.7023	1.3175	1.2625	1.1231	1.0887	1.0267	1.0028	0.9718	0.956	0.9372
gt;MAE61890 biliverdin reductase	137	1768	8.1868	6.3594	1.9854	1.8119	1.2113	1.1734	1.0419	1.0297	0.9889	0.9834	0.9693	0.966	0.9599	0.9564	0.9534
gt;MAE11170 hypothetical protein	84	1766	3.8603	3.1866	1.2216	1.1863	1.0426	1.0411	1.0339	1.0333	1.0332	1.0332	1.0332	1.0332	1.0332	1.0332	1.0332
gt;MAE08000 N-acetylmuramic acid 6-phosphate etherase	121	1766	5.6615	4.8588	1.4143	1.4771	1.0587	1.0781	0.9918	0.9927	0.9677	0.9638	0.9548	0.9507	0.9476	0.9441	0.9414
gt;MAE42080 hypothetical protein	134	1766	7.7858	7.2735	2.0745	2.0417	1.2454	1.2773	1.0755	1.1095	1.0545	1.0843	1.0721	1.0929	1.0957	1.1106	1.1174
gt;MAE24610 2-octaprenyl-6-methoxyphenol hydroxylase	168	1766	12.6578	10.8945	3.4529	2.8067	1.6695	1.4723	1.2034	1.1395	1.0541	1.027	0.9959	0.9845	0.971	0.9651	0.9601
gt;MAE05360 cytosine deaminase	203	1766	21.3371	16.7403	6.6006	5.4342	3.3716	2.8528	2.1967	1.9338	1.6687	1.5286	1.404	1.3252	1.2561	1.2101	1.1704
gt;MAE32090 hypothetical protein	310	1766	39.9647	38.2643	18.5746	16.6093	11.9557	10.5808	8.8227	7.9299	7.048	6.4554	5.9277	5.516	5.1595	4.8591	4.6018
gt;MAE23060 cysteine desulfurase	175	1764	11.7567	11.246	3.3826	3.3717	1.9226	1.8736	1.4492	1.3924	1.2306	1.1898	1.1154	1.0855	1.0475	1.0266	1.0057
gt;MAE61610 flavoprotein	230	1764	19.8852	16.096	5.8048	5.3289	3.0893	2.8504	2.091	1.9366	1.6231	1.5205	1.3672	1.3021	1.2179	1.1734	1.1254
gt;MAE58490 hypothetical protein	183	1764	21.6679	16.8513	7.6751	5.9909	4.1154	3.4139	2.7954	2.4624	2.1894	2.0148	1.8734	1.7666	1.6789	1.6095	1.5514
gt;MAE17440 competence protein ComM homolog	234	1764	23.9382	20.4656	8.3411	7.4877	4.6279	4.1224	3.0616	2.7634	2.2718	2.0898	1.8319	1.713	1.5624	1.483	1.3851
gt;MAE06370 nucleic acid-binding protein	145	1762	10.2818	8.9617	2.8102	2.4072	1.5306	1.3774	1.1903	1.1341	1.0886	1.0709	1.0569	1.0488	1.0449	1.042	1.0412
gt;MAE08870 predicted alpha/beta hydrolase	154	1762	12.5574	8.4793	2.9161	2.3611	1.5056	1.361	1.1479	1.0948	1.0293	1.0089	0.985	0.9711	0.9592	0.9515	0.943
gt;MAE04690 manganese transport system ATP-binding protein	119	1758	6.4216	5.5008	1.6721	1.5417	1.1337	1.1082	1.0467	1.0434	1.0364	1.0414	1.046	1.056	1.0639	1.0757	1.0845
gt;MAE14270 periplasmic protein	143	1758	8.8497	6.7985	2.1355	1.9898	1.2871	1.2595	1.0947	1.092	1.0456	1.0496	1.0356	1.0442	1.0373	1.046	1.0443
gt;MAE39200 transposase	198	1758	18.167	16.4442	6.1172	5.0489	3.088	2.6	1.9992	1.761	1.5241	1.4052	1.302	1.2463	1.1963	1.1671	1.1426
gt;MAE37500 hypothetical protein	160	1756	5.0094	3.6558	0.7625	1.6995	0.5912	1.3775	0.6317	1.2289	0.6792	1.1254	0.7164	1.0398	0.7373	0.9741	0.7438
gt;MAE06000 hypothetical protein	183	1756	13.1693	13.2367	4.2372	3.9322	2.3017	2.0689	1.6108	1.4784	1.3144	1.2519	1.183	1.1482	1.1149	1.0963	1.0811
gt;MAE11590 unknown protein	188	1754	15.2275	12.8247	4.162	3.911	2.2019	2.0674	1.5375	1.4547	1.2487	1.1989	1.1077	1.0777	1.0291	1.0101	0.982
gt;MAE15530 hypothetical protein	276	1754	31.6742	30.8657	14.5708	13.7232	9.7245	8.9473	7.4177	6.8298	6.0665	5.6364	5.1817	4.8627	4.5597	4.3201	4.0975
gt;MAE16040 transposase	173	1752	16.9949	13.342	5.3555	4.2725	2.6687	2.2628	1.7525	1.5779	1.3786	1.2956	1.212	1.1763	1.1384	1.1213	1.1054
gt;MAE15620 hypothetical protein	175	1752	17.7597	13.8464	5.6354	4.4366	2.8845	2.3994	1.9283	1.7046	1.5158	1.3985	1.309	1.2444	1.1918	1.1521	1.1202
gt;MAE16710 biotin carboxylase	197	1752	19.1568	16.196	6.4304	5.4928	3.458	2.9533	2.2792	1.9941	1.7087	1.5457	1.4008	1.3069	1.223	1.1634	1.1156
gt;MAE61820 transketolase	264	1752	28.4089	25.8637	11.2534	10.4821	6.8456	6.3928	4.9773	4.6931	4.0059	3.8046	3.42	3.2728	3.0358	2.9159	2.7534
gt;MAE30650 hypothetical protein	64	1750	1.7016	1.8632	0.9695	1.0451	0.9817	1.0078	0.9758	0.9971	0.9692	0.9843	0.964	0.9691	0.9586	0.9582	0.9552
gt;MAE56780 hypothetical protein	93	1750	3.6987	4.2161	1.3197	1.4722	1.0557	1.0955	0.9962	0.9984	0.9626	0.9529	0.932	0.9223	0.9082	0.8986	0.8878
gt;MAE20020 bicarbonate transport system ATP-binding protein	132	1750	8.4437	6.8087	2.1131	1.888	1.2864	1.2241	1.107	1.0927	1.068	1.0687	1.0663	1.074	1.0806	1.0922	1.1022
gt;MAE29870 hypothetical protein	150	1750	9.388	8.4681	2.6841	2.4979	1.5696	1.4989	1.2506	1.2101	1.1212	1.0992	1.0604	1.0477	1.0259	1.0124	0.9978
gt;MAE43980 hypothetical protein	229	1750	20.6462	16.4713	5.5906	5.1001	2.7726	2.5987	1.8221	1.7286	1.4176	1.3654	1.2242	1.1901	1.1195	1.0974	1.0602
gt;MAE30450 hypothetical protein	141	1748	8.3416	7.1261	2.1136	1.8803	1.2384	1.176	1.0437	1.017	0.9736	0.9543	0.9341	0.9257	0.9164	0.9101	0.9037
gt;MAE22550 molybdopterin binding oxidoreductase	148	1748	10.3808	7.9311	2.5198	2.3537	1.4299	1.3955	1.1389	1.1218	1.03	1.0215	0.9782	0.9726	0.9516	0.9472	0.9357
gt;MAE33730 cytosine-specific modification DNA methylase	198	1748	21.6548	17.6816	7.469	5.7974	3.7976	3.0662	2.4211	2.0841	1.8119	1.641	1.5076	1.4173	1.346	1.2977	1.2573
gt;MAE07800 hypothetical protein	282	1748	30.3823	28.4348	11.9627	10.9879	7.1122	6.384	4.9619	4.4687	3.7989	3.4612	3.0894	2.8567	2.6235	2.4594	2.2978
gt;MAE62800 transposase	204	1746	23.9336	21.6771	9.8996	8.3448	5.7261	4.8979	3.9664	3.4986	3.0574	2.7791	2.5284	2.3455	2.1879	2.0633	1.9552
gt;MAE03860 extracellular solute-binding protein	122	1744	6.9532	6.2247	2.03	1.8023	1.2595	1.1952	1.0911	1.0735	1.0478	1.0429	1.0395	1.0405	1.0403	1.042	1.0442
gt;MAE35500 transposase	164	1744	14.8459	12.543	4.9237	4.1205	2.6122	2.2574	1.7711	1.6026	1.4082	1.3262	1.2389	1.1982	1.1559	1.1376	1.1187
gt;MAE23500 two-component sensor histidine kinase	196	1744	20.709	17.056	7.146	5.4932	3.5591	2.8548	2.2374	1.9133	1.6596	1.5043	1.382	1.3013	1.24	1.1931	1.1609
gt;MAE62450 UDP-glucose 4-epimerase	142	1742	10.8284	7.5263	2.7233	2.2592	1.4907	1.3684	1.1669	1.1188	1.0428	1.0238	0.9887	0.9775	0.9578	0.9456	0.9326
gt;MAE28860 transposase	167	1742	13.0078	12.602	4.7893	4.0211	2.7573	2.3964	2.0372	1.8619	1.7155	1.6193	1.5425	1.4782	1.4244	1.3824	1.3416
gt;MAE45550 transposase	198	1742	23.6776	19.7281	9.5777	7.8272	5.6918	4.8567	4.0995	3.6588	3.2892	3.028	2.8096	2.6388	2.4917	2.3716	2.2665
gt;MAE46260 glutathione reductase	207	1740	19.1497	17.0205	6.4379	5.5038	3.3935	2.8834	2.2213	1.9536	1.6913	1.5483	1.4269	1.3499	1.2872	1.2445	1.2125
gt;MAE25030 NAD(P)-dependent glyceraldehyde-3-phosphate dehydrogenase	146	1738	10.3046	8.0955	2.5571	2.3875	1.469	1.42	1.1735	1.1465	1.0583	1.0422	1.0015	0.9906	0.9719	0.9646	0.9515
gt;MAE44590 transposase	202	1738	20.9693	16.8387	6.6286	5.4299	3.3859	2.8714	2.215	1.9581	1.6896	1.5531	1.4247	1.3458	1.2809	1.2334	1.1979
gt;MAE42860 phospholipid/glycerol acyltransferase	93	1736	3.0494	3.0506	1.073	1.1676	0.9893	0.9975	0.9638	0.9642	0.9514	0.9487	0.9386	0.9341	0.9255	0.9214	0.915
gt;MAE57310 50S ribosomal protein L5	93	1736	5.9382	4.5699	1.6906	1.4543	1.1194	1.0541	0.9835	0.9571	0.932	0.9165	0.9052	0.8992	0.8969	0.8942	0.8919
gt;MAE24600 peptidase, S9C (acylaminoacyl-peptidase) family protein	277	1736	31.0955	30.3882	13.8162	13.4497	9.1379	8.5624	6.8702	6.3657	5.5367	5.1496	4.6709	4.3815	4.0735	3.8494	3.6334
gt;MAE19320 alpha/beta fold family hydrolase	122	1734	7.5591	5.791	1.8705	1.5829	1.1583	1.0902	1.0144	0.9894	0.9682	0.9538	0.9391	0.9284	0.917	0.9053	0.8978
gt;MAE16740 hypothetical protein	81	1732	2.665	2.6557	1.0735	1.1338	1.0219	1.0471	1.0458	1.0666	1.0792	1.0963	1.1102	1.1281	1.141	1.1579	1.1678
gt;MAE60100 GUN4-like protein	240	1732	24.6328	21.702	8.8113	7.5154	4.6781	3.951	2.9611	2.5482	2.1123	1.8772	1.6536	1.515	1.3895	1.3055	1.2322
gt;MAE24870 peptidase C14, caspase catalytic subunit P20	241	1732	27.0079	23.2503	10.0787	8.7771	5.9172	5.1711	4.1756	3.7205	3.2565	2.9688	2.7095	2.5149	2.3481	2.2103	2.0915
gt;MAE53960 ferredoxin-nitrate reductase	313	1732	33.7165	31.8153	13.5144	13.6273	8.5752	8.6207	6.4446	6.4429	5.2983	5.2596	4.5906	4.5232	4.1026	4.0261	3.7471
gt;MAE42270 DNA mismatch repair protein MutL	278	1732	33.7284	31.2885	14.3796	13.5861	9.1955	8.6701	6.8874	6.5037	5.6033	5.3086	4.7875	4.5573	4.2311	4.05	3.8238
gt;MAE31430 threonyl-tRNA synthetase	288	1732	36.0584	33.4682	16.6253	14.4677	10.5008	9.2148	7.6846	6.9142	6.1316	5.6425	5.1713	4.8381	4.5271	4.2848	4.0594
gt;MAE28610 hypothetical protein	58	1730	1.5067	1.6486	0.9706	1.0167	0.978	0.9812	0.9669	0.9666	0.9535	0.9506	0.9438	0.9386	0.9336	0.9287	0.9217
gt;MAE34940 probable nicotinate-nucleotide adenylyltransferase	78	1730	2.543	2.3452	0.9862	1.123	0.9878	1.0273	1.0067	1.0228	1.0242	1.0379	1.0465	1.0592	1.0737	1.0886	1.1048
gt;MAE22420 transposase	115	1730	7.4139	5.8258	1.9112	1.5446	1.1595	1.0756	1.0102	0.9844	0.9609	0.9481	0.9348	0.9296	0.9251	0.9231	0.9221
gt;MAE13560 penicillin-binding protein	251	1730	24.7454	22.5654	9.0948	8.15	5.0554	4.4431	3.3038	2.9346	2.4075	2.1767	1.8993	1.7563	1.5959	1.4994	1.4026
gt;MAE44490 heat shock protein DnaJ-like	301	1730	32.7631	30.4606	13.4764	12.6874	8.5742	7.9093	6.3549	5.8632	5.1108	4.7583	4.3357	4.0753	3.8062	3.6151	3.429
gt;MAE55520 transposase	194	1728	20.1588	16.8557	6.8168	5.3182	3.3474	2.6813	2.0716	1.7687	1.5286	1.389	1.2834	1.2155	1.1655	1.1298	1.1056
gt;MAE19770 hypothetical protein	112	1726	6.7312	4.9469	1.7594	1.4978	1.1402	1.0923	1.0311	1.0229	1.0076	1.0055	1.0021	1.0013	0.9996	0.9986	0.9977
gt;MAE12050 hypothetical protein	220	1726	22.6383	18.2562	7.1362	6.0586	3.7209	3.2081	2.4372	2.1556	1.836	1.6787	1.5203	1.4262	1.3404	1.2794	1.2289
gt;MAE23670 hypothetical protein	292	1726	32.0757	30.8701	14.2131	13.9436	9.0865	8.9585	6.6962	6.618	5.3391	5.2789	4.484	4.4254	3.8925	3.8285	3.4545
gt;MAE41860 glutamate decarboxylase	80	1724	2.4605	2.6221	1.0256	1.1412	1.0125	1.0505	1.0441	1.0616	1.0706	1.0879	1.1028	1.1168	1.1299	1.1425	1.1494
gt;MAE17700 hypothetical protein	183	1724	13.5364	10.9791	3.7371	3.4879	2.0112	1.9864	1.4756	1.4748	1.2511	1.2556	1.1421	1.1456	1.0848	1.0884	1.0522
gt;MAE10550 hypothetical protein	203	1724	23.8403	20.315	9.4889	7.7324	5.4235	4.5579	3.7361	3.2775	2.8867	2.6191	2.3977	2.2303	2.0914	1.98	1.8867
gt;MAE28830 transposase	187	1722	16.2478	13.6914	4.9862	4.3191	2.5891	2.2764	1.7422	1.5764	1.3718	1.2818	1.1895	1.1317	1.0815	1.0445	1.0136
gt;MAE02160 probable glycosyl transferase	238	1722	23.0185	19.0549	7.4152	6.5777	4.008	3.5349	2.6431	2.3498	1.9578	1.7784	1.58	1.4623	1.355	1.28	1.2186
gt;MAE28140 probable o-sialoglycoprotein endopeptidase	139	1720	7.9892	6.5257	1.89	1.9559	1.1761	1.2522	1.0337	1.071	0.9913	1.0097	0.9756	0.9821	0.9641	0.9681	0.9594
gt;MAE15830 pentapeptide repeat family protein	175	1720	19.7379	15.8031	6.5386	5.1519	3.3736	2.7651	2.2	1.9044	1.6614	1.5034	1.3789	1.289	1.2202	1.1651	1.119
gt;MAE21080 transposase	195	1720	20.3495	16.9884	6.8557	5.3625	3.3616	2.7019	2.0799	1.7806	1.5358	1.3954	1.2908	1.2238	1.175	1.1403	1.1175
gt;MAE54570 phosphorybosilformimino-5-amino-phosphorybosil-4-imidazolecarboxamideisomerase	107	1718	4.9581	4.4658	1.4584	1.3886	1.0831	1.0638	1.0181	1.0172	1.0076	1.01	1.01	1.0131	1.0157	1.0202	1.0239
gt;MAE09030 hypothetical protein	125	1718	6.2597	5.7042	1.6586	1.667	1.1451	1.1511	1.041	1.0478	1.0192	1.0257	1.0195	1.0245	1.0254	1.03	1.0327
gt;MAE59400 hypothetical protein	105	1716	5.6534	5.0412	1.5436	1.4427	1.076	1.0531	0.9965	0.9911	0.9803	0.9776	0.975	0.9736	0.972	0.9709	0.9706
gt;MAE26160 hypothetical protein	136	1716	8.6417	7.7758	2.2218	2.2871	1.318	1.3603	1.0971	1.1163	1.0329	1.0453	1.0128	1.0187	1.0049	1.0085	1
gt;MAE31690 ferrous iron transport protein B	283	1716	21.2288	18.0167	6.5652	7.3564	3.8298	4.5272	2.7885	3.2807	2.2417	2.5873	1.8971	2.1423	1.6633	1.8308	1.4752
gt;MAE54650 alpha-amylase family protein	311	1716	38.3708	36.6881	17.0898	16.5564	11.2588	10.7571	8.5542	8.1345	6.9969	6.6533	5.9829	5.7021	5.2635	5.0321	4.722
gt;MAE60810 probable hydrolase	116	1714	5.5675	5.5552	1.7112	1.6929	1.191	1.1605	1.0638	1.0511	1.0315	1.0301	1.0239	1.0278	1.0288	1.0325	1.0367
gt;MAE18550 nicotinate-nucleotide pyrophosphorylase	124	1714	7.518	5.44	1.696	1.6415	1.0838	1.1373	0.9865	1.0104	0.9545	0.9624	0.9365	0.9374	0.9205	0.9152	0.9035
gt;MAE39900 transposase	119	1714	8.3815	6.5152	2.2965	1.9112	1.3739	1.2687	1.1582	1.1265	1.1	1.0921	1.0856	1.0878	1.0904	1.0961	1.1034
gt;MAE16590 glucose-6-phosphate isomerase	242	1714	25.9358	21.9525	9.7409	8.7947	5.8824	5.4128	4.2989	4.003	3.4572	3.2507	2.9358	2.78	2.5758	2.4542	2.3136
gt;MAE23260 transposase	76	1712	3.0016	2.4086	1.0628	1.159	1.0163	1.0775	1.0517	1.0865	1.0797	1.1056	1.1032	1.1137	1.1148	1.1196	1.1215
gt;MAE22140 hypothetical protein	78	1710	3.0483	2.9742	1.1567	1.198	1.0261	1.0404	1.0198	1.0336	1.0352	1.0469	1.0527	1.0629	1.0687	1.0752	1.0804
gt;MAE13440 ABC-transporter ATP-binding protein	223	1710	15.2232	11.6551	3.7791	3.9552	2.0702	2.2199	1.4823	1.5956	1.2437	1.3246	1.1419	1.2048	1.1002	1.1429	1.0879
gt;MAE44500 transposase	183	1710	17.1202	16.6699	6.1644	5.3007	3.2714	2.7845	2.1607	1.9034	1.6533	1.5071	1.3827	1.3008	1.2329	1.1852	1.1472
gt;MAE44180 proline-tRNA ligase	262	1710	27.0371	24.1581	10.7822	10.3346	6.8083	6.6359	5.1306	5.0256	4.2399	4.1462	3.6856	3.5913	3.293	3.2032	2.9995
gt;MAE48930 bifunctional deaminase-reductase-like	92	1708	3.4472	3.1949	1.1272	1.1816	0.9972	1.0085	0.9777	0.976	0.9619	0.9556	0.9455	0.9367	0.9248	0.9113	0.899
gt;MAE31900 arginyl-tRNA-synthetase	265	1708	33.1173	30.3276	14.303	12.9942	9.0178	8.2728	6.7393	6.2578	5.5169	5.1815	4.7619	4.5145	4.2481	4.0616	3.8772
gt;MAE26690 hypothetical protein	59	1706	1.8663	1.8504	1.0085	1.034	0.9972	1.0096	1.0051	1.0114	1.0114	1.0154	1.0175	1.0188	1.0199	1.0215	1.0224
gt;MAE01660 transposase	149	1704	11.1649	9.305	3.1737	2.737	1.7499	1.5647	1.3169	1.2372	1.16	1.1266	1.1002	1.0857	1.0731	1.0672	1.0618
gt;MAE31950 hypothetical protein	183	1704	18.6043	13.4512	5.1395	3.7877	2.3817	1.913	1.5381	1.3559	1.2268	1.1503	1.0965	1.0574	1.0295	1.0098	0.9923
gt;MAE00540 hypothetical protein	86	1702	3.5739	3.239	1.1815	1.2206	1.0254	1.0559	1.0297	1.0448	1.0365	1.0449	1.041	1.0466	1.0442	1.0471	1.045
gt;MAE08340 hypothetical protein	147	1702	9.5874	8.3166	2.4111	2.4069	1.3396	1.4265	1.0968	1.1606	1.0368	1.066	1.012	1.0333	1.0058	1.0181	1.0047
gt;MAE40360 transposase	217	1702	26.8648	23.6582	10.8461	8.9	6.0754	5.0757	4.0488	3.5026	3.011	2.6904	2.4127	2.2086	2.0342	1.8943	1.7762
gt;MAE59820 potassium-transporting P-type ATPase B chain	277	1702	27.01	24.8008	10.3605	10.3363	6.6165	6.5451	4.9892	4.923	4.0977	4.0446	3.5375	3.4864	3.1564	3.107	2.8748
gt;MAE62650 1-deoxyxylulose-5-phosphate synthase	297	1702	36.2198	34.8111	16.1314	15.2604	10.5837	9.8071	8.0063	7.4155	6.5282	6.0878	5.5714	5.2444	4.9021	4.6503	4.4022
gt;MAE44360 phosphoribosyl formylglycinamidine cyclo-ligase	147	1700	10.1163	8.5954	2.6163	2.4073	1.4904	1.4111	1.1922	1.153	1.0869	1.0687	1.0479	1.0425	1.0335	1.031	1.0276
gt;MAE20300 putative transposase	167	1700	14.9754	12.178	4.5537	3.4047	2.1829	1.7668	1.4524	1.2999	1.1974	1.1403	1.1021	1.0801	1.0648	1.057	1.0525
gt;MAE33920 hypothetical protein	77	1698	2.9536	2.7165	1.1235	1.0985	0.9954	0.9827	0.9639	0.9511	0.9414	0.933	0.9253	0.9193	0.9122	0.9065	0.9003
gt;MAE06300 carboxysome formation protein CcmA	158	1698	12.6108	8.7993	3.0586	2.482	1.5746	1.4077	1.1835	1.1232	1.0515	1.0274	1.0001	0.9901	0.9765	0.972	0.9628
gt;MAE27130 transposase	277	1698	35.8926	33.8781	16.3937	14.6368	10.5395	9.3478	7.7945	7.0237	6.2433	5.7325	5.2612	4.9087	4.5875	4.329	4.1002
gt;MAE49600 transposase	274	1696	35.0245	33.544	16.2467	14.7087	10.6245	9.505	7.9468	7.1971	6.4031	5.889	5.408	5.0473	4.7233	4.456	4.2215
gt;MAE21700 hypothetical protein	88	1694	3.2241	2.6267	0.9688	1.1829	0.9221	1.0216	0.9342	0.9746	0.9325	0.951	0.9284	0.9353	0.926	0.9267	0.925
gt;MAE47100 arginase	120	1694	6.0444	5.7709	1.6099	1.6362	1.1084	1.1151	1.0036	0.9952	0.959	0.946	0.9287	0.919	0.9096	0.9019	0.8945
gt;MAE31770 hypothetical protein	143	1694	8.4579	6.0313	1.845	1.8497	1.1437	1.2218	1.0157	1.0632	0.9881	1.0122	0.9778	0.992	0.9703	0.98	0.966
gt;MAE37520 peptidase M42	140	1694	11.3529	9.6165	3.4541	2.9659	1.9232	1.7307	1.446	1.3592	1.2588	1.2168	1.1758	1.1577	1.1406	1.1323	1.1299
gt;MAE63120 haloacid dehalogenase-like hydrolase	110	1692	6.8554	5.0914	1.713	1.4437	1.1274	1.0843	1.0485	1.0526	1.0505	1.0634	1.0661	1.076	1.0787	1.0819	1.0838
gt;MAE06805 hypothetical protein	113	1692	6.9916	5.4918	1.8348	1.5432	1.1478	1.0838	1.014	1.0004	0.9825	0.9784	0.9767	0.9764	0.9757	0.9753	0.9753
gt;MAE12470 ribosomal protein S6 modification protein	133	1692	7.6374	7.3159	2.1201	2.0114	1.2872	1.2551	1.101	1.1025	1.0686	1.0796	1.0771	1.0866	1.0906	1.0967	1.1011
gt;MAE09580 hypothetical protein	147	1692	8.4327	8.5176	2.3239	2.4071	1.3985	1.3897	1.1349	1.1153	1.0302	1.0141	0.9777	0.9608	0.9411	0.9244	0.9114
gt;MAE45040 soluble hydrogenase 42 kDa subunit	158	1692	8.5151	7.1875	2.0103	2.1832	1.2524	1.3335	1.0644	1.1027	1.0105	1.0332	0.9967	1.0086	0.9918	1.0031	0.99
gt;MAE34910 aminomethyltransferase	145	1692	13.8033	9.5674	3.7084	2.6249	1.7732	1.4672	1.2659	1.1705	1.1117	1.0793	1.0636	1.0535	1.0484	1.0472	1.0448
gt;MAE40970 two-component response regulator	99	1690	5.0748	3.643	1.2748	1.2814	1.0138	1.0564	1.0026	1.0252	1.0142	1.0237	1.0248	1.0336	1.0395	1.0489	1.057
gt;MAE47040 rieske 2Fe-2S family protein	168	1690	12.6917	9.874	3.316	2.8107	1.6628	1.5208	1.1976	1.1498	1.0334	1.0154	0.9674	0.9601	0.9374	0.9333	0.9187
gt;MAE18840 agmatinase	183	1690	18.7133	13.7174	5.3847	4.1213	2.6306	2.1472	1.7126	1.5023	1.3377	1.2395	1.1676	1.1177	1.0819	1.0574	1.0343
gt;MAE16510 transposase	189	1690	20.4547	18.0804	7.5521	6.1642	3.9807	3.3025	2.5682	2.2286	1.9063	1.7223	1.5589	1.4515	1.3595	1.2916	1.2318
gt;MAE25590 hypothetical protein	138	1688	8.7318	7.6642	2.2241	2.0003	1.2883	1.2231	1.0963	1.0833	1.0637	1.0671	1.065	1.0694	1.0707	1.073	1.073
gt;MAE13210 putative glycosyl transferase	150	1688	10.4535	8.5903	2.7093	2.3829	1.4244	1.3615	1.1096	1.0963	1.0132	1.0053	0.9705	0.9651	0.9511	0.9487	0.9426
gt;MAE14830 cysteine desulfurase	160	1688	10.6583	9.8026	3.0563	2.9577	1.746	1.6795	1.3343	1.2774	1.1484	1.1097	1.0513	1.0253	0.9957	0.9771	0.9569
gt;MAE48460 unknown protein	169	1688	13.6369	13.0088	4.3367	4.0546	2.2916	2.1332	1.5917	1.5105	1.3159	1.2769	1.1988	1.1802	1.1481	1.1421	1.1296
gt;MAE07330 exodeoxyribonuclease III	150	1688	13.9024	10.6675	4.0114	2.9518	1.9142	1.5699	1.3049	1.1766	1.0826	1.0284	0.99	0.9618	0.9406	0.9206	0.9078
gt;MAE36780 hypothetical protein	221	1688	22.9276	19.5036	7.7219	6.6268	4.0383	3.5476	2.6455	2.3844	1.9882	1.8308	1.63	1.5331	1.4247	1.3632	1.2979
gt;MAE62050 probable reverse transcriptase	287	1688	38.1305	37.21	18.6055	16.7008	11.9988	10.7485	8.8342	8.0467	7.0526	6.5259	5.9246	5.5503	5.1536	4.8742	4.5869
gt;MAE55890 unknown protein	161	1686	8.4185	6.0901	1.8175	2.2482	1.0959	1.4502	0.9862	1.2088	0.9971	1.121	1.0222	1.0907	1.0434	1.0816	1.0604
gt;MAE26620 unknown protein	134	1686	11.24	7.7253	2.924	2.3265	1.5912	1.4209	1.2321	1.1709	1.1122	1.0886	1.0666	1.0578	1.0491	1.0451	1.0393
gt;MAE41020 possible sensor with CHASE2 domain	273	1686	27.0496	22.4562	9.4699	8.8221	5.2309	5.2085	3.5938	3.6831	2.7911	2.8758	2.3324	2.3932	2.0484	2.0809	1.8446
gt;MAE23310 iron(III) ABC-transporter permease protein	153	1684	5.9144	4.5658	1.1266	1.7823	0.8248	1.2981	0.8283	1.1247	0.8428	1.0283	0.8438	0.9643	0.8438	0.9193	0.835
gt;MAE04710 hypothetical protein	196	1684	18.5158	15.1924	5.7556	4.8598	2.9003	2.5121	1.8786	1.6874	1.4381	1.3316	1.2153	1.15	1.0888	1.0465	1.0096
gt;MAE16600 possible ABC-transporter	144	1682	8.4183	7.0158	2.1824	2.1636	1.3157	1.3424	1.1005	1.1241	1.033	1.0507	1.0092	1.0257	0.9995	1.0151	0.995
gt;MAE16070 double-stranded DNA binding protein RecA	140	1682	9.2572	8.2478	2.6276	2.332	1.4593	1.3712	1.15	1.1108	1.0405	1.0193	0.9872	0.9717	0.9565	0.9454	0.9342
gt;MAE42490 polysaccharide export ABC-transporter ATP-binding subunit	124	1682	10.2057	6.7528	2.4416	1.7995	1.3069	1.176	1.0963	1.0723	1.0598	1.0574	1.056	1.0555	1.0555	1.0556	1.0557
gt;MAE18630 hypothetical protein	172	1682	13.8454	12.7485	4.0459	3.5704	2.0356	1.8502	1.4147	1.3328	1.1791	1.1375	1.0728	1.0515	1.0261	1.0172	1.0088
gt;MAE48340 phycobilisome rod-core linker polypeptide	105	1680	5.2501	4.4971	1.4237	1.3749	1.0665	1.0674	1.0234	1.0327	1.0288	1.0392	1.044	1.0559	1.0645	1.0778	1.0884
gt;MAE12070 hypothetical protein	157	1680	11.8851	9.2954	3.1298	2.8015	1.7291	1.6021	1.3109	1.2472	1.1415	1.1073	1.0652	1.0454	1.026	1.0147	1.0052
gt;MAE56450 NADH dehydrogenase subunit H	101	1678	1.6123	2.0811	0.5638	1.4176	0.7087	1.2346	0.8137	1.1094	0.839	1.0114	0.8233	0.9309	0.7905	0.8611	0.7544
gt;MAE39080 rod shape-determining protein MreC	99	1678	4.2603	3.7379	1.1934	1.3503	0.9997	1.0436	0.9578	0.9674	0.9326	0.9328	0.9156	0.9116	0.9011	0.8963	0.8898
gt;MAE58450 transposase	99	1678	6.2177	3.8206	1.4292	1.3201	1.0607	1.0711	1.03	1.0489	1.0471	1.0596	1.0681	1.0786	1.0894	1.1045	1.1179
gt;MAE57000 hypothetical protein	148	1678	11.0166	10.012	3.1123	2.7162	1.6203	1.4753	1.2113	1.1494	1.0652	1.0291	0.9934	0.9743	0.9591	0.9491	0.9416
gt;MAE54620 transposase	210	1678	26.7108	23.8713	11.3918	9.6414	6.831	5.9222	4.8972	4.3895	3.8973	3.5889	3.3058	3.1019	2.9188	2.7754	2.6483
gt;MAE53640 hypothetical protein	88	1676	2.8858	2.9063	1.0502	1.1709	0.9785	1.0032	0.9588	0.9557	0.9327	0.9233	0.9027	0.8941	0.8836	0.8781	0.8714
gt;MAE01140 hypothetical protein	169	1676	9.5199	6.6638	2.0737	2.365	1.1568	1.5318	0.9836	1.2626	0.9774	1.1648	1.0061	1.137	1.0426	1.1324	1.078
gt;MAE09700 ketol-acid reductoisomerase	149	1676	12.5117	8.9472	3.1715	2.721	1.6637	1.555	1.2442	1.2071	1.0875	1.0719	1.0161	1.0109	0.9821	0.9797	0.9648
gt;MAE11230 hypothetical protein	177	1676	16.6558	14.9098	5.5644	4.5005	2.8	2.3074	1.8122	1.5809	1.3926	1.2757	1.1881	1.1307	1.0883	1.0599	1.0388
gt;MAE07020 hypothetical protein	252	1676	25.8202	22.1576	8.7889	8.0427	4.9492	4.5801	3.4424	3.2283	2.7023	2.5604	2.2755	2.1756	2.0097	1.9292	1.8238
gt;MAE08320 transposase	274	1676	35.073	32.9122	15.9384	14.2153	10.2261	9.0904	7.5732	6.8402	6.073	5.5809	5.1215	4.7761	4.4647	4.2137	3.9915
gt;MAE49810 transcriptional regulator	87	1674	3.3046	2.8847	1.0739	1.1501	0.9766	0.9877	0.9461	0.9403	0.9212	0.9126	0.9001	0.8929	0.8855	0.8787	0.8715
gt;MAE16240 hypothetical protein	119	1674	6.266	6.1074	2.0013	1.9999	1.378	1.3536	1.1978	1.1799	1.1287	1.1235	1.1008	1.1032	1.0936	1.0969	1.0961
gt;MAE17940 transposase	126	1674	11.015	8.1302	3.1523	2.4383	1.6654	1.4341	1.2356	1.1506	1.0864	1.0543	1.03	1.0153	1.0053	0.998	0.9926
gt;MAE40640 3-beta hydroxysteroid dehydrogenase/isomerase	128	1674	11.3526	7.9039	3.0833	2.3354	1.5919	1.3782	1.1997	1.1336	1.0792	1.0565	1.0368	1.0273	1.0207	1.016	1.013
gt;MAE30860 CRISPR-associated protein Cas1	157	1674	11.7296	10.1878	3.3389	3.0152	1.793	1.6807	1.333	1.2936	1.177	1.161	1.1201	1.1171	1.1051	1.1107	1.1106
gt;MAE51150 transposase	142	1674	14.2397	10.8366	4.3665	3.2971	2.1598	1.7852	1.4519	1.295	1.1719	1.1014	1.0487	1.0159	0.9933	0.9772	0.9678
gt;MAE47850 unknown protein	246	1674	32.1812	29.7957	14.4057	12.3912	8.8229	7.6292	6.2955	5.5847	4.9266	4.4816	4.0978	3.8003	3.5456	3.3395	3.1615
gt;MAE25690 precorrin-4 C11-methyltransferase	103	1672	3.4211	2.9989	0.8834	1.3155	0.8757	1.1174	0.9276	1.0599	0.9632	1.037	0.9798	1.0305	0.9914	1.0237	0.9983
gt;MAE56930 elongation factor P	91	1672	5.7611	3.8105	1.5234	1.2996	1.0963	1.0607	1.0365	1.028	1.0228	1.021	1.0202	1.0198	1.0194	1.0194	1.0194
gt;MAE41730 hypothetical protein	154	1672	12.6073	10.8274	3.7233	3.1232	1.9371	1.6869	1.3811	1.2742	1.1776	1.1355	1.0994	1.0808	1.0679	1.0602	1.0556
gt;MAE01700 transposase	198	1672	22.8939	18.9928	8.9082	7.218	5.1436	4.3468	3.6237	3.2033	2.8596	2.6157	2.4147	2.2597	2.1296	2.0219	1.9348
gt;MAE52520 tRNA pseudouridine synthase 1	122	1670	8.8251	6.3428	2.0932	1.7316	1.2376	1.1657	1.085	1.0736	1.061	1.0653	1.0663	1.0705	1.0754	1.0793	1.0822
gt;MAE38030 hypothetical protein	148	1670	10.8361	8.5295	2.8293	2.656	1.6566	1.5877	1.3093	1.2625	1.1639	1.135	1.0935	1.0769	1.0594	1.0498	1.04
gt;MAE24090 hypothetical protein	163	1670	14.424	11.0593	4.2085	3.4728	2.2149	1.9394	1.5633	1.4429	1.299	1.2458	1.1852	1.163	1.1385	1.1297	1.1235
gt;MAE01220 probable glycosyl transferase	248	1670	26.9031	25.2381	10.9508	10.1488	6.7044	6.1334	4.8585	4.4653	3.8692	3.5944	3.2612	3.0624	2.8566	2.7078	2.5651
gt;MAE40910 periplasmic protein	80	1668	3.7968	2.9192	1.2068	1.1502	1.0281	1.0321	1.0272	1.0418	1.0505	1.0679	1.0847	1.1067	1.1244	1.1425	1.1532
gt;MAE39070 rod shape-determining protein MreB	148	1666	11.0072	7.5209	2.6553	2.319	1.4653	1.3935	1.1698	1.1449	1.071	1.0626	1.0357	1.0324	1.0198	1.0202	1.0126
gt;MAE47860 unknown protein	155	1666	11.3463	9.8777	3.1384	2.7885	1.6353	1.5363	1.2335	1.1994	1.1064	1.1002	1.0693	1.0709	1.0635	1.0692	1.0717
gt;MAE42070 precorrin methylase	194	1666	17.1808	14.2409	5.2608	4.5968	2.8333	2.4815	1.926	1.7242	1.4959	1.3788	1.2712	1.1993	1.1381	1.0962	1.0559
gt;MAE45410 TPR repeat precursor	187	1666	19.7967	15.1831	6.0896	4.7594	2.9605	2.4376	1.8876	1.6553	1.4454	1.3335	1.2398	1.1868	1.1421	1.1144	1.0916
gt;MAE42450 transposase	206	1666	24.1837	22.1655	9.9326	8.2204	5.5216	4.5901	3.6382	3.1307	2.689	2.3973	2.1559	1.9751	1.8281	1.7114	1.6132
gt;MAE27970 phycocyanin alpha-subunit phycocyanobilin lyase	101	1664	4.2128	3.7169	1.2156	1.327	1.014	1.0566	0.988	1.0048	0.9845	0.9902	0.9821	0.9853	0.9798	0.9818	0.9774
gt;MAE57010 transposase	120	1664	7.0067	7.0548	2.1152	1.9345	1.283	1.2127	1.0882	1.0613	1.0347	1.0279	1.0217	1.0191	1.0175	1.0173	1.0167
gt;MAE55470 transposase	194	1664	22.3817	20.0012	9.2898	7.9077	5.5622	4.7985	3.9687	3.5339	3.1389	2.8761	2.6517	2.4792	2.335	2.2137	2.1116
gt;MAE46300 hypothetical protein	88	1662	3.7125	3.4164	1.1932	1.2328	1.0347	1.0643	1.0476	1.0641	1.0682	1.0752	1.078	1.0831	1.0848	1.0871	1.0879
gt;MAE21650 glutamate 5-kinase	144	1662	9.9663	7.4064	2.4962	2.1085	1.3998	1.2844	1.123	1.0861	1.0433	1.0313	1.0184	1.0137	1.0107	1.0083	1.0072
gt;MAE22270 transposase	123	1662	10.562	7.5172	2.8211	2.1533	1.5077	1.3184	1.1752	1.1148	1.0736	1.0522	1.0387	1.0309	1.0254	1.0213	1.0191
gt;MAE34750 hypothetical protein	187	1662	20.8783	18.0714	8.1734	7.1218	4.9123	4.3682	3.5913	3.2812	2.9328	2.7429	2.5514	2.4235	2.3027	2.2109	2.1238
gt;MAE05850 putative group II intron/maturase	287	1662	38.0734	37.2696	18.5701	16.7021	11.9773	10.729	8.8076	8.0185	7.018	6.4923	5.8899	5.517	5.1216	4.8481	4.5646
gt;MAE28590 hypothetical protein	60	1660	1.912	1.9307	1.0214	1.0495	1.011	1.0194	1.0213	1.0231	1.0237	1.0246	1.026	1.0269	1.0276	1.0289	1.0296
gt;MAE31570 ribonuclease III	87	1660	3.2034	2.9904	1.128	1.1645	1.0058	1.0063	0.9795	0.971	0.9588	0.949	0.9397	0.9277	0.9179	0.9046	0.8942
gt;MAE04520 isopentenyl monophosphate kinase	112	1660	4.3988	4.3686	1.231	1.4558	0.9968	1.0967	0.9773	1.0287	0.9806	1.011	0.9815	1.006	0.9812	1.0027	0.9807
gt;MAE01420 transposase	190	1660	18.8194	15.3321	5.8725	4.8267	2.8978	2.4896	1.8631	1.6904	1.4368	1.3601	1.2488	1.213	1.1642	1.1472	1.1263
gt;MAE17590 phosphoenolpyruvate synthase	292	1660	29.3015	27.0696	11.6369	11.5704	7.2167	7.2553	5.2938	5.3532	4.2476	4.2998	3.5967	3.6341	3.1499	3.1649	2.8201
gt;MAE59080 transposase	81	1658	4.1006	3.119	1.2924	1.2002	1.0501	1.0355	1.0157	1.0161	1.0138	1.0165	1.0182	1.0224	1.0261	1.0293	1.0328
gt;MAE15210 ribonuclease HII	94	1658	4.2161	3.5722	1.2348	1.253	1.0356	1.0692	1.0471	1.0711	1.0772	1.0933	1.1038	1.1169	1.1215	1.1267	1.1286
gt;MAE57430 50S ribosomal protein L3	92	1658	5.3868	4.389	1.702	1.4305	1.1666	1.098	1.0595	1.042	1.0331	1.0282	1.0258	1.0245	1.0237	1.0233	1.0231
gt;MAE03800 hypothetical protein	150	1658	11.6576	9.0107	3.0333	2.5055	1.5759	1.3938	1.1692	1.0995	1.0278	0.9966	0.9662	0.9494	0.9346	0.9255	0.9179
gt;MAE14440 hypothetical protein	154	1658	13.5828	9.6325	3.5762	2.7511	1.7805	1.5141	1.2606	1.1597	1.0741	1.0273	0.9926	0.9714	0.9526	0.9407	0.9281
gt;MAE55370 uroporphyrinogen-III C-methyltransferase and uroporphyrinogen-III synthase fusion protein	210	1658	17.1352	14.1267	5.1687	4.5922	2.7303	2.474	1.855	1.7113	1.4632	1.3882	1.2717	1.2281	1.1678	1.1461	1.1128
gt;MAE40170 transposase	198	1658	21.2928	17.0781	7.0787	5.4603	3.4801	2.8001	2.176	1.8656	1.6211	1.4742	1.3617	1.2873	1.236	1.2016	1.1754
gt;MAE00250 hypothetical protein	241	1658	25.0054	22.0993	9.1151	8.7596	5.4882	5.3515	4.0772	3.9785	3.3641	3.2715	2.9345	2.8498	2.6461	2.5681	2.4301
gt;MAE11720 hypothetical protein	104	1656	5.1082	3.9485	1.2758	1.3822	0.9818	1.0631	0.9526	0.9792	0.9328	0.9369	0.9072	0.9003	0.879	0.8693	0.8529
gt;MAE55310 transposase	127	1656	11.6244	9.0588	3.3624	2.5862	1.7132	1.4661	1.2606	1.1812	1.1235	1.0944	1.0742	1.0624	1.0517	1.0469	1.0422
gt;MAE00700 putative peptidase PatG homolog	193	1656	18.8758	15.9875	6.1735	4.9974	3.1083	2.5844	2.0068	1.7553	1.5263	1.3954	1.2881	1.2178	1.1614	1.1184	1.0837
gt;MAE18930 hypothetical protein	66	1654	2.113	1.937	0.9938	1.0632	0.9913	1.0125	1.0028	1.0102	1.011	1.0172	1.0214	1.0277	1.0363	1.0466	1.0584
gt;MAE33900 3-oxoacyl-[acyl-carrier protein] reductase	101	1654	4.2242	3.9031	1.2649	1.3242	1.0347	1.0423	0.9857	0.976	0.9571	0.9471	0.9317	0.9216	0.9113	0.8998	0.8904
gt;MAE19640 muconate cycloisomerase	153	1654	11.6991	10.1231	3.3905	2.989	1.8243	1.6563	1.3465	1.2718	1.1713	1.1457	1.1135	1.1082	1.1011	1.1032	1.1055
gt;MAE55860 hypothetical protein	209	1654	22.8478	20.7439	9.2321	8.1284	5.6059	4.9349	4.0585	3.6513	3.2416	2.9849	2.7527	2.5815	2.4345	2.3132	2.2075
gt;MAE09780 hypothetical protein	156	1652	8.9347	8.5394	2.2636	2.4017	1.3179	1.386	1.0884	1.1077	1.0088	1.0133	0.9729	0.9719	0.9515	0.9498	0.9407
gt;MAE52350 rRNA SAM-dependent methyltransferase	223	1652	23.9683	20.1911	8.1921	6.9975	4.392	3.7798	2.8884	2.544	2.1562	1.9553	1.7576	1.6349	1.5251	1.4479	1.3785
gt;MAE46080 60 kDa chaperonin	244	1652	25.8603	20.8818	8.5052	7.0903	4.408	3.7192	2.8016	2.4294	2.0326	1.8165	1.6175	1.4897	1.3814	1.3068	1.2411
gt;MAE09560 hypothetical protein	322	1652	31.2193	29.6864	12.2059	12.4054	7.6727	7.5992	5.6395	5.4934	4.4909	4.3414	3.7612	3.6254	3.2548	3.1402	2.8921
gt;MAE01970 salicylate biosynthesis isochorismate synthase	87	1648	4.783	3.4976	1.4102	1.4233	1.0877	1.1208	1.0351	1.0528	1.0338	1.0533	1.0534	1.0694	1.076	1.091	1.0965
gt;MAE41830 probable glycosyl transferase	139	1648	9.5754	8.4038	2.6403	2.5493	1.5554	1.4987	1.2404	1.2123	1.1341	1.1295	1.1084	1.1126	1.1103	1.1188	1.1243
gt;MAE37630 gas vesicle protein GvpN	145	1648	10.2284	9.5809	3.1807	2.7393	1.7441	1.5524	1.3119	1.2284	1.1568	1.1275	1.1067	1.0974	1.0938	1.0956	1.1014
gt;MAE05010 type I restriction-modification system DNA methylase	181	1648	16.5762	14.2578	5.135	4.0848	2.48	2.0367	1.5984	1.4033	1.2528	1.1649	1.1023	1.0653	1.0397	1.0226	1.0094
gt;MAE03240 hypothetical protein	224	1648	18.0351	16.0134	5.2367	5.4106	2.8893	3.038	2.0688	2.1458	1.6815	1.7131	1.4646	1.4732	1.3276	1.3237	1.2309
gt;MAE02090 argininosuccinate synthetase	175	1648	18.2273	14.0271	5.8488	5.0036	3.1061	2.8196	2.1255	1.9914	1.6786	1.5962	1.4293	1.3682	1.2672	1.2206	1.1561
gt;MAE27860 short-chain dehydrogenase/reductase	227	1648	23.2142	22.7388	9.3282	8.1368	5.1972	4.4093	3.3864	2.9273	2.4623	2.1906	1.9474	1.7789	1.6344	1.524	1.433
gt;MAE52680 NADH dehydrogenase I subunit N	70	1646	2.0455	2.1282	0.9948	1.0732	1.0113	1.0271	1.0241	1.0258	1.026	1.0261	1.0261	1.0261	1.0261	1.0261	1.0261
gt;MAE13020 hypothetical protein	77	1646	2.8534	2.7663	1.0791	1.1184	0.9828	0.9848	0.9683	0.9657	0.9593	0.9546	0.9491	0.9426	0.9374	0.9352	0.9345
gt;MAE15120 NADH dehydrogenase subunit 5 NdhF	169	1644	5.8262	4.83	0.9958	1.9887	0.7835	1.4331	0.8201	1.2169	0.8516	1.1112	0.8814	1.0555	0.906	1.0215	0.9223
gt;MAE49400 unknown protein	131	1644	7.5483	5.9746	1.8389	1.678	1.1779	1.1203	1.0241	0.9989	0.9696	0.958	0.947	0.9405	0.9363	0.9335	0.9324
gt;MAE00190 dTDP-6-deoxy-L-mannose-dehydrogenase	124	1644	8.6204	6.5401	2.0912	1.7727	1.2225	1.1643	1.0715	1.0655	1.0557	1.0622	1.0662	1.0791	1.0881	1.1013	1.1133
gt;MAE07730 hypothetical protein	293	1644	35.3805	34.968	16.2006	15.75	10.9361	10.321	8.4232	7.886	6.934	6.5097	5.9514	5.6193	5.2469	4.9854	4.718
gt;MAE25390 hypothetical protein	127	1642	6.5331	5.0768	1.4637	1.6518	1.031	1.1687	0.981	1.0523	0.9805	1.0167	0.9832	1.0045	0.9851	1.0009	0.9848
gt;MAE21200 probable short-chain dehydrogenase	130	1642	8.9104	6.2966	2.0066	1.7725	1.2025	1.1593	1.0411	1.0228	0.988	0.9738	0.9549	0.9433	0.9314	0.9234	0.9143
gt;MAE45160 ATPase-like protein	142	1642	9.7653	9.2209	2.7868	2.4793	1.536	1.422	1.2034	1.1542	1.0898	1.064	1.0375	1.0228	1.0111	1.002	0.9958
gt;MAE42760 elongation factor Tu	184	1642	18.3933	14.9012	5.9477	4.8562	2.9905	2.5451	1.9356	1.727	1.4841	1.3776	1.2678	1.2119	1.1591	1.1283	1.1023
gt;MAE22430 transposase	87	1640	4.2511	3.636	1.3245	1.2593	1.0476	1.0358	0.9983	0.9903	0.9764	0.9629	0.9502	0.9339	0.9198	0.9044	0.8897
gt;MAE35520 unknown protein	98	1640	5.426	4.5972	1.5455	1.3926	1.0836	1.0413	0.9882	0.9693	0.949	0.934	0.9156	0.9053	0.8918	0.8862	0.8807
gt;MAE14770 nitrate/nitrite transport system ATP-binding protein	136	1640	8.0294	6.418	1.9578	1.9072	1.2461	1.2213	1.0612	1.045	0.9962	0.9868	0.9721	0.9663	0.9579	0.955	0.9517
gt;MAE20490 ABC-transporter ATP-binding protein	136	1640	11.5619	8.9525	3.4464	2.7652	1.9155	1.6632	1.4418	1.3391	1.2618	1.2176	1.1856	1.1669	1.1529	1.1428	1.1376
gt;MAE45870 RNA-binding region protein	63	1638	2.3948	2.1233	1.0474	1.0687	1.0039	1.0093	0.9983	0.9981	0.9914	0.9884	0.9847	0.9832	0.9817	0.9807	0.9803
gt;MAE50660 transposase	112	1638	6.7544	6.4097	2.0385	1.8868	1.2586	1.2062	1.0545	1.0313	0.9834	0.9731	0.9584	0.9562	0.9502	0.9493	0.9471
gt;MAE50380 GCN5-related N-acetyltransferase like	179	1638	17.3653	13.4414	5.1489	4.0432	2.5566	2.1294	1.6948	1.5093	1.3485	1.2582	1.1893	1.143	1.1106	1.087	1.0679
gt;MAE48710 thiophen and furan oxidation protein	196	1638	18.7433	14.133	5.404	4.7024	2.7653	2.5178	1.8586	1.7243	1.4527	1.3698	1.2401	1.1847	1.1172	1.0836	1.0474
gt;MAE12220 hypothetical protein	203	1638	19.8871	17.2454	6.943	6.2199	3.883	3.5843	2.7111	2.5676	2.1571	2.0723	1.8457	1.7864	1.6561	1.608	1.5243
gt;MAE63090 transposase	207	1638	25.4518	22.6642	10.2333	8.3007	5.6288	4.6062	3.6552	3.1043	2.6501	2.3352	2.0808	1.8895	1.7335	1.6042	1.4994
gt;MAE61030 C-5 cytosine-specific DNA-methylase	143	1636	10.001	9.3997	3.2158	2.6734	1.7549	1.5369	1.3206	1.2353	1.1679	1.1355	1.111	1.0989	1.0938	1.0925	1.0946
gt;MAE35110 transposase	210	1636	26.0425	23.1674	10.693	8.8444	6.0662	5.0956	4.0839	3.5515	3.0729	2.7535	2.4861	2.2841	2.1123	1.9729	1.8548
gt;MAE48970 universal stress protein	75	1634	3.006	2.411	1.0755	1.0841	0.9987	1.0148	1.0032	1.0095	1.0043	1.0086	1.0042	1.0086	1.0042	1.0086	1.0042
gt;MAE23520 two-component response regulator OmpR subfamily	100	1634	4.9897	4.079	1.4191	1.3872	1.0655	1.0806	1.0225	1.0332	1.025	1.0357	1.0408	1.0504	1.0591	1.0712	1.0834
gt;MAE31510 sulfate transport system ATP-binding protein	145	1634	8.4546	7.2338	2.103	2.0379	1.2716	1.2497	1.0673	1.0485	0.993	0.9761	0.9516	0.9422	0.9262	0.915	0.9028
gt;MAE01770 hypothetical protein	176	1634	21.2332	15.603	6.9647	5.0326	3.3489	2.6035	2.0706	1.7552	1.5382	1.3895	1.2842	1.212	1.1603	1.1225	1.0937
gt;MAE19470 3-oxoacyl-[acyl-carrier-protein] synthase III	131	1632	6.7681	5.8301	1.7458	1.8585	1.1521	1.2398	1.0308	1.0725	0.9981	1.0226	0.9932	1.0056	0.9922	0.9985	0.9903
gt;MAE53020 hypothetical protein	113	1632	6.9215	6.083	1.9044	1.6243	1.1809	1.1141	1.0511	1.0437	1.0378	1.043	1.0464	1.0522	1.0575	1.0647	1.0706
gt;MAE34460 ferrochelatase	150	1632	8.7042	6.9053	2.0455	2.08	1.2371	1.3125	1.0691	1.1159	1.027	1.0513	1.0129	1.0262	1.0085	1.0165	1.0061
gt;MAE55990 GTP-binding protein	166	1632	14.2183	12.1908	4.3664	3.7113	2.2801	2.0069	1.5951	1.4653	1.3102	1.2411	1.1737	1.1332	1.0962	1.0717	1.0528
gt;MAE58180 similar to stage II sporulation protein D	168	1632	14.7167	11.204	4.2119	3.6133	2.1596	1.9712	1.4831	1.4025	1.2086	1.1658	1.0777	1.0499	1.004	0.9829	0.9572
gt;MAE18620 putative protein phosphatase	267	1632	23.697	21.8668	7.9862	7.9077	4.6048	4.4264	3.1973	3.0302	2.4671	2.3269	2.0241	1.9134	1.7345	1.6496	1.5375
gt;MAE23210 hypothetical protein	65	1630	1.3317	1.7131	0.7925	1.1293	0.9112	1.033	0.9505	0.9972	0.9609	0.9788	0.9608	0.9669	0.9571	0.9604	0.9534
gt;MAE42580 hypothetical protein	96	1630	6.4214	4.3327	1.6226	1.3717	1.1006	1.0604	1.0254	1.0207	1.0167	1.016	1.0157	1.0157	1.0157	1.0157	1.0157
gt;MAE58380 hypothetical protein	144	1630	13.3477	10.067	3.7748	2.922	1.9237	1.6278	1.3579	1.2298	1.1308	1.0648	1.0118	0.9782	0.9524	0.9341	0.9222
gt;MAE48360 hypothetical protein	78	1628	2.1965	2.4398	0.928	1.1467	0.9388	0.9933	0.9297	0.9374	0.9095	0.909	0.8949	0.8919	0.8842	0.8819	0.8757
gt;MAE16870 cell division protein FtsW	102	1628	2.4452	2.5518	0.7367	1.3861	0.8063	1.1956	0.9146	1.1317	0.9924	1.1174	1.0526	1.1329	1.1012	1.1566	1.1416
gt;MAE01830 global nitrogen regulator Ycf28	90	1628	3.414	2.937	1.0561	1.193	0.9594	0.9958	0.936	0.9379	0.9123	0.9017	0.8846	0.8741	0.8603	0.8547	0.8466
gt;MAE59010 hypothetical protein	95	1628	4.6226	4.3042	1.3634	1.392	1.0537	1.0611	0.9856	0.9768	0.9448	0.9331	0.9144	0.904	0.8917	0.8807	0.8701
gt;MAE42390 hypothetical protein	111	1628	6.3096	5.1106	1.7449	1.5155	1.1513	1.1148	1.0645	1.0648	1.0632	1.0687	1.0725	1.0757	1.0776	1.0783	1.0793
gt;MAE33350 RNA-directed DNA polymerase	116	1628	6.8172	6.3387	1.8575	1.8451	1.1799	1.2047	1.0415	1.048	1.0007	1.0039	0.9914	0.9914	0.9876	0.9866	0.9855
gt;MAE31270 S-layer region-like precursor	160	1628	11.2127	10.9052	3.4442	3.2612	1.9189	1.7941	1.4247	1.347	1.2172	1.1698	1.1116	1.082	1.0546	1.0336	1.0152
gt;MAE24420 N-acyl-L-amino acid amidohydrolase	170	1628	12.72	11.4818	3.7086	3.6776	2.0453	2.0691	1.5254	1.5224	1.2949	1.2728	1.157	1.1353	1.0709	1.0489	1.0102
gt;MAE06030 transposase	195	1628	20.042	17.2225	7.0263	5.7479	3.6631	3.03	2.3496	2.0307	1.7473	1.5794	1.4464	1.3574	1.2873	1.24	1.2044
gt;MAE08840 leader peptidase I	129	1626	7.4026	5.3136	1.5976	1.8041	1.0032	1.256	0.9404	1.1086	0.9541	1.0525	0.969	1.025	0.9805	1.0083	0.9874
gt;MAE50300 gamma-glutamyl phosphate reductase	180	1626	13.6993	11.7248	3.8611	3.4259	2.0649	1.8213	1.454	1.3287	1.1963	1.1333	1.0764	1.042	1.0152	0.9917	0.9719
gt;MAE44930 30S ribosomal protein S2	113	1624	7.133	5.3414	1.7616	1.5169	1.1479	1.098	1.0432	1.0368	1.0273	1.0328	1.0331	1.0385	1.0409	1.0455	1.0501
gt;MAE02670 transposase	198	1624	21.1516	17.3995	7.1339	5.6196	3.5678	2.8998	2.2422	1.9288	1.6603	1.5072	1.3845	1.3028	1.2422	1.2031	1.1724
gt;MAE22840 transposase	213	1624	24.7368	22.8845	10.0476	8.4483	5.5786	4.6774	3.6397	3.1311	2.6448	2.3429	2.0801	1.8934	1.7347	1.6171	1.518
gt;MAE41980 serine/threonine protein kinase	166	1622	12.8683	12.8702	4.6332	3.9966	2.5702	2.2536	1.851	1.6925	1.5367	1.449	1.3705	1.319	1.2737	1.2379	1.2077
gt;MAE58090 transposase	164	1622	13.3794	12.4256	4.198	3.6165	2.1055	1.871	1.4488	1.3531	1.2102	1.1686	1.1181	1.105	1.0879	1.0868	1.0808
gt;MAE42090 hypothetical protein	93	1620	3.6257	3.5064	1.1346	1.2446	0.9917	1.023	0.9742	0.9824	0.961	0.9605	0.9474	0.9403	0.9298	0.9223	0.9153
gt;MAE00300 amino acid transport system permease protein	118	1618	3.4289	3.3084	0.7338	1.6156	0.7123	1.3087	0.8063	1.1887	0.8935	1.1428	0.9649	1.1368	1.0193	1.1414	1.0664
gt;MAE30200 probable potassium channel protein	152	1618	9.4467	9.159	2.5196	2.706	1.4468	1.5486	1.1678	1.2085	1.0705	1.0818	1.0211	1.0231	0.9938	0.9895	0.9741
gt;MAE55640 transposase	147	1618	10.7501	9.8831	3.2881	2.7133	1.7346	1.5134	1.2812	1.1968	1.129	1.0985	1.0766	1.0641	1.0573	1.0528	1.0508
gt;MAE18450 glucokinase	136	1618	11.0653	8.7852	3.0108	2.4525	1.5991	1.4244	1.2333	1.1795	1.1282	1.1139	1.1005	1.0964	1.094	1.0923	1.092
gt;MAE19180 N-6 DNA methylase	207	1618	25.0471	21.5151	10.2624	8.5091	6.0113	5.1072	4.198	3.7033	3.2692	2.9792	2.7326	2.55	2.3931	2.267	2.1564
gt;MAE24050 hypothetical protein	122	1616	7.7348	5.4378	1.7578	1.6666	1.1292	1.1485	1.0172	1.0325	0.99	0.9974	0.9819	0.9818	0.977	0.9756	0.9734
gt;MAE38000 Na+/H+ antiporter	185	1616	9.7268	7.0535	1.9917	2.7502	1.2044	1.7972	1.0492	1.4118	0.996	1.2173	0.966	1.0998	0.9379	1.0239	0.9057
gt;MAE05180 transposase	272	1616	34.7922	33.2149	16.0311	14.5801	10.4666	9.3834	7.8148	7.0776	6.2877	5.785	5.3117	4.9574	4.6342	4.376	4.1446
gt;MAE18890 ABC-transporter permease protein	76	1614	1.4024	1.8999	0.7467	1.2055	0.8852	1.102	0.962	1.0698	1.0001	1.0632	1.0198	1.0656	1.0328	1.0686	1.0458
gt;MAE47580 hypothetical protein	84	1614	4.4567	3.6141	1.2879	1.2326	1.0326	1.0311	1.0073	1.0093	1.0068	1.0066	1.0087	1.0072	1.0107	1.0099	1.013
gt;MAE21930 hypothetical protein	103	1614	5.3487	4.442	1.4689	1.4319	1.0682	1.0711	1.0015	1.002	0.9845	0.9864	0.9808	0.9813	0.9799	0.9802	0.9798
gt;MAE07060 4'-phosphopantetheinyl transferase	119	1614	7.8891	6.0636	1.9541	1.6479	1.1859	1.1116	1.0264	0.9942	0.9636	0.9436	0.9273	0.9146	0.9058	0.8948	0.8862
gt;MAE51920 sulfate transport system ATP-binding protein	138	1614	8.8973	6.0702	1.9994	1.8349	1.2275	1.213	1.0663	1.0663	1.0222	1.0267	1.0105	1.0159	1.0072	1.0126	1.0062
gt;MAE57960 unknown protein	65	1612	2.0866	2.0696	1.0213	1.0551	0.9993	1.0026	0.9927	0.9934	0.9849	0.9837	0.9763	0.9728	0.9639	0.9582	0.9469
gt;MAE08550 biopolymer transport ExbD protein homolog	81	1612	2.7465	2.5107	1.0077	1.13	0.9922	1.0391	1.026	1.0528	1.0584	1.0775	1.0891	1.1108	1.1257	1.1449	1.1558
gt;MAE62930 transposase	149	1612	11.2716	9.0591	2.8742	2.5471	1.5135	1.4398	1.1678	1.1435	1.0539	1.0427	1.0064	0.9982	0.9768	0.965	0.955
gt;MAE16840 transposase	147	1612	15.2195	11.7472	4.8949	3.6741	2.4261	1.9736	1.6088	1.4249	1.2874	1.2063	1.1479	1.111	1.0841	1.0646	1.0496
gt;MAE32990 photosystem II core light harvesting protein PsbB	201	1612	15.4669	11.5393	3.6328	3.9386	1.8249	2.2651	1.3218	1.6614	1.1535	1.3921	1.0812	1.2521	1.0485	1.1706	1.0381
gt;MAE08850 hypothetical protein	88	1610	4.2544	3.5418	1.2677	1.2128	1.015	1.0072	0.9846	0.9864	0.9815	0.9848	0.9813	0.9848	0.9813	0.9848	0.9813
gt;MAE07990 putative peptidase M	171	1610	9.1828	6.2856	1.8174	2.2305	1.0806	1.4628	0.9738	1.217	0.9792	1.126	1.0046	1.0887	1.0291	1.083	1.0562
gt;MAE10930 UDP-glucose 4-epimerase	130	1610	9.2524	7.0314	2.4049	2.0969	1.3751	1.2772	1.1007	1.0607	1.0022	0.9792	0.9562	0.9446	0.9327	0.925	0.9173
gt;MAE61550 transposase	170	1610	16.8736	14.4944	5.7711	4.7681	3.0629	2.5922	2.0493	1.811	1.5886	1.4614	1.3538	1.282	1.2209	1.1756	1.1402
gt;MAE53850 chromosome partitioning protein	82	1608	2.7229	2.7093	1.0098	1.1724	0.9833	1.0324	0.9944	1.0078	0.9957	1.0004	0.9944	0.996	0.9916	0.9919	0.9893
gt;MAE18380 phosphate-binding periplasmic protein	141	1608	9.4533	7.5478	2.5532	2.2755	1.5385	1.4107	1.2254	1.1592	1.0916	1.0579	1.0287	1.01	0.9938	0.9797	0.9669
gt;MAE52540 RNA polymerase alpha subunit	134	1608	10.9419	7.8684	2.9214	2.4594	1.6393	1.482	1.2642	1.1933	1.1119	1.0751	1.0369	1.0162	0.9941	0.9792	0.9666
gt;MAE58670 competence protein ComE	246	1608	19.095	16.2503	5.2994	5.9801	3.045	3.4166	2.2287	2.3912	1.8284	1.8884	1.5969	1.6118	1.448	1.4384	1.3445
gt;MAE60130 transposase	207	1608	23.6496	21.7464	9.3823	7.8701	5.1561	4.3444	3.3729	2.922	2.4714	2.2074	1.9634	1.8035	1.6605	1.5546	1.4638
gt;MAE17470 unknown protein	84	1606	3.8398	3.3182	1.2228	1.1862	1.0086	0.9964	0.9651	0.9568	0.9455	0.9395	0.9336	0.9308	0.9284	0.9264	0.9248
gt;MAE14650 short-chain dehydrogenase/reductase family oxidoreductase	100	1606	6.0173	4.3909	1.5813	1.4154	1.1166	1.0975	1.057	1.0658	1.0681	1.0802	1.0912	1.1013	1.1122	1.1197	1.1273
gt;MAE59700 hypothetical protein	112	1606	6.3929	5.418	1.6488	1.5406	1.1167	1.0909	1.0243	1.0171	1.0062	1.005	1.0002	1.0006	0.9985	0.9984	0.9973
gt;MAE25170 c-type cytochrome biogenesis protein Ccs1	171	1606	13.4052	11.5221	3.767	3.8894	2.1395	2.2614	1.6173	1.6729	1.3787	1.3946	1.2418	1.2342	1.1449	1.1291	1.0771
gt;MAE62230 hypothetical protein	86	1604	2.797	2.5204	0.9202	1.2152	0.9112	1.0444	0.9275	0.9858	0.925	0.95	0.9145	0.9244	0.8998	0.9013	0.8814
gt;MAE51710 unknown protein	102	1604	6.31	4.4689	1.6232	1.545	1.1214	1.1373	1.0319	1.0458	1.0165	1.0253	1.0157	1.0264	1.0221	1.0328	1.0332
gt;MAE62410 hypothetical protein	137	1604	8.5282	6.6741	1.9842	1.8517	1.1703	1.1714	1.0092	1.0081	0.9553	0.9512	0.9318	0.9262	0.9142	0.9084	0.9026
gt;MAE22820 six-hairpin glycosidase-like	297	1604	36.6721	35.7209	17.2098	15.8725	11.3985	10.3295	8.6152	7.8617	6.9895	6.4565	5.9315	5.5417	5.1857	4.8934	4.6323
gt;MAE10290 putative peptidase	121	1602	4.9258	3.5972	1.0505	1.5599	0.8492	1.2225	0.8949	1.1181	0.9496	1.0849	0.993	1.0772	1.025	1.0831	1.0522
gt;MAE56760 radical S-adenosylmethionine superfamily protein	134	1602	8.263	7.7223	2.4241	2.2497	1.4496	1.3649	1.1705	1.1267	1.0691	1.0473	1.0251	1.0102	0.9974	0.9863	0.9796
gt;MAE18220 hypothetical protein	140	1602	13.1447	9.8854	3.7893	2.7535	1.8061	1.4782	1.2418	1.1262	1.0485	1.0039	0.9709	0.9506	0.937	0.9294	0.9256
gt;MAE55610 transposase	276	1602	36.5828	35.0258	17.1802	15.4534	11.179	9.9521	8.3106	7.4965	6.6581	6.1099	5.6012	5.2166	4.871	4.5908	4.3377
gt;MAE09910 transposase	118	1600	9.0872	7.1265	2.5689	2.1081	1.4628	1.3124	1.1787	1.1328	1.1004	1.0955	1.0912	1.0913	1.0911	1.0911	1.0911
gt;MAE56790 hypothetical protein	77	1598	3.3448	3.2115	1.2239	1.1807	1.0269	1.013	0.9934	0.9853	0.9776	0.9694	0.9617	0.9511	0.9395	0.928	0.9143
gt;MAE50350 band 7 protein like	116	1598	5.8004	5.0753	1.4999	1.5817	1.0539	1.1108	0.9776	0.9928	0.9434	0.9462	0.9195	0.9202	0.9039	0.9004	0.8911
gt;MAE61210 HAD-superfamily hydrolase subfamily IA, variant 3	109	1598	6.0863	4.9612	1.5378	1.4628	1.0923	1.0976	1.0464	1.0591	1.0602	1.0753	1.085	1.1013	1.113	1.1275	1.1359
gt;MAE05540 L-asparaginase II	136	1598	9.9008	7.5964	2.459	2.0701	1.374	1.2662	1.1224	1.0861	1.0483	1.0358	1.0213	1.0163	1.0103	1.0089	1.007
gt;MAE29760 sodium/solute symporter	153	1596	4.1622	3.6887	0.7943	1.7386	0.6559	1.3878	0.7167	1.2314	0.7625	1.1308	0.7932	1.0608	0.8156	1.0026	0.8267
gt;MAE44820 peptidyl-prolyl cis-trans isomerase B	88	1596	4.2383	3.3963	1.264	1.1861	1.0232	1.0095	0.9879	0.9783	0.971	0.9633	0.9572	0.9523	0.9478	0.9415	0.9378
gt;MAE09680 putative methyltransferase	118	1596	8.0591	6.0875	2.0055	1.714	1.2107	1.1631	1.0783	1.0845	1.0703	1.08	1.0789	1.084	1.0854	1.0862	1.0866
gt;MAE28990 hypothetical protein	116	1596	8.0916	6.8847	2.2937	1.96	1.3482	1.2453	1.1152	1.083	1.0493	1.0381	1.0286	1.0256	1.0235	1.0239	1.024
gt;MAE49950 hypothetical protein	139	1594	9.8233	9.0596	3.2233	2.7528	1.8312	1.6144	1.3797	1.2882	1.2105	1.1728	1.1425	1.1301	1.1168	1.1148	1.1111
gt;MAE34000 aldose 1-epimerase	128	1594	10.8451	8.5036	2.9327	2.3012	1.5004	1.3098	1.1398	1.0779	1.0337	1.0138	1.0019	0.9961	0.9929	0.9917	0.9908
gt;MAE55900 pyrroline-5-carboxylate reductase	97	1592	2.9459	2.9368	0.9679	1.2469	0.9615	1.0516	0.9771	1.0132	0.9787	1.0068	0.9826	1.0062	0.9859	1.0065	0.9879
gt;MAE53340 alpha-helical coiled-coil protein SrpF	90	1592	4.2936	3.9039	1.2919	1.2737	1.029	1.0293	0.9937	0.9943	0.9814	0.9828	0.9771	0.9769	0.9712	0.9696	0.9649
gt;MAE43600 hypothetical protein	174	1592	15.8505	13.6756	4.903	4.4533	2.6928	2.4226	1.8739	1.717	1.5001	1.4104	1.311	1.2614	1.2167	1.1893	1.1674
gt;MAE23650 leader peptidase I	85	1590	3.1082	2.8585	1.0893	1.1599	1.005	1.0306	1.0099	1.0227	1.0206	1.0279	1.0299	1.0367	1.0423	1.0507	1.0597
gt;MAE16020 FdxN element excision controlling factor protein XisH	76	1590	3.3192	2.8349	1.1497	1.1228	1.0152	1.0145	1.0051	1.0062	1.0035	1.0039	1.0014	1.0024	1.0002	1.0015	0.9994
gt;MAE31560 hypothetical protein	104	1588	5.3211	4.4012	1.4426	1.381	1.0642	1.0509	0.9961	0.9883	0.9725	0.9664	0.9569	0.9516	0.9438	0.936	0.928
gt;MAE53930 DNA polymerase III gamma/tau subunit	261	1588	23.286	20.3359	7.7319	7.9371	4.63	4.6818	3.3421	3.3064	2.6417	2.579	2.2122	2.1468	1.9254	1.8632	1.7204
gt;MAE51730 cadmium resistance transporter	64	1586	1.4337	1.7997	0.8924	1.0767	0.9547	1.007	0.9694	0.9908	0.9722	0.9834	0.9736	0.9811	0.9739	0.9803	0.9742
gt;MAE43510 hypothetical protein	74	1586	3.0518	2.916	1.1873	1.1436	1.0245	1.0172	1.0068	1.0065	1.0064	1.0064	1.0075	1.0087	1.0097	1.011	1.0131
gt;MAE17400 short-chain dehydrogenase/reductase SDR	101	1586	5.0225	4.3793	1.4254	1.4134	1.0842	1.0964	1.0529	1.0737	1.0726	1.0909	1.0996	1.1118	1.1172	1.1225	1.1239
gt;MAE30030 hypothetical protein	72	1584	2.6659	2.5584	1.1135	1.0881	0.9945	0.9831	0.9608	0.954	0.9427	0.9363	0.9309	0.9274	0.9248	0.9238	0.923
gt;MAE28310 hypothetical protein	90	1584	4.0561	3.8811	1.3368	1.2887	1.0575	1.045	1.0211	1.0208	1.017	1.0167	1.0161	1.016	1.0159	1.016	1.0159
gt;MAE11620 transposase	106	1584	5.7434	5.1953	1.6033	1.5051	1.1075	1.0756	1.008	0.9963	0.9796	0.9759	0.9657	0.9612	0.9506	0.9463	0.9411
gt;MAE10560 hypothetical protein	114	1582	6.7363	5.2689	1.6502	1.621	1.12	1.1424	1.0273	1.0327	1.0004	1.003	0.9904	0.9889	0.9799	0.9772	0.9726
gt;MAE51440 cation-transporting P-type ATPase	266	1582	24.3662	22.8449	9.0128	9.3779	5.7636	5.82	4.3688	4.2889	3.5741	3.4538	3.0488	2.9309	2.6837	2.5779	2.4145
gt;MAE57800 segregation and condensation protein A	102	1580	4.2981	3.6589	1.2716	1.4053	1.0291	1.0832	0.9739	0.9906	0.942	0.9446	0.9162	0.9167	0.902	0.895	0.8814
gt;MAE22860 GTP cyclohydrolase I	101	1580	4.8898	4.4502	1.4752	1.3538	1.0864	1.066	1.0427	1.0458	1.0425	1.047	1.0469	1.0485	1.0489	1.0491	1.0491
gt;MAE56850 hypothetical protein	140	1580	10.6591	9.6058	3.3433	2.7887	1.8162	1.58	1.3325	1.2258	1.1324	1.0809	1.0356	1.009	0.9888	0.971	0.9571
gt;MAE61150 hypothetical protein	145	1580	14.1851	10.3001	4.2903	3.4658	2.1415	1.9313	1.4725	1.4204	1.2395	1.2316	1.1574	1.164	1.1333	1.1455	1.134
gt;MAE57950 unknown protein	70	1578	2.8863	2.4899	1.1036	1.1009	1.0096	1.0155	1.0066	1.011	1.0087	1.0126	1.0123	1.0167	1.0166	1.021	1.0219
gt;MAE22130 hypothetical protein	82	1578	4.1278	3.5341	1.2927	1.2547	1.0418	1.0439	1.0141	1.0156	1.0118	1.0117	1.0119	1.0105	1.0112	1.0109	1.0113
gt;MAE31380 phosphoribosyl aminoidazole succinocarboxamide synthetase	116	1578	6.3841	4.9332	1.5669	1.5843	1.0791	1.1404	1.0145	1.0476	1.0151	1.0347	1.0298	1.0437	1.0504	1.0638	1.0759
gt;MAE01290 hypothetical protein	139	1578	10.6196	8.5932	2.7951	2.3016	1.4516	1.3172	1.1327	1.0898	1.0431	1.0279	1.0148	1.0083	1.0046	1.0029	1.0009
gt;MAE36470 hypothetical protein	150	1578	12.5905	10.7301	3.9537	3.1984	2.0445	1.7731	1.4571	1.3489	1.241	1.1931	1.1489	1.1264	1.1056	1.0944	1.0882
gt;MAE38320 N-acyl-L-amino acid amidohydrolase	163	1578	15.1316	12.1384	4.734	3.8807	2.518	2.1164	1.7067	1.5127	1.3477	1.2493	1.1712	1.1181	1.077	1.0467	1.0214
gt;MAE46650 G-protein-signaling modulator 2	218	1578	22.1148	20.895	8.5479	7.5502	4.7939	4.1199	3.1422	2.7419	2.3009	2.0598	1.829	1.6843	1.5552	1.4623	1.3847
gt;MAE02030 hypothetical protein	52	1576	1.3266	1.5062	0.9277	1.0488	0.9952	1.0208	1.0132	1.0224	1.0209	1.0251	1.0248	1.0271	1.0266	1.0276	1.0277
gt;MAE57860 hypothetical protein	65	1576	2.0742	2.0297	1.011	1.0538	1.0016	1.0119	1.011	1.0189	1.0233	1.0338	1.0421	1.0498	1.0601	1.067	1.0746
gt;MAE25490 hypothetical protein	128	1576	7.6003	7.7183	2.192	2.0875	1.3014	1.2589	1.084	1.0705	1.0232	1.0177	1.0023	0.9996	0.9948	0.9934	0.9915
gt;MAE38860 septum site-determining protein MinC	121	1576	7.6217	5.9699	2.0649	1.7177	1.2643	1.1679	1.0885	1.0625	1.0474	1.0437	1.0447	1.0479	1.0499	1.0558	1.0612
gt;MAE18870 putative hydrogenase expression/formation protein HypB	110	1576	8.3612	5.5908	2.0593	1.6979	1.2402	1.1838	1.095	1.0936	1.0749	1.0744	1.071	1.0717	1.0715	1.0715	1.0715
gt;MAE34060 transposase	225	1574	25.1179	22.5994	10.3003	9.2397	6.4172	5.75	4.7246	4.2988	3.812	3.5327	3.2583	3.0653	2.8841	2.7445	2.6177
gt;MAE52020 transposase like	275	1574	35.9827	34.7379	16.9119	15.3668	11.0839	9.9247	8.2768	7.487	6.6505	6.1093	5.6034	5.2209	4.8792	4.5975	4.3483
gt;MAE46860 transposase	93	1572	4.7895	3.8774	1.3448	1.3521	1.0461	1.0687	1.0096	1.0219	1.0088	1.0139	1.0093	1.0117	1.0093	1.0098	1.0093
gt;MAE56750 putative sensor protein	211	1572	20.424	17.3866	6.979	6.2056	3.8557	3.4443	2.6048	2.3584	1.9868	1.8315	1.6415	1.5426	1.4331	1.3615	1.2957
gt;MAE26660 precorrin methylase	76	1570	3.5939	2.6509	1.1082	1.1932	1.0137	1.0754	1.0439	1.0844	1.0791	1.1011	1.1023	1.1135	1.1137	1.118	1.1181
gt;MAE03120 hypothetical protein	96	1570	6.0878	4.5945	1.5734	1.3959	1.0912	1.0705	1.0266	1.0323	1.028	1.0399	1.0422	1.0511	1.058	1.0669	1.0727
gt;MAE11270 putative peptidase	157	1570	9.5921	7.1338	2.1269	2.3476	1.1729	1.4598	1.0044	1.2028	0.9936	1.119	1.0113	1.0892	1.0362	1.0857	1.0564
gt;MAE27050 L-glutamine:D-fructose-6-P amidotransferase	283	1570	32.4545	30.9959	13.8004	13.6143	9.0546	8.7231	6.875	6.5699	5.6395	5.3847	4.8503	4.6376	4.3008	4.1239	3.8918
gt;MAE28490 hypothetical protein	82	1568	4.2518	3.4948	1.3201	1.2083	1.0409	1.0258	1.0095	1.0085	1.0073	1.0078	1.0075	1.0077	1.0076	1.0078	1.0077
gt;MAE18650 Trk system potassium uptake protein TrkA	106	1568	4.7996	4.7168	1.363	1.4435	1.0663	1.0944	1.0426	1.0638	1.0602	1.0694	1.0707	1.0714	1.0724	1.0729	1.0732
gt;MAE54350 pantothenate synthetase/cytidylate kinase	220	1568	19.4094	15.6469	5.826	5.2765	3.1487	2.8428	2.1192	1.9444	1.6333	1.5229	1.3774	1.3105	1.2342	1.1934	1.1524
gt;MAE44520 hypothetical protein	106	1566	5.2615	4.9266	1.4988	1.5348	1.0895	1.1166	1.0239	1.0333	1.0106	1.0166	1.0115	1.0155	1.0166	1.0209	1.025
gt;MAE15590 peptidase S1 and S6, chymotrypsin/Hap	115	1566	7.2294	5.9754	1.9765	1.7342	1.2223	1.1445	1.0406	1.0122	0.9806	0.9637	0.9464	0.9386	0.93	0.924	0.9176
gt;MAE33710 putative modulator of DNA gyrase	211	1566	23.433	21.1119	9.218	8.0861	5.3979	4.7021	3.7386	3.3111	2.858	2.5886	2.3368	2.1625	2.0081	1.8869	1.7828
gt;MAE56770 hypothetical protein	101	1562	5.4838	4.8003	1.538	1.4121	1.0799	1.0486	0.9903	0.9726	0.9532	0.9434	0.93	0.921	0.9128	0.9072	0.9001
gt;MAE43920 adenylate cyclase	141	1562	8.5261	8.9901	2.7094	2.5057	1.5545	1.435	1.2165	1.1669	1.1065	1.0885	1.0746	1.0725	1.0746	1.0794	1.0847
gt;MAE28040 hypothetical protein	149	1562	10.9731	7.8649	2.6474	2.299	1.4799	1.3678	1.1638	1.1134	1.0502	1.0307	1.0079	0.9999	0.989	0.9855	0.98
gt;MAE26050 anti-sigma-factor antagonist and sugar transfersase	157	1562	11.4484	9.8848	3.0651	3.1075	1.6758	1.7328	1.2701	1.305	1.1309	1.1565	1.0873	1.1052	1.0801	1.0943	1.0886
gt;MAE16860 asparaginase	131	1562	12.3284	9.0093	3.7691	2.8493	1.9935	1.6748	1.4356	1.3117	1.2194	1.1631	1.1199	1.0909	1.0694	1.0519	1.0392
gt;MAE17740 band 7 protein	192	1562	20.8204	16.9952	6.9779	5.8001	3.6249	3.0657	2.3364	2.0413	1.74	1.5827	1.4395	1.3528	1.2776	1.2262	1.1897
gt;MAE14790 nitrate/nitrite transport system permease protein	85	1560	1.7236	2.3599	0.7492	1.3002	0.866	1.1309	0.9456	1.0798	0.988	1.0618	1.0125	1.0558	1.0279	1.0541	1.0395
gt;MAE57060 hypothetical protein	76	1560	2.2216	2.6663	0.9686	1.1448	0.966	0.996	0.9587	0.9712	0.9465	0.9492	0.9312	0.9268	0.9144	0.9099	0.903
gt;MAE18140 dTDP-glucose 4,6-dehydratase	142	1558	13.1865	9.8551	3.5763	2.6621	1.7233	1.447	1.2341	1.1447	1.086	1.0592	1.0401	1.0336	1.0297	1.0266	1.0261
gt;MAE49560 aspartate kinase	227	1558	17.2649	15.1953	5.1203	5.8189	3.011	3.5534	2.2506	2.6405	1.897	2.1728	1.6992	1.8866	1.5661	1.6973	1.4765
gt;MAE59180 hypothetical protein	66	1556	1.8243	1.9236	0.9655	1.0765	1.0051	1.0396	1.0356	1.0567	1.062	1.0804	1.0914	1.1091	1.1192	1.131	1.1374
gt;MAE50050 PHA-specific acetoacetyl-CoA reductase PhaB	92	1556	3.4581	3.3031	1.0869	1.2238	0.9793	1.014	0.9663	0.9713	0.9503	0.9492	0.9395	0.9362	0.9324	0.929	0.9244
gt;MAE45840 serine acetyltransferase	81	1556	3.499	2.8806	1.1532	1.1974	1.0102	1.0322	0.9974	1.0067	1.0002	1.0043	1.0014	1.0064	1.0024	1.008	1.0055
gt;MAE08810 hypothetical protein YCF21	98	1556	4.4358	3.6297	1.2272	1.2662	1.0257	1.0736	1.0356	1.0678	1.06	1.0837	1.085	1.0999	1.1018	1.1073	1.1081
gt;MAE60560 hypothetical protein	92	1556	4.9899	4.1444	1.4347	1.3005	1.0669	1.0434	1.0163	1.0159	1.0108	1.0121	1.0104	1.0123	1.0112	1.0124	1.0119
gt;MAE15510 transposase	102	1556	7.2284	4.8882	1.972	1.7012	1.2384	1.1881	1.0737	1.0656	1.035	1.0348	1.0263	1.0279	1.0263	1.0283	1.0292
gt;MAE52130 hypothetical protein	140	1556	9.0163	7.4324	2.3326	2.2244	1.3625	1.3475	1.1134	1.1007	1.0178	0.9999	0.9613	0.9445	0.9215	0.9091	0.8955
gt;MAE03870 hypothetical protein	98	1554	1.7951	2.3974	0.5328	1.5124	0.6529	1.2901	0.7766	1.1864	0.8769	1.1414	0.9567	1.135	1.029	1.1568	1.0905
gt;MAE38940 transposase	99	1554	6.937	4.3106	1.65	1.4268	1.1172	1.1102	1.0567	1.079	1.0738	1.0967	1.1012	1.1142	1.1207	1.1299	1.134
gt;MAE17770 glycosyl transferase group 1	133	1554	8.1372	6.5945	2.1603	2.0598	1.3654	1.3077	1.1406	1.1166	1.0637	1.0563	1.037	1.0364	1.0289	1.0298	1.0256
gt;MAE04590 glycogen phosphorylase	141	1554	8.7346	8.5048	2.4763	2.5653	1.5009	1.5034	1.2128	1.2103	1.1178	1.1172	1.0879	1.0943	1.0875	1.0932	1.0953
gt;MAE26970 transposase	197	1554	23.0965	19.5314	9.1847	7.489	5.3082	4.4826	3.7144	3.2729	2.9042	2.6418	2.4288	2.2655	2.1263	2.0112	1.9158
gt;MAE45740 protein of unknown function DUF820	134	1552	9.1912	7.178	2.3347	1.9172	1.3151	1.2034	1.0938	1.0643	1.0417	1.0369	1.0349	1.0369	1.0386	1.0419	1.0454
gt;MAE38400 putative translation initiation factor EIF-2b subunit 1	146	1552	11.2003	7.7782	2.696	2.2756	1.4467	1.3349	1.1267	1.0929	1.0253	1.0174	0.99	0.9923	0.9779	0.9824	0.9739
gt;MAE52600 glycolate oxidase subunit GlcD	184	1552	15.1081	12.6181	4.5313	4.1537	2.4619	2.2589	1.7027	1.5822	1.3593	1.2853	1.18	1.1384	1.0847	1.0621	1.0286
gt;MAE60540 hypothetical protein	157	1552	16.0628	11.9446	4.7334	3.5585	2.2949	1.8693	1.5208	1.3568	1.2366	1.1699	1.125	1.0975	1.0795	1.0684	1.0625
gt;MAE43270 unknown protein	206	1552	23.8031	21.1339	9.5305	8.6391	5.782	5.3339	4.2178	3.9519	3.4007	3.2203	2.9066	2.7717	2.5762	2.4714	2.3369
gt;MAE02560 ACR3 family arsenite transporter	98	1550	2.102	2.5143	0.6482	1.4337	0.744	1.2311	0.8608	1.1506	0.951	1.1283	1.0221	1.1448	1.0812	1.1674	1.1308
gt;MAE29900 GDP-fucose synthetase	123	1550	7.3738	6.36	2.0063	1.9247	1.244	1.2161	1.0528	1.0351	0.9777	0.9634	0.9354	0.9248	0.9105	0.9015	0.8905
gt;MAE50080 photosystem II extrinsic protein PsbQ	73	1548	2.6228	2.3684	0.9907	1.1046	0.9664	0.996	0.9598	0.9637	0.9491	0.9476	0.9409	0.9387	0.9354	0.9342	0.9332
gt;MAE11150 hypothetical protein	72	1548	3.3384	2.8219	1.1805	1.1375	1.027	1.0243	1.0169	1.0169	1.0162	1.0172	1.017	1.0175	1.018	1.018	1.0188
gt;MAE42520 thymidylate kinase	101	1548	6.0011	4.3786	1.5029	1.3496	1.0782	1.0683	1.0361	1.0443	1.0401	1.0449	1.0444	1.0458	1.0462	1.0463	1.0464
gt;MAE04410 asparaginyl-tRNA synthetase	225	1548	27.0388	23.8652	10.6166	9.6733	6.6172	6.1382	4.9974	4.7066	4.1466	3.9413	3.6159	3.4605	3.251	3.1294	2.9813
gt;MAE50750 transposase	209	1548	27.4774	25.1604	12.3218	10.6968	7.7007	6.8042	5.6751	5.147	4.5893	4.247	3.9183	3.6829	3.4664	3.2942	3.1364
gt;MAE18920 hypothetical protein	59	1546	1.5936	1.7568	0.9617	1.03	0.9674	0.9755	0.9533	0.9508	0.93	0.9252	0.9113	0.9062	0.8986	0.8964	0.8961
gt;MAE60920 hypothetical protein	126	1546	8.0487	6.3735	2.0891	2.0569	1.2795	1.3154	1.0734	1.0948	1.0042	1.0153	0.9765	0.9816	0.9639	0.9667	0.9578
gt;MAE19190 unknown protein	120	1546	9.8973	8.1296	2.9652	2.3166	1.5781	1.3723	1.209	1.1436	1.1018	1.0824	1.0728	1.0687	1.0682	1.068	1.0678
gt;MAE16090 hypothetical protein	271	1546	31.8924	32.3475	15.0344	14.7644	10.2266	9.6181	7.8069	7.2559	6.342	5.9067	5.3659	5.0293	4.6746	4.4177	4.1662
gt;MAE26870 transposase	276	1546	35.9276	34.4239	16.6755	15.1933	10.9005	9.7702	8.1248	7.3463	6.5094	5.9766	5.4743	5.0987	4.7605	4.4836	4.2386
gt;MAE21460 histidinol dehydrogenase	184	1544	13.5155	10.3971	3.5145	3.4684	1.9148	2.0244	1.4559	1.5295	1.2664	1.313	1.1724	1.197	1.1157	1.1274	1.0781
gt;MAE01280 putative excinuclease ATPase subunit	219	1544	28.8534	26.1078	12.9438	10.9034	7.9095	6.8061	5.6654	5.0393	4.4648	4.078	3.7409	3.4847	3.264	3.0846	2.9279
gt;MAE20640 hypothetical protein	76	1542	3.707	3.03	1.2136	1.152	1.0139	1.0029	0.9865	0.9849	0.9799	0.9788	0.9759	0.9746	0.9735	0.9717	0.9712
gt;MAE59960 putative methyltransferase	118	1542	7.8663	7.408	2.3786	2.193	1.417	1.3343	1.143	1.1057	1.0429	1.0173	0.9879	0.9712	0.9534	0.9417	0.9312
gt;MAE04940 hypothetical protein	175	1542	14.9265	11.7017	4.2118	3.6114	2.1741	1.9397	1.5108	1.3974	1.2382	1.1749	1.1076	1.0719	1.0379	1.0191	1.0021
gt;MAE21030 transposase	194	1542	22.3383	19.9422	9.0399	7.5805	5.173	4.3687	3.5121	3.0578	2.6538	2.3877	2.1627	1.9974	1.8562	1.7461	1.6546
gt;MAE21860 FdxN element excision controlling factor protein	113	1540	8.2999	6.0672	2.2281	1.7966	1.3133	1.188	1.0863	1.043	1.0079	0.9884	0.9718	0.9583	0.9472	0.9373	0.9294
gt;MAE00840 hypothetical protein	289	1540	25.9131	25.9888	9.96	11.8338	6.6908	7.7945	5.2259	5.9247	4.3738	4.8499	3.8168	4.1559	3.4211	3.6631	3.1206
gt;MAE56900 hypothetical protein	111	1538	4.5533	3.7381	1.1118	1.3995	0.973	1.1071	0.9881	1.0455	1.0045	1.0321	1.0144	1.0335	1.0189	1.0355	1.0242
gt;MAE09270 phosphate transport system permease protein	103	1536	2.3173	2.4865	0.6995	1.342	0.8198	1.1673	0.9236	1.1226	0.9911	1.1137	1.04	1.1156	1.0751	1.1243	1.1077
gt;MAE19910 HNH endonuclease	77	1536	4.3434	3.3797	1.4122	1.2305	1.0656	1.0404	1.0223	1.0214	1.0233	1.0291	1.0326	1.0374	1.0415	1.0448	1.0466
gt;MAE34240 hypothetical protein	142	1536	14.3288	10.6194	4.1066	2.9953	1.9571	1.5914	1.3264	1.1925	1.1029	1.0492	1.0066	0.9751	0.9514	0.9326	0.9188
gt;MAE19050 hypothetical protein	207	1536	17.181	13.037	4.4488	4.1855	2.3026	2.3081	1.6197	1.6512	1.3405	1.3641	1.2086	1.2196	1.1362	1.1452	1.0974
gt;MAE22890 chromosomal replication initiator protein DnaA	216	1536	22.6661	19.2525	7.5316	6.5673	4.1115	3.5536	2.7405	2.4133	2.0649	1.8669	1.691	1.5711	1.4681	1.3939	1.3332
gt;MAE22790 unknown protein	258	1536	28.8559	27.0183	11.7403	11.6396	7.4851	7.3171	5.5879	5.4067	4.5344	4.3673	3.8709	3.7257	3.4183	3.2918	3.0884
gt;MAE51690 cysteine synthase	125	1534	5.8845	4.1049	1.1892	1.5762	0.8836	1.2172	0.9072	1.1186	0.9494	1.0795	0.9763	1.0588	0.9893	1.0466	0.9974
gt;MAE28480 hypothetical protein	113	1534	10.7116	7.6016	2.9913	2.216	1.5588	1.3394	1.1884	1.1206	1.0787	1.0571	1.0448	1.0392	1.0375	1.0364	1.0383
gt;MAE49330 hypothetical protein	264	1534	26.262	24.4556	9.9975	10.3082	6.3248	6.4772	4.7804	4.8311	3.9456	3.939	3.4209	3.3812	3.0549	3.0007	2.7812
gt;MAE53690 hypothetical protein	67	1532	2.3089	2.3165	1.0233	1.0972	0.9959	1.0207	1.0094	1.0256	1.0313	1.0407	1.0477	1.0562	1.0619	1.068	1.0732
gt;MAE59150 ribosomal-protein-alanine acetyltransferase	98	1532	6.8562	4.8317	1.8167	1.5409	1.1552	1.091	1.001	0.9754	0.9479	0.936	0.9219	0.9144	0.9089	0.9059	0.9051
gt;MAE24900 putative peptidase	229	1532	20.9264	19.6141	8.1564	7.8234	5.1245	4.7578	3.7581	3.4769	3.0061	2.7979	2.5409	2.3939	2.2364	2.1283	2.0212
gt;MAE59740 D-xylulose kinase	162	1530	11.7591	9.9323	3.3386	3.1438	1.8372	1.7589	1.3498	1.3075	1.1516	1.1248	1.056	1.0403	1.0057	0.9935	0.9713
gt;MAE28130 hydantoinase B/oxoprolinase	197	1530	20.0553	17.293	7.3208	6.6684	4.4903	4.112	3.3768	3.1342	2.8067	2.6342	2.4525	2.3257	2.207	2.114	2.027
gt;MAE15130 periplasmic beta-type carbonic anhydrase	106	1528	6.631	5.2077	1.6547	1.5781	1.0925	1.1254	1.0226	1.0485	1.0243	1.0365	1.0293	1.0333	1.0324	1.0336	1.0335
gt;MAE43840 hypothetical protein	209	1528	24.3168	21.7824	9.3111	7.764	5.088	4.252	3.3314	2.8685	2.4465	2.1789	1.9521	1.7867	1.6491	1.5366	1.4458
gt;MAE23250 lactoylglutathione lyase	57	1526	1.9038	1.8612	0.9994	1.0481	0.9945	1.0049	0.9967	0.9961	0.995	0.9913	0.9915	0.9872	0.9885	0.9854	0.9876
gt;MAE00640 putative peptidase PatA homolog	157	1526	11.7565	11.629	3.7813	3.4475	2.0376	1.8333	1.4471	1.3439	1.2172	1.1728	1.1265	1.112	1.096	1.0953	1.0925
gt;MAE05630 protein-export membrane protein SecD	171	1526	11.783	10.9572	3.5895	3.438	2.0725	1.9197	1.5131	1.4071	1.2544	1.1931	1.1252	1.0904	1.0545	1.0349	1.0154
gt;MAE00810 GTP binding protein	182	1526	14.3541	10.9309	3.6917	3.4438	1.8497	1.8784	1.3195	1.3746	1.1376	1.181	1.0661	1.0989	1.041	1.0648	1.0317
gt;MAE28170 histidinol-phosphate aminotransferase	177	1526	20.2984	15.8969	6.9251	5.6196	3.7325	3.1681	2.5231	2.2338	1.953	1.7895	1.6453	1.5459	1.462	1.4013	1.3465
gt;MAE16470 transposase	194	1526	21.3881	19.0925	8.207	6.8595	4.4982	3.7516	2.9261	2.5128	2.1392	1.9074	1.7108	1.5768	1.4663	1.3836	1.3199
gt;MAE09430 unknown protein	103	1524	5.3031	5.1549	1.6657	1.5939	1.1563	1.1383	1.0603	1.0666	1.0555	1.065	1.0656	1.0706	1.0714	1.0727	1.0731
gt;MAE16190 4-hydroxy-3-methylbut-2-enyl diphosphate reductase	181	1524	17.3421	14.3041	5.3945	4.5623	2.7782	2.4121	1.8622	1.6799	1.4683	1.3709	1.2766	1.2229	1.1754	1.1472	1.1233
gt;MAE56460 orotate phosphoribosyltransferase	74	1522	2.7977	2.5165	1.0731	1.1342	1.0175	1.0414	1.0333	1.0475	1.055	1.0647	1.0732	1.083	1.0941	1.1069	1.1177
gt;MAE30100 transposase	167	1522	14.1856	13.6759	4.7007	3.8557	2.3288	1.9456	1.5463	1.3792	1.2404	1.1625	1.1069	1.0664	1.0396	1.0155	0.9964
gt;MAE46180 recombinase	193	1522	18.8841	15.2172	5.9415	5.0475	3.0406	2.654	1.9941	1.7949	1.5265	1.4147	1.2867	1.2177	1.1443	1.0963	1.0554
gt;MAE01030 hypothetical protein	177	1522	20.6357	16.5259	7.3737	5.838	3.9557	3.2713	2.6374	2.2995	2.0157	1.8298	1.6797	1.5687	1.4756	1.4053	1.3434
gt;MAE51600 transposase	187	1522	22.8839	20.5802	9.6785	8.1085	5.6849	4.8375	3.9643	3.4989	3.0862	2.8118	2.5814	2.404	2.2588	2.1376	2.0383
gt;MAE10840 unknown protein	142	1518	4.9325	4.1779	0.9746	1.9444	0.901	1.4691	0.9305	1.2554	0.9613	1.153	0.9852	1.1049	1.0021	1.0815	1.0182
gt;MAE32930 hypothetical protein	113	1518	6.3768	5.044	1.5613	1.5449	1.1149	1.1265	1.0494	1.0616	1.0548	1.0723	1.0777	1.0913	1.1007	1.1108	1.1189
gt;MAE34770 hypothetical protein	167	1518	19.5174	16.8225	8.2388	6.9236	5.0942	4.3951	3.7297	3.3393	3.0034	2.7632	2.5627	2.4001	2.2598	2.1453	2.044
gt;MAE27910 hypothetical protein	88	1516	3.8035	3.9413	1.2811	1.397	1.065	1.0934	1.0311	1.0416	1.0315	1.0393	1.0421	1.0486	1.0567	1.0665	1.0785
gt;MAE36900 3-isopropylmalate dehydratase small subunit	88	1516	4.0953	3.9406	1.3488	1.2751	1.0426	1.0186	0.9815	0.9676	0.9583	0.9524	0.9448	0.9379	0.9326	0.9259	0.9174
gt;MAE56560 bacilysin biosynthesis protein BacA homolog	80	1516	4.2379	2.9494	1.3003	1.2039	1.0576	1.0466	1.0286	1.0368	1.0353	1.0445	1.0513	1.0559	1.0613	1.0675	1.0722
gt;MAE44770 unknown protein	150	1516	5.608	4.6415	1.2204	1.9326	0.9363	1.3658	0.9233	1.151	0.9336	1.0472	0.9216	0.9765	0.8988	0.9284	0.8727
gt;MAE58900 hypothetical protein	187	1516	14.9812	13.6895	5.2212	5.2795	3.3609	3.247	2.5827	2.4496	2.1553	2.0489	1.8913	1.8093	1.7129	1.6485	1.5855
gt;MAE10440 transposase	171	1516	18.6745	15.4931	6.6776	5.4035	3.6211	3.0204	2.4293	2.1238	1.8633	1.6996	1.5621	1.4656	1.3879	1.3261	1.2773
gt;MAE41890 hypothetical protein	63	1514	1.7699	1.9262	0.9564	1.0633	1.006	1.0322	1.0289	1.0342	1.0343	1.0344	1.0344	1.0344	1.0344	1.0344	1.0344
gt;MAE21840 unknown protein	84	1514	3.6472	3.6656	1.3233	1.2974	1.0704	1.0569	1.0276	1.0267	1.026	1.0294	1.0341	1.042	1.0487	1.0554	1.066
gt;MAE15490 transposase	85	1514	4.6798	3.5368	1.3805	1.2071	1.0491	1.0235	1.0104	1.0081	1.0067	1.0079	1.0087	1.0107	1.0122	1.0144	1.0155
gt;MAE43500 hypothetical protein	83	1512	4.4739	3.9911	1.459	1.3237	1.087	1.0563	1.0253	1.0242	1.0181	1.0207	1.0208	1.0239	1.025	1.0292	1.0299
gt;MAE08590 hypothetical protein	163	1512	12.3185	11.1626	3.7069	3.2579	1.9416	1.731	1.3819	1.2884	1.1733	1.1299	1.091	1.075	1.0594	1.0508	1.0445
gt;MAE13610 hypothetical protein	173	1510	15.7094	13.4007	5.1809	4.3488	2.7615	2.3794	1.8954	1.7053	1.5162	1.4152	1.328	1.271	1.2229	1.1894	1.16
gt;MAE24700 transposase	167	1510	17.8173	13.537	5.6403	4.2024	2.7148	2.1939	1.7374	1.5212	1.3498	1.256	1.1816	1.138	1.1045	1.0815	1.0658
gt;MAE18410 ferredoxin--nitrite reductase	246	1510	30.4951	28.3625	13.3392	12.3907	8.7508	8.0734	6.7162	6.221	5.5625	5.2024	4.8127	4.5431	4.2849	4.0834	3.8905
gt;MAE04790 transposase	277	1510	35.961	34.8319	16.7576	15.3165	10.9252	9.8202	8.124	7.3646	6.5053	5.981	5.4712	5.0951	4.7543	4.4764	4.2296
gt;MAE22850 5-aminolevulinate dehydratase	129	1508	6.4618	5.5345	1.5881	1.8274	1.1064	1.2446	1.0228	1.0803	1	1.024	0.9895	0.9995	0.9872	0.9889	0.986
gt;MAE03380 hypothetical protein	123	1508	7.6689	7.9192	2.3499	2.2246	1.4055	1.3315	1.1472	1.1051	1.0468	1.0263	1.0011	0.9849	0.9719	0.9636	0.9581
gt;MAE39870 type I restriction-modification system	114	1508	9.027	6.4829	2.2945	1.8181	1.2885	1.1634	1.0515	1.0098	0.9783	0.9612	0.9497	0.9444	0.9398	0.9358	0.9316
gt;MAE31640 metallophosphoesterase	127	1508	9.4472	8.7162	3.1714	2.7118	1.8229	1.6277	1.3944	1.3035	1.2216	1.1763	1.1399	1.1138	1.094	1.0783	1.0654
gt;MAE08540 MotA/TolQ/ExbB proton channel family protein	90	1506	2.9725	2.7833	0.9288	1.2644	0.9138	1.0687	0.9353	1.0002	0.935	0.9628	0.9238	0.9375	0.9094	0.9156	0.8929
gt;MAE32100 FAD dependent oxidoreductase	164	1506	13.545	11.8806	3.9892	3.3151	2.0319	1.7594	1.4345	1.3192	1.2159	1.1668	1.13	1.1105	1.0953	1.0871	1.0819
gt;MAE36650 transposase	225	1506	25.3311	23.3957	10.7447	9.8513	6.8562	6.222	5.1127	4.6811	4.1513	3.8568	3.5559	3.3497	3.1568	3.0068	2.87
gt;MAE04060 glycogen debranching enzyme	284	1506	33.1581	32.7266	15.038	14.7727	10.118	9.5156	7.6517	7.1244	6.1867	5.7761	5.2216	4.9061	4.5468	4.303	4.0447
gt;MAE31180 tetratricopeptide repeat protein	112	1504	5.7279	5.5379	1.5975	1.6743	1.1276	1.1575	1.0525	1.071	1.0537	1.0686	1.0684	1.0788	1.0804	1.0877	1.0899
gt;MAE61930 phage shock protein A	103	1504	6.3962	5.5149	1.8841	1.6318	1.1942	1.1189	1.0369	1.0104	0.9854	0.9715	0.9572	0.9455	0.9344	0.9242	0.9125
gt;MAE45500 transposase	99	1504	6.584	4.1347	1.5325	1.3861	1.0835	1.0989	1.046	1.0724	1.0688	1.0922	1.0968	1.1104	1.1164	1.1239	1.1281
gt;MAE49830 modification methylase NgoBI	144	1504	13.4231	9.8305	3.7549	2.9446	1.906	1.6183	1.344	1.2356	1.148	1.1054	1.0739	1.0578	1.0461	1.0405	1.0369
gt;MAE11820 cytochrome c550	69	1502	2.0764	2.1358	0.929	1.1155	0.9818	1.0518	1.0231	1.0551	1.0437	1.058	1.0552	1.0586	1.0587	1.0587	1.0587
gt;MAE11320 hypothetical protein	91	1502	5.0435	3.981	1.4651	1.4497	1.113	1.1245	1.0667	1.0831	1.079	1.0944	1.1032	1.1159	1.1249	1.1324	1.1375
gt;MAE18760 hypothetical protein	114	1502	6.2388	6.5511	1.9926	2.0616	1.3279	1.3305	1.1376	1.1192	1.0513	1.0341	1.0068	0.9955	0.9827	0.9772	0.9703
gt;MAE34620 omega 3 acyl-lipid desaturase	121	1502	8.635	6.1869	2.3413	1.9983	1.3653	1.2846	1.1241	1.1013	1.052	1.0512	1.0322	1.0367	1.0274	1.0355	1.0296
gt;MAE20740 unknown protein	145	1502	14.4276	10.8554	4.3502	3.3557	2.1871	1.8233	1.491	1.3396	1.2208	1.1473	1.0881	1.0472	1.0152	0.9928	0.9732
gt;MAE55580 N-acetylmuramoyl-L-alanine amidase	269	1502	31.4178	30.2768	13.7029	13.3928	8.9892	8.6237	6.835	6.5049	5.6026	5.3241	4.7995	4.5712	4.2341	4.0494	3.8168
gt;MAE60580 hypothetical protein	70	1500	2.6912	2.676	1.1114	1.129	1.0245	1.035	1.0285	1.0362	1.0372	1.0406	1.0411	1.0429	1.0438	1.0446	1.0457
gt;MAE45520 hypothetical protein	82	1500	5.1418	3.7463	1.5025	1.2943	1.0751	1.0225	0.9795	0.9563	0.9396	0.9283	0.9199	0.9144	0.9082	0.9026	0.8986
gt;MAE38500 hypothetical protein	222	1500	25.8163	23.1465	10.6527	9.1697	6.4205	5.5553	4.5702	4.0659	3.5995	3.2919	3.0266	2.8267	2.6514	2.5128	2.39
gt;MAE14360 YhbC family protein	69	1498	2.3848	2.283	0.9666	1.1428	0.9671	1.0297	0.9867	1.0082	0.9943	1.0018	0.9941	0.9998	0.994	0.9994	0.994
gt;MAE57940 hydrogenase subunit of the bidirectional hydrogenase	76	1498	2.8922	2.4477	1.0327	1.1037	1.0061	1.0239	1.0153	1.0236	1.0213	1.0288	1.0286	1.038	1.0385	1.0483	1.0515
gt;MAE42100 hypothetical protein	75	1498	3.3365	3.1191	1.1905	1.1592	1.0214	1.0212	1.0074	1.0132	1.0113	1.0164	1.0158	1.0194	1.0199	1.022	1.0227
gt;MAE30580 hypothetical protein	81	1498	4.5149	3.7352	1.4092	1.2765	1.0656	1.0407	1.0117	1.0034	0.9991	0.9941	0.9912	0.987	0.9846	0.9808	0.9793
gt;MAE01720 virulence factor MviN homolog	187	1498	6.9538	5.093	0.9584	2.4149	0.735	1.7123	0.7755	1.3818	0.8203	1.2053	0.8444	1.102	0.8605	1.036	0.8721
gt;MAE54310 hypothetical protein	163	1498	7.0579	6.5244	1.5294	2.5917	1.0214	1.7759	0.9538	1.4587	0.952	1.297	0.9668	1.2036	0.9827	1.1458	0.9982
gt;MAE08910 putative sensor protein	120	1498	7.6315	5.4306	1.7739	1.6648	1.1202	1.1454	1.0075	1.0192	0.9759	0.9777	0.9601	0.9592	0.9482	0.9467	0.9409
gt;MAE01170 hypothetical protein	164	1498	15.4647	10.6369	3.9178	2.9974	1.8511	1.57	1.2739	1.1785	1.0854	1.0532	1.0146	1.0072	0.9873	0.9883	0.9739
gt;MAE48560 ABC-2 type transport system permease protein	108	1496	4.0821	3.2835	0.9529	1.4419	0.893	1.1635	0.94	1.0835	0.9789	1.0546	1.0058	1.0491	1.0249	1.0496	1.0374
gt;MAE08600 carbon dioxide concentrating mechanism protein CcmO	117	1496	5.6399	5.2385	1.4963	1.5753	1.0617	1.108	0.9877	0.9978	0.9584	0.9591	0.943	0.9412	0.9296	0.9265	0.9194
gt;MAE58840 hypothetical protein	102	1496	7.126	5.9592	2.1349	1.803	1.3216	1.2245	1.1267	1.0959	1.0742	1.0667	1.062	1.062	1.0635	1.0659	1.0694
gt;MAE44410 Psb29 Photosystem II sub-stoichiometric subunit	117	1496	8.0802	6.7819	2.2141	1.8462	1.2739	1.1738	1.0621	1.0271	0.9957	0.9802	0.9637	0.9502	0.9374	0.9231	0.9111
gt;MAE59490 probable glycosyl transferase	135	1496	8.4184	7.4632	2.3495	2.2919	1.4429	1.3793	1.1646	1.1239	1.0567	1.0364	1.0103	0.9965	0.9849	0.9755	0.9685
gt;MAE57400 50S ribosomal protein L2	138	1496	14.7089	11.0772	4.8121	3.4902	2.3598	1.8755	1.5366	1.3442	1.2084	1.1204	1.0616	1.023	0.9939	0.9756	0.9615
gt;MAE19610 adenylosuccinate synthetase	190	1496	17.6445	15.7757	6.015	5.4154	3.3443	2.9752	2.2966	2.0714	1.7865	1.6474	1.5084	1.4173	1.3365	1.2803	1.2307
gt;MAE43560 transposase	178	1496	18.8812	16.6323	6.4268	5.0592	3.1072	2.4949	1.9168	1.6498	1.4388	1.3151	1.2274	1.1724	1.1312	1.1052	1.0888
gt;MAE62320 bifunctional phosphoribosyl aminoimidazole carboxy formyl formyltransferase/inosinemonophosphate cyclohydrolase	208	1496	19.3777	17.2474	6.4122	6.3421	3.8007	3.666	2.7545	2.6099	2.1985	2.0803	1.8668	1.7712	1.646	1.5735	1.4915
gt;MAE36700 hypothetical protein	128	1494	8.8885	6.2433	2.0784	1.879	1.2533	1.2179	1.0584	1.0361	0.9816	0.9641	0.9405	0.9298	0.9156	0.9083	0.9
gt;MAE38380 Tic22-like protein	92	1492	4.317	3.6502	1.2836	1.2682	1.0401	1.0346	1.0043	1.0015	0.9966	0.9955	0.9942	0.994	0.9929	0.9933	0.9925
gt;MAE49840 hypothetical protein	94	1492	5.0659	3.6669	1.3497	1.2701	1.0502	1.0594	1.0198	1.0386	1.0316	1.0468	1.0507	1.0657	1.0744	1.0875	1.0967
gt;MAE05300 transposase	207	1492	26.8194	25.0697	12.3541	10.9617	7.8417	7.0406	5.8462	5.3626	4.7783	4.4631	4.1279	3.9055	3.6872	3.5262	3.37
gt;MAE12960 sodium/sulfate symporter	162	1490	6.163	5.1652	1.1858	1.9624	0.8914	1.3854	0.8813	1.1769	0.895	1.0734	0.9044	1.0125	0.9054	0.9705	0.9022
gt;MAE22930 cytochrome c oxidase subunit II	133	1490	7.5076	5.9627	1.7529	1.757	1.1265	1.1561	1.0096	1.0187	0.9765	0.9807	0.9625	0.9625	0.9557	0.9544	0.9517
gt;MAE00500 hypothetical protein PatF homolog	152	1490	13.9812	10.1169	3.8168	3.0737	1.8801	1.7004	1.3341	1.29	1.155	1.146	1.0945	1.0964	1.0758	1.0809	1.0754
gt;MAE54130 4-alpha-glucanotransferase (EC 2.4.1.25)	207	1490	19.7506	17.0963	6.625	5.9833	3.6885	3.2337	2.4567	2.1635	1.8311	1.655	1.49	1.3832	1.2921	1.2229	1.1695
gt;MAE26510 transposase	189	1490	22.1102	19.5151	8.4351	6.9281	4.5062	3.7462	2.8877	2.4938	2.107	1.8872	1.6888	1.5599	1.4496	1.3678	1.3009
gt;MAE21670 hypothetical protein	76	1488	2.5814	2.6644	1.0478	1.1447	0.9992	1.0297	1.0124	1.0256	1.0268	1.0354	1.0407	1.0475	1.055	1.0632	1.0695
gt;MAE62680 dihydrodipicolinate synthase	111	1488	6.4821	6.0157	1.9315	1.8599	1.2702	1.2457	1.1083	1.0951	1.0571	1.0527	1.039	1.039	1.0365	1.037	1.0382
gt;MAE10460 transposase	100	1488	7.109	4.8954	1.7371	1.4694	1.1287	1.0854	1.0322	1.0296	1.019	1.0221	1.0186	1.0221	1.0207	1.0226	1.0215
gt;MAE28780 hypothetical protein	127	1488	10.8327	9.5555	3.4376	2.7513	1.7921	1.5351	1.305	1.206	1.1351	1.0983	1.0721	1.0582	1.0474	1.04	1.0349
gt;MAE36050 hypothetical protein	110	1486	5.29	4.4251	1.4086	1.4305	1.0654	1.0711	0.9994	0.9995	0.9785	0.9764	0.9669	0.9634	0.9535	0.9495	0.9421
gt;MAE17720 lipoate-protein ligase B	102	1486	6.2934	5.1497	1.6055	1.4909	1.0959	1.0726	1.0046	0.9965	0.98	0.9761	0.9684	0.9621	0.9571	0.9532	0.9487
gt;MAE26530 transposase	145	1486	13.4868	10.2014	3.9294	3.1453	2.0582	1.7578	1.445	1.3107	1.1933	1.1322	1.0842	1.0563	1.0337	1.0181	1.0075
gt;MAE11690 transposase	142	1486	13.492	11.1793	4.3572	3.5163	2.279	1.9254	1.5771	1.4249	1.2979	1.2295	1.1758	1.1421	1.1167	1.0993	1.0876
gt;MAE06090 porin type major outer membrane protein	211	1486	22.1079	21.3064	8.8037	8.1654	5.2553	4.7488	3.6954	3.3411	2.853	2.6118	2.3428	2.1759	2.0105	1.8898	1.7772
gt;MAE23050 ribosomal large subunit pseudouridine synthase D	241	1486	30.6253	29.6973	14.2072	12.8963	9.2143	8.2061	6.8293	6.156	5.4663	5.0146	4.605	4.2899	4.0134	3.7842	3.5834
gt;MAE62260 transposase	58	1484	1.8499	1.8612	1.012	1.0419	1.0042	1.0176	1.0168	1.0223	1.027	1.0302	1.0352	1.0395	1.0436	1.0474	1.0509
gt;MAE09570 UDP-N-acetylmuramoylalanine--D-glutamate ligase	176	1484	12.3493	12.1137	3.7617	3.7899	2.1321	2.07	1.559	1.4953	1.2979	1.2498	1.1573	1.1196	1.07	1.0439	1.0118
gt;MAE06840 methionine aminopeptidase	149	1484	16.9655	12.6854	5.4005	4.0674	2.6985	2.1816	1.7586	1.534	1.3602	1.2526	1.1724	1.115	1.0703	1.0354	1.0055
gt;MAE01820 enoyl-[acyl-carrier-protein] reductase	108	1482	9.205	6.0795	2.2834	1.7565	1.2797	1.1748	1.0874	1.0713	1.0582	1.0621	1.0668	1.0747	1.0815	1.087	1.0928
gt;MAE11330 unknown protein	67	1480	2.3972	2.3767	0.9965	1.1007	0.9783	0.9994	0.9741	0.9778	0.9633	0.9653	0.952	0.9475	0.9346	0.9281	0.9121
gt;MAE45950 amidase	150	1480	7.4541	7.7882	2.041	2.4974	1.3779	1.4767	1.1644	1.1819	1.0806	1.0817	1.0458	1.0473	1.0341	1.0354	1.029
gt;MAE07110 hypothetical protein	120	1480	8.5252	6.914	2.2785	1.8567	1.2884	1.1692	1.0623	1.0274	0.9994	0.9824	0.9704	0.9559	0.9452	0.9358	0.9255
gt;MAE42250 two-component sensor histidine kinase	158	1480	12.8718	9.2731	3.2684	2.971	1.7378	1.728	1.2876	1.3101	1.1128	1.1287	1.032	1.0389	0.9892	0.9928	0.9647
gt;MAE30780 hypothetical protein	121	1478	7.1546	5.9269	1.7423	1.8265	1.1044	1.2308	1.0082	1.0781	0.9917	1.0267	0.9887	1.0078	0.9899	1.0003	0.989
gt;MAE62070 transcriptional regulator	128	1478	8.3837	7.1203	2.1789	2.0167	1.3059	1.2575	1.1003	1.0793	1.0343	1.0261	1.0112	1.0051	0.9966	0.9921	0.9868
gt;MAE24010 transposase	142	1478	14.3928	11.9514	4.8993	3.9365	2.6194	2.2369	1.8286	1.6547	1.4861	1.3936	1.3106	1.2606	1.216	1.1861	1.1604
gt;MAE62730 ATP-dependent Clp protease ATPase subunit	184	1478	16.4062	15.0577	5.688	5.2163	3.1474	2.8904	2.1745	2.0236	1.7139	1.6156	1.4705	1.4086	1.3334	1.2924	1.2503
gt;MAE58580 hypothetical protein	162	1478	16.642	11.9049	4.7335	3.4209	2.2016	1.771	1.4512	1.3016	1.2	1.1449	1.1116	1.0931	1.0827	1.0801	1.0798
gt;MAE16730 hypothetical protein	78	1476	3.2598	2.9959	1.1913	1.1701	1.0309	1.036	1.0222	1.0289	1.0262	1.0291	1.0272	1.0292	1.0272	1.0292	1.0272
gt;MAE58740 phospholipid/glycerol acyltransferase	90	1476	3.7503	3.4898	1.1286	1.317	1.0081	1.0712	1.0103	1.033	1.0217	1.0309	1.0321	1.0385	1.0413	1.0466	1.0524
gt;MAE59500 probable 3-demethylubiquinone-9 3-O-methyltransferase	95	1476	4.0693	3.841	1.2336	1.3114	1.0326	1.0706	1.0308	1.0552	1.0518	1.0721	1.0764	1.0886	1.094	1.0984	1.102
gt;MAE37480 two-component hybrid sensor and regulator	160	1476	13.4459	11.4864	4.1537	3.4456	2.1756	1.8802	1.5216	1.3908	1.2638	1.1992	1.1467	1.1169	1.0922	1.0782	1.0657
gt;MAE58550 hypothetical protein	155	1476	15.8587	10.8339	4.3229	3.1024	2.0227	1.6463	1.3699	1.2458	1.162	1.121	1.0978	1.0837	1.0799	1.0775	1.0782
gt;MAE51050 transposase	177	1476	21.2858	19.1168	8.8761	7.3257	5.0284	4.2264	3.3764	2.9437	2.5376	2.2809	2.0534	1.8934	1.7553	1.6493	1.5597
gt;MAE40270 transposase	87	1474	4.4044	3.8004	1.3636	1.2503	1.0406	1.0178	0.9865	0.9766	0.9648	0.9572	0.9474	0.9397	0.9302	0.9202	0.908
gt;MAE62860 transposase	120	1474	7.8123	7.6065	2.4055	2.1929	1.4213	1.3161	1.1376	1.089	1.0356	1.015	0.9939	0.9814	0.9732	0.9671	0.9614
gt;MAE05060 type I site-specific deoxyribonuclease	166	1474	15.2555	13.3328	5.1006	4.5181	2.8763	2.5311	2.0149	1.8118	1.6055	1.4911	1.3923	1.3292	1.2786	1.2418	1.2111
gt;MAE45730 phospholipid/glycerol acyltransferase	205	1474	21.5366	17.9905	8.0151	7.011	4.678	4.2354	3.3374	3.1042	2.6614	2.5136	2.26	2.1546	1.9963	1.9128	1.8069
gt;MAE52800 thioredoxin reductase	195	1474	21.7108	18.5886	8.6159	7.3045	5.0034	4.3381	3.4994	3.1244	2.7391	2.5117	2.2984	2.1549	2.024	1.9261	1.8401
gt;MAE24990 GTP-binding protein	241	1474	28.877	27.1774	13.0116	11.6812	8.1064	7.3735	5.9109	5.4823	4.724	4.4502	3.999	3.8079	3.5168	3.3716	3.1678
gt;MAE13410 probable peptidase	151	1472	10.492	8.3483	2.6338	2.5067	1.4846	1.4603	1.1786	1.1672	1.076	1.0726	1.0359	1.0399	1.0225	1.0285	1.0214
gt;MAE39620 hypothetical protein	131	1472	11.5223	8.6176	3.1331	2.6793	1.678	1.5399	1.2638	1.2142	1.1211	1.1041	1.0725	1.0686	1.0595	1.0605	1.0622
gt;MAE36360 transposase	142	1472	12.3659	11.314	4.0812	3.3613	2.127	1.8386	1.4973	1.3753	1.2535	1.1944	1.1424	1.1124	1.0878	1.0712	1.0579
gt;MAE27640 transposase	194	1472	22.5497	20.3278	9.3024	7.8449	5.3982	4.5733	3.6891	3.2143	2.7915	2.5082	2.2666	2.0874	1.9383	1.8192	1.7182
gt;MAE14170 hypothetical protein	200	1472	24.8071	22.7962	11.1699	10.0905	7.2446	6.5765	5.4832	5.0419	4.5008	4.1962	3.8779	3.6546	3.4414	3.2752	3.1196
gt;MAE58930 similar to fibronectin binding protein	250	1472	30.2655	29.9426	14.3859	13.5579	9.5335	8.8423	7.2108	6.7121	5.8695	5.4966	4.9938	4.7098	4.3777	4.155	3.9154
gt;MAE06460 ABC-transporter ATP-binding protein	96	1470	4.3666	4.2896	1.3806	1.3776	1.0795	1.0835	1.0477	1.0564	1.0575	1.0689	1.0777	1.0869	1.0985	1.1064	1.1166
gt;MAE17660 hypothetical protein	149	1470	14.3852	11.3817	4.5331	3.5953	2.34	1.9583	1.5838	1.4135	1.2721	1.1954	1.1354	1.0991	1.0719	1.0549	1.0413
gt;MAE42320 hypothetical protein	152	1468	16.9055	12.9996	5.3464	4.0632	2.6173	2.1267	1.6999	1.4952	1.3358	1.2466	1.1805	1.1388	1.1085	1.0897	1.0749
gt;MAE46600 hypothetical protein	76	1466	3.5829	3.1712	1.2002	1.1705	1.0174	1.0085	0.986	0.9813	0.9734	0.9689	0.9636	0.9616	0.9578	0.9542	0.9524
gt;MAE22670 transposase	99	1466	5.4628	4.1044	1.4085	1.3499	1.0552	1.0837	1.0374	1.058	1.0535	1.0663	1.0682	1.0762	1.0783	1.0816	1.0823
gt;MAE54180 unknown protein	115	1464	7.9887	6.5286	2.2263	1.8593	1.289	1.2081	1.0888	1.0714	1.0407	1.0392	1.0345	1.0367	1.0382	1.0407	1.0426
gt;MAE02650 hypothetical protein	222	1464	26.96	24.5913	11.7713	9.9818	7.0548	6.0675	4.9638	4.396	3.8498	3.4934	3.1748	2.9385	2.7297	2.5607	2.4158
gt;MAE14730 outer membrane efflux protein	231	1464	28.9342	27.0591	12.5083	11.3814	7.8167	7.0685	5.7171	5.2195	4.5591	4.2098	3.8261	3.5718	3.319	3.1267	2.9457
gt;MAE36790 hypothetical protein	120	1462	7.7322	6.46	1.9321	1.805	1.1973	1.1701	1.0552	1.051	1.026	1.0294	1.0234	1.0248	1.0235	1.024	1.024
gt;MAE24880 tocopherol O-methyltransferase	118	1462	8.2484	7.1683	2.3271	2.0895	1.3637	1.2803	1.1138	1.0837	1.04	1.0287	1.0163	1.0122	1.0088	1.0079	1.0072
gt;MAE44460 transposase	198	1462	24.5237	21.2583	10.4507	8.6853	6.3253	5.4123	4.5549	4.0478	3.6262	3.3189	3.0648	2.8682	2.6996	2.5595	2.4421
gt;MAE41840 putative colanic acid biosynthesis acetyltransferase wcaF	84	1460	3.2259	3.1038	1.11	1.1998	1.0118	1.0599	1.0346	1.0629	1.0617	1.0788	1.0803	1.0889	1.0897	1.0925	1.0927
gt;MAE02990 hypothetical protein	96	1460	5.4598	4.2791	1.4705	1.3573	1.0874	1.0751	1.0448	1.0544	1.0528	1.0587	1.0601	1.063	1.0629	1.0637	1.0639
gt;MAE18310 phosphate-binding periplasmic protein	122	1460	7.3201	5.4489	1.7355	1.7308	1.1179	1.1832	1.0156	1.055	1.0019	1.0243	1.0029	1.0151	1.0069	1.0147	1.0077
gt;MAE00370 hypothetical protein	137	1460	9.4677	8.4643	2.426	2.4668	1.3909	1.4331	1.1347	1.1389	1.0376	1.0279	0.9862	0.9793	0.96	0.9558	0.945
gt;MAE32470 fructose-bisphosphate aldolase class II	159	1460	12.437	11.9656	4.0092	3.8635	2.2444	2.1513	1.6315	1.5687	1.3589	1.3162	1.2274	1.1994	1.1562	1.1417	1.1218
gt;MAE00040 uncharacterized AIPM/Hcit synthase family transferase (EC 2.3.3.-)	232	1460	23.7457	22.1291	8.8519	8.426	5.3109	4.8752	3.7335	3.4	2.8676	2.6315	2.3417	2.1724	1.9968	1.8754	1.7568
gt;MAE52320 phosphoglucomutase	235	1460	27.0992	25.7488	11.7438	10.6399	7.3332	6.5165	5.2893	4.755	4.1658	3.8098	3.4714	3.2281	3.0094	2.8383	2.6859
gt;MAE37270 aspartyl-tRNA synthetase	269	1460	34.5668	33.6275	16.165	14.7982	10.5323	9.4722	7.8293	7.1026	6.2784	5.7778	5.2899	4.9381	4.6124	4.354	4.126
gt;MAE27690 hypothetical protein	124	1458	8.6759	8.3069	2.6554	2.4517	1.5498	1.4418	1.2211	1.1775	1.1146	1.0982	1.0813	1.0796	1.0779	1.0792	1.0809
gt;MAE56620 transposase	142	1458	12.7042	11.1283	4.0793	3.2447	2.0526	1.7361	1.4182	1.2919	1.1833	1.1289	1.084	1.0613	1.0423	1.0307	1.0203
gt;MAE18470 hypothetical protein	72	1456	2.8561	2.7527	1.0643	1.1469	0.9917	1.0111	0.9833	0.9882	0.975	0.9733	0.9638	0.9578	0.9503	0.9436	0.9368
gt;MAE13240 hypothetical protein	77	1456	3.3219	2.7988	1.1317	1.1457	1.0031	1.0062	0.983	0.9785	0.9688	0.9613	0.9539	0.9462	0.9384	0.9287	0.9156
gt;MAE62780 putative peroxiredoxin	104	1456	6.4222	5.0203	1.6584	1.531	1.1121	1.1169	1.0461	1.0614	1.0513	1.0687	1.0732	1.0895	1.0986	1.1109	1.1186
gt;MAE13660 curli production assembly/transport component CsgG	135	1456	9.2124	8.8865	2.863	2.6592	1.6533	1.5397	1.2841	1.2271	1.1487	1.1282	1.1031	1.0966	1.0899	1.0912	1.0936
gt;MAE33890 putative proteasome-type protease	121	1456	10.1548	7.3654	2.5805	2.1741	1.4407	1.3139	1.1366	1.0865	1.0361	1.0134	0.9957	0.985	0.9765	0.9718	0.9702
gt;MAE57120 cobyric acid synthase	208	1456	20.469	16.9595	7.2246	6.2827	4.0709	3.6665	2.8503	2.6448	2.2593	2.1411	1.9302	1.8494	1.726	1.6677	1.5846
gt;MAE19950 heat shock protein DnaJ-like	192	1456	25.8485	23.2398	11.8476	9.9786	7.306	6.3178	5.2979	4.7442	4.2364	3.895	3.6018	3.3793	3.1877	3.0326	2.9002
gt;MAE11870 ATP-dependent protease ClpP	97	1454	5.6174	4.4852	1.6154	1.3961	1.1069	1.0474	0.9975	0.98	0.963	0.9539	0.9428	0.9381	0.9358	0.934	0.9336
gt;MAE52100 hypothetical protein	153	1454	12.1714	9.8766	3.2862	2.7646	1.7097	1.5327	1.2632	1.1993	1.112	1.0813	1.0488	1.0348	1.0166	1.0084	0.9979
gt;MAE33690 putative modulator of DNA gyrase	183	1454	16.4825	14.3847	5.3725	5.0478	3.0155	2.8331	2.1131	1.9925	1.6798	1.6012	1.4456	1.3902	1.3062	1.2681	1.2214
gt;MAE22610 mercuric reductase	230	1454	25.992	24.1286	10.9491	10.3065	6.9861	6.5326	5.2246	4.9014	4.2481	4.0118	3.6349	3.4515	3.2122	3.0713	2.902
gt;MAE39300 hypothetical protein	114	1452	7.0605	5.9397	1.9122	1.7924	1.2154	1.18	1.0538	1.0415	1.0081	1.0029	0.9908	0.9889	0.9852	0.9844	0.9823
gt;MAE43300 transposase	114	1452	8.2052	6.9383	2.2985	2.023	1.3321	1.2564	1.097	1.0656	1.0158	0.9926	0.9679	0.9511	0.9349	0.9215	0.9116
gt;MAE21230 ABC-transporter DevC family protein	150	1452	9.4522	9.3768	2.9158	2.9967	1.7571	1.7448	1.3739	1.333	1.1913	1.1588	1.0957	1.0733	1.0393	1.0246	1.0051
gt;MAE48690 transposase	173	1452	19.3276	15.5214	6.6967	5.2035	3.4024	2.762	2.165	1.8733	1.621	1.4785	1.3652	1.2961	1.2401	1.2055	1.1794
gt;MAE35780 hypothetical protein	95	1450	5.183	4.2166	1.4502	1.4047	1.0698	1.0522	0.9802	0.9678	0.946	0.9417	0.9305	0.9265	0.9233	0.9197	0.9156
gt;MAE44610 two-component hybrid sensor and regulator	167	1450	16.0794	12.5652	4.9446	4.1747	2.5804	2.2984	1.7675	1.6386	1.4184	1.3504	1.2454	1.2078	1.1569	1.133	1.1069
gt;MAE33130 hypothetical protein	259	1450	28.5194	27.9367	12.7388	12.1903	8.2674	7.6527	6.1159	5.6271	4.8745	4.5146	4.0846	3.817	3.5446	3.3454	3.1568
gt;MAE28540 hypothetical protein	57	1448	1.7317	1.7929	0.9852	1.039	0.9943	1.0056	0.9935	1.0012	0.992	0.9979	0.9907	0.9951	0.9896	0.9937	0.9882
gt;MAE37840 menaquinone biosynthesis methyltransferase UbiE	108	1448	7.4431	5.7176	2.0593	1.7629	1.2724	1.1949	1.1006	1.0796	1.0583	1.0551	1.0499	1.0503	1.0469	1.0492	1.046
gt;MAE56440 NADH dehydrogenase subunit I	103	1448	9.9275	7.3804	3.2684	2.4579	1.7825	1.5116	1.328	1.2349	1.1744	1.1384	1.1152	1.103	1.0935	1.0886	1.0856
gt;MAE06690 tRNA(Ile)-lysidine synthase	150	1448	12.6221	10.5227	3.6491	2.9417	1.7848	1.5615	1.2728	1.197	1.1098	1.0826	1.0534	1.045	1.0358	1.0337	1.0337
gt;MAE41600 peptidase S15	221	1448	21.4447	20.4348	8.2038	8.7997	5.3868	5.6575	4.206	4.2883	3.5474	3.5408	3.1236	3.0802	2.8272	2.7738	2.6094
gt;MAE29230 transposase	181	1448	22.5422	20.2503	9.7243	8.1276	5.7934	4.9823	4.1338	3.6924	3.2848	3.0201	2.7868	2.6112	2.4595	2.3347	2.2272
gt;MAE62000 leucine aminopeptidase	205	1446	19.6103	16.8477	6.6484	6.5231	3.9248	3.9137	2.8357	2.82	2.266	2.2415	1.9209	1.889	1.6895	1.654	1.523
gt;MAE47650 transposase	198	1446	23.514	20.2458	9.5237	7.7766	5.4874	4.6162	3.7929	3.3174	2.9152	2.6305	2.3967	2.2113	2.0618	1.9362	1.8256
gt;MAE46330 unknown protein	66	1444	1.6981	1.8281	0.8597	1.1138	0.9612	1.0472	1.0146	1.0498	1.0524	1.0751	1.0854	1.1024	1.1143	1.1299	1.1416
gt;MAE44430 hypothetical protein	74	1444	2.5089	2.7277	1.0655	1.1745	1.0066	1.0516	1.0222	1.0434	1.0348	1.0456	1.0408	1.0471	1.0457	1.0483	1.0478
gt;MAE06710 ion transport protein	100	1444	3.3394	3.0906	0.8831	1.3899	0.8797	1.145	0.9364	1.0729	0.973	1.0476	0.9975	1.0431	1.0155	1.0414	1.0281
gt;MAE57300 30S ribosomal protein S8	72	1444	3.45	3.005	1.2303	1.1573	1.0261	1.0144	0.9971	0.9941	0.9855	0.984	0.975	0.9737	0.9658	0.9625	0.9581
gt;MAE27890 uncharacterized MFS-type transporter	110	1444	4.0989	4.1347	1.0943	1.5148	0.9674	1.1549	0.9781	1.0644	0.9935	1.0319	1.0009	1.0177	1.0042	1.0114	1.0038
gt;MAE00530 hypothetical protein	78	1444	4.13	3.413	1.3329	1.2047	1.0431	1.0256	1.0082	1.0074	1.0046	1.0049	1.0038	1.0043	1.004	1.0055	1.0059
gt;MAE01070 hypothetical protein	149	1444	14.8212	10.0165	3.7772	2.7614	1.7887	1.4973	1.2658	1.1762	1.115	1.0862	1.0738	1.0687	1.0674	1.0709	1.0759
gt;MAE01560 transposase	198	1444	23.5926	20.3298	9.5752	7.9239	5.6173	4.77	3.9427	3.4705	3.068	2.7808	2.5409	2.3539	2.1968	2.0679	1.9561
gt;MAE12310 oligopeptidase A	285	1444	36.9368	37.5137	18.3492	17.2057	12.4522	11.3822	9.5235	8.7314	7.7864	7.2161	6.6361	6.214	5.817	5.496	5.2025
[truncated: 4,312 more rows]
