# Supplementary material for: Exploring the Adenylation Domain Repertoire of Nonribosomal Peptide Synthetases Using an Ensemble of Sequence-Search Methods
Source: PLoS One. 2013 Jul 16;8(7):e65926. doi: 10.1371/journal.pone.0065926 (PMC3712989; doi:10.1371/journal.pone.0065926)
Supplement: File S12 — IDs, training and prediction series, values of the TIs for A and CATH domains. (XLS) [file pone.0065926.s012.xls]

## Sheet: A_domains_&_CATH_domains
ID	Domain Class	Series	fcµ0	fcµ1	fcµ2	fcµ3	fcµ4	fcµ5	fcµ6	fcµ7	fcµ8	fcµ9	fcµ10	fcµ11	fcµ12	fcµ13	fcµ14	fcµ15	fcµ16
gi|7228478|gb|AAF42473.1|AF204401_1 actinomycin synthetase III [Streptomyces chrysomallus](1499 2010)	A-d	train	216	3938	6.3943	6.8805	1.3039	2.2598	0.9028	1.4946	0.8792	1.2476	0.915	1.1493	0.9566	1.1068	0.9825	1.0785	0.9885
gi|3118|emb|CAA38195.1| ACV synthetase (AA 1 - 3746) [Penicillium chrysogenum](270 811)	A-d	train	238	4792	9.7432	8.9279	2.1139	2.1329	1.2694	1.3328	1.1392	1.1914	1.1391	1.1841	1.172	1.2084	1.2109	1.2362	1.2442
gi|3118|emb|CAA38195.1| ACV synthetase (AA 1 - 3746) [Penicillium chrysogenum](1359 1897)	A-d	train	239	5612	8.2681	8.4857	1.9717	1.9832	1.2886	1.3085	1.1926	1.2191	1.2089	1.2366	1.2534	1.2759	1.2909	1.3044	1.3151
gi|3118|emb|CAA38195.1| ACV synthetase (AA 1 - 3746) [Penicillium chrysogenum](2460 2989)	A-d	train	209	5698	5.3926	6.6003	1.4784	1.9257	1.174	1.355	1.1633	1.2324	1.1846	1.2288	1.2265	1.2598	1.2717	1.2991	1.3152
gi|16080251|ref|NP_391078.1| 2,3-dihydroxybenzoate-AMP ligase (enterobactin synthetase component E) [Bacillus subtilis](1 531)	A-d	train	219	6300	6.2707	6.5291	1.511	1.838	1.1412	1.2941	1.1039	1.1898	1.1209	1.1763	1.1495	1.1841	1.178	1.2024	1.2016
gi|5919203|gb|AAD56240.1|AF184977_1 DhbF [Bacillus subtilis](437 955)	A-d	train	214	6806	4.837	5.438	1.2441	1.7163	1.0591	1.2591	1.0295	1.1168	0.9795	0.9914	0.9092	0.8864	0.8184	0.7735	0.703
gi|5919203|gb|AAD56240.1|AF184977_1 DhbF [Bacillus subtilis](1493 2029)	A-d	train	221	7316	5.5286	5.6957	1.3746	1.8031	1.1044	1.2686	1.0115	1.0367	0.8872	0.8435	0.7214	0.6542	0.5578	0.4841	0.398
gi|16080251|ref|NP_391078.1| 2,3-dihydroxybenzoate-AMP ligase (enterobactin synthetase component E) [Bacillus subtilis](1 531)	A-d	train	219	7332	5.0284	5.6275	1.3587	1.7298	1.1242	1.2625	1.0471	1.0848	0.9639	0.9574	0.8821	0.8509	0.7842	0.7485	0.6741
gi|5919203|gb|AAD56240.1|AF184977_1 DhbF [Bacillus subtilis](437 955)	A-d	train	214	7270	4.4581	5.1603	1.225	1.6885	1.0699	1.2381	1.0059	1.042	0.8955	0.8639	0.7549	0.6844	0.5889	0.5185	0.4213
gi|5919203|gb|AAD56240.1|AF184977_1 DhbF [Bacillus subtilis](1493 2029)	A-d	train	221	7316	5.5286	5.6957	1.3746	1.8031	1.1044	1.2686	1.0115	1.0367	0.8872	0.8435	0.7214	0.6542	0.5578	0.4841	0.398
gi|5915760|sp|O68006|BACA_BACLI Bacitracin synthetase 1 (BA1) [Includes: ATP-dependent isoleucine adenylase (IleA) (Isoleucine activase); ATP-dependent cysteine adenylase (CysA) (Cysteine activase); ATP-dependent leucine adenylase (LeuA) (Leucine activas	A-d	train	247	8122	7.9006	6.5449	1.5504	1.7254	1.1117	1.1902	0.9681	0.9379	0.8036	0.725	0.6085	0.5316	0.4467	0.3855	0.315
gi|5915760|sp|O68006|BACA_BACLI Bacitracin synthetase 1 (BA1) [Includes: ATP-dependent isoleucine adenylase (IleA) (Isoleucine activase); ATP-dependent cysteine adenylase (CysA) (Cysteine activase); ATP-dependent leucine adenylase (LeuA) (Leucine activas	A-d	train	234	8578	5.6948	5.6206	1.4528	1.6384	1.1847	1.2528	1.1083	1.1098	1.0198	0.98	0.8998	0.8392	0.7607	0.6863	0.6203
gi|5915760|sp|O68006|BACA_BACLI Bacitracin synthetase 1 (BA1) [Includes: ATP-dependent isoleucine adenylase (IleA) (Isoleucine activase); ATP-dependent cysteine adenylase (CysA) (Cysteine activase); ATP-dependent leucine adenylase (LeuA) (Leucine activas	A-d	train	240	9240	5.8426	5.6206	1.4358	1.6199	1.1489	1.1997	1.0037	0.9501	0.8332	0.741	0.6334	0.5424	0.4571	0.3948	0.3526
gi|5915760|sp|O68006|BACA_BACLI Bacitracin synthetase 1 (BA1) [Includes: ATP-dependent isoleucine adenylase (IleA) (Isoleucine activase); ATP-dependent cysteine adenylase (CysA) (Cysteine activase); ATP-dependent leucine adenylase (LeuA) (Leucine activas	A-d	train	273	10244	9.3604	6.4397	1.5096	1.5021	0.9078	0.8434	0.6173	0.5074	0.3158	0.2089	0.1049	0.0586	0.0112	0.0007	0
gi|5915760|sp|O68006|BACA_BACLI Bacitracin synthetase 1 (BA1) [Includes: ATP-dependent isoleucine adenylase (IleA) (Isoleucine activase); ATP-dependent cysteine adenylase (CysA) (Cysteine activase); ATP-dependent leucine adenylase (LeuA) (Leucine activas	A-d	train	243	10598	4.6788	4.8912	1.1938	1.3734	0.8488	0.789	0.5247	0.403	0.237	0.1657	0.0646	0.0292	0.0006	0	0
gi|5915761|sp|O68007|BACB_BACLI Bacitracin synthetase 2 (BA2) [Includes: ATP-dependent lysine adenylase (LysA) (Lysine activase); ATP-dependent D-ornithine adenylase (D-OrnA) (D-ornithine activase); Ornithine racemase ](498 1008)	A-d	train	244	11232	4.7474	4.7702	1.1778	1.2892	0.7651	0.6666	0.4301	0.2932	0.1509	0.0751	0.0137	0.0001	0	0	0
gi|5915761|sp|O68007|BACB_BACLI Bacitracin synthetase 2 (BA2) [Includes: ATP-dependent lysine adenylase (LysA) (Lysine activase); ATP-dependent D-ornithine adenylase (D-OrnA) (D-ornithine activase); Ornithine racemase ](1529 2051)	A-d	train	242	11702	4.0716	4.4408	1.1407	1.2379	0.7627	0.6669	0.4285	0.304	0.1426	0.0667	0.0154	0.0019	0	0	0
gi|5915762|sp|O68008|BACC_BACLI Bacitracin synthetase 3 (BA3) [Includes: ATP-dependent isoleucine adenylase (IleA) (Isoleucine activase); ATP-dependent D-phenylalanine adenylase (D-PheA) (D-phenylalanine activase); ATP-dependent histidine adenylase (HisA	A-d	train	245	12092	4.2768	4.4079	1.1156	1.1769	0.6876	0.5662	0.3212	0.2494	0.1023	0.0477	0.0012	0	0	0	0
gi|5915762|sp|O68008|BACC_BACLI Bacitracin synthetase 3 (BA3) [Includes: ATP-dependent isoleucine adenylase (IleA) (Isoleucine activase); ATP-dependent D-phenylalanine adenylase (D-PheA) (D-phenylalanine activase); ATP-dependent histidine adenylase (HisA	A-d	train	216	11266	3.1438	3.8054	1.0349	1.2168	0.73	0.6495	0.4161	0.3118	0.1713	0.1006	0.0302	0.0048	0	0	0
gi|5915762|sp|O68008|BACC_BACLI Bacitracin synthetase 3 (BA3) [Includes: ATP-dependent isoleucine adenylase (IleA) (Isoleucine activase); ATP-dependent D-phenylalanine adenylase (D-PheA) (D-phenylalanine activase); ATP-dependent histidine adenylase (HisA	A-d	train	233	11724	5.441	4.5366	1.2552	1.3396	0.8693	0.7822	0.5113	0.351	0.17	0.098	0.0192	0.0063	0	0	0
gi|5915762|sp|O68008|BACC_BACLI Bacitracin synthetase 3 (BA3) [Includes: ATP-dependent isoleucine adenylase (IleA) (Isoleucine activase); ATP-dependent D-phenylalanine adenylase (D-PheA) (D-phenylalanine activase); ATP-dependent histidine adenylase (HisA	A-d	train	244	12184	5.9828	4.6552	1.236	1.2318	0.7333	0.6011	0.3543	0.251	0.1047	0.0459	0.0106	0.0014	0	0	0
gi|21221664|ref|NP_627443.1| CDA peptide synthetase I [Streptomyces coelicolor A3(2)](449 1081)	A-d	train	232	12490	3.1767	3.6789	0.8432	1.1328	0.4964	0.5885	0.2841	0.3142	0.1139	0.1638	0.0291	0.042	0.0023	0.0111	0
gi|21221664|ref|NP_627443.1| CDA peptide synthetase I [Streptomyces coelicolor A3(2)](1647 2191)	A-d	train	215	12414	2.3799	3.162	0.7871	1.1322	0.4582	0.566	0.2168	0.2956	0.0919	0.1297	0.0313	0.0519	0.0023	0.0156	0.0001
gi|21221664|ref|NP_627443.1| CDA peptide synthetase I [Streptomyces coelicolor A3(2)](2732 3256)	A-d	train	208	12088	2.3607	3.3054	0.8443	1.1536	0.5313	0.6716	0.277	0.3579	0.1072	0.173	0.0278	0.0501	0.0055	0.013	0.0001
gi|21221664|ref|NP_627443.1| CDA peptide synthetase I [Streptomyces coelicolor A3(2)](4256 4753)	A-d	train	220	12440	4.3638	3.8485	1.0746	1.1781	0.6449	0.5362	0.3109	0.2307	0.0914	0.0577	0.0102	0.0072	0	0	0
gi|21221664|ref|NP_627443.1| CDA peptide synthetase I [Streptomyces coelicolor A3(2)](5296 5793)	A-d	train	222	12740	3.6118	3.692	1.0171	1.1504	0.6223	0.5154	0.2782	0.2205	0.0828	0.0457	0.0075	0.0031	0	0	0
gi|21221664|ref|NP_627443.1| CDA peptide synthetase I [Streptomyces coelicolor A3(2)](6335 6875)	A-d	train	198	11896	2.3815	3.1564	0.8025	1.1331	0.5632	0.6829	0.3099	0.368	0.1161	0.1614	0.0134	0.0325	0.0002	0.0059	0
gi|21221665|ref|NP_627444.1| CDA peptide synthetase II [Streptomyces coelicolor A3(2)](445 939)	A-d	train	195	11928	2.3892	3.034	0.8226	1.0884	0.6047	0.6099	0.3304	0.3102	0.1322	0.12	0.0131	0.0103	0	0	0
gi|21221665|ref|NP_627444.1| CDA peptide synthetase II [Streptomyces coelicolor A3(2)](1478 1988)	A-d	train	214	12196	3.8942	3.5635	0.8853	1.1287	0.5496	0.6395	0.2749	0.3193	0.1111	0.1475	0.0072	0.0215	0.0001	0	0
gi|21221665|ref|NP_627444.1| CDA peptide synthetase II [Streptomyces coelicolor A3(2)](2541 3071)	A-d	train	213	12508	3.446	3.3862	0.8606	1.1106	0.5312	0.6158	0.2349	0.2797	0.0758	0.1131	0.0018	0.0089	0	0	0
gi|24426512|emb|CAD55498.1| CDA peptide synthetase III [Streptomyces coelicolor A3(2)](441 969)	A-d	train	209	12780	2.8516	3.1695	0.8808	1.0669	0.588	0.5708	0.2881	0.2709	0.0819	0.0822	0.0037	0.0005	0	0	0
gi|24426512|emb|CAD55498.1| CDA peptide synthetase III [Streptomyces coelicolor A3(2)](1515 2033)	A-d	train	180	10784	1.8792	2.5858	0.6817	1.1343	0.4889	0.7076	0.2895	0.3853	0.158	0.2086	0.0537	0.1015	0.0216	0.0284	0.0007
gi|15029319|gb|AAK81824.1| peptide synthetase [Streptomyces lavendulae](1 483)	A-d	train	210	11190	4.6377	3.6811	0.8472	1.2452	0.5675	0.7336	0.302	0.4156	0.1189	0.1694	0.0339	0.0605	0.006	0.0193	0.0002
gi|15029319|gb|AAK81824.1| peptide synthetase [Streptomyces lavendulae](1023 1528)	A-d	train	194	11380	2.6596	2.8953	0.732	1.0888	0.5131	0.6588	0.255	0.3544	0.1214	0.1571	0.0404	0.0702	0.0045	0.0142	0.0001
gi|15029320|gb|AAK81825.1| peptide synthetase [Streptomyces lavendulae](444 941)	A-d	train	217	11766	4.2265	3.3444	0.7239	1.1273	0.4128	0.6339	0.2287	0.3499	0.1213	0.1731	0.0457	0.0938	0.0027	0.0256	0.0001
gi|15029321|gb|AAK81826.1| peptide synthetase [Streptomyces lavendulae](436 950)	A-d	train	234	12224	5.5447	3.9493	0.8507	1.2189	0.4621	0.6463	0.2129	0.3296	0.0913	0.1432	0.0241	0.0561	0.0008	0.014	0.0001
gi|15029321|gb|AAK81826.1| peptide synthetase [Streptomyces lavendulae](1951 2445)	A-d	train	209	12326	2.9407	3.0402	0.7326	1.0753	0.4677	0.5557	0.2402	0.262	0.1042	0.1508	0.0221	0.0439	0.0004	0.0011	0
gi|15029321|gb|AAK81826.1| peptide synthetase [Streptomyces lavendulae](3456 3950)	A-d	train	199	12410	2.2906	2.7209	0.6696	1.0359	0.4071	0.5205	0.2101	0.2682	0.0961	0.1237	0.027	0.0518	0.0019	0.0207	0.0002
gi|15029322|gb|AAK81827.1| peptide synthetase [Streptomyces lavendulae](436 948)	A-d	train	210	12716	4.0446	3.3378	0.8248	1.0974	0.475	0.5921	0.2181	0.2934	0.0813	0.1183	0.0039	0.0251	0.0003	0	0
gi|440169|emb|CAA82227.1| cyclosporine synthetase [Tolypocladium inflatum](478 1015)	A-d	train	214	12998	3.4107	3.1946	0.815	1.0883	0.5203	0.6207	0.2389	0.2966	0.0665	0.0945	0.0034	0.0053	0.0001	0	0
gi|440169|emb|CAA82227.1| cyclosporine synthetase [Tolypocladium inflatum](1551 2067)	A-d	train	223	13318	4.0321	3.4156	0.8165	1.0452	0.4657	0.5293	0.2196	0.25	0.0698	0.0852	0.007	0.0154	0	0	0
gi|440169|emb|CAA82227.1| cyclosporine synthetase [Tolypocladium inflatum](3047 3560)	A-d	train	206	13406	2.5895	2.9563	0.7934	1.0598	0.4825	0.5634	0.2105	0.2367	0.055	0.0622	0.0022	0.0003	0	0	0
gi|440169|emb|CAA82227.1| cyclosporine synthetase [Tolypocladium inflatum](4534 5046)	A-d	train	215	13670	3.534	3.1079	0.8106	1.0114	0.4423	0.4752	0.2089	0.2133	0.0562	0.0783	0.0016	0.004	0	0	0
gi|440169|emb|CAA82227.1| cyclosporine synthetase [Tolypocladium inflatum](6027 6524)	A-d	train	211	13870	2.9219	2.9772	0.8292	1.0242	0.5219	0.5322	0.2296	0.2383	0.0405	0.0437	0.002	0.0002	0	0	0
gi|440169|emb|CAA82227.1| cyclosporine synthetase [Tolypocladium inflatum](7523 8049)	A-d	train	211	14082	2.627	2.8862	0.7852	0.9919	0.4726	0.4849	0.2278	0.2282	0.0519	0.0535	0.003	0.0001	0	0	0
gi|440169|emb|CAA82227.1| cyclosporine synthetase [Tolypocladium inflatum](8585 9093)	A-d	train	204	14082	2.218	2.6993	0.7203	0.9367	0.4275	0.447	0.1967	0.1852	0.0469	0.0472	0.0019	0.0015	0	0	0
gi|440169|emb|CAA82227.1| cyclosporine synthetase [Tolypocladium inflatum](10087 10593)	A-d	train	219	14350	4.2936	3.2735	0.9022	0.9976	0.4596	0.4728	0.1882	0.1819	0.0231	0.024	0.0003	0.0002	0	0	0
gi|440169|emb|CAA82227.1| cyclosporine synthetase [Tolypocladium inflatum](11553 12113)	A-d	train	217	14556	3.0138	2.934	0.7907	0.9748	0.4196	0.4159	0.1601	0.1466	0.0448	0.0386	0.0015	0.0003	0	0	0
gi|440169|emb|CAA82227.1| cyclosporine synthetase [Tolypocladium inflatum](12646 13158)	A-d	train	212	14706	2.6407	2.7449	0.7738	0.963	0.4366	0.4445	0.1523	0.1513	0.0235	0.0253	0.0002	0.0001	0	0	0
gi|440169|emb|CAA82227.1| cyclosporine synthetase [Tolypocladium inflatum](14154 14683)	A-d	train	210	14830	2.3593	2.6202	0.7065	0.9135	0.3518	0.4116	0.1309	0.1531	0.0201	0.0398	0.0003	0.0003	0	0	0
gi|16080251|ref|NP_391078.1| 2,3-dihydroxybenzoate-AMP ligase (enterobactin synthetase component E) [Bacillus subtilis](8 537)	A-d	train	220	15078	3.6371	3.0993	0.8909	0.9841	0.4301	0.3887	0.129	0.1091	0.0201	0.0176	0.001	0.0001	0	0	0
gi|145843|gb|AAA92015.1| enterobactin(437 964)	A-d	train	198	14542	1.9108	2.4932	0.6938	0.9452	0.3978	0.4729	0.188	0.2207	0.0205	0.0674	0.0005	0	0	0	0
gi|3643187|gb|AAC36721.1| peptide synthetase [Bacillus subtilis](438 957)	A-d	train	235	14998	6.4947	3.8286	1.003	1.0324	0.4616	0.4572	0.1422	0.1584	0.0161	0.025	0	0	0	0	0
gi|3643187|gb|AAC36721.1| peptide synthetase [Bacillus subtilis](1473 2000)	A-d	train	229	15306	4.099	3.1994	0.8925	1.0071	0.5305	0.5594	0.1616	0.189	0.0125	0.0176	0	0	0	0	0
gi|3724089|emb|CAA09819.1| fengycin synthetase [Bacillus subtilis](448 959)	A-d	train	224	15528	3.4765	3.043	0.9043	1.0136	0.5326	0.5119	0.1574	0.1464	0.0065	0.0005	0	0	0	0	0
gi|3724089|emb|CAA09819.1| fengycin synthetase [Bacillus subtilis](1478 1999)	A-d	train	253	16162	6.6809	3.9473	1.0414	0.9975	0.4737	0.3746	0.1147	0.078	0.0015	0.0002	0	0	0	0	0
gi|2522214|gb|AAB80956.1| fengycin synthetase FenE [Bacillus subtilis](441 962)	A-d	train	228	16234	3.1042	2.8805	0.7899	0.8921	0.3829	0.3846	0.1054	0.1204	0.0042	0.0043	0	0	0	0	0
gi|2522214|gb|AAB80956.1| fengycin synthetase FenE [Bacillus subtilis](1480 1996)	A-d	train	230	16486	3.1262	2.9125	0.824	0.8826	0.4557	0.4068	0.1219	0.0882	0.0021	0	0	0	0	0	0
gi|216278|dbj|BAA00406.1| gramicidin S synthetase 1 [Brevibacillus brevis](17 530)	A-d	train	228	16788	2.8221	2.8705	0.8517	0.8756	0.4254	0.3028	0.1003	0.0515	0.0001	0	0	0	0	0	0
gi|39372|emb|CAA43838.1| grsB [Brevibacillus brevis](446 963)	A-d	train	247	17248	5.4163	3.535	0.8967	0.8642	0.3494	0.2886	0.0573	0.0367	0.0017	0.0004	0	0	0	0	0
gi|39372|emb|CAA43838.1| grsB [Brevibacillus brevis](1485 1999)	A-d	train	222	17104	2.4641	2.7239	0.8052	0.8903	0.3747	0.3347	0.0749	0.0587	0.0007	0	0	0	0	0	0
gi|39372|emb|CAA43838.1| grsB [Brevibacillus brevis](2521 3045)	A-d	train	234	17376	3.7784	2.9905	0.8121	0.885	0.3524	0.3671	0.0674	0.0903	0.0012	0.0006	0	0	0	0	0
gi|39372|emb|CAA43838.1| grsB [Brevibacillus brevis](3568 4083)	A-d	train	216	17080	2.2074	2.4587	0.7299	0.8644	0.3565	0.3687	0.0663	0.0819	0.0015	0	0	0	0	0	0
gi|167219|gb|AAA33023.1| HC-toxin synthetase(194 735)	A-d	train	218	17222	2.3999	2.5304	0.7134	0.8665	0.3556	0.3611	0.0806	0.0735	0.001	0	0	0	0	0	0
gi|167219|gb|AAA33023.1| HC-toxin synthetase(1800 2358)	A-d	train	227	17464	3.2065	2.7896	0.7498	0.8659	0.3245	0.3336	0.071	0.081	0.0011	0.0007	0	0	0	0	0
gi|167219|gb|AAA33023.1| HC-toxin synthetase(2948 3520)	A-d	train	249	18006	5.0931	3.2886	0.8353	0.8709	0.3375	0.3091	0.0491	0.0574	0.002	0.0025	0	0	0	0	0
gi|167219|gb|AAA33023.1| HC-toxin synthetase(4112 4649)	A-d	train	217	17860	2.1089	2.3797	0.7412	0.7908	0.3818	0.317	0.0641	0.0336	0.001	0	0	0	0	0	0
gi|3080742|gb|AAD04757.1| lichenysin synthetase A; LicA [Bacillus licheniformis](438 964)	A-d	train	232	18106	4.0675	2.8335	0.7914	0.7964	0.2853	0.2309	0.0382	0.0436	0.0004	0.0003	0	0	0	0	0
gi|3080742|gb|AAD04757.1| lichenysin synthetase A; LicA [Bacillus licheniformis](1484 2003)	A-d	train	229	18282	3.0599	2.5705	0.7068	0.7772	0.2694	0.2703	0.053	0.0899	0.0008	0	0	0	0	0	0
gi|3080742|gb|AAD04757.1| lichenysin synthetase A; LicA [Bacillus licheniformis](2523 3030)	A-d	train	215	18160	2.0336	2.4224	0.7224	0.8422	0.3121	0.31	0.0493	0.0553	0.0006	0.0003	0	0	0	0	0
gi|3080743|gb|AAD04758.1| lichenysin synthetase B; LicB [Bacillus licheniformis](443 955)	A-d	train	218	18328	2.441	2.4666	0.7563	0.7442	0.3297	0.2615	0.0637	0.0406	0.0007	0	0	0	0	0	0
gi|3080743|gb|AAD04758.1| lichenysin synthetase B; LicB [Bacillus licheniformis](1474 2004)	A-d	train	239	18616	4.9499	3.03	0.8527	0.805	0.3038	0.2495	0.0345	0.0277	0	0	0	0	0	0	0
gi|3080743|gb|AAD04758.1| lichenysin synthetase B; LicB [Bacillus licheniformis](2520 3030)	A-d	train	223	18698	2.6584	2.5834	0.7943	0.8276	0.3244	0.2502	0.0284	0.0216	0	0	0	0	0	0	0
gi|3080744|gb|AAD04759.1| lichenysin synthetase C; LicC [Bacillus licheniformis](451 972)	A-d	train	225	18812	2.5665	2.5204	0.7455	0.7815	0.2806	0.2536	0.025	0.0293	0	0	0	0	0	0	0
gi|1835254|emb|CAA67140.1| Pristinamycin I synthetase I [Streptomyces pristinaespiralis](1 582)	A-d	train	243	19242	3.5696	2.7074	0.6042	0.7526	0.1761	0.2965	0.0258	0.0929	0.0004	0.0117	0	0	0	0	0
gi|7522106|pir||T30288 pristinamycin I synthase 2 [imported] - Streptomyces pristinaespiralis(425 941)	A-d	train	180	14340	1.3661	1.8246	0.4877	0.8013	0.2826	0.4608	0.1024	0.2433	0.0271	0.0952	0.0056	0.0261	0.0002	0	0
gi|7522106|pir||T30288 pristinamycin I synthase 2 [imported] - Streptomyces pristinaespiralis(1476 1999)	A-d	train	191	14560	2.4821	2.238	0.6143	0.8651	0.3146	0.4219	0.1307	0.1732	0.0213	0.0611	0.0015	0.001	0	0	0
gi|7522107|pir||T30289 pristinamycin I synthase 3 - Streptomyces pristinaespiralis(1496 1974)	A-d	train	187	14734	2.0692	2.1309	0.5425	0.8483	0.3039	0.4261	0.1075	0.1939	0.012	0.065	0.0005	0.0002	0	0	0
gi|7522106|pir||T30288 pristinamycin I synthase 2 [imported] - Streptomyces pristinaespiralis(1476 1999)	A-d	train	191	14760	2.3114	2.1857	0.598	0.8449	0.3018	0.4117	0.1234	0.1659	0.0164	0.058	0.0011	0.0008	0	0	0
gi|7522107|pir||T30289 pristinamycin I synthase 3 - Streptomyces pristinaespiralis(2926 3434)	A-d	train	223	15098	5.5573	3.089	0.7784	0.9289	0.3943	0.4929	0.1139	0.1882	0.0074	0.0441	0.0005	0.0009	0	0	0
gi|7522107|pir||T30289 pristinamycin I synthase 3 - Streptomyces pristinaespiralis(3971 4497)	A-d	train	218	15318	3.5326	2.6003	0.6787	0.7877	0.3105	0.3502	0.1068	0.1263	0.0099	0.0234	0.0001	0	0	0	0
gi|5911453|gb|AAD55799.1|AF184620_1 salicyl-AMP ligase PchD [Pseudomonas aeruginosa](12 542)	A-d	train	229	15680	4.243	2.8959	0.6921	0.8512	0.3238	0.3749	0.0985	0.1314	0.0166	0.0251	0.0003	0.0013	0	0	0
gi|5911455|gb|AAD55800.1|AF184621_1 pyochelin synthetase PchE [Pseudomonas aeruginosa](536 1008)	A-d	train	189	15284	1.6589	2.0526	0.5504	0.8088	0.2919	0.392	0.1067	0.1736	0.0289	0.0471	0.0007	0.0037	0	0	0
gi|5911457|gb|AAD55801.1|AF184622_1 pyochelin synthetase PchF [Pseudomonas aeruginosa](496 985)	A-d	train	210	15518	3.8205	2.7285	0.6672	0.9381	0.2961	0.4298	0.0945	0.1399	0.0114	0.0315	0.0003	0.001	0	0	0
gi|396481|emb|CAA49816.1| srfA1 [Bacillus subtilis](439 963)	A-d	train	231	15880	5.5969	3.14	0.7971	0.8604	0.3679	0.36	0.0871	0.1059	0.011	0.0136	0	0	0	0	0
gi|396481|emb|CAA49816.1| srfA1 [Bacillus subtilis](1481 2000)	A-d	train	230	16234	4.3389	2.918	0.7345	0.884	0.314	0.3343	0.0715	0.0858	0.0022	0.002	0	0	0	0	0
gi|396481|emb|CAA49816.1| srfA1 [Bacillus subtilis](2521 3032)	A-d	train	212	16336	2.7521	2.535	0.7212	0.832	0.3863	0.3345	0.0986	0.0679	0.0025	0.0002	0	0	0	0	0
gi|396482|emb|CAA49817.1| srfA2 [Bacillus subtilis](443 958)	A-d	train	213	16570	2.531	2.4473	0.6378	0.8039	0.3268	0.3632	0.0879	0.1124	0.0037	0.0008	0	0	0	0	0
gi|396482|emb|CAA49817.1| srfA2 [Bacillus subtilis](1477 2002)	A-d	train	224	16892	3.8958	2.7921	0.7145	0.7848	0.2931	0.2711	0.0622	0.0626	0.0001	0	0	0	0	0	0
gi|396482|emb|CAA49817.1| srfA2 [Bacillus subtilis](2522 3031)	A-d	train	213	17090	2.437	2.4774	0.7034	0.813	0.3616	0.2869	0.0699	0.0283	0	0	0	0	0	0	0
gi|396483|emb|CAA49818.1| srfA3 [Bacillus subtilis](442 961)	A-d	train	234	17438	4.516	2.9971	0.754	0.8434	0.3161	0.3028	0.0569	0.0449	0.0013	0.0016	0	0	0	0	0
gi|3510629|gb|AAC80285.1| syringomycin synthetase [Pseudomonas syringae pv. syringae](372 903)	A-d	train	233	17722	3.495	2.7089	0.6329	0.7728	0.2717	0.3353	0.0477	0.0948	0.0013	0.0009	0	0	0	0	0
gi|3510629|gb|AAC80285.1| syringomycin synthetase [Pseudomonas syringae pv. syringae](1460 1991)	A-d	train	237	18060	4.0095	2.9011	0.6931	0.8235	0.2721	0.3413	0.0318	0.0887	0.0006	0.0004	0	0	0	0	0
gi|3510629|gb|AAC80285.1| syringomycin synthetase [Pseudomonas syringae pv. syringae](2544 3078)	A-d	train	251	18546	5.187	3.2213	0.7769	0.7937	0.2671	0.2396	0.0282	0.0289	0.0001	0	0	0	0	0	0
gi|3510629|gb|AAC80285.1| syringomycin synthetase [Pseudomonas syringae pv. syringae](3631 4165)	A-d	train	233	18680	2.6736	2.5591	0.6497	0.7431	0.2585	0.2455	0.028	0.0464	0.0001	0	0	0	0	0	0
gi|3510629|gb|AAC80285.1| syringomycin synthetase [Pseudomonas syringae pv. syringae](4700 5231)	A-d	train	234	18976	2.5601	2.5034	0.5368	0.7693	0.1842	0.2828	0.0274	0.0816	0.0026	0.0009	0	0	0	0	0
gi|3510629|gb|AAC80285.1| syringomycin synthetase [Pseudomonas syringae pv. syringae](5766 6285)	A-d	train	222	18730	2.0307	2.2481	0.5332	0.7051	0.212	0.2811	0.0343	0.0844	0.0005	0	0	0	0	0	0
gi|3510629|gb|AAC80285.1| syringomycin synthetase [Pseudomonas syringae pv. syringae](5766 6285)	A-d	train	222	18730	2.0307	2.2481	0.5332	0.7051	0.212	0.2811	0.0343	0.0844	0.0005	0	0	0	0	0	0
gi|3510629|gb|AAC80285.1| syringomycin synthetase [Pseudomonas syringae pv. syringae](7922 8447)	A-d	train	236	19002	3.8329	2.7856	0.6625	0.7116	0.2262	0.2437	0.0407	0.0327	0.0003	0.0007	0	0	0	0	0
gi|2623771|gb|AAC45928.1| tyrocidine synthetase 1 [Brevibacillus brevis](11 519)	A-d	train	224	19148	2.3444	2.3923	0.6089	0.6853	0.2304	0.1917	0.0362	0.0388	0.0002	0	0	0	0	0	0
gi|2623772|gb|AAC45929.1| tyrocidine synthetase 2 [Brevibacillus brevis](446 964)	A-d	train	229	19368	2.9095	2.4939	0.6138	0.6484	0.2137	0.206	0.0435	0.0466	0.0004	0.0001	0	0	0	0	0
gi|2623772|gb|AAC45929.1| tyrocidine synthetase 2 [Brevibacillus brevis](1485 1999)	A-d	train	205	18252	1.774	2.1067	0.5824	0.7611	0.2456	0.3475	0.0379	0.0706	0.0028	0	0	0	0	0	0
gi|2623772|gb|AAC45929.1| tyrocidine synthetase 2 [Brevibacillus brevis](2522 3032)	A-d	train	232	18556	4.927	2.9079	0.7464	0.7394	0.245	0.2117	0.0337	0.0305	0.0001	0	0	0	0	0	0
gi|2623773|gb|AAC45930.1| tyrocidine synthetase 3 [Brevibacillus brevis](442 957)	A-d	train	220	18654	2.8733	2.3314	0.6055	0.6503	0.2303	0.23	0.0386	0.0415	0.0007	0.0005	0	0	0	0	0
gi|2623773|gb|AAC45930.1| tyrocidine synthetase 3 [Brevibacillus brevis](1478 1994)	A-d	train	222	18862	2.8441	2.4242	0.6597	0.7412	0.2491	0.2801	0.0267	0.0328	0.0001	0	0	0	0	0	0
gi|2623773|gb|AAC45930.1| tyrocidine synthetase 3 [Brevibacillus brevis](2515 3032)	A-d	train	215	18908	2.0694	2.1487	0.5678	0.7153	0.2174	0.2467	0.0205	0.0402	0.0001	0	0	0	0	0	0
gi|2623773|gb|AAC45930.1| tyrocidine synthetase 3 [Brevibacillus brevis](4588 5111)	A-d	train	242	19276	5.3197	3.011	0.6939	0.6842	0.2372	0.2471	0.0232	0.0442	0.0001	0.0002	0	0	0	0	0
gi|2623773|gb|AAC45930.1| tyrocidine synthetase 3 [Brevibacillus brevis](4588 5111)	A-d	train	242	19276	5.3197	3.011	0.6939	0.6842	0.2372	0.2471	0.0232	0.0442	0.0001	0.0002	0	0	0	0	0
gi|2623773|gb|AAC45930.1| tyrocidine synthetase 3 [Brevibacillus brevis](5634 6154)	A-d	train	208	18952	1.7245	2.023	0.5277	0.6409	0.2066	0.2283	0.0456	0.0525	0.0009	0.0001	0	0	0	0	0
gi|9937225|gb|AAG02356.1|AF210249_15 peptide synthetase NRPS7 [Streptomyces verticillus](436 951)	A-d	test	189	3916	4.9835	5.7828	1.1339	2.0855	0.8524	1.4978	0.8297	1.2818	0.8482	1.166	0.8717	1.0978	0.8783	1.0334	0.8589
gi|9937227|gb|AAG02358.1|AF210249_17 peptide synthetase NRPS6 [Streptomyces verticillus](491 1010)	A-d	test	199	4498	4.9595	5.5028	1.092	1.8963	0.8627	1.3662	0.8676	1.1915	0.8758	1.0877	0.8508	0.9816	0.8115	0.8867	0.7601
gi|9937233|gb|AAG02364.1|AF210249_23 peptide synthetase NRPS2-1 [Streptomyces verticillus](432 954)	A-d	test	209	5076	5.588	5.9017	1.2097	1.7984	0.9544	1.2589	0.9639	1.1178	0.9696	1.0389	0.9406	0.978	0.9119	0.9275	0.8874
gi|9937233|gb|AAG02364.1|AF210249_23 peptide synthetase NRPS2-1 [Streptomyces verticillus](1493 2021)	A-d	test	220	5702	6.731	6.1288	1.3472	1.7596	1.0074	1.2543	0.9918	1.119	0.9759	1.0327	0.9389	0.9584	0.9021	0.8996	0.8495
gi|9937234|gb|AAG02365.1|AF210249_24 peptide synthetase NRPS0 [Streptomyces verticillus](11 519)	A-d	test	212	6224	4.3948	5.0739	0.9644	1.7323	0.7996	1.1795	0.6785	0.8438	0.5288	0.6052	0.3947	0.4227	0.2722	0.2858	0.1796
gi|16040970|dbj|BAB69698.1| iturin A synthetase A [Bacillus subtilis](1 554)	A-d	test	238	7032	8.4758	6.756	1.6111	1.6997	1.0838	1.1533	0.9565	0.9459	0.8312	0.8049	0.7131	0.6562	0.5552	0.4869	0.391
gi|16040970|dbj|BAB69698.1| iturin A synthetase A [Bacillus subtilis](2929 3445)	A-d	test	249	7824	8.2415	6.5749	1.5581	1.6355	1.0916	1.1698	0.995	0.9848	0.8763	0.8246	0.7197	0.6386	0.5432	0.4573	0.3796
gi|16040971|dbj|BAB69699.1| iturin A synthetase B [Bacillus subtilis](241 756)	A-d	test	256	8744	7.7904	6.1441	1.3873	1.4725	0.9521	0.9467	0.7772	0.7324	0.6179	0.5329	0.4221	0.332	0.218	0.1455	0.0633
gi|16040971|dbj|BAB69699.1| iturin A synthetase B [Bacillus subtilis](1753 2268)	A-d	test	236	9114	4.8124	4.8861	1.1202	1.2963	0.8067	0.7822	0.5747	0.4924	0.3635	0.2631	0.1537	0.0959	0.0347	0.0126	0.0001
gi|16040971|dbj|BAB69699.1| iturin A synthetase B [Bacillus subtilis](3261 3788)	A-d	test	240	9776	5.5023	5.2138	1.2219	1.3156	0.8177	0.7574	0.5556	0.4457	0.2984	0.1875	0.1035	0.0464	0.0184	0.0032	0
gi|16040971|dbj|BAB69699.1| iturin A synthetase B [Bacillus subtilis](4308 4825)	A-d	test	236	10294	4.0966	4.4183	1.0574	1.2203	0.7411	0.6864	0.4887	0.3904	0.2235	0.1578	0.0629	0.0334	0.0002	0	0
gi|16040972|dbj|BAB69700.1| iturin A synthetase C [Bacillus subtilis](239 756)	A-d	test	231	10584	3.872	4.3606	1.0898	1.1947	0.7731	0.6783	0.4981	0.3759	0.2251	0.1294	0.0634	0.0113	0.0001	0	0
gi|16040972|dbj|BAB69700.1| iturin A synthetase C [Bacillus subtilis](1750 2278)	A-d	test	247	11216	5.7287	4.809	1.1861	1.2406	0.7909	0.7342	0.4853	0.3852	0.1836	0.128	0.0344	0.0133	0	0	0
gi|9955394|dbj|BAB12213.1| peptide synthetase and polyketide synthase [Microcystis aeruginosa](1 543)	A-d	test	241	11678	4.0024	4.353	1.0273	1.1733	0.6445	0.5372	0.3081	0.2197	0.1055	0.0503	0.0173	0.0105	0.0003	0	0
gi|9955392|dbj|BAB12211.1| polykeitde synthase and peptide synthetase [Microcystis aeruginosa](2438 2959)	A-d	test	240	12154	4.1442	4.3913	1.1429	1.1939	0.795	0.6963	0.4751	0.3015	0.1436	0.0596	0.0065	0	0	0	0
gi|5822841|dbj|BAA83992.1| mcyA [Microcystis aeruginosa](226 729)	A-d	test	223	11898	3.1463	3.6722	0.9626	1.1182	0.6512	0.606	0.3335	0.2511	0.1067	0.0689	0.0099	0.0078	0	0	0
gi|5822841|dbj|BAA83992.1| mcyA [Microcystis aeruginosa](1710 2224)	A-d	test	209	11436	2.932	3.5421	0.9292	1.1015	0.6704	0.6322	0.3923	0.3155	0.1632	0.1051	0.021	0.0047	0	0	0
gi|5822841|dbj|BAA83992.1| mcyA [Microcystis aeruginosa](1710 2224)	A-d	test	209	11436	2.932	3.5421	0.9292	1.1015	0.6704	0.6322	0.3923	0.3155	0.1632	0.1051	0.021	0.0047	0	0	0
gi|5822842|dbj|BAA83993.1| mcyB [Microcystis aeruginosa](450 966)	A-d	test	192	10520	2.5526	3.2241	0.8241	1.1165	0.6555	0.6973	0.4322	0.4204	0.228	0.2059	0.0537	0.0515	0.0049	0.0061	0
gi|5822843|dbj|BAA83994.1| mcyC [Microcystis aeruginosa](456 971)	A-d	test	209	10956	4.579	3.803	0.9652	1.1389	0.6702	0.6589	0.4154	0.3452	0.1939	0.1208	0.036	0.0142	0	0	0
gi|16040970|dbj|BAB69698.1| iturin A synthetase A [Bacillus subtilis](1 554)	A-d	test	238	11300	7.5838	4.9162	1.165	1.2096	0.6657	0.6557	0.3561	0.3203	0.1369	0.1134	0.0172	0.0073	0	0	0
gi|6449055|gb|AAF08795.1|AF184956_2 MycA [Bacillus subtilis](2918 3434)	A-d	test	231	11760	5.1249	4.141	0.9862	1.1195	0.6625	0.6092	0.3611	0.2707	0.1242	0.0658	0.0135	0.0035	0	0	0
gi|6449056|gb|AAF08796.1|AF184956_3 MycB [Bacillus subtilis](239 756)	A-d	test	234	12234	4.9755	4.0339	1.0159	1.1086	0.6997	0.6228	0.3887	0.2901	0.1148	0.0546	0.0133	0.0036	0	0	0
gi|6449056|gb|AAF08796.1|AF184956_3 MycB [Bacillus subtilis](1752 2267)	A-d	test	227	12564	3.7653	3.7385	0.9235	1.0036	0.5641	0.4732	0.2769	0.1775	0.0648	0.0236	0.0005	0	0	0	0
gi|6449056|gb|AAF08796.1|AF184956_3 MycB [Bacillus subtilis](3262 3793)	A-d	test	234	13046	4.0747	3.7985	0.925	1.0263	0.5836	0.533	0.2724	0.1992	0.0808	0.0528	0.019	0.0111	0	0	0
gi|6449056|gb|AAF08796.1|AF184956_3 MycB [Bacillus subtilis](4314 4832)	A-d	test	230	13370	3.4033	3.5185	0.8491	1.0348	0.5106	0.4798	0.2067	0.1754	0.0444	0.0369	0.0044	0.0037	0	0	0
gi|6449057|gb|AAF08797.1|AF184956_4 MycC [Bacillus subtilis](239 764)	A-d	test	266	14218	8.6312	5.0999	1.2342	1.114	0.5846	0.4917	0.2116	0.15	0.0193	0.0053	0	0	0	0	0
gi|6449057|gb|AAF08797.1|AF184956_4 MycC [Bacillus subtilis](1759 2274)	A-d	test	232	14348	3.3095	3.4787	0.8895	0.9902	0.5423	0.5002	0.1963	0.1419	0.0237	0.013	0	0	0	0	0
gi|3818604|gb|AAC69587.1| Ybt peptide synthetase HMWP2 [Yersinia pestis](551 1034)	A-d	test	212	13702	2.4115	3.0285	0.7146	1.0103	0.4499	0.5031	0.1813	0.23	0.0431	0.0654	0.0012	0.0087	0	0	0
pdb|12asA00	CATH	train	156	652	18.6374	18.4575	8.7462	9.186	6.1008	6.382	4.8481	5.0321	4.1062	4.2219	3.6092	3.6808	3.2529	3.2917	2.9786
pdb|156b000	CATH	train	52	260	7.157	7.1843	3.5945	3.2389	2.4346	2.1837	1.8885	1.7294	1.5836	1.4831	1.3983	1.3322	1.2767	1.2329	1.1958
pdb|16pkA01	CATH	train	88	602	8.0579	7.575	2.74	2.6967	1.6547	1.6389	1.29	1.2809	1.14	1.1326	1.0704	1.0639	1.0374	1.0321	1.0163
pdb|16vpA00	CATH	test	148	1182	11.485	10.2531	3.3083	3.5694	1.792	2.107	1.3186	1.5703	1.1346	1.3152	1.0592	1.1754	1.03	1.0998	1.0164
pdb|1914A00	CATH	train	115	1366	7.9222	7.5231	2.266	2.0437	1.3152	1.2371	1.0886	1.0626	1.0266	1.0268	1.0168	1.0209	1.0146	1.0193	1.0138
pdb|1a02F00	CATH	train	31	210	3.5556	3.6779	1.6234	1.5846	1.19	1.1648	1.0637	1.0516	1.023	1.0165	1.0074	1.0051	1.0026	1.0028	1.0018
pdb|1a04A01	CATH	train	57	404	5.3171	4.8755	1.8545	2.0083	1.2593	1.3832	1.096	1.1651	1.0384	1.0764	1.0148	1.0412	1.0115	1.0288	1.015
pdb|1a04A02	CATH	test	43	424	2.7282	2.766	0.9373	1.3452	0.8853	1.1203	0.9342	1.0553	0.97	1.0261	0.9857	1.0128	0.9925	1.0079	0.9968
pdb|1a06A01	CATH	train	42	494	2.4072	2.6192	1.0054	1.2231	0.9588	1.0519	0.98	1.0113	0.9814	0.9914	0.9749	0.9776	0.9662	0.967	0.9597
pdb|1a0aA00	CATH	train	27	296	1.839	2.1889	1.0244	1.1881	0.9873	1.0434	0.994	1.0119	0.9977	1.0048	0.9986	1.0034	1.0004	1.0032	1.001
pdb|1a0cA00	CATH	train	210	1206	26.5554	24.0046	11.491	10.1895	7.216	6.4665	5.3239	4.8531	4.2865	3.9722	3.6435	3.4223	3.2078	3.048	2.8927
pdb|1a0hA01	CATH	test	53	474	6.0054	5.1023	2.1968	1.9509	1.4208	1.3308	1.1868	1.1458	1.0987	1.0802	1.0639	1.0577	1.0502	1.0456	1.0413
pdb|1a0hA02	CATH	train	42	484	3.3611	3.1176	1.2521	1.3295	1.0276	1.073	1.0028	1.0186	0.9938	0.9973	0.9833	0.9852	0.9793	0.9787	0.978
pdb|1a0iA01	CATH	train	44	588	2.9907	2.8242	1.1032	1.2391	0.9836	1.0458	0.9893	1.006	0.9923	0.9958	0.9928	0.9938	0.9922	0.9933	0.9917
pdb|1a0iA02	CATH	train	55	750	3.763	3.3448	1.2479	1.2919	1.024	1.0484	0.9939	0.9987	0.9803	0.98	0.969	0.9666	0.9592	0.9584	0.9579
pdb|1a0iA03	CATH	test	79	1044	6.2004	4.8164	1.7676	1.5649	1.1772	1.1336	1.0597	1.0557	1.0432	1.0482	1.0527	1.061	1.0693	1.0764	1.0847
pdb|1a0pA01	CATH	train	52	950	2.4936	2.5183	1.0322	1.1397	0.9959	1.0207	1.0025	1.0067	1.0028	1.0045	1.002	1.004	1.0017	1.0038	1.0015
pdb|1a0pA02	CATH	train	89	1240	6.7013	4.9972	1.7815	1.6289	1.1654	1.1501	1.0571	1.0643	1.0439	1.0536	1.0519	1.0603	1.0632	1.066	1.067
pdb|1a0rP02	CATH	train	51	1072	2.1482	2.2093	0.9869	1.0855	0.9882	1.0003	0.987	0.9861	0.9841	0.9834	0.9832	0.9831	0.9831	0.9831	0.9831
pdb|1a0sP00	CATH	test	177	1810	17.9035	14.8256	5.8375	4.7788	2.902	2.4052	1.8203	1.5872	1.3583	1.2434	1.1403	1.0777	1.0297	0.995	0.9699
pdb|1a17A00	CATH	train	84	1500	5.0726	3.9165	1.3832	1.2955	1.0614	1.0478	1.0199	1.018	1.016	1.016	1.0164	1.017	1.0172	1.0172	1.0172
pdb|1a1hA01	CATH	train	16	108	1.9593	2.0403	1.1694	1.184	1.0414	1.0402	1.0111	1.0087	1.0026	1.0018	0.9995	0.9968	0.9957	0.9941	0.9938
pdb|1a1tA00	CATH	train	28	194	3.5552	3.2795	1.741	1.5569	1.2697	1.1897	1.1069	1.0736	1.0446	1.028	1.0166	1.0083	1.0017	0.9973	0.9941
pdb|1a1wA00	CATH	test	42	334	4.0161	3.6144	1.5274	1.4547	1.1376	1.1095	1.0414	1.0308	1.0135	1.0078	1.0041	1.004	1.0024	1.0035	1.0025
pdb|1a1xA00	CATH	train	46	474	3.1546	3.0718	1.2352	1.2815	1.0417	1.0512	1.0044	1.0015	0.9902	0.9879	0.9833	0.9828	0.9822	0.9822	0.9822
pdb|1a2oA01	CATH	train	66	712	4.029	3.4291	1.1267	1.488	0.9137	1.1742	0.9329	1.0774	0.9563	1.0324	0.9695	1.0034	0.9662	0.9854	0.9603
pdb|1a2pA00	CATH	train	44	646	2.2166	2.4575	1.0843	1.1212	1.0103	1.0135	1.0017	1.0037	1.0007	1.002	1.0007	1.0016	1.0002	1.0013	1.0001
pdb|1a2xB00	CATH	test	25	322	1.5996	1.7251	1.0155	1.0535	1.0009	1.009	1.0068	1.0092	1.0104	1.0122	1.014	1.0153	1.016	1.0163	1.0166
pdb|1a31A03	CATH	train	86	668	11.2391	9.2988	4.3705	3.4522	2.4353	2.0215	1.6851	1.4978	1.3579	1.2697	1.2021	1.1618	1.1307	1.11	1.0948
pdb|1a34A00	CATH	train	72	796	5.1125	4.5795	1.5985	1.5497	1.1415	1.1285	1.0495	1.0497	1.0366	1.0421	1.0452	1.0491	1.0531	1.0575	1.0594
pdb|1a35A04	CATH	train	41	562	2.361	2.3563	1.0875	1.1326	1.0108	1.025	1.0101	1.0218	1.022	1.0294	1.0333	1.0416	1.0436	1.0473	1.0483
pdb|1a3aC00	CATH	test	69	800	5.814	4.4552	1.7243	1.5302	1.1565	1.1109	1.0376	1.0226	1.0064	1.0018	0.9979	0.9976	0.9976	0.9976	0.9976
pdb|1a3qA01	CATH	train	101	1194	9.5798	7.4135	2.8018	2.2171	1.5328	1.3442	1.1749	1.1026	1.0415	1.0096	0.9837	0.9677	0.9554	0.9461	0.9389
pdb|1a3wA01	CATH	train	69	1162	3.2218	3.1174	1.1376	1.1939	1.0136	1.0366	1.0185	1.0296	1.0292	1.0379	1.0391	1.0451	1.0482	1.0525	1.0557
pdb|1a41A01	CATH	train	65	1232	2.7112	2.6823	1.0679	1.1563	1.0007	1.0272	1.0039	1.0122	1.0053	1.0098	1.0075	1.0093	1.0104	1.0099	1.0108
pdb|1a41A02	CATH	test	43	840	1.673	1.8406	0.9318	1.0731	0.9785	1.0095	0.9799	0.9926	0.9687	0.9776	0.9534	0.96	0.9422	0.9412	0.9356
pdb|1a4iA02	CATH	train	39	768	1.4666	1.7125	0.9185	1.0628	0.9823	1.0146	1.0014	1.0106	1.0086	1.0104	1.0097	1.0105	1.0096	1.0102	1.0096
pdb|1a4iB01	CATH	train	62	948	4.4211	3.261	1.4082	1.3028	1.0684	1.054	1.0091	1.0019	0.9908	0.9872	0.984	0.9815	0.9809	0.9806	0.9805
pdb|1a4pA00	CATH	train	51	980	2.2149	2.1154	0.9833	1.0917	0.9716	0.997	0.9601	0.9654	0.9509	0.9518	0.9484	0.9484	0.9484	0.9484	0.9484
pdb|1a53A00	CATH	test	116	1436	11.0826	7.7041	3.095	2.3347	1.609	1.3818	1.1903	1.1095	1.0489	1.0191	1.0001	0.9887	0.9802	0.9754	0.9733
pdb|1a59A02	CATH	train	59	1220	2.5981	2.3398	1.0722	1.1041	1.0063	1.0285	1.0186	1.0435	1.0492	1.0695	1.0799	1.0913	1.0952	1.0975	1.0976
pdb|1a5tA01	CATH	train	72	1410	3.6491	2.9584	1.2145	1.1932	1.0079	1.0059	0.955	0.9502	0.9302	0.9295	0.919	0.9182	0.9174	0.9174	0.9174
pdb|1a5tA02	CATH	train	18	202	1.2449	1.4803	0.9445	1.051	0.9872	1.0085	0.996	0.9995	0.9948	0.9954	0.9941	0.994	0.994	0.994	0.994
pdb|1a5tA03	CATH	test	54	378	5.8933	4.9536	2.2507	2.0659	1.4647	1.384	1.1996	1.1573	1.0907	1.0678	1.04	1.0278	1.0133	1.0055	0.9972
pdb|1a62A01	CATH	train	28	302	2.2533	2.1226	1.1228	1.1243	1.0147	1.0175	1.004	1.01	1.0097	1.0137	1.0146	1.0185	1.0187	1.0192	1.0192
pdb|1a62A02	CATH	train	40	412	3.8944	3.3358	1.5759	1.3902	1.1511	1.0911	1.0435	1.024	1.0112	1.0044	1.0002	0.9991	0.9978	0.9973	0.9972
pdb|1a6bB00	CATH	train	24	312	1.646	1.6493	1.0101	1.0466	0.9991	1.0023	0.9962	0.9949	0.9937	0.9937	0.9938	0.9938	0.9938	0.9938	0.9938
pdb|1a6cA01	CATH	test	138	886	16.3568	15.2452	7.1499	6.4406	4.5724	4.0978	3.402	3.0934	2.7449	2.5337	2.3281	2.1795	2.042	1.933	1.8359
pdb|1a6cA02	CATH	train	75	780	6.2406	5.8523	2.1935	1.9407	1.3729	1.2658	1.1294	1.0853	1.0433	1.0173	0.9945	0.9778	0.9635	0.9525	0.9418
pdb|1a6fA00	CATH	train	56	754	4.1443	3.595	1.4897	1.3184	1.0949	1.0512	1.015	1.0028	0.9931	0.9883	0.9854	0.9839	0.9826	0.9817	0.9808
pdb|1a6jA00	CATH	train	68	968	4.2075	3.5682	1.3736	1.3075	1.062	1.0477	1.0065	1.0025	0.9965	0.995	0.9942	0.994	0.9936	0.9936	0.9936
pdb|1a6qA02	CATH	test	44	732	2.4112	2.2801	1.0833	1.0986	1.0087	1.0042	0.9993	0.999	0.999	0.999	0.999	0.999	0.999	0.999	0.999
pdb|1a6sA00	CATH	train	47	842	2.4581	2.2681	1.0882	1.0927	1.0061	1.0073	0.9906	0.9947	0.9864	0.9909	0.9843	0.9873	0.9831	0.9842	0.9811
pdb|1a6zA01	CATH	train	97	1194	9.3374	6.8058	2.7215	2.1445	1.4917	1.3202	1.161	1.1064	1.0593	1.0404	1.0259	1.021	1.0167	1.0167	1.0162
pdb|1a73A00	CATH	train	69	1206	3.0845	2.8559	1.0365	1.2067	0.9782	1.0335	0.9811	0.9936	0.9737	0.9695	0.9547	0.9417	0.9299	0.9119	0.8977
pdb|1a76A01	CATH	test	107	1598	8.3577	5.5711	2.0064	1.5943	1.1833	1.089	0.9976	0.9686	0.9451	0.9373	0.9335	0.9322	0.932	0.932	0.932
pdb|1a79A01	CATH	train	47	1066	1.846	1.9038	1.0173	1.0483	0.9945	0.9896	0.9881	0.988	0.988	0.988	0.988	0.988	0.988	0.988	0.988
pdb|1a7cA02	CATH	train	55	1178	2.2177	2.0864	1.0138	1.0878	1.0049	1.0329	1.0307	1.0424	1.0516	1.0656	1.077	1.0849	1.0971	1.1043	1.1108
pdb|1a7jA00	CATH	train	142	1778	14.754	10.5345	4.2387	3.0192	1.9794	1.6111	1.3513	1.2295	1.1543	1.1114	1.0853	1.0697	1.0614	1.0558	1.0511
pdb|1a7sA01	CATH	test	52	1260	1.9288	1.8944	1.0008	1.0411	0.9929	0.997	0.9931	0.992	0.9924	0.9926	0.9925	0.9927	0.9928	0.9927	0.9928
pdb|1a7sA02	CATH	train	49	1282	1.6073	1.7617	0.9741	1.0299	0.9765	0.9768	0.9672	0.9644	0.9616	0.9602	0.9587	0.9574	0.9573	0.9573	0.9573
pdb|1a8dA01	CATH	train	99	1614	7.459	5.0599	1.9523	1.5759	1.205	1.1375	1.0823	1.0823	1.0799	1.0935	1.1031	1.1128	1.1255	1.1393	1.1535
pdb|1a8dA02	CATH	train	101	1946	5.9145	4.548	1.676	1.4393	1.1528	1.1104	1.0735	1.0677	1.0612	1.0595	1.0582	1.0582	1.0582	1.0582	1.0582
pdb|1a8hA02	CATH	test	51	1418	1.4484	1.6607	0.9608	1.037	1.0023	1.0179	1.018	1.0231	1.0235	1.0236	1.0236	1.0236	1.0236	1.0236	1.0236
pdb|1a8lA01	CATH	train	61	1532	2.716	2.1264	1.0592	1.0827	1.0128	1.0257	1.0219	1.0255	1.0257	1.0259	1.0258	1.0259	1.0258	1.0259	1.0258
pdb|1a8lA02	CATH	train	46	1318	1.1795	1.4542	0.9404	1.0332	0.9949	1.0176	1.0065	1.0161	1.0101	1.0167	1.0106	1.0167	1.0105	1.0166	1.0105
pdb|1a8oA00	CATH	train	40	1022	1.3798	1.4647	0.9658	1.0122	0.9859	0.9829	0.9774	0.9734	0.972	0.9718	0.9718	0.9718	0.9718	0.9718	0.9718
pdb|1a8rA01	CATH	test	40	1046	1.1344	1.4121	0.9315	1.0384	0.9906	1.0141	1.0052	1.0097	1.01	1.01	1.01	1.01	1.01	1.01	1.01
pdb|1a8yA01	CATH	train	71	1262	5.6836	3.7699	1.6542	1.3906	1.1195	1.0505	0.9893	0.9654	0.947	0.9378	0.9285	0.9254	0.9225	0.92	0.9185
pdb|1a8yA02	CATH	train	50	1192	2.2459	1.8733	1.0535	1.0489	1.0091	1.0166	1.0168	1.0284	1.0358	1.0479	1.0598	1.0786	1.0921	1.1012	1.1058
pdb|1a8yA03	CATH	train	53	1278	2.4172	2.0378	1.0563	1.0696	1.0051	1.0113	1.0032	1.007	1.0043	1.0062	1.0032	1.0058	1.0031	1.0057	1.0031
pdb|1a91A00	CATH	test	22	316	0.7449	1.4113	0.8073	1.1133	0.9344	1.0373	0.975	1.0149	0.9899	1.0085	0.9951	1.0026	0.9959	0.9995	0.9967
pdb|1a92A00	CATH	train	23	340	1.4529	1.4936	1.0197	1.0467	1.003	1.0071	0.9981	1.0022	0.9973	1.0016	0.9975	1.0017	0.9975	1.0017	0.9975
pdb|1a99A02	CATH	train	78	648	9.4825	7.3066	3.3314	2.5615	1.8107	1.5332	1.3155	1.2082	1.1283	1.0826	1.0535	1.0335	1.0215	1.0124	1.0061
pdb|1a9nC00	CATH	train	86	950	6.685	5.4468	1.9529	1.7028	1.2148	1.1538	1.0528	1.0329	1.0061	0.9969	0.9871	0.9814	0.9773	0.9735	0.9707
pdb|1a9xA03	CATH	test	37	528	2.2804	2.0569	1.0533	1.1012	1.0062	1.0259	1.0156	1.0261	1.0258	1.0304	1.031	1.0328	1.0328	1.0328	1.0328
pdb|1a9xA04	CATH	train	77	816	8.0254	5.7963	2.4254	1.9321	1.3833	1.2549	1.1215	1.085	1.044	1.0335	1.0199	1.0177	1.0125	1.0117	1.0093
pdb|1a9xA05	CATH	train	49	750	2.6521	2.4719	1.0964	1.124	1.0059	1.0158	0.9978	0.9979	0.9879	0.9857	0.9799	0.9761	0.9694	0.9662	0.9585
pdb|1a9xA06	CATH	train	92	1088	6.4386	4.7079	1.6846	1.6094	1.123	1.1471	1.0133	1.0223	0.9719	0.9688	0.9427	0.9413	0.9311	0.9301	0.9245
pdb|1a9xA08	CATH	test	58	1018	2.9837	2.6404	1.1407	1.1357	1.007	0.9923	0.9653	0.9574	0.9488	0.9474	0.9472	0.9472	0.9472	0.9472	0.9472
pdb|1a9xB01	CATH	train	60	1164	2.7024	2.6203	1.13	1.1272	1.0179	1.0309	1.0241	1.0327	1.0335	1.0363	1.0377	1.0382	1.0384	1.0384	1.0384
pdb|1a9xB02	CATH	train	99	1502	6.3578	4.4098	1.5537	1.4459	1.1066	1.1054	1.0564	1.0703	1.0713	1.0864	1.0974	1.1114	1.1281	1.1396	1.1521
pdb|1aa0A00	CATH	train	39	836	1.421	1.7392	0.9877	1.0614	1.0051	1.027	1.0279	1.037	1.0397	1.0427	1.0428	1.0428	1.0428	1.0428	1.0428
pdb|1aapA00	CATH	test	29	536	1.3046	1.442	0.9778	1.0242	0.9966	1.0039	0.9987	1.0005	0.997	0.9977	0.9931	0.9916	0.9898	0.9896	0.9898
pdb|1ab4A01	CATH	train	116	1016	10.555	7.6872	2.953	2.4608	1.5835	1.4514	1.2012	1.1604	1.0756	1.0618	1.0333	1.0272	1.0152	1.0129	1.0104
pdb|1ab4A02	CATH	train	58	834	4.2927	3.1723	1.361	1.2377	1.0544	1.0356	0.997	0.9846	0.973	0.9663	0.9616	0.9601	0.9564	0.9546	0.9521
pdb|1ab4A03	CATH	train	57	948	1.9866	2.1158	0.8006	1.2207	0.8696	1.081	0.932	1.0346	0.9702	1.0329	0.9983	1.0346	1.0149	1.0354	1.0236
pdb|1abaA00	CATH	test	46	868	2.1961	2.0204	1.0366	1.0621	0.9993	1.0104	1.0094	1.0138	1.0145	1.0164	1.0158	1.0172	1.0161	1.0173	1.0161
pdb|1abrA01	CATH	train	75	1116	5.0576	4.0225	1.5659	1.4235	1.1239	1.0899	1.0387	1.0319	1.023	1.0219	1.02	1.0223	1.0208	1.0236	1.0227
pdb|1abrA02	CATH	train	32	642	1.0983	1.4288	0.9586	1.0289	0.9922	1.0099	0.9969	1.0084	0.9975	1.0082	0.9975	1.0082	0.9975	1.0081	0.9974
pdb|1abvA00	CATH	train	45	734	2.3114	2.0873	0.9995	1.1373	0.9754	1.0237	0.9773	0.9947	0.9744	0.9811	0.972	0.975	0.9706	0.9712	0.9704
pdb|1abzA00	CATH	test	25	446	1.1876	1.3238	0.9625	1.0205	0.9944	1.0082	0.9999	1.0086	1.0027	1.0094	1.003	1.0097	1.0031	1.0097	1.0031
pdb|1ac0A00	CATH	train	48	568	4.7413	3.5576	1.6878	1.4707	1.1909	1.133	1.0711	1.0542	1.0381	1.0333	1.0307	1.0297	1.0314	1.0358	1.0378
pdb|1ac5A00	CATH	train	204	1456	23.7296	20.7149	9.2963	7.6351	5.2079	4.3107	3.4528	2.9655	2.5614	2.2823	2.0587	1.8893	1.7544	1.6446	1.5611
pdb|1accA01	CATH	train	121	1388	10.3442	9.221	3.2528	2.6925	1.7242	1.513	1.2776	1.1992	1.1265	1.1001	1.0776	1.068	1.0619	1.0603	1.0585
pdb|1accA02	CATH	test	95	1392	4.7646	4.6372	1.4073	1.5653	1.0505	1.1542	1.0172	1.0778	1.0332	1.066	1.0484	1.0642	1.0578	1.0645	1.0611
pdb|1accA03	CATH	train	56	986	2.9075	2.6695	1.1862	1.1484	1.0315	1.0372	1.0319	1.0376	1.0386	1.0388	1.0388	1.0388	1.0388	1.0388	1.0388
pdb|1accA04	CATH	train	60	1148	3.0156	2.7154	1.2115	1.1437	1.0225	1.0134	0.9994	0.9988	0.9953	0.9959	0.9953	0.9954	0.9954	0.9953	0.9954
pdb|1acfA00	CATH	train	50	1066	1.7379	1.9729	1.0131	1.0612	1	1.0157	1.0089	1.0155	1.0116	1.0155	1.0142	1.018	1.016	1.0206	1.0177
pdb|1ad2A01	CATH	test	63	1240	3.7587	2.8213	1.2567	1.1486	1.0344	1.0326	1.0265	1.0352	1.0434	1.0584	1.07	1.0853	1.0973	1.1059	1.1104
pdb|1ad2A02	CATH	train	48	1148	1.6019	1.7412	0.9881	1.0458	1.013	1.0355	1.035	1.0411	1.0416	1.0416	1.0416	1.0416	1.0416	1.0416	1.0416
pdb|1ad3A01	CATH	train	114	1568	10.0985	7.0227	2.7602	2.1293	1.5115	1.3312	1.1934	1.1352	1.0952	1.0747	1.0618	1.0544	1.0506	1.0477	1.0453
pdb|1ad3A02	CATH	train	83	1632	4.1647	3.2282	1.2627	1.1791	1.0452	1.0634	1.0548	1.0687	1.0703	1.0706	1.0706	1.0706	1.0706	1.0706	1.0706
pdb|1ad5A01	CATH	test	28	536	1.1869	1.3469	0.9532	1.0235	0.9956	1.0022	0.9975	0.9984	0.9962	0.9957	0.9947	0.9944	0.9943	0.9933	0.9928
pdb|1adeA02	CATH	train	51	684	4.4967	3.165	1.4812	1.2954	1.0982	1.0581	1.0208	1.0106	1.0004	0.9972	0.9927	0.9924	0.9907	0.9904	0.9897
pdb|1adnA00	CATH	train	52	826	3.1936	2.7275	1.2014	1.1846	1.0204	1.0238	0.9874	0.9817	0.9669	0.962	0.9567	0.9533	0.9491	0.9478	0.9471
pdb|1adtA01	CATH	train	58	980	2.6794	2.4532	1.0446	1.1471	0.9851	1.0115	0.9721	0.9695	0.9546	0.9495	0.9402	0.9364	0.9307	0.9278	0.9235
pdb|1adtA02	CATH	test	67	1166	3.6034	3.0293	1.2301	1.1753	1.0219	1.0151	0.9877	0.9833	0.9739	0.9701	0.9647	0.9595	0.9531	0.9472	0.9389
pdb|1ae9A00	CATH	train	99	1520	8.0328	5.3904	2.0654	1.5801	1.2104	1.1193	1.062	1.0499	1.0449	1.0476	1.0513	1.0566	1.0616	1.0713	1.08
pdb|1aepA00	CATH	train	73	1558	3.1388	2.8394	1.1531	1.1287	0.993	0.978	0.941	0.9229	0.9004	0.8834	0.87	0.8597	0.8555	0.8552	0.8552
pdb|1af6A00	CATH	train	195	2384	18.5497	15.137	6.0026	4.7524	2.9624	2.4007	1.8399	1.5801	1.359	1.2329	1.133	1.0631	1.0083	0.9615	0.9199
pdb|1af7A01	CATH	test	41	908	1.5156	1.6042	0.9685	1.0387	0.9934	1.0068	0.9967	1.0044	0.9978	1.0041	0.9975	1.0042	0.9975	1.0042	0.9975
pdb|1af7A02	CATH	train	82	1184	6.8635	4.3326	1.702	1.4058	1.1054	1.06	1.0042	0.9893	0.9726	0.9587	0.9445	0.93	0.9152	0.9062	0.8982
pdb|1afoA00	CATH	train	14	122	1.1479	1.4451	0.9151	1.0658	0.9743	1.0124	0.993	1.0021	0.9976	0.999	0.9975	0.9976	0.9973	0.9976	0.997
pdb|1afpA00	CATH	train	26	184	2.7063	2.486	1.2333	1.2796	1.0624	1.0724	1.02	1.0232	1.0086	1.0096	1.0058	1.0069	1.006	1.0062	1.0062
pdb|1afwA01	CATH	test	85	534	9.7016	8.3422	3.6362	3.2004	2.1122	1.9397	1.5529	1.4674	1.2984	1.2506	1.1673	1.1394	1.0962	1.0803	1.0588
pdb|1aggA00	CATH	train	21	200	1.6516	1.8047	1.0164	1.089	0.9946	1.0129	0.9981	1.002	0.9984	0.999	0.9972	0.9962	0.9945	0.9939	0.993
pdb|1agjA01	CATH	train	66	476	8.3671	7.7096	3.8258	3.1084	2.2854	1.9327	1.6491	1.478	1.3531	1.2663	1.2016	1.1542	1.1182	1.0903	1.0693
pdb|1agjA02	CATH	train	52	552	4.0054	3.7315	1.5394	1.3928	1.1233	1.0774	1.0272	1.0114	0.9981	0.9894	0.9802	0.9727	0.9661	0.9589	0.9528
pdb|1agrE02	CATH	test	45	598	3.2096	2.9719	1.2942	1.21	1.0479	1.029	1.0006	0.9887	0.9793	0.9745	0.9729	0.9728	0.9728	0.9728	0.9728
pdb|1agrH01	CATH	train	16	170	1.0919	1.3478	0.9523	1.0276	0.9935	1.0028	1.0019	1.004	1.0037	1.005	1.0061	1.0065	1.0063	1.0061	1.0061
pdb|1ah7A00	CATH	train	122	678	17.0335	16.6805	8.5015	7.7077	5.7365	5.1389	4.3887	3.9987	3.6222	3.3663	3.1427	2.97	2.8192	2.6937	2.5835
pdb|1ahoA00	CATH	train	29	242	2.77	2.544	1.2075	1.2884	1.0294	1.0695	1.002	1.0158	0.9953	0.9975	0.9888	0.9879	0.983	0.9822	0.9798
pdb|1ahsA00	CATH	test	51	420	4.4441	4.2264	1.7191	1.7854	1.2542	1.2631	1.1024	1.097	1.0405	1.033	1.0102	1.0074	0.997	0.9954	0.9922
pdb|1aihA00	CATH	train	93	788	9.917	7.6139	2.9638	2.3332	1.587	1.3826	1.202	1.1297	1.0711	1.0407	1.0166	0.9955	0.9806	0.9689	0.9606
pdb|1aipE02	CATH	train	63	794	4.2544	3.6709	1.4232	1.3226	1.074	1.0502	1.0056	0.9944	0.9789	0.9704	0.9608	0.9498	0.9403	0.9329	0.9252
pdb|1aipE03	CATH	train	25	306	1.2931	1.5998	0.8967	1.0841	0.9657	1.0201	0.9912	1.01	1.0009	1.0103	1.0052	1.0123	1.0095	1.014	1.0132
pdb|1aisB01	CATH	test	57	512	5.6587	4.1258	1.7126	1.5518	1.1698	1.1352	1.0437	1.0322	1.0017	0.9966	0.9846	0.9819	0.975	0.9725	0.9701
pdb|1aisB02	CATH	train	48	588	3.3816	2.8261	1.2365	1.2039	1.0301	1.0267	0.9956	0.9896	0.9803	0.9793	0.9769	0.9768	0.9768	0.9768	0.9768
pdb|1aiwA00	CATH	train	29	430	1.8331	1.8694	1.0574	1.0809	1.0065	1.0121	1.0044	1.009	1.0089	1.0123	1.0126	1.0151	1.0157	1.0171	1.0178
pdb|1ajkA00	CATH	train	90	782	7.8976	7.1656	2.7285	3.0376	1.7964	1.9739	1.4667	1.542	1.3038	1.3337	1.2101	1.2211	1.1514	1.1532	1.1149
pdb|1ajoB00	CATH	test	81	1020	4.6868	4.837	1.6778	1.858	1.2396	1.3051	1.114	1.1243	1.0501	1.044	1.0094	1.0004	0.982	0.9719	0.9609
pdb|1ajsA01	CATH	train	56	890	3.2098	2.8932	1.2388	1.1949	1.0295	1.0169	0.9843	0.9733	0.9541	0.9444	0.9324	0.9269	0.9236	0.923	0.9228
pdb|1ajsB02	CATH	train	126	1392	11.9186	9.132	3.503	2.7729	1.8182	1.5615	1.3039	1.2002	1.1089	1.0591	1.0196	0.9976	0.9824	0.972	0.9657
pdb|1ak0A00	CATH	train	114	1702	6.2324	5.3722	1.645	1.5647	1.1229	1.1239	1.0427	1.0544	1.0394	1.05	1.0525	1.0623	1.0708	1.0822	1.0925
pdb|1akoA00	CATH	test	124	2156	6.5877	5.5616	1.7015	1.5549	1.1256	1.1188	1.0412	1.0527	1.0403	1.0528	1.0537	1.0629	1.07	1.0762	1.088
pdb|1akpA00	CATH	train	39	662	1.7957	1.94	1.0225	1.0643	0.9937	0.9959	0.9865	0.983	0.9768	0.9707	0.9636	0.9551	0.9477	0.9412	0.9354
pdb|1al3A01	CATH	train	55	800	4.4608	3.4426	1.5757	1.3795	1.1261	1.0777	1.022	1.0078	0.9921	0.9874	0.9838	0.9825	0.9822	0.9821	0.982
pdb|1al3A02	CATH	train	63	984	4.1151	3.1823	1.3607	1.2245	1.0496	1.0183	0.9882	0.9784	0.9688	0.9617	0.9549	0.9487	0.9438	0.9388	0.9334
pdb|1aluA00	CATH	test	82	1270	5.2544	4.1352	1.5263	1.4296	1.1125	1.1018	1.044	1.0447	1.0314	1.0363	1.0317	1.0357	1.0349	1.0367	1.0371
pdb|1alyA00	CATH	train	67	1358	2.7907	2.8015	1.1191	1.1746	1.0222	1.0448	1.0282	1.0391	1.0385	1.0423	1.0429	1.0436	1.0437	1.0439	1.0439
pdb|1am2A00	CATH	train	95	1658	5.4909	4.0177	1.4353	1.3571	1.0871	1.0974	1.0588	1.0718	1.0705	1.074	1.0738	1.0738	1.0738	1.0738	1.0738
pdb|1am7A00	CATH	train	77	1724	2.9044	2.72	1.0823	1.1128	0.9707	0.9705	0.932	0.9302	0.9188	0.9188	0.9182	0.9182	0.9182	0.9182	0.9182
pdb|1am9B00	CATH	test	50	1240	1.7903	1.8255	1.0047	1.0467	0.9884	0.9931	0.964	0.9557	0.9384	0.932	0.9249	0.9266	0.9243	0.9272	0.9249
pdb|1amlA00	CATH	train	18	218	1.1756	1.3694	0.974	1.0219	0.9969	1.0032	1.0023	1.0024	1.0022	1.0022	1.0022	1.0022	1.0022	1.0022	1.0022
pdb|1amxA00	CATH	train	64	954	3.312	3.4376	1.2351	1.3455	1.0333	1.0642	0.9959	0.9977	0.9766	0.9757	0.9685	0.968	0.9653	0.9649	0.9648
pdb|1an4A00	CATH	train	32	504	1.76	1.7864	1.035	1.0493	1.0041	1.0083	1.0048	1.0068	1.0057	1.007	1.0066	1.0075	1.0066	1.0076	1.0066
pdb|1an9A01	CATH	test	83	810	7.4399	5.8456	2.3527	2.0647	1.4268	1.331	1.1568	1.1207	1.0636	1.053	1.0303	1.0259	1.0197	1.0184	1.0159
pdb|1an9A02	CATH	train	64	886	4.1679	3.5232	1.3945	1.2892	1.0685	1.0526	1.0255	1.0305	1.0272	1.0385	1.0437	1.0559	1.061	1.0678	1.0702
pdb|1anfA01	CATH	train	83	1160	5.2864	3.986	1.4299	1.3416	1.0701	1.0628	1.0263	1.0291	1.0249	1.0261	1.0261	1.0274	1.0286	1.0305	1.0313
pdb|1anfA02	CATH	train	91	1476	4.9516	3.9767	1.3733	1.3221	1.0377	1.0272	0.9657	0.9527	0.9308	0.924	0.9151	0.9133	0.9116	0.9116	0.9116
pdb|1anvA02	CATH	test	81	1612	2.9669	2.9505	1.1098	1.156	1.019	1.0472	1.0457	1.0671	1.0803	1.0984	1.1171	1.1315	1.1448	1.1525	1.1568
pdb|1aoaA02	CATH	train	67	1498	2.4985	2.4426	1.0524	1.1111	1.0066	1.039	1.0226	1.0489	1.0466	1.0645	1.0669	1.0753	1.078	1.0814	1.0832
pdb|1aocA00	CATH	train	82	1710	4.5817	3.4861	1.3475	1.2185	1.0208	0.9864	0.9477	0.9293	0.9214	0.9192	0.9189	0.9186	0.9186	0.9186	0.9186
pdb|1aoeA00	CATH	train	89	1934	4.1805	3.1929	1.217	1.209	1.0467	1.0796	1.0732	1.1014	1.1139	1.1417	1.155	1.1758	1.179	1.1896	1.1901
pdb|1aohB00	CATH	test	66	1760	1.8986	2.0328	0.983	1.0391	0.9731	0.9715	0.9634	0.9632	0.9632	0.9632	0.9632	0.9632	0.9632	0.9632	0.9632
pdb|1aolA00	CATH	train	91	2032	4.3357	3.5029	1.2385	1.2961	1.0037	1.015	0.945	0.9315	0.9073	0.8944	0.8799	0.8694	0.8573	0.8467	0.8397
pdb|1aooA00	CATH	train	11	82	0.6318	1.2919	0.8731	1.0683	0.968	1.0193	0.9953	1.0052	0.9997	1.0005	0.9979	0.9966	0.9954	0.9948	0.9931
pdb|1aopA01	CATH	train	96	466	13.5515	12.6954	6.2477	5.7063	4.0545	3.7284	3.0921	2.8833	2.5788	2.437	2.2668	2.1689	2.0615	1.9872	1.9162
pdb|1aopA02	CATH	test	80	656	7.4645	7.3296	2.7444	2.4596	1.6326	1.5	1.2719	1.2091	1.1305	1.0965	1.0651	1.0513	1.041	1.0374	1.035
pdb|1aopA03	CATH	train	60	632	3.6749	3.7219	1.3637	1.3769	1.0733	1.0701	1.0109	1.001	0.9848	0.979	0.9703	0.9666	0.9639	0.9636	0.9636
pdb|1aorA03	CATH	train	113	1062	11.7279	9.2671	3.4752	2.7511	1.7781	1.5248	1.278	1.1806	1.1043	1.0639	1.036	1.0168	1.0036	0.9919	0.9821
pdb|1aoyA00	CATH	train	41	482	2.8785	2.8476	1.2273	1.2463	1.0375	1.0458	1.0087	1.0115	1.0026	1.0036	1.0013	1.0021	1.0007	1.0017	1.0007
pdb|1aozA01	CATH	test	51	616	3.0006	2.9192	1.1323	1.2362	1.0137	1.0357	0.9924	0.9944	0.9779	0.9765	0.9685	0.9664	0.962	0.9601	0.9571
pdb|1aozA02	CATH	train	97	964	9.4339	8.0993	3.2404	2.7776	1.879	1.6694	1.406	1.3063	1.2106	1.1629	1.1186	1.0933	1.0707	1.0565	1.0434
pdb|1aozA03	CATH	train	87	1166	4.7498	4.2538	1.3314	1.4226	1.0314	1.0766	0.9826	0.9872	0.9528	0.9545	0.9411	0.9438	0.9371	0.9385	0.9371
pdb|1ap8A00	CATH	train	93	1462	5.0722	4.5365	1.532	1.4426	1.1011	1.0719	0.9945	0.9756	0.945	0.9302	0.9211	0.9185	0.9178	0.9178	0.9178
pdb|1apjA00	CATH	test	45	814	2.37	2.3839	1.0637	1.1335	1.0008	1.0109	0.9915	0.9907	0.9896	0.9892	0.9892	0.9892	0.9892	0.9892	0.9892
pdb|1apr002	CATH	train	40	728	1.3825	1.8981	0.9194	1.0832	0.9752	0.9993	0.9791	0.9821	0.9715	0.9722	0.9651	0.9659	0.9609	0.9603	0.9599
pdb|1aq5A00	CATH	train	23	256	1.6654	1.669	1.0243	1.0483	1.0009	1.0061	1.0022	1.0048	1.0061	1.008	1.0097	1.0118	1.0138	1.0172	1.0193
pdb|1aqcA00	CATH	train	81	584	10.0502	8.8209	4.3185	3.5666	2.5627	2.1933	1.8259	1.6323	1.464	1.358	1.2712	1.2107	1.1624	1.128	1.0981
pdb|1aqsA00	CATH	test	16	156	0.7264	1.3509	0.8531	1.079	0.9565	1.0207	0.9889	1.0031	0.9913	0.9946	0.9882	0.9888	0.9851	0.9865	0.9842
pdb|1aqzA00	CATH	train	69	430	9.4318	8.8826	4.4558	3.9373	2.9108	2.5808	2.2034	2.007	1.8259	1.7059	1.6036	1.5264	1.4612	1.4112	1.3678
pdb|1arbA01	CATH	train	44	428	3.3926	3.4956	1.5167	1.4921	1.1653	1.1387	1.0593	1.0425	1.0207	1.0123	1.0049	1.0011	0.9983	0.9975	0.9966
pdb|1arbA02	CATH	train	42	522	2.2671	2.6266	1.0562	1.2667	0.9739	1.0632	0.9814	1.0098	0.9778	0.9891	0.9745	0.9796	0.971	0.9736	0.9694
pdb|1aroP02	CATH	test	24	282	1.6729	1.6111	1.037	1.0384	1.0014	1.001	0.997	0.9948	0.9932	0.9918	0.9882	0.9882	0.9871	0.9864	0.9867
pdb|1aroP05	CATH	train	104	706	13.2244	11.0618	4.967	4.0329	2.7416	2.2979	1.867	1.6473	1.465	1.3507	1.2624	1.2016	1.1548	1.1206	1.0942
pdb|1arsA01	CATH	train	55	598	4.0932	3.5681	1.4888	1.3591	1.112	1.065	1.0207	1.0042	0.9928	0.9864	0.981	0.9774	0.9733	0.9716	0.9704
pdb|1as4A01	CATH	train	52	716	2.8125	2.7035	1.1254	1.1619	1.0154	1.0248	1.0095	1.0143	1.0106	1.0148	1.0146	1.0168	1.0169	1.0177	1.0189
pdb|1ashA00	CATH	test	79	992	6.9993	5.4809	2.1758	1.771	1.3134	1.1868	1.0909	1.0498	1.0254	1.0133	1.006	1.0018	0.9992	0.9986	0.998
pdb|1at0A00	CATH	train	64	1054	2.9994	2.9671	1.1749	1.1784	1.0228	1.0182	1.0004	1.0009	0.9996	1.0006	0.9999	1.0009	1.0001	1.0011	1.0002
pdb|1at3A00	CATH	train	99	1384	5.2336	4.3552	1.4068	1.6174	1.0522	1.192	1.016	1.095	1.0328	1.0859	1.058	1.0936	1.0821	1.1126	1.111
pdb|1atgA01	CATH	train	46	880	1.7362	2.0167	1.0031	1.0737	0.9905	0.9977	0.9772	0.9714	0.9628	0.9575	0.9544	0.9509	0.9485	0.9481	0.9485
pdb|1atgA02	CATH	test	39	738	1.4785	1.7597	0.948	1.0657	0.9859	1.0089	0.9987	1.0016	1.0008	1.0008	1.0008	1.0008	1.0008	1.0008	1.0008
pdb|1atiB01	CATH	train	152	1370	16.8093	12.305	4.9255	3.8462	2.3858	2.0112	1.561	1.405	1.2353	1.1641	1.0901	1.0541	1.0233	1.0057	0.9906
pdb|1atiB02	CATH	train	53	910	2.5988	2.2026	1.0165	1.109	0.9799	1.0014	0.9718	0.9764	0.9666	0.9662	0.9615	0.9609	0.9571	0.9568	0.9556
pdb|1atxA00	CATH	train	13	118	0.9155	1.2957	0.9687	1.0306	0.9954	1.0037	0.9973	0.9986	0.9954	0.9957	0.9944	0.9947	0.9942	0.9943	0.9941
pdb|1atzB00	CATH	test	75	418	8.5936	8.018	3.8595	3.7162	2.7008	2.5513	2.1669	2.0449	1.8571	1.7636	1.6545	1.5839	1.5115	1.4578	1.4085
pdb|1au7A02	CATH	train	27	230	2.9649	2.5872	1.4149	1.251	1.095	1.0505	1.0211	1.0089	1.0011	0.9981	0.9962	0.9955	0.9953	0.9952	0.9952
pdb|1auaA01	CATH	train	94	598	10.5859	9.2124	3.7628	3.3913	2.2334	2.0253	1.6443	1.5238	1.3644	1.2937	1.2148	1.1737	1.1318	1.1062	1.0824
pdb|1auaA02	CATH	train	39	440	3.1633	2.9503	1.329	1.2557	1.0633	1.0457	1.0145	1.0131	1.0069	1.0111	1.0086	1.0123	1.0112	1.0138	1.0132
pdb|1auiB00	CATH	test	87	788	9.6275	8.0017	3.6227	2.9313	2.1013	1.8057	1.5422	1.4032	1.2968	1.2296	1.1785	1.1432	1.1179	1.0993	1.0833
pdb|1aukA01	CATH	train	145	1382	9.5967	8.3343	2.4121	2.5568	1.4187	1.4854	1.1514	1.1713	1.0541	1.0533	1.0077	1.0024	0.9814	0.9761	0.9618
pdb|1aukA02	CATH	train	51	764	2.8807	2.824	1.1973	1.1665	1.0239	1.0125	0.9894	0.9788	0.971	0.967	0.9619	0.9578	0.9543	0.9521	0.9492
pdb|1auoA00	CATH	train	98	1100	7.2261	5.4728	2.0112	1.8284	1.267	1.2177	1.0689	1.0512	0.9946	0.9867	0.9647	0.9594	0.9491	0.9487	0.9459
pdb|1autL01	CATH	test	29	410	1.7205	1.7908	1.0442	1.0535	1.0063	1.0097	1.0076	1.0125	1.0163	1.0196	1.0234	1.028	1.0294	1.0299	1.0299
pdb|1auuA00	CATH	train	26	378	1.3863	1.5418	1.0216	1.0316	1.0049	1.009	1.0085	1.0112	1.012	1.0141	1.0136	1.0135	1.0131	1.0124	1.0107
pdb|1avaC00	CATH	train	81	702	7.5864	5.8694	2.4201	2.0664	1.4642	1.3403	1.1793	1.1246	1.0728	1.0493	1.0268	1.0133	1.0037	0.9968	0.9892
pdb|1avbA00	CATH	train	118	1170	11.1561	9.2989	3.5801	2.8419	1.8663	1.5938	1.3337	1.227	1.1425	1.0991	1.069	1.0502	1.0373	1.0306	1.0262
pdb|1avcA07	CATH	test	48	670	3.3191	2.7398	1.2535	1.1664	1.0281	1.0079	0.9832	0.9738	0.9656	0.9636	0.9624	0.9624	0.9624	0.9624	0.9624
pdb|1avgI00	CATH	train	73	918	6.3797	4.9107	1.9301	1.6606	1.2309	1.1603	1.0718	1.0485	1.0243	1.0175	1.0114	1.0081	1.0063	1.0058	1.0045
pdb|1avoA00	CATH	train	33	568	1.6878	1.738	1.0485	1.0513	1.0129	1.0198	1.0197	1.0247	1.0278	1.0311	1.033	1.0335	1.0338	1.0338	1.0338
pdb|1avoB00	CATH	train	74	820	7.9087	5.6639	2.6095	2.0418	1.5022	1.3183	1.1659	1.0963	1.0404	1.0116	0.9897	0.979	0.9704	0.9659	0.9618
pdb|1avqA00	CATH	test	108	1244	9.8696	7.3549	2.9945	2.2761	1.6284	1.4033	1.2437	1.1636	1.1129	1.0827	1.0636	1.0517	1.0431	1.037	1.0331
pdb|1avvA00	CATH	train	54	928	2.4244	2.2396	1.0226	1.112	0.9884	1.0218	1.0008	1.0123	1.0079	1.0104	1.0104	1.0104	1.0104	1.0104	1.0104
pdb|1avwB00	CATH	train	86	1234	6.343	4.782	1.884	1.5819	1.2344	1.1513	1.0872	1.0686	1.0564	1.0554	1.0548	1.0571	1.0586	1.0601	1.062
pdb|1avyA00	CATH	train	36	720	1.5438	1.5789	1.0035	1.0276	1.0111	1.0185	1.0194	1.0194	1.0194	1.0194	1.0194	1.0194	1.0194	1.0194	1.0194
pdb|1avyB00	CATH	test	27	504	1.2146	1.3392	0.9865	1.0133	0.9961	1.0001	0.9987	0.9989	0.9989	0.9989	0.9989	0.9989	0.9989	0.9989	0.9989
pdb|1aw7A01	CATH	train	58	700	5.2671	4.4356	2.0817	1.789	1.3875	1.2646	1.1524	1.0986	1.0594	1.0367	1.0209	1.0101	1.0035	0.9985	0.9957
pdb|1aw9A01	CATH	train	43	704	2.408	2.0612	1.0799	1.0785	1.0004	1.0013	0.9865	0.9827	0.9794	0.9761	0.9751	0.9739	0.973	0.9721	0.9715
pdb|1aw9A02	CATH	train	52	822	1.934	1.9914	0.8589	1.1714	0.9276	1.0522	0.9708	1.024	0.99	1.0116	0.9945	1.0034	0.997	1	0.9978
pdb|1awcB00	CATH	test	72	1064	5.5765	3.8543	1.5426	1.3154	1.0858	1.0488	1.0183	1.0125	1.007	1.0065	1.0059	1.0056	1.0053	1.0054	1.0053
pdb|1awjA00	CATH	train	34	678	1.3797	1.4933	0.9849	1.0236	0.9987	1.0036	1.0022	1.0063	1.007	1.0119	1.0129	1.0156	1.018	1.0191	1.0198
pdb|1awwA00	CATH	train	33	684	1.3636	1.4732	0.9835	1.0288	1.0073	1.019	1.0211	1.0268	1.0279	1.0285	1.0306	1.0312	1.0318	1.0318	1.0318
pdb|1ax8A00	CATH	train	68	902	6.2143	4.1642	1.8166	1.4603	1.1782	1.0974	1.0455	1.0238	1.0112	1.0061	1.0007	0.999	0.9977	0.9962	0.9954
pdb|1axiB01	CATH	test	51	936	3.1385	2.6087	1.2159	1.1548	1.0274	1.0221	1.0047	1.0058	1.0002	0.9994	0.9986	0.9985	0.9983	0.9981	0.9981
pdb|1axiB02	CATH	train	54	1054	2.3189	2.153	1.0153	1.1116	1.0041	1.0443	1.0327	1.0475	1.0451	1.0526	1.0524	1.054	1.054	1.054	1.054
pdb|1ay7B00	CATH	train	43	944	1.6576	1.6657	1.0105	1.0257	0.9854	0.9844	0.9665	0.9543	0.9443	0.9351	0.9325	0.9324	0.9324	0.9324	0.9324
pdb|1ayaA00	CATH	train	53	1058	2.9362	2.2193	1.1222	1.0838	1.0253	1.0263	1.0259	1.0256	1.0256	1.0256	1.0256	1.0256	1.0256	1.0256	1.0256
pdb|1ayjA00	CATH	test	21	326	1.0527	1.262	0.9783	1.0121	0.9974	1.0041	1.0063	1.0117	1.016	1.02	1.0245	1.0279	1.0296	1.0307	1.0308
pdb|1aym100	CATH	train	122	834	14.2933	13.242	6.3131	5.7129	4.1453	3.7322	3.1642	2.8954	2.6192	2.4377	2.2737	2.1467	2.0349	1.9422	1.8572
pdb|1aym200	CATH	train	101	1072	7.1146	7.0983	2.4853	2.4004	1.5701	1.507	1.2744	1.2312	1.149	1.1177	1.0806	1.0601	1.0395	1.0241	1.0053
pdb|1aym300	CATH	train	83	1124	4.8206	4.8125	1.633	1.5636	1.1382	1.1049	1.0138	0.9966	0.9683	0.9608	0.9449	0.9347	0.919	0.9115	0.9042
pdb|1aym400	CATH	test	18	238	1.0785	1.3272	0.9717	1.0224	0.9957	1.0054	1.0003	1.0031	1.003	1.0032	1.0032	1.0032	1.0032	1.0032	1.0032
pdb|1ayoA00	CATH	train	62	482	6.7434	5.1304	2.2417	1.8908	1.3947	1.2724	1.1456	1.1	1.0613	1.0449	1.0325	1.0281	1.0244	1.0233	1.0225
pdb|1azoA00	CATH	train	97	866	8.3053	6.9972	2.5768	2.302	1.5179	1.4111	1.2011	1.1549	1.0894	1.0696	1.0481	1.0408	1.0331	1.0314	1.029
pdb|1azsA00	CATH	train	108	1268	8.5416	7.4202	2.5803	2.2144	1.4785	1.3464	1.1648	1.1102	1.0565	1.0346	1.0187	1.0113	1.0049	1.0019	1.0003
pdb|1azsB00	CATH	test	101	1522	5.6956	5.4894	1.894	1.6701	1.2527	1.1802	1.0983	1.0726	1.0524	1.0437	1.0342	1.0262	1.0203	1.0165	1.0122
pdb|1aztB02	CATH	train	64	1054	2.9845	2.8484	1.1415	1.1702	1.015	1.0146	0.9917	0.9918	0.9819	0.9816	0.9782	0.9775	0.9767	0.9763	0.976
pdb|1b04A03	CATH	train	33	474	1.9905	1.7997	1.027	1.0476	1.0006	1.0048	1	1.0017	1.0002	1.0015	1.0002	1.0018	1.001	1.002	1.0019
pdb|1b0bA00	CATH	train	66	686	5.6416	4.1204	1.6328	1.4797	1.1328	1.1033	1.0353	1.029	1.014	1.0136	1.0095	1.0084	1.0084	1.0084	1.0084
pdb|1b0nA00	CATH	test	57	802	3.9099	3.1733	1.3504	1.2262	1.0525	1.0324	1.0119	1.0105	1.0086	1.009	1.009	1.0091	1.0091	1.0091	1.0091
pdb|1b0nB00	CATH	train	29	468	1.671	1.5561	0.9988	1.0407	0.9977	0.9991	0.9941	0.994	0.994	0.994	0.994	0.994	0.994	0.994	0.994
pdb|1b0uA00	CATH	train	106	912	10.6873	8.1021	3.3754	2.683	1.7983	1.5451	1.2973	1.1994	1.1175	1.0773	1.0471	1.0316	1.0204	1.0117	1.0039
pdb|1b0zA01	CATH	train	115	1378	9.4931	8.009	3.0673	2.3781	1.6305	1.4034	1.2222	1.1482	1.0957	1.0705	1.056	1.0493	1.0462	1.0436	1.0425
pdb|1b12A02	CATH	test	27	450	1.2017	1.4612	1.0002	1.0266	1	1.0013	0.9991	0.9994	0.9989	0.9994	0.9989	0.9994	0.9989	0.9994	0.9989
pdb|1b12B01	CATH	train	65	678	6.7652	4.8627	2.2949	1.7986	1.4001	1.2489	1.1436	1.0909	1.053	1.031	1.012	1.0015	0.9884	0.9828	0.9743
pdb|1b22A00	CATH	train	49	696	3.3971	2.7536	1.283	1.1999	1.0441	1.0273	1.0009	0.9985	0.993	0.9924	0.9924	0.9924	0.9924	0.9924	0.9924
pdb|1b24A02	CATH	train	38	624	2.0606	1.8753	1.0618	1.0662	1.011	1.0155	1.0114	1.0142	1.0164	1.0184	1.0213	1.0235	1.0235	1.0237	1.0236
pdb|1b25A01	CATH	test	84	922	6.813	4.9932	1.9999	1.7131	1.2343	1.1665	1.0514	1.0273	0.9852	0.974	0.9521	0.9434	0.9291	0.922	0.908
pdb|1b25A02	CATH	train	78	1138	4.9861	4.2191	1.6048	1.4232	1.1283	1.0836	1.039	1.0309	1.0236	1.0233	1.0229	1.0238	1.0245	1.0257	1.0262
pdb|1b25A03	CATH	train	97	1474	6.139	4.7948	1.6569	1.4375	1.1028	1.055	0.9952	0.9799	0.9694	0.9679	0.9672	0.9672	0.9672	0.9672	0.9672
pdb|1b2pA00	CATH	train	48	924	1.8999	2.0153	1.0306	1.0634	0.9912	0.9874	0.9735	0.9646	0.9561	0.9492	0.9402	0.9329	0.9264	0.9218	0.9178
pdb|1b34A00	CATH	test	41	874	1.4553	1.6171	0.9631	1.0448	0.9965	1.0191	1.0131	1.0195	1.0191	1.0209	1.0212	1.0212	1.0212	1.0212	1.0212
pdb|1b34B00	CATH	train	45	960	1.9298	1.7836	1.0338	1.0383	0.994	0.9907	0.9874	0.9872	0.9872	0.9872	0.9872	0.9872	0.9872	0.9872	0.9872
pdb|1b35A00	CATH	train	104	1358	9.0658	6.8669	2.7184	2.1854	1.519	1.3343	1.1657	1.0974	1.0454	1.0191	0.9985	0.9877	0.9806	0.9775	0.9756
pdb|1b35B00	CATH	train	100	1688	5.3282	4.7127	1.6001	1.4494	1.1267	1.0923	1.0431	1.0424	1.0355	1.0438	1.0519	1.0624	1.0779	1.099	1.1148
pdb|1b35C00	CATH	test	137	2234	9.7824	7.2465	2.3058	1.8807	1.2934	1.1977	1.0954	1.0775	1.0568	1.0651	1.0624	1.0793	1.0885	1.1108	1.1213
pdb|1b35D00	CATH	train	23	394	1.0557	1.2442	0.9823	1.012	0.9978	1.0001	0.9978	0.9993	0.9973	0.9984	0.9973	0.9972	0.9968	0.9972	0.9968
pdb|1b37A01	CATH	train	127	914	17.8488	15.6019	8.0021	6.679	4.9684	4.2927	3.6678	3.3	2.9939	2.7733	2.5919	2.4442	2.3251	2.2197	2.1325
pdb|1b3aA00	CATH	train	33	454	2.3608	2.0875	1.2218	1.1455	1.0521	1.0326	1.0185	1.0151	1.0132	1.0128	1.0126	1.0124	1.0115	1.0109	1.0107
pdb|1b3oA00	CATH	test	140	1020	14.8133	12.3746	5.2965	4.5965	3.1084	2.7324	2.2376	2.026	1.8101	1.679	1.5604	1.4757	1.402	1.3458	1.2974
pdb|1b3qA01	CATH	train	34	520	2.3296	2.0086	1.16	1.085	1.0171	1.0078	1.0012	1.001	1.0006	1.002	1.0016	1.0023	1.0016	1.0023	1.0016
pdb|1b3qA04	CATH	train	28	484	1.4013	1.4076	1.0072	1.0143	1.0034	1.0054	1.0056	1.0056	1.0056	1.0056	1.0056	1.0056	1.0056	1.0056	1.0056
pdb|1b3qB03	CATH	train	22	378	0.8183	1.2466	0.9396	1.025	0.9911	1.0051	1.0042	1.0089	1.0118	1.0183	1.02	1.0295	1.0345	1.041	1.0453
pdb|1b3tA00	CATH	test	59	604	6.3531	4.8077	2.2846	1.7746	1.3801	1.2297	1.1364	1.09	1.0653	1.0531	1.0467	1.0438	1.0422	1.0411	1.0407
pdb|1b3uA00	CATH	train	265	1764	25.3515	20.6476	7.8435	7.3677	4.2975	4.1499	2.9573	2.8661	2.2951	2.2276	1.919	1.8536	1.6715	1.6163	1.505
pdb|1b43A02	CATH	train	30	462	1.5035	1.5239	0.9835	1.0371	0.9923	1.0076	1.001	1.0053	1.0046	1.0056	1.0056	1.0056	1.0056	1.0056	1.0056
pdb|1b4aA01	CATH	train	34	518	2.1778	1.8845	1.1182	1.0726	1.0168	1.0085	1.0031	1.0039	1.0015	1.0036	1.0015	1.0036	1.0015	1.0036	1.0015
pdb|1b4bA00	CATH	test	32	550	1.4878	1.5614	1.0024	1.0342	1.0039	1.0125	1.0123	1.0187	1.0195	1.0234	1.0242	1.0278	1.0288	1.0304	1.0305
pdb|1b4fA00	CATH	train	44	666	3.1511	2.4066	1.2345	1.1195	1.0247	1.0005	0.9848	0.9791	0.9775	0.9774	0.9774	0.9774	0.9774	0.9774	0.9774
pdb|1b4pA01	CATH	train	55	840	3.7608	2.8104	1.2901	1.1569	1.0342	1.0135	0.9939	0.9897	0.9798	0.9742	0.9666	0.9603	0.9513	0.9453	0.9389
pdb|1b4rA00	CATH	train	36	694	1.2797	1.5472	0.9664	1.0384	0.9875	1.0013	0.9945	0.9977	0.9953	0.9975	0.9954	0.9978	0.9955	0.9978	0.9955
pdb|1b4uA00	CATH	test	66	914	6.4687	4.4519	2.0978	1.5986	1.2816	1.1676	1.1067	1.0825	1.0731	1.0706	1.0693	1.0683	1.0669	1.0669	1.0666
pdb|1b4uB00	CATH	train	108	1322	6.5863	4.9923	1.6284	1.6394	1.1128	1.1372	1.0157	1.0187	0.9784	0.977	0.9544	0.9497	0.9356	0.9287	0.92
pdb|1b5eA00	CATH	train	116	1750	6.9835	5.2147	1.757	1.5053	1.1471	1.1125	1.0643	1.0698	1.0744	1.0897	1.1072	1.1245	1.1474	1.1621	1.1812
pdb|1b5fB00	CATH	train	38	828	1.4086	1.5072	0.9989	1.0229	1.0022	1.0066	1.0041	1.0055	1.0062	1.0062	1.0069	1.0071	1.0073	1.0075	1.0079
pdb|1b5fC00	CATH	test	95	1192	9.1334	7.1339	3.0632	2.4552	1.7467	1.5189	1.3154	1.2159	1.1352	1.0861	1.0461	1.0174	0.9931	0.976	0.9559
pdb|1b5lA00	CATH	train	88	1426	5.8572	4.7824	1.8173	1.5082	1.1816	1.1026	1.0502	1.0317	1.0215	1.0171	1.0162	1.0159	1.0151	1.015	1.0146
pdb|1b63A01	CATH	train	99	1730	4.716	3.8215	1.3266	1.2887	1.0551	1.0716	1.0493	1.071	1.0781	1.1007	1.1171	1.1415	1.1569	1.1741	1.1871
pdb|1b63A02	CATH	train	51	1112	2.0156	1.8752	1.0126	1.0426	0.9911	0.9932	0.9878	0.9873	0.9856	0.9854	0.9845	0.9852	0.9845	0.9852	0.9845
pdb|1b65A00	CATH	test	135	1644	9.6428	7.4106	2.6567	2.4472	1.5168	1.4753	1.1948	1.1769	1.0799	1.071	1.0346	1.0316	1.0176	1.0163	1.0134
pdb|1b67A00	CATH	train	36	860	1.2397	1.3411	0.9845	1.0016	0.9874	0.9837	0.9796	0.9731	0.9646	0.9618	0.9606	0.9601	0.9589	0.9588	0.9588
pdb|1b69A00	CATH	train	39	914	1.7887	1.589	1.0514	1.041	1.0174	1.0229	1.0342	1.0438	1.0548	1.0633	1.0666	1.0672	1.0674	1.0674	1.0674
pdb|1b6aA01	CATH	train	122	1422	13.661	10.019	4.3985	3.2423	2.2321	1.8116	1.5176	1.3531	1.2448	1.1777	1.1336	1.1055	1.088	1.0743	1.0675
pdb|1b6aA02	CATH	test	43	1018	1.5596	1.5426	0.9888	1.0249	0.9967	1.0018	0.9933	0.99	0.9785	0.977	0.9716	0.9706	0.9673	0.9679	0.9679
pdb|1b6cB01	CATH	train	50	1104	1.9302	1.8118	0.9946	1.074	1.0019	1.0284	1.0199	1.0338	1.034	1.0443	1.0469	1.0538	1.0572	1.0617	1.0631
pdb|1b6gA00	CATH	train	135	1632	11.6878	7.662	2.8784	2.2431	1.4962	1.3117	1.1237	1.0511	0.988	0.9578	0.9292	0.9161	0.9018	0.8954	0.8846
pdb|1b6rA01	CATH	train	27	546	0.8566	1.2222	0.9534	1.0184	0.9904	1.004	0.9971	1.001	1.0006	1.0008	1.0008	1.0008	1.0008	1.0008	1.0008
pdb|1b6rA02	CATH	test	97	936	8.685	6.042	2.3767	2.1616	1.4033	1.3996	1.1468	1.1551	1.049	1.0521	0.9988	0.9983	0.9702	0.9712	0.9534
pdb|1b6rA03	CATH	train	28	558	1.0528	1.2594	0.9761	1.0166	0.9986	1.0067	1.0022	1.007	1.0031	1.0075	1.0035	1.0075	1.0035	1.0075	1.0035
pdb|1b72A00	CATH	train	64	786	7.7337	5.7479	3.0189	2.3693	1.8855	1.6491	1.4868	1.3762	1.2959	1.236	1.1896	1.1524	1.1244	1.1007	1.0815
pdb|1b73A01	CATH	train	78	1062	5.9473	4.4988	1.7306	1.4763	1.1453	1.097	1.0392	1.0314	1.0185	1.0193	1.0169	1.0203	1.022	1.0276	1.0324
pdb|1b79B00	CATH	test	52	946	2.5255	2.2035	1.0958	1.0755	1.0132	1.0122	1.01	1.01	1.01	1.01	1.01	1.01	1.01	1.01	1.01
pdb|1b7yA00	CATH	train	124	1424	8.3711	5.4881	1.8429	1.7862	1.136	1.1982	1.0005	1.0395	0.9558	0.9782	0.933	0.9444	0.9209	0.9257	0.9116
pdb|1b7yB01	CATH	train	34	708	1.1945	1.3755	0.9606	1.0343	1.0067	1.0286	1.035	1.0484	1.0552	1.0624	1.0644	1.0697	1.0702	1.0704	1.0704
pdb|1b7yB02	CATH	train	44	782	1.922	1.8913	0.967	1.1128	0.9717	1.0174	0.982	0.9945	0.9824	0.9865	0.9815	0.9826	0.9809	0.9812	0.9808
pdb|1b7yB03	CATH	test	94	1116	6.2558	4.2479	1.5597	1.6243	1.1135	1.2077	1.0476	1.1037	1.0463	1.0843	1.0629	1.0895	1.0823	1.1028	1.1042
pdb|1b7yB04	CATH	train	38	812	1.7066	1.6151	1.0225	1.0399	1.0105	1.0271	1.0341	1.0427	1.0502	1.0563	1.0572	1.0577	1.0578	1.0578	1.0578
pdb|1b7yB05	CATH	train	88	1112	6.1584	4.0941	1.495	1.4499	1.0796	1.0842	0.9941	0.9902	0.9571	0.9542	0.9364	0.9338	0.9267	0.9252	0.9215
pdb|1b7yB06	CATH	train	40	890	1.2679	1.5352	0.9357	1.0616	0.9974	1.039	1.0308	1.0496	1.0476	1.0578	1.0556	1.0602	1.06	1.0604	1.0604
pdb|1b89A00	CATH	test	166	1606	16.6806	11.8932	4.6911	3.5564	2.2129	1.8504	1.4722	1.342	1.2174	1.1689	1.1284	1.1141	1.1025	1.1009	1.0996
pdb|1b8aA02	CATH	train	161	2196	10.4299	7.9845	2.4612	1.9767	1.2989	1.1741	1.0335	0.99	0.9483	0.9285	0.914	0.9053	0.8982	0.8922	0.8888
pdb|1b8iA00	CATH	train	39	926	1.4336	1.5419	0.9994	1.0278	1.0028	1.0057	1.0045	1.0039	1.0034	1.0032	1.0031	1.0031	1.0031	1.0031	1.0031
pdb|1b8iB00	CATH	train	34	836	1.2632	1.3264	0.995	1.0029	0.9806	0.9717	0.9685	0.9678	0.9678	0.9678	0.9678	0.9678	0.9678	0.9678	0.9678
pdb|1b8tA01	CATH	test	26	534	1.0428	1.224	0.9772	1.0114	1.0019	1.0104	1.0077	1.0119	1.0096	1.0122	1.0097	1.0123	1.0098	1.0123	1.0098
pdb|1b8tA02	CATH	train	33	574	2.1128	1.7041	1.0797	1.0466	1.0004	0.9958	0.9856	0.9835	0.9802	0.9801	0.9812	0.9819	0.9815	0.9829	0.9826
pdb|1b8wA00	CATH	train	21	352	1.0351	1.1777	0.988	1.0021	0.9943	0.9941	0.9918	0.9908	0.9907	0.9907	0.9907	0.9907	0.9907	0.9907	0.9907
pdb|1b8xA03	CATH	train	23	366	1.2616	1.2998	1.0032	1.0139	1.0017	1.0033	1.0025	1.0053	1.0045	1.0073	1.0069	1.0094	1.0089	1.0113	1.0114
pdb|1b93C00	CATH	test	58	560	4.9084	3.9544	1.7653	1.6465	1.2693	1.2181	1.1191	1.0959	1.0638	1.0555	1.0441	1.0413	1.0384	1.0389	1.0401
pdb|1b9hA02	CATH	train	64	776	4.4671	3.422	1.4061	1.3181	1.0763	1.0654	1.0224	1.021	1.0146	1.0154	1.0144	1.0173	1.0172	1.0196	1.0196
pdb|1b9lA00	CATH	train	70	1000	4.8118	3.5385	1.431	1.2575	1.0599	1.0329	1.0085	1.0069	1.0042	1.0037	1.0036	1.0036	1.0036	1.0036	1.0036
pdb|1b9mA03	CATH	train	27	450	1.146	1.3825	0.9738	1.0279	0.9967	1.0082	1.002	1.0086	1.0049	1.0094	1.0071	1.0094	1.0076	1.0094	1.0085
pdb|1b9mB01	CATH	test	51	614	4.9148	3.5468	1.6965	1.3818	1.15	1.0754	1.0299	1.009	0.9947	0.9888	0.9841	0.9809	0.9767	0.9723	0.9671
pdb|1b9mB02	CATH	train	36	582	1.8882	1.8731	1.0449	1.0744	0.9922	1.0034	0.9849	0.9881	0.983	0.9832	0.9828	0.9828	0.9828	0.9828	0.9828
pdb|1b9oA00	CATH	train	56	764	4.1407	3.2403	1.39	1.3335	1.0865	1.0802	1.0246	1.0209	1.0047	1.0031	0.998	0.9963	0.9931	0.9909	0.9889
pdb|1b9wA01	CATH	train	28	526	1.2462	1.3309	0.9932	1.0088	0.9909	0.9879	0.983	0.9822	0.9811	0.9811	0.9811	0.9811	0.9811	0.9811	0.9811
pdb|1b9wA02	CATH	test	21	354	1.0045	1.164	0.9821	1.0033	0.9897	0.991	0.9838	0.9832	0.9793	0.9791	0.9786	0.9786	0.9786	0.9786	0.9786
pdb|1b9xC02	CATH	train	25	388	1.7546	1.6584	1.1186	1.0728	1.0227	1.0088	1.0001	0.9971	0.9944	0.9937	0.9933	0.9933	0.9933	0.9933	0.9933
pdb|1ba1A01	CATH	train	64	608	6.19	4.6775	2.0141	1.6987	1.2644	1.1843	1.0867	1.0667	1.0431	1.0419	1.0371	1.0411	1.0437	1.0471	1.0493
pdb|1ba1A02	CATH	train	29	454	1.7348	1.5685	1.0308	1.0365	1.0074	1.0171	1.0182	1.0251	1.0265	1.0279	1.028	1.028	1.028	1.028	1.028
pdb|1ba1A03	CATH	test	47	590	3.9272	2.993	1.5127	1.2918	1.1116	1.0529	1.0109	0.9945	0.9838	0.9793	0.9765	0.9755	0.9749	0.9747	0.9745
pdb|1ba1A04	CATH	train	44	694	2.5843	2.3974	1.1887	1.1235	1.024	1.0025	0.9834	0.9726	0.9654	0.9587	0.9563	0.9552	0.9552	0.9552	0.9552
pdb|1ba3A05	CATH	train	28	506	1.3524	1.37	1.006	1.0118	0.9997	0.9989	0.9983	0.9988	0.9982	0.9988	0.9982	0.9988	0.9982	0.9988	0.9982
pdb|1bazA00	CATH	train	30	540	1.4701	1.4832	1.0111	1.0306	0.9985	1.0089	0.9971	1.0085	0.9986	1.0094	0.9986	1.0096	0.9986	1.0096	0.9986
pdb|1bb9A00	CATH	test	48	670	4.3056	2.9593	1.4879	1.264	1.1045	1.0582	1.0278	1.0151	1.0061	1.0026	0.9991	0.9955	0.9906	0.9869	0.9833
pdb|1bbgA00	CATH	train	15	174	0.8976	1.2243	0.9574	1.0179	0.9929	1.0022	0.9984	1.0019	0.9989	1.0014	0.9993	1.0013	0.9993	1.0013	0.9993
pdb|1bbhA00	CATH	train	69	450	9.2512	7.88	4.0488	3.3991	2.5642	2.245	1.9361	1.7613	1.6108	1.5086	1.4243	1.3589	1.3074	1.2656	1.2308
pdb|1bbuA01	CATH	train	83	770	8.4998	7.4439	3.0503	2.3943	1.6791	1.4364	1.252	1.1669	1.108	1.0768	1.0573	1.0469	1.0403	1.035	1.032
pdb|1bbyA00	CATH	test	37	392	3.2347	2.7096	1.3539	1.2068	1.0669	1.0348	1.0157	1.0087	1.0042	1.0017	0.9994	0.997	0.9942	0.992	0.9901
pdb|1bcgA00	CATH	train	27	316	1.3895	1.7438	0.9576	1.0911	0.9837	1.0207	0.9993	1.0139	1.009	1.0162	1.0166	1.0188	1.0199	1.0225	1.0231
pdb|1bcoA01	CATH	train	102	716	10.2755	8.4446	3.4602	3.0552	2.0527	1.8506	1.5319	1.4165	1.2888	1.2254	1.1628	1.1282	1.0965	1.0771	1.0612
pdb|1bcoA02	CATH	train	28	378	1.5879	1.7272	1.0452	1.0582	1.0033	1.005	0.9959	0.9973	0.994	0.9952	0.9924	0.9943	0.9924	0.9942	0.9926
pdb|1bcpA00	CATH	test	90	748	9.1166	8.439	3.6802	3.1678	2.1645	1.879	1.5563	1.4111	1.2815	1.209	1.1499	1.111	1.0813	1.0606	1.0466
pdb|1bcpB01	CATH	train	40	552	2.4665	2.3493	1.1453	1.1292	1.0217	1.0203	1.0089	1.0113	1.0115	1.0136	1.0149	1.0161	1.0175	1.0189	1.0194
pdb|1bcpB02	CATH	train	50	688	3.7249	3.1817	1.3869	1.3119	1.0772	1.0584	1.0065	0.9982	0.9824	0.9795	0.9748	0.973	0.9712	0.9703	0.9696
pdb|1bcpD00	CATH	train	44	748	1.847	1.8982	1.0077	1.0659	1.0017	1.0257	1.0187	1.0364	1.0398	1.0492	1.0513	1.0575	1.0577	1.058	1.058
pdb|1bcpF00	CATH	test	55	884	3.6495	2.8665	1.2748	1.168	1.036	1.0179	1.0063	1.0016	1.0022	0.9992	1.0019	0.999	1.0018	0.9989	1.0018
pdb|1bctA00	CATH	train	24	372	0.9395	1.3754	0.9128	1.0485	0.9838	1.0064	0.9957	0.9974	0.9938	0.9933	0.9922	0.9912	0.99	0.9886	0.989
pdb|1bd0A01	CATH	train	90	728	6.5961	4.6084	1.5971	1.7727	1.1281	1.2545	1.03	1.0903	1.0001	1.0235	0.9797	0.9851	0.9637	0.9662	0.9524
pdb|1bd0B02	CATH	train	76	914	5.5814	4.3938	1.6318	1.446	1.1179	1.0837	1.0284	1.0226	1.0128	1.0174	1.0168	1.021	1.0229	1.0268	1.0312
pdb|1bd3A00	CATH	test	101	1258	6.696	5.1798	1.6887	1.5862	1.1354	1.1102	1.0122	0.9941	0.9633	0.9546	0.942	0.9359	0.9337	0.9315	0.9314
pdb|1bd8A00	CATH	train	72	1254	3.1991	3.0651	1.1831	1.1814	1.0326	1.0471	1.0341	1.0549	1.0604	1.0689	1.0726	1.0769	1.0782	1.0798	1.0804
pdb|1bdbA00	CATH	train	120	1680	7.1492	5.2126	1.6325	1.5667	1.097	1.0826	0.985	0.9711	0.9373	0.9294	0.9091	0.9026	0.8885	0.8828	0.871
pdb|1bdoA00	CATH	train	38	650	1.6098	1.7402	0.9643	1.0648	0.9963	1.0218	1.0207	1.0316	1.0368	1.0459	1.0508	1.0564	1.0589	1.0632	1.0647
pdb|1bdsA00	CATH	test	15	178	0.874	1.2643	0.9434	1.0285	0.9861	1.0055	0.9958	1.0023	0.9981	1.0027	1.0014	1.0029	1.0036	1.0038	1.0043
pdb|1be3I00	CATH	train	16	186	1.1058	1.2242	1.0117	1.0104	1.0034	1.0043	1.0055	1.0073	1.0088	1.0099	1.01	1.01	1.0101	1.0101	1.0101
pdb|1be3K00	CATH	train	16	192	1.027	1.2438	0.9791	1.0133	0.9987	1.0026	1.0015	1.0032	1.0038	1.0039	1.0043	1.0043	1.0043	1.0043	1.0043
pdb|1beaA00	CATH	train	54	396	6.7661	5.4335	2.649	2.1576	1.5902	1.4004	1.2319	1.153	1.0917	1.06	1.0366	1.0235	1.0129	1.0056	1.0005
pdb|1bebA00	CATH	test	75	670	6.8511	5.5808	2.2049	1.888	1.3495	1.239	1.1112	1.0664	1.0255	1.0045	0.9884	0.9759	0.9693	0.9645	0.9617
pdb|1befA01	CATH	train	42	512	2.7857	2.5099	1.1665	1.1564	1.0162	1.0188	0.9966	0.9983	0.9937	0.9941	0.9936	0.9936	0.9936	0.9936	0.9936
pdb|1befA02	CATH	train	40	586	2.2242	2.2152	1.0908	1.0994	1.0061	1.0078	0.9925	0.9921	0.9838	0.986	0.9755	0.9766	0.9662	0.9666	0.9595
pdb|1bev100	CATH	train	126	1088	13.5464	10.7747	4.1638	3.5036	2.2161	1.9298	1.5511	1.4113	1.269	1.2029	1.1433	1.1121	1.0866	1.0718	1.0617
pdb|1bf2A01	CATH	test	54	844	2.7847	2.9401	1.1863	1.2103	1.0212	1.0278	0.9939	0.9941	0.9822	0.9792	0.9729	0.9673	0.9611	0.9552	0.9503
pdb|1bf2A02	CATH	train	175	1552	15.9306	14.9368	5.9455	6.1165	3.7597	3.8669	2.8901	2.9121	2.4179	2.3904	2.1093	2.067	1.8909	1.8416	1.7285
pdb|1bf2A03	CATH	train	27	402	1.1594	1.5684	0.9781	1.0449	0.9952	1.0091	1.0055	1.0101	1.0114	1.017	1.0178	1.0231	1.0277	1.0316	1.0347
pdb|1bf5A04	CATH	train	78	694	9.8097	7.2738	3.3769	2.5838	1.8914	1.598	1.3893	1.2683	1.1894	1.137	1.1019	1.0777	1.0608	1.0491	1.0417
pdb|1bf6A00	CATH	test	117	1168	9.4387	8.3944	2.9251	2.6324	1.6325	1.5095	1.2334	1.176	1.0811	1.0516	1.0146	1.003	0.9851	0.9811	0.9729
pdb|1bg1A01	CATH	train	90	1308	5.7267	5.021	1.7479	1.4767	1.1398	1.0758	1.0265	1.0147	1.0063	1.0056	1.0033	1.003	1.0022	1.002	1.002
pdb|1bg1A02	CATH	train	65	1122	3.2234	3.1017	1.2078	1.1822	1.018	1.0062	0.9837	0.9802	0.9779	0.9773	0.9773	0.9773	0.9773	0.9773	0.9773
pdb|1bg1A03	CATH	train	46	808	1.7527	2.0394	0.9962	1.0816	0.9848	0.9908	0.9674	0.9592	0.9476	0.9411	0.9347	0.9285	0.9239	0.9164	0.9111
pdb|1bg1A04	CATH	test	63	960	5.058	3.6675	1.5632	1.3151	1.0926	1.0429	0.996	0.976	0.9563	0.9485	0.945	0.944	0.944	0.944	0.944
pdb|1bg2A00	CATH	train	159	1620	16.2187	12.9457	5.138	4.0375	2.5051	2.0752	1.6275	1.4444	1.2874	1.2044	1.1447	1.108	1.0809	1.0644	1.0523
pdb|1bg5A03	CATH	train	20	282	1.1096	1.2514	0.9901	1.0095	0.9988	1.0007	0.9987	1.0003	0.9984	1.0003	0.9984	1.0003	0.9984	1.0003	0.9984
pdb|1bg6A01	CATH	train	70	538	5.7967	4.8991	2.0097	2.007	1.3982	1.3864	1.1895	1.1779	1.1011	1.0961	1.0616	1.059	1.0435	1.0428	1.035
pdb|1bg6A02	CATH	test	75	812	5.4785	4.3311	1.6718	1.4824	1.1325	1.0979	1.0291	1.0212	1.0054	1.0025	0.9968	0.9958	0.9916	0.9922	0.9898
pdb|1bgcA00	CATH	train	62	840	2.8374	2.6435	1.0586	1.1844	0.9887	1.0325	0.9936	1.006	0.9946	0.9998	0.9963	0.9997	0.9982	0.9997	0.9981
pdb|1bgfA00	CATH	train	54	864	2.7287	2.6039	1.1493	1.1336	1.0249	1.026	1.0221	1.0263	1.0268	1.0268	1.0268	1.0268	1.0268	1.0268	1.0268
pdb|1bgvA01	CATH	train	77	1098	5.3707	4.1958	1.617	1.4382	1.1232	1.0825	1.0241	1.0149	1.0018	1.0008	0.9968	0.9966	0.9951	0.9957	0.9946
pdb|1bgvA02	CATH	test	62	1182	2.7454	2.628	1.0915	1.136	1.0003	1.0225	0.9999	1.0141	1.0049	1.0134	1.0082	1.0153	1.0098	1.016	1.01
pdb|1bgvA03	CATH	train	34	616	1.4243	1.5257	0.9824	1.0279	1	1.0162	1.0171	1.0229	1.0239	1.0242	1.0242	1.0242	1.0242	1.0242	1.0242
pdb|1bgwA01	CATH	train	25	408	1.2821	1.3506	0.985	1.0173	0.9945	1.0012	0.9975	1.0007	1.0002	1.0021	1.0025	1.0028	1.004	1.0062	1.0071
pdb|1bgwA02	CATH	train	94	796	11.3563	8.7615	3.914	3.0353	2.0631	1.7298	1.4325	1.2929	1.1804	1.1178	1.0706	1.0389	1.0148	0.9979	0.9853
pdb|1bgwA03	CATH	test	76	938	6.2324	5.215	2.0215	1.6711	1.2556	1.1571	1.0746	1.0422	1.019	1.0039	0.9912	0.9783	0.9675	0.958	0.9476
pdb|1bgxT01	CATH	train	99	1300	7.2626	5.509	1.9052	1.6221	1.1882	1.1274	1.0503	1.0325	1.0104	1.0033	0.9963	0.9911	0.9872	0.9819	0.9781
pdb|1bgxT02	CATH	train	41	674	2.3641	2.0386	1.0726	1.0683	1.004	1.0065	1.0015	1.0041	1.0023	1.0042	1.0022	1.0046	1.0023	1.005	1.0023
pdb|1bh9A00	CATH	train	19	278	1.0543	1.1793	0.9804	1.0094	1.0001	1.0038	1.0004	1.004	1	1.0036	1.0002	1.0036	1.0002	1.0036	1.0002
pdb|1bh9B00	CATH	test	45	428	5.0768	3.9781	2.0101	1.6761	1.3211	1.21	1.112	1.0708	1.0398	1.0242	1.0128	1.0067	1.0031	1.0006	0.9995
pdb|1bhaA00	CATH	train	26	352	1.3736	1.5981	0.99	1.0619	0.9905	1.0093	0.9981	1.0041	1.0011	1.0019	1.0016	1.0016	1.0016	1.0016	1.0016
pdb|1bhdA00	CATH	train	57	550	5.6091	4.2807	1.9127	1.5967	1.2429	1.1509	1.0748	1.0461	1.0281	1.0196	1.013	1.0095	1.0073	1.0065	1.0055
pdb|1bheA00	CATH	train	165	1242	17.9529	16.7058	7.2262	6.3727	4.1786	3.6387	2.8302	2.505	2.1243	1.9241	1.7201	1.5938	1.4705	1.3914	1.3171
pdb|1bhgA01	CATH	test	82	1036	5.4863	4.9065	1.7588	1.5519	1.1698	1.1123	1.0483	1.0384	1.031	1.0303	1.0315	1.0328	1.0353	1.0362	1.0379
pdb|1bhgA02	CATH	train	42	632	2.0728	2.1696	1.0252	1.1195	0.994	1.0212	0.9989	1.0058	1.0007	1.002	1.0016	1.0017	1.0016	1.0017	1.0016
pdb|1bhgA03	CATH	train	133	1178	12.9268	9.8544	3.9155	3.1672	2.1136	1.7982	1.4924	1.3473	1.2361	1.1704	1.1195	1.0869	1.0633	1.0464	1.0357
pdb|1bhpA00	CATH	train	28	452	1.5098	1.5546	0.9942	1.0369	0.9925	0.9996	0.9918	0.9934	0.9913	0.9912	0.9912	0.9912	0.9912	0.9912	0.9912
pdb|1bhuA00	CATH	test	44	568	3.8002	3.0905	1.538	1.3538	1.1471	1.0973	1.0559	1.0429	1.0335	1.028	1.0248	1.0228	1.0214	1.0208	1.0204
pdb|1bi1A03	CATH	train	42	662	2.3863	2.0576	1.08	1.0781	0.9987	0.9975	0.9817	0.9764	0.9685	0.9613	0.9556	0.9514	0.9476	0.9462	0.9455
pdb|1bi6H00	CATH	train	20	312	1.0091	1.2251	0.9737	1.0109	0.9963	1.0019	0.9987	0.9992	0.9975	0.9967	0.9944	0.9929	0.9925	0.9925	0.9925
pdb|1bi7B00	CATH	train	55	488	5.2586	3.8081	1.623	1.5682	1.1431	1.1661	1.0425	1.055	1.0144	1.0186	1.001	1.0002	0.9925	0.991	0.987
pdb|1biaA01	CATH	test	28	392	1.4777	1.5769	0.9872	1.0435	0.9951	1.0048	0.9987	0.999	0.9968	0.9969	0.9968	0.9955	0.9925	0.9896	0.9852
pdb|1biaA03	CATH	train	26	410	1.2565	1.3892	0.9847	1.022	0.9911	0.9976	0.9919	0.9931	0.992	0.992	0.992	0.992	0.992	0.992	0.992
pdb|1bifA01	CATH	train	92	782	9.7744	7.8807	3.4744	2.9261	2.0044	1.7797	1.478	1.3702	1.2488	1.1912	1.1331	1.1014	1.074	1.056	1.0421
pdb|1bifA02	CATH	train	117	1258	10.6943	9.1822	3.5557	2.9148	1.9549	1.7111	1.4395	1.3275	1.2203	1.1606	1.1087	1.0763	1.0492	1.0286	1.0155
pdb|1bihA01	CATH	test	47	696	2.7257	2.3484	1.1313	1.1229	1.014	1.0212	1.0062	1.0137	1.01	1.0137	1.0114	1.0147	1.012	1.015	1.012
pdb|1bihA02	CATH	train	58	856	4.2031	3.267	1.4295	1.257	1.0741	1.0408	1.0145	1.0113	1.005	1.0051	1.0033	1.0048	1.0033	1.0046	1.0033
pdb|1bihA03	CATH	train	48	892	2.3707	2.2512	1.1125	1.0963	1.0181	1.0188	1.0157	1.0203	1.0214	1.0227	1.0229	1.0247	1.0257	1.0273	1.0278
pdb|1bihA04	CATH	train	46	912	1.753	1.8095	1.0161	1.0452	0.9936	0.9862	0.9714	0.9616	0.9409	0.9322	0.9215	0.9174	0.9108	0.9093	0.9088
pdb|1bikA00	CATH	test	40	812	1.2774	1.6872	0.9466	1.0667	0.9794	1.0139	0.9971	1.0068	1.0032	1.0046	1.0045	1.0047	1.0047	1.0047	1.0047
pdb|1bioA01	CATH	train	58	994	3.9253	2.835	1.3509	1.1783	1.0549	1.0242	1.0056	0.9997	0.997	0.9953	0.9943	0.9945	0.9934	0.9942	0.9934
pdb|1bioA02	CATH	train	49	1014	1.8761	1.876	1.0038	1.0587	0.9942	1.0021	0.9893	0.9889	0.9826	0.9806	0.9768	0.975	0.9793	0.9807	0.9823
pdb|1bj6A00	CATH	train	27	502	1.2884	1.3336	0.9895	1.0176	1.0052	1.0159	1.0195	1.0252	1.026	1.026	1.026	1.026	1.026	1.026	1.026
pdb|1bj7A00	CATH	test	78	778	9.0581	7.2681	3.3885	2.7271	1.9735	1.6947	1.4535	1.3271	1.2307	1.1696	1.127	1.0978	1.0754	1.0585	1.0466
pdb|1bjaA00	CATH	train	44	658	2.8392	2.3334	1.2015	1.1234	1.027	1.0147	1.0018	1.0016	0.9989	0.9981	0.9978	0.9978	0.9978	0.9978	0.9978
pdb|1bjtA01	CATH	train	24	436	1.1761	1.2523	0.9981	1.004	0.9928	0.9896	0.9888	0.9888	0.9888	0.9888	0.9888	0.9888	0.9888	0.9888	0.9888
pdb|1bjtA02	CATH	train	106	878	12.1886	9.4401	4.155	3.1729	2.139	1.7754	1.4653	1.3157	1.2048	1.1424	1.0935	1.0642	1.043	1.0282	1.0186
pdb|1bjtA03	CATH	test	64	824	5.2029	4.1561	1.7327	1.5127	1.1873	1.1291	1.0668	1.0522	1.0406	1.0414	1.0419	1.0481	1.0505	1.0537	1.0544
pdb|1bjtA04	CATH	train	53	850	3.2554	2.7213	1.2378	1.1549	1.0314	1.0198	0.999	1.0008	0.9905	0.9938	0.9893	0.9916	0.9895	0.9915	0.9893
pdb|1bjtA05	CATH	train	108	1266	8.7883	6.8239	2.6079	2.2774	1.491	1.4071	1.1691	1.1365	1.0528	1.0361	1.0054	0.9995	0.9836	0.9821	0.9746
pdb|1bjxA00	CATH	train	53	1042	2.0613	2.0667	1.0139	1.0638	0.9804	0.9798	0.9568	0.9523	0.9408	0.9367	0.9312	0.9253	0.9224	0.9163	0.9131
pdb|1bkbA01	CATH	test	42	864	1.7749	1.7096	1.0279	1.0371	1.0124	1.0276	1.0344	1.0388	1.0392	1.0392	1.0392	1.0392	1.0392	1.0392	1.0392
pdb|1bkbA02	CATH	train	47	944	2.6532	2.0833	1.1425	1.0759	1.0283	1.0312	1.0352	1.037	1.0371	1.037	1.0367	1.0363	1.0361	1.0361	1.0361
pdb|1bkfA00	CATH	train	56	1072	3.259	2.518	1.2169	1.1239	1.0384	1.0394	1.0374	1.0374	1.0373	1.0372	1.0372	1.0372	1.0372	1.0372	1.0372
pdb|1bkjA00	CATH	train	113	1496	10.0292	7.1537	2.8493	2.25	1.5834	1.4042	1.2322	1.1669	1.1112	1.0829	1.0622	1.049	1.0399	1.0334	1.0293
pdb|1bkpA00	CATH	test	136	2040	10.0271	7.4544	2.5258	1.9299	1.3549	1.227	1.1352	1.1205	1.1136	1.1222	1.1321	1.1375	1.1421	1.1445	1.1461
pdb|1bkrA00	CATH	train	57	1316	2.4028	2.1866	1.0994	1.0616	0.9785	0.9605	0.9462	0.9413	0.9341	0.9281	0.925	0.9223	0.9218	0.9217	0.9214
pdb|1bl0A01	CATH	train	39	940	1.5147	1.4928	1.0156	1.0048	0.9939	0.9936	0.9936	0.9936	0.9936	0.9936	0.9936	0.9936	0.9936	0.9936	0.9936
pdb|1bl0A02	CATH	train	28	558	0.9905	1.2478	0.9573	1.0176	1.0038	1.0114	1.0132	1.0158	1.0185	1.0204	1.0254	1.0259	1.0275	1.026	1.0264
pdb|1blxA01	CATH	test	47	684	3.8329	2.7692	1.4195	1.2289	1.0887	1.0495	1.0323	1.0278	1.0288	1.0346	1.0401	1.0462	1.0535	1.0602	1.0655
pdb|1bm8A00	CATH	train	45	774	2.6468	2.2448	1.1652	1.1126	1.0255	1.0229	1.0157	1.0165	1.0177	1.019	1.0202	1.0206	1.021	1.0215	1.0215
pdb|1bm9A00	CATH	train	73	1030	6.4871	4.7156	2.0222	1.6205	1.2463	1.1539	1.081	1.0607	1.0455	1.0411	1.0366	1.0335	1.03	1.0276	1.0242
pdb|1bmfG00	CATH	train	66	1154	4.0788	3.1834	1.3736	1.2124	1.0642	1.0408	1.0253	1.0339	1.0438	1.0621	1.0731	1.0844	1.0921	1.0984	1.0997
pdb|1bmlC03	CATH	test	53	1116	2.6694	2.3236	1.1548	1.0883	1.0135	1.0016	0.9984	0.9987	0.9993	0.9996	0.9998	0.9998	0.9998	0.9998	0.9998
pdb|1bmrA00	CATH	train	36	776	1.372	1.4694	0.9962	1.0162	0.9981	0.9982	0.9978	0.9978	0.9978	0.9978	0.9978	0.9978	0.9978	0.9978	0.9978
pdb|1bo1A02	CATH	train	83	1086	7.4415	5.5396	2.4471	1.8721	1.4133	1.241	1.132	1.0794	1.0501	1.0322	1.0238	1.0167	1.0155	1.0113	1.0126
pdb|1bo4A00	CATH	train	66	1136	3.4948	2.7506	1.1904	1.1575	1.0283	1.0411	1.0259	1.0388	1.0391	1.0475	1.0501	1.0585	1.0624	1.0662	1.0691
pdb|1bobA01	CATH	test	58	1172	2.4376	2.1768	1.0684	1.0781	1.01	1.0209	1.0166	1.0212	1.0215	1.0246	1.0251	1.0252	1.0253	1.0253	1.0253
pdb|1bobA02	CATH	train	62	1322	3.4067	2.7781	1.3172	1.2014	1.0641	1.0571	1.0145	1.0313	1.0053	1.0271	1.006	1.0297	1.0094	1.0325	1.0119
pdb|1bobA03	CATH	train	24	454	0.9906	1.1992	0.9785	1.0092	0.9963	1.0052	1.0005	1.0059	1.0022	1.006	1.0025	1.0066	1.0029	1.0068	1.003
pdb|1bolA00	CATH	train	74	738	6.8746	6.4427	2.7073	2.766	1.7908	1.8025	1.4385	1.4243	1.2696	1.248	1.1738	1.1549	1.1146	1.0997	1.0764
pdb|1booA00	CATH	test	114	1196	9.547	7.2526	2.6816	2.178	1.4766	1.322	1.1644	1.1185	1.0813	1.0745	1.0696	1.0728	1.0786	1.0853	1.0894
pdb|1borA00	CATH	train	21	356	0.9205	1.1691	0.9848	1.0047	0.9994	1.004	1.003	1.0075	1.0064	1.011	1.0123	1.0154	1.0169	1.0187	1.0194
pdb|1bpoA02	CATH	train	58	538	5.2832	3.9547	1.7573	1.5471	1.1882	1.1373	1.0564	1.04	1.0171	1.0125	1.0066	1.0055	1.0032	1.0034	1.0019
pdb|1bprA00	CATH	train	78	844	7.2392	5.9419	2.5111	2.0226	1.4819	1.311	1.1745	1.1071	1.0603	1.03	1.0109	0.9972	0.9874	0.9816	0.9782
pdb|1bpvA00	CATH	test	56	856	3.1547	2.9302	1.2441	1.2025	1.0425	1.0343	1.0126	1.0095	1.0023	0.994	0.9901	0.9837	0.9796	0.9729	0.9683
pdb|1bqcA00	CATH	train	122	1348	10.4393	8.3534	3.1628	2.6053	1.7021	1.5186	1.2832	1.2182	1.1443	1.1202	1.0979	1.0892	1.0833	1.0806	1.0778
pdb|1bquA01	CATH	train	57	1068	2.9434	2.7849	1.2288	1.1567	1.0358	1.0285	1.023	1.0283	1.0317	1.0376	1.0399	1.0403	1.0405	1.0406	1.0406
pdb|1bquA02	CATH	train	64	1234	4.0548	3.1889	1.3987	1.2102	1.0502	1.0108	0.9882	0.981	0.9787	0.9774	0.9769	0.9768	0.9768	0.9768	0.9768
pdb|1br7003	CATH	test	65	1392	2.8019	2.5162	1.1115	1.0893	0.993	0.9826	0.9656	0.966	0.9584	0.9589	0.9566	0.9562	0.9561	0.9561	0.9561
pdb|1brtA00	CATH	train	97	1694	4.8062	3.7242	1.2978	1.3225	1.0144	1.0354	0.9665	0.9724	0.9489	0.9506	0.9386	0.9382	0.9332	0.9307	0.9271
pdb|1brwA01	CATH	train	40	860	1.3231	1.5609	0.9632	1.0321	0.9927	1.0044	1.0021	1.002	1.002	1.002	1.002	1.002	1.002	1.002	1.002
pdb|1brzA00	CATH	train	30	588	1.3265	1.389	0.9865	1.0227	1.0033	1.0109	1.012	1.0164	1.0182	1.0192	1.0182	1.0166	1.0158	1.0157	1.0157
pdb|1bs0A01	CATH	test	64	782	5.9474	4.3881	2.0414	1.6693	1.3258	1.202	1.1098	1.0605	1.021	0.9999	0.9838	0.9738	0.9674	0.9639	0.9612
pdb|1bs0A02	CATH	train	74	1016	3.5451	3.2263	1.219	1.2896	1.0538	1.0761	1.0388	1.0518	1.0516	1.0623	1.0662	1.0746	1.0834	1.0913	1.0977
pdb|1bteA00	CATH	train	49	888	2.6811	2.2967	1.1148	1.1015	1.0132	1.0181	1.0108	1.0139	1.0137	1.0151	1.0161	1.0166	1.0168	1.0168	1.0168
pdb|1btkA00	CATH	train	69	1092	5.0905	3.6645	1.5603	1.2844	1.0908	1.0391	1.0131	1.0025	0.9985	0.9961	0.9953	0.9951	0.9944	0.9938	0.9929
pdb|1btnA00	CATH	test	52	1084	2.3377	2.1877	1.102	1.0735	1.0202	1.0248	1.0247	1.0248	1.0248	1.0248	1.0248	1.0248	1.0248	1.0248	1.0248
pdb|1bu8A01	CATH	train	150	1710	14.8333	11.6283	4.7182	3.6116	2.3315	1.9173	1.5511	1.3943	1.2692	1.2135	1.17	1.1554	1.1439	1.1457	1.1465
pdb|1bu8A02	CATH	train	57	1274	2.3306	2.1617	1.0722	1.0632	0.9887	0.9876	0.9745	0.9721	0.9675	0.967	0.9661	0.9658	0.9656	0.9656	0.9655
pdb|1bucA01	CATH	train	60	1392	2.4634	2.2264	1.0898	1.0772	1.0069	1.0038	0.996	0.9935	0.9928	0.9924	0.9923	0.9923	0.9923	0.9923	0.9923
pdb|1bunB00	CATH	test	35	766	1.3337	1.4439	0.9848	1.0278	1.0072	1.0146	1.0139	1.0154	1.0154	1.0156	1.0157	1.0157	1.0157	1.0157	1.0157
pdb|1bvp101	CATH	train	49	870	2.5223	2.1261	1.0582	1.1007	0.9883	1.0081	0.9763	0.9868	0.9658	0.9691	0.9589	0.9564	0.9528	0.951	0.947
pdb|1bvp102	CATH	train	50	956	2.1143	2.0173	1.0325	1.0747	1.0039	1.0191	1.0096	1.017	1.0152	1.0188	1.0186	1.0194	1.0196	1.0197	1.0197
pdb|1bvp103	CATH	train	44	946	1.4407	1.6184	0.9553	1.0535	0.9993	1.028	1.0272	1.0495	1.056	1.0697	1.0751	1.0844	1.0874	1.0935	1.0941
pdb|1bvsF03	CATH	test	25	478	1.0123	1.1749	0.9757	1.0084	0.9998	1.0007	1.0003	1	0.9998	0.9998	0.9998	0.9998	0.9998	0.9998	0.9998
pdb|1bvyF00	CATH	train	64	694	5.7228	4.2989	1.9488	1.6812	1.3334	1.2371	1.1506	1.1129	1.0857	1.0714	1.0627	1.0593	1.0582	1.0596	1.0631
pdb|1bw0A02	CATH	train	106	1126	8.5828	6.5439	2.3916	2.0095	1.3903	1.2617	1.1165	1.0633	1.0173	0.9933	0.9667	0.952	0.9391	0.9302	0.9254
pdb|1bw0B01	CATH	train	80	1194	5.012	3.9895	1.5275	1.3236	1.0783	1.0352	0.9954	0.9815	0.973	0.9674	0.962	0.9556	0.953	0.9496	0.9468
pdb|1bw3A00	CATH	test	66	1208	3.6446	3.264	1.2863	1.2013	1.0424	1.0306	1.0232	1.0236	1.0236	1.0236	1.0236	1.0236	1.0236	1.0236	1.0236
pdb|1bwvS00	CATH	train	62	1250	2.3814	2.3869	1.0516	1.1125	1.0096	1.0368	1.0267	1.0393	1.0408	1.0463	1.0492	1.05	1.0529	1.0548	1.056
pdb|1bx4A01	CATH	train	111	1654	7.7397	5.1792	1.8567	1.4866	1.1313	1.0543	0.9942	0.9716	0.9525	0.9455	0.9395	0.9348	0.9293	0.926	0.9221
pdb|1bx4A02	CATH	train	33	646	1.5027	1.4543	0.9742	1.0253	0.9928	0.9997	0.9973	1.0003	1.0003	1.0007	1.0003	1.0007	1.0003	1.0007	1.0003
pdb|1bx7A00	CATH	test	27	524	1.0181	1.2928	0.9502	1.0211	0.9822	0.9882	0.9753	0.9735	0.9676	0.9662	0.9626	0.9621	0.9616	0.9616	0.9616
pdb|1bxdA00	CATH	train	67	758	6.0526	4.6735	2.1266	1.7582	1.3672	1.2374	1.1399	1.0896	1.0585	1.0392	1.0265	1.0175	1.0119	1.0071	1.0045
pdb|1bxkA02	CATH	train	39	654	1.991	1.8148	1.0371	1.0635	1.0065	1.02	1.0183	1.0229	1.0238	1.0245	1.0245	1.0245	1.0245	1.0245	1.0245
pdb|1bxoA01	CATH	train	53	810	3.1574	3.0717	1.2298	1.2938	1.0365	1.0463	0.9925	0.9893	0.9734	0.9688	0.9617	0.9586	0.955	0.9521	0.9497
pdb|1bxoA02	CATH	test	44	838	1.5482	1.9587	0.9116	1.1428	0.9589	1.0365	1.0011	1.0306	1.0282	1.0459	1.049	1.0635	1.0693	1.0791	1.0846
pdb|1bxrA05	CATH	train	59	1016	3.7759	2.8998	1.2918	1.1899	1.0412	1.0272	1.0065	1.0033	0.9999	0.998	0.9984	0.9974	0.9983	0.9973	0.9983
pdb|1bxrA07	CATH	train	35	776	1.2576	1.3737	0.9863	1.0138	0.9951	0.9992	0.9959	0.9997	0.9992	1.0037	1.0089	1.0128	1.0156	1.0188	1.0263
pdb|1bxyA00	CATH	train	29	616	1.1017	1.2365	0.9879	1.011	0.9896	1.0093	0.9905	1.0074	0.9907	1.0074	0.9905	1.0074	0.9905	1.0074	0.9905
pdb|1by1A00	CATH	test	97	1010	11.3713	9.261	4.3307	3.4237	2.4354	2.0451	1.7232	1.5389	1.3949	1.3001	1.2249	1.1706	1.1282	1.0937	1.0676
pdb|1byfA00	CATH	train	53	878	3.8672	2.8408	1.388	1.1989	1.0704	1.0456	1.0338	1.0387	1.0472	1.0541	1.057	1.0572	1.0572	1.0572	1.0572
pdb|1byiA00	CATH	train	94	1228	7.4753	5.4329	2.0791	1.7402	1.2675	1.1682	1.0541	1.0126	0.9742	0.9552	0.9413	0.9352	0.9302	0.928	0.9256
pdb|1bykA01	CATH	train	61	1154	2.3747	2.2044	1.0114	1.0998	0.9727	0.985	0.9486	0.9428	0.9198	0.9074	0.8878	0.8774	0.8593	0.8522	0.8408
pdb|1bykA02	CATH	test	52	1132	1.9551	1.8555	1.0228	1.0403	1.0015	1.0103	1.0036	1.0083	1.0042	1.0082	1.0055	1.0108	1.0081	1.0133	1.0111
pdb|1bymA00	CATH	train	55	1238	2.4863	2.1006	1.1077	1.088	1.0311	1.0466	1.0446	1.0519	1.0521	1.0524	1.0524	1.0524	1.0524	1.0524	1.0524
pdb|1byrA00	CATH	train	67	1406	3.4006	2.5593	1.1549	1.1016	0.9879	0.9859	0.9509	0.9473	0.9286	0.9216	0.9135	0.9118	0.9108	0.9108	0.9108
pdb|1byuB00	CATH	train	89	1718	5.2336	3.6812	1.4791	1.299	1.1	1.0796	1.0552	1.0665	1.0727	1.0896	1.1029	1.1194	1.1364	1.1493	1.1553
pdb|1bywA00	CATH	test	46	1186	1.272	1.5168	0.9643	1.0293	0.9867	1.0058	0.9866	1.0027	0.985	1.0026	0.9844	1.002	0.9841	1.0006	0.9833
pdb|1byyA00	CATH	train	13	140	1.0004	1.1113	0.9987	1.0025	0.9992	1.0004	0.9996	1.0002	0.9994	1.0002	0.9991	1.0002	0.9991	1.0002	0.9991
pdb|1bzkA00	CATH	train	18	166	1.3225	1.602	1.0651	1.103	1.0204	1.0218	1.0037	1.0026	0.9975	0.9962	0.9941	0.9936	0.9921	0.9913	0.9906
pdb|1c01A00	CATH	train	26	240	2.1553	2.2462	1.2619	1.2152	1.0733	1.0496	1.0217	1.0135	1.0075	1.0058	1.0046	1.0046	1.0042	1.0041	1.0042
pdb|1c07A00	CATH	test	47	402	4.105	3.3318	1.4394	1.3824	1.1026	1.0884	1.0258	1.0217	1.0026	1.003	0.9955	0.9973	0.9923	0.9946	0.9911
pdb|1c0mA02	CATH	train	25	308	1.6557	1.7031	1.0392	1.0592	1.0005	1.0028	0.9912	0.9911	0.9868	0.9873	0.9854	0.9854	0.9852	0.9852	0.9852
pdb|1c0pA01	CATH	train	84	634	9.8172	8.1649	3.8124	3.1791	2.28	1.9854	1.6906	1.5408	1.4141	1.3357	1.2719	1.2276	1.1929	1.1687	1.1477
pdb|1c0pA02	CATH	train	74	830	5.6496	4.9208	1.7846	1.5896	1.1811	1.1278	1.059	1.0501	1.0413	1.0457	1.0483	1.0542	1.0594	1.0653	1.0685
pdb|1c17M00	CATH	test	55	704	1.0587	1.7947	0.5589	1.3595	0.7284	1.2138	0.8493	1.1173	0.9295	1.0573	0.9725	1.0268	0.9987	1.0327	1.0168
pdb|1c1dA01	CATH	train	62	892	3.4368	2.9986	1.2259	1.189	1.0238	1.0075	0.9785	0.9734	0.9632	0.9592	0.955	0.9517	0.9496	0.9475	0.9463
pdb|1c1dA02	CATH	train	86	1162	5.4492	4.1387	1.4251	1.3744	1.0506	1.0437	0.9762	0.9679	0.9466	0.9384	0.932	0.9301	0.9276	0.9271	0.9264
pdb|1c1kA01	CATH	train	51	946	2.0976	2.1428	1.0079	1.0784	0.9908	0.9996	0.9906	0.9917	0.9904	0.9904	0.9904	0.9904	0.9904	0.9904	0.9904
pdb|1c1kA02	CATH	test	51	1054	1.8982	2.0257	1.0272	1.0563	0.9871	0.9774	0.9655	0.9579	0.9478	0.9425	0.9382	0.9364	0.9358	0.9356	0.9355
pdb|1c1yB00	CATH	train	35	656	1.4	1.5222	0.971	1.0289	0.9988	1.0068	1.0068	1.01	1.0106	1.0118	1.0122	1.0131	1.0131	1.0137	1.0134
pdb|1c20A00	CATH	train	58	826	4.6835	3.4205	1.6092	1.3575	1.1466	1.0813	1.0433	1.0258	1.0165	1.0112	1.0087	1.0069	1.0059	1.0053	1.005
pdb|1c30A08	CATH	train	72	1062	5.4151	4.1797	1.6923	1.4462	1.1571	1.1079	1.0655	1.0608	1.0622	1.07	1.0789	1.086	1.0905	1.0936	1.0939
pdb|1c3cA01	CATH	test	46	878	2.1024	1.9316	1.0336	1.0626	1.012	1.0236	1.0231	1.0296	1.035	1.0425	1.0482	1.0497	1.05	1.0506	1.0506
pdb|1c3cA02	CATH	train	123	1376	12.9257	9.0613	3.6206	2.6829	1.7639	1.4844	1.2433	1.1424	1.0577	1.0137	0.9746	0.9463	0.9221	0.9033	0.8885
pdb|1c3cA03	CATH	train	40	856	1.6624	1.632	0.9983	1.0268	0.9983	1.0022	1.0017	1.0013	1.0012	1.0012	1.0012	1.0012	1.0012	1.0012	1.0012
pdb|1c3gA01	CATH	train	46	952	2.6398	2.1594	1.1399	1.0954	1.028	1.0353	1.04	1.0481	1.0519	1.0524	1.0524	1.0524	1.0524	1.0524	1.0524
pdb|1c3gA02	CATH	test	37	854	1.3004	1.4431	0.9802	1.0221	1.004	1.0136	1.0156	1.017	1.0172	1.0172	1.0172	1.0172	1.0172	1.0172	1.0172
pdb|1c3kA00	CATH	train	56	982	3.6048	2.6603	1.2726	1.1678	1.0438	1.0231	1.0061	1.0021	0.9981	0.9978	0.9967	0.9961	0.9948	0.9952	0.9946
pdb|1c3pA00	CATH	train	177	1734	19.1542	14.4789	6.0202	4.6502	3.0067	2.4641	1.9611	1.7235	1.5289	1.4191	1.333	1.2778	1.2369	1.2122	1.1946
pdb|1c3yA00	CATH	train	67	1278	4.2746	3.1457	1.3638	1.1853	1.0321	0.9942	0.976	0.9706	0.9686	0.9684	0.9684	0.9684	0.9684	0.9684	0.9684
pdb|1c41A00	CATH	test	80	1492	4.1183	3.3199	1.3132	1.238	1.0705	1.0716	1.0572	1.0626	1.0626	1.0674	1.0678	1.0682	1.0682	1.0682	1.0682
pdb|1c4kA01	CATH	train	52	1214	1.8568	1.8406	1.0098	1.0323	0.9773	0.9761	0.9613	0.9586	0.9518	0.95	0.9469	0.9462	0.9461	0.9461	0.9461
pdb|1c4kA02	CATH	train	135	1778	12.3635	8.6573	3.4697	2.5674	1.7704	1.4884	1.2885	1.1928	1.1282	1.0982	1.0728	1.0644	1.0591	1.061	1.0612
pdb|1c4kA03	CATH	train	73	1546	3.3646	2.5325	1.1147	1.1142	1.0237	1.057	1.0434	1.0784	1.0816	1.0962	1.0971	1.0984	1.0984	1.0984	1.0984
pdb|1c4kA04	CATH	test	67	1614	2.6235	2.1859	1.045	1.0659	1.0112	1.0313	1.0301	1.0372	1.0414	1.0483	1.0539	1.0636	1.0629	1.0635	1.0599
pdb|1c4oA03	CATH	train	96	1916	5.7243	3.7261	1.4539	1.337	1.0867	1.1036	1.0566	1.0733	1.0609	1.0677	1.0655	1.0672	1.0672	1.0672	1.0672
pdb|1c4qA00	CATH	train	36	906	1.2499	1.3648	0.9795	1.0052	0.9845	0.9789	0.9717	0.9636	0.9567	0.9543	0.952	0.9513	0.9509	0.9506	0.9505
pdb|1c4xA00	CATH	train	121	1350	9.2772	6.0029	2.1696	1.9122	1.2731	1.233	1.059	1.0508	0.9848	0.9834	0.9536	0.9523	0.9364	0.9333	0.9186
pdb|1c52A00	CATH	test	58	1134	3.4128	2.4243	1.1487	1.1083	1.0053	1.0046	0.9842	0.9861	0.9771	0.9809	0.9757	0.9805	0.9758	0.9805	0.9758
pdb|1c5eA00	CATH	train	32	734	0.9702	1.3011	0.9436	1.0272	0.9869	1.0035	0.9984	0.9995	0.9996	0.9996	0.9996	0.9996	0.9996	0.9996	0.9996
pdb|1c6vX00	CATH	train	28	570	1.0668	1.2333	0.9722	1.0032	0.988	0.9899	0.9776	0.9788	0.9686	0.9663	0.9646	0.964	0.964	0.964	0.964
pdb|1c75A00	CATH	train	29	584	1.0257	1.2595	0.9738	1.0218	1.0073	1.0201	1.0211	1.0291	1.0293	1.0319	1.0319	1.032	1.032	1.032	1.032
pdb|1c7kA00	CATH	test	57	764	5.1427	4.4855	2.1571	1.8598	1.4467	1.3171	1.1929	1.1309	1.0782	1.0433	1.0157	0.9913	0.9731	0.9569	0.9472
pdb|1c7nA01	CATH	train	83	1052	6.4821	4.7847	1.8897	1.6505	1.2181	1.1618	1.0608	1.0436	1.0163	1.0114	1.0023	1.0042	1.0018	1.0012	1.0006
pdb|1c7nA02	CATH	train	116	1510	9.1046	6.7584	2.4853	2.0272	1.4068	1.2745	1.125	1.0711	1.0173	0.9962	0.9772	0.9691	0.9639	0.9603	0.9579
pdb|1c7sA01	CATH	train	72	1334	3.4191	3.0426	1.1778	1.1624	1.0216	1.0192	1.0051	1.0058	1.0033	1.003	1.003	1.003	1.003	1.003	1.003
pdb|1c7sA02	CATH	test	60	1264	2.3652	2.2339	1.0532	1.0924	1.0057	1.021	1.0112	1.0176	1.0167	1.0187	1.0178	1.0188	1.0179	1.0188	1.0179
pdb|1c7sA03	CATH	train	240	2296	26.7047	21.0722	8.895	6.8141	4.3131	3.3944	2.5666	2.1314	1.7811	1.5654	1.3935	1.2766	1.1837	1.1181	1.067
pdb|1c7sA04	CATH	train	30	642	1.1167	1.2817	0.9808	1.005	0.9886	0.9842	0.9766	0.9696	0.9645	0.9545	0.9483	0.9475	0.9471	0.9468	0.9468
pdb|1c8bA00	CATH	train	156	1290	18.5244	15.9805	7.2192	6.4318	4.3564	3.9434	3.1935	2.9431	2.6063	2.4459	2.2679	2.1585	2.0524	1.9779	1.908
pdb|1c8cA00	CATH	test	33	678	1.615	1.4815	1.0358	1.0259	1.0032	1.0003	0.998	0.9964	0.9952	0.9944	0.9939	0.9938	0.9938	0.9938	0.9938
pdb|1c8iA01	CATH	train	71	910	5.5448	4.2789	1.7345	1.5934	1.201	1.1664	1.0813	1.0685	1.0465	1.0434	1.0395	1.0396	1.0387	1.0383	1.039
pdb|1c8iA02	CATH	train	60	1012	3.1144	2.6231	1.167	1.1484	1.0217	1.0205	1.0045	1.0088	1.007	1.0091	1.0092	1.0093	1.0093	1.0093	1.0093
pdb|1c8nC00	CATH	train	76	1216	4.6285	3.8255	1.4563	1.3543	1.0879	1.064	1.0239	1.0176	1.0113	1.0092	1.0084	1.0082	1.0082	1.0082	1.0082
pdb|1c8rA00	CATH	test	84	1442	2.5971	2.5481	0.8592	1.293	0.8749	1.0924	0.9076	1.0188	0.9244	0.9844	0.931	0.9613	0.9347	0.9509	0.9349
pdb|1c8uA01	CATH	train	62	1352	2.0525	2.0508	0.985	1.0756	0.9745	1.0085	0.9863	0.995	0.9908	0.9906	0.9906	0.9906	0.9906	0.9906	0.9906
pdb|1c8uA02	CATH	train	52	1224	1.9092	1.9157	1.0233	1.042	0.9917	0.9926	0.98	0.9783	0.9775	0.9774	0.9774	0.9774	0.9774	0.9774	0.9774
pdb|1c96A01	CATH	train	87	1498	6.0149	3.978	1.5364	1.318	1.0781	1.0385	1.004	0.9962	0.9905	0.99	0.9898	0.9898	0.9898	0.9898	0.9898
pdb|1c96A02	CATH	test	53	1366	1.74	1.7908	1.0155	1.034	0.9975	1.0042	0.9934	0.9978	0.9935	0.9964	0.9929	0.9963	0.9927	0.9963	0.9927
pdb|1c96A03	CATH	train	82	1594	4.8	3.2866	1.2738	1.2213	1.0255	1.0247	0.9986	0.9968	0.9936	0.9936	0.9936	0.9936	0.9936	0.9936	0.9936
pdb|1c96A04	CATH	train	116	2008	9.0352	5.805	2.1559	1.6539	1.2749	1.1817	1.1286	1.1068	1.0937	1.0874	1.0834	1.0812	1.0796	1.0789	1.078
pdb|1c9bA01	CATH	train	48	1304	1.3092	1.4886	0.9647	1.0243	0.9967	1.0074	1.002	1.0055	1.0027	1.0053	1.0026	1.0053	1.0026	1.0053	1.0026
pdb|1c9bA02	CATH	test	54	1374	2.3319	1.891	1.0787	1.0588	1.0006	1.0013	0.9879	0.9915	0.9853	0.9894	0.9842	0.9893	0.9839	0.9889	0.9839
pdb|1c9kB00	CATH	train	71	1546	3.7241	2.5508	1.1826	1.1301	1.0364	1.0562	1.0567	1.0788	1.0885	1.1102	1.1175	1.127	1.1305	1.1324	1.1328
pdb|1c9oA00	CATH	train	35	860	1.1531	1.295	0.9643	1.0131	0.9912	0.9985	0.9892	0.9921	0.9812	0.984	0.9739	0.9765	0.9702	0.9725	0.968
pdb|1ca1A01	CATH	train	140	1442	18.1509	14.8378	7.1744	5.6526	3.962	3.235	2.6229	2.2529	1.9626	1.7625	1.6059	1.4898	1.3982	1.3267	1.2696
pdb|1ca1A02	CATH	test	65	1182	4.6383	3.2966	1.4181	1.2332	1.0655	1.0538	1.0425	1.0453	1.0453	1.0456	1.0456	1.0456	1.0456	1.0456	1.0456
pdb|1cb6A01	CATH	train	90	1482	6.3354	4.7113	1.8568	1.506	1.1836	1.1007	1.0423	1.0224	1.0054	0.9957	0.9871	0.9752	0.9625	0.9516	0.9411
pdb|1cb6A04	CATH	train	67	1472	2.49	2.3807	1.0523	1.0854	0.977	0.9752	0.9513	0.949	0.9451	0.945	0.945	0.945	0.945	0.945	0.945
pdb|1cb8A01	CATH	train	147	2074	13.5727	9.4195	3.9492	2.8906	2.0295	1.6745	1.4154	1.2693	1.1661	1.0963	1.0471	1.0103	0.9855	0.9662	0.9465
pdb|1cb8A02	CATH	test	112	2210	5.8685	4.5658	1.4978	1.3497	1.0626	1.0366	0.9825	0.9687	0.9465	0.9353	0.9266	0.9211	0.9188	0.912	0.9079
pdb|1cb8A03	CATH	train	49	1208	1.5399	1.6412	0.9798	1.035	0.9905	1.0011	0.9909	0.9982	0.9903	0.9978	0.9902	0.9976	0.99	0.9974	0.99
pdb|1cbfA01	CATH	train	56	1300	2.2487	1.9463	1.0461	1.0651	1.0216	1.0389	1.0402	1.0556	1.0607	1.0741	1.0862	1.0977	1.1025	1.1097	1.1149
pdb|1cbfA02	CATH	train	48	1270	1.3119	1.492	0.9699	1.0236	0.9906	0.9929	0.9835	0.9793	0.9756	0.9693	0.9578	0.9501	0.9383	0.9266	0.9127
pdb|1cbyA00	CATH	test	89	1540	6.1335	4.3189	1.7982	1.5399	1.1965	1.1194	1.0378	1.0077	0.9799	0.9637	0.9507	0.9417	0.9358	0.9301	0.924
pdb|1cc1L00	CATH	train	236	2536	21.7126	16.2609	6.1485	5.2819	3.1695	2.9084	2.1622	2.053	1.7192	1.6626	1.486	1.4438	1.3488	1.3214	1.263
pdb|1cc5A00	CATH	train	39	1032	1.1412	1.353	0.9648	1.0122	0.9896	0.9954	0.9925	0.9924	0.9924	0.9924	0.9924	0.9924	0.9924	0.9924	0.9924
pdb|1cc8A00	CATH	train	33	828	1.0578	1.219	0.974	1.0164	0.9883	1.0109	0.9899	1.0109	0.9922	1.0106	0.9921	1.0103	0.9918	1.0103	0.9918
pdb|1ccvA00	CATH	test	21	352	0.9491	1.1695	0.981	1.0012	0.9973	1.0006	1.0012	1.0027	1.0023	1.0036	1.0027	1.0042	1.003	1.0044	1.0031
pdb|1ccwA00	CATH	train	70	632	7.9645	6.1795	2.9205	2.2872	1.7084	1.474	1.3026	1.204	1.1385	1.0966	1.0667	1.0458	1.0314	1.0221	1.0154
pdb|1ccwB01	CATH	train	186	1422	19.5676	17.131	6.8944	6.0499	3.8127	3.4395	2.6596	2.4385	2.0871	1.9376	1.7489	1.6402	1.5289	1.4557	1.3884
pdb|1ccwB02	CATH	train	40	556	2.9498	2.2368	1.1974	1.0961	1.0234	1.006	0.9928	0.9816	0.9727	0.9679	0.964	0.9615	0.9608	0.9608	0.9608
pdb|1cczA01	CATH	test	43	662	2.453	2.1305	1.1057	1.0693	0.9992	0.9899	0.9773	0.9739	0.9705	0.9671	0.9644	0.9593	0.9575	0.9565	0.9563
pdb|1cczA02	CATH	train	45	770	2.6074	2.2505	1.1511	1.0879	1.0071	0.9903	0.9723	0.9672	0.9656	0.9654	0.9654	0.9654	0.9654	0.9654	0.9654
pdb|1cd9B02	CATH	train	53	910	2.9453	2.5188	1.1804	1.1362	1.0115	0.9961	0.9715	0.9637	0.9551	0.9527	0.952	0.952	0.952	0.952	0.952
pdb|1cd9D01	CATH	train	41	858	1.4281	1.6923	0.9704	1.0511	0.9982	1.0182	1.0209	1.0289	1.035	1.046	1.0564	1.0664	1.0721	1.0816	1.085
pdb|1cdcA00	CATH	test	51	976	2.9683	2.2658	1.1655	1.0777	1.0047	0.9847	0.9647	0.9551	0.9486	0.948	0.948	0.948	0.948	0.948	0.948
pdb|1cdzA00	CATH	train	46	1020	1.8112	1.7585	1.0352	1.03	1.0096	1.0092	1.0092	1.0092	1.0092	1.0092	1.0092	1.0092	1.0092	1.0092	1.0092
pdb|1ceeB00	CATH	train	39	926	1.5365	1.5658	1.0036	1.0342	1.0114	1.0165	1.0135	1.0152	1.0135	1.0152	1.0135	1.0152	1.0135	1.0152	1.0135
pdb|1ceoA00	CATH	train	158	1590	18.108	13.8707	6.0944	4.5937	3.0809	2.4733	1.9978	1.7333	1.5455	1.4249	1.3393	1.2818	1.2437	1.2178	1.1983
pdb|1ceuA00	CATH	test	31	660	1.2948	1.334	0.9981	1.0198	1.0087	1.0099	1.0106	1.0132	1.014	1.0135	1.0109	1.0105	1.0097	1.01	1.01
pdb|1cexA00	CATH	train	65	858	4.2843	3.5237	1.5195	1.4252	1.134	1.0972	1.0272	1.0079	0.9828	0.9703	0.9553	0.9475	0.9343	0.9269	0.9193
pdb|1cf4B00	CATH	train	25	474	1.1087	1.2696	0.9634	1.0168	0.9881	0.9915	0.9851	0.9855	0.9831	0.9827	0.9827	0.9827	0.9827	0.9827	0.9827
pdb|1cf7A00	CATH	train	44	590	4.3961	3.2427	1.7711	1.4587	1.2446	1.1567	1.1045	1.0793	1.0639	1.0575	1.0506	1.0486	1.0456	1.0452	1.0444
pdb|1cf7B00	CATH	test	37	624	1.939	1.875	1.076	1.0775	1.0073	1.0082	1.0002	0.9962	0.9969	0.9927	0.9965	0.9916	0.9954	0.9915	0.9954
pdb|1cfaA00	CATH	train	36	666	1.8304	1.7226	1.0626	1.0467	1.0123	1.019	1.0225	1.0279	1.033	1.0358	1.0387	1.0409	1.0426	1.0436	1.0437
pdb|1cfbA01	CATH	train	44	766	2.3644	2.089	1.1126	1.0852	1.0149	1.0091	0.9981	0.9922	0.9865	0.9805	0.975	0.9677	0.9606	0.9542	0.9474
pdb|1cfbA02	CATH	train	41	816	1.454	1.6708	0.9801	1.0418	1.002	1.0208	1.0221	1.0377	1.0436	1.0518	1.0576	1.0657	1.0732	1.0842	1.0904
pdb|1cfeA00	CATH	test	53	952	3.1197	2.5632	1.2205	1.1427	1.025	1.0132	0.995	1.0002	0.9908	0.9974	0.9898	0.996	0.9892	0.9958	0.9887
pdb|1cfrA00	CATH	train	136	1516	14.5628	10.5502	4.3206	3.0379	2.0159	1.6073	1.3308	1.185	1.0893	1.0332	0.9981	0.9741	0.9595	0.9519	0.9472
pdb|1cfzA00	CATH	train	69	1258	2.5037	2.2729	0.8986	1.1896	0.9319	1.0775	0.9855	1.059	1.0188	1.0588	1.0388	1.0609	1.0507	1.0617	1.058
pdb|1cg2A01	CATH	train	133	1770	11.6172	8.2868	3.1922	2.4372	1.6786	1.4471	1.2652	1.1986	1.1571	1.1413	1.1367	1.1423	1.1493	1.1594	1.1708
pdb|1cg2A02	CATH	test	55	1258	2.0563	1.9522	1.0356	1.0452	0.9913	0.9932	0.9869	0.9863	0.985	0.9845	0.9841	0.9841	0.9841	0.9841	0.9841
pdb|1cg5A00	CATH	train	66	1420	3.3046	2.5236	1.1706	1.1013	1.0283	1.0308	1.0334	1.0448	1.0523	1.0638	1.072	1.0856	1.0937	1.098	1.1024
pdb|1cg5B00	CATH	train	73	1620	3.687	2.7887	1.2206	1.1313	1.0437	1.0498	1.0533	1.0698	1.0835	1.0977	1.1054	1.1129	1.1163	1.1231	1.1257
pdb|1cgmE00	CATH	train	71	1772	2.2696	2.1485	1.0563	1.0856	1.0396	1.0708	1.0731	1.0897	1.0916	1.0938	1.0938	1.0938	1.0938	1.0938	1.0938
pdb|1chcA00	CATH	test	35	844	1.1101	1.3167	0.9683	0.9997	0.9757	0.9747	0.9684	0.9664	0.9616	0.9606	0.9586	0.9585	0.9585	0.9585	0.9585
pdb|1chdA00	CATH	train	84	1128	7.066	4.7701	1.9718	1.5678	1.2096	1.11	1.0297	0.996	0.9713	0.9573	0.9437	0.9351	0.9254	0.9174	0.9073
pdb|1chkA01	CATH	train	66	1224	4.0306	3.0157	1.33	1.1798	1.0456	1.0269	1.0032	1.0018	0.9922	0.995	0.9889	0.9936	0.9883	0.993	0.988
pdb|1chkA02	CATH	train	47	1056	2.078	1.8112	1.0502	1.0396	1.0063	1.007	1.0068	1.0068	1.0068	1.0068	1.0068	1.0068	1.0068	1.0068	1.0068
pdb|1chmA01	CATH	test	78	1306	6.1115	4.2281	1.8559	1.5276	1.2393	1.1542	1.091	1.064	1.0456	1.0373	1.0304	1.028	1.0249	1.0241	1.0225
pdb|1chmA02	CATH	train	118	1742	8.8438	5.7309	2.0808	1.6467	1.2322	1.1528	1.0898	1.0885	1.087	1.0996	1.1111	1.1302	1.1492	1.1657	1.1806
pdb|1chrA02	CATH	train	84	1754	3.7847	3.0863	1.2302	1.1568	1.0466	1.0539	1.0565	1.0716	1.0874	1.108	1.1284	1.1442	1.1492	1.1496	1.1496
pdb|1chuA01	CATH	train	109	2108	5.8042	4.1798	1.4511	1.3134	1.0321	1.0049	0.9478	0.9369	0.9189	0.9152	0.9087	0.9041	0.8983	0.8966	0.8944
pdb|1chuA02	CATH	test	47	1288	1.4155	1.5007	0.9863	1.0229	1.0058	1.0119	1.0124	1.0137	1.0132	1.0143	1.0137	1.0143	1.0137	1.0143	1.0137
pdb|1chuA03	CATH	train	42	1144	1.2016	1.379	0.9761	1.0285	1.009	1.0291	1.0387	1.0615	1.0745	1.0909	1.0973	1.1024	1.1037	1.1044	1.1044
pdb|1ci4A00	CATH	train	45	1200	1.8085	1.5812	1.0545	1.0496	1.0313	1.0496	1.0584	1.061	1.0612	1.0612	1.0612	1.0612	1.0612	1.0612	1.0612
pdb|1ci6A00	CATH	train	35	936	1.1881	1.2479	0.984	1.0219	1.0153	1.0336	1.0437	1.0525	1.0556	1.0565	1.0566	1.0566	1.0566	1.0566	1.0566
pdb|1ci6B00	CATH	test	35	944	1.2124	1.2373	0.9897	1.0229	1.0206	1.042	1.0529	1.054	1.054	1.0537	1.0537	1.0537	1.0537	1.0537	1.0537
pdb|1ci9A00	CATH	train	163	1594	12.0564	7.6503	2.5377	2.4861	1.3779	1.4808	1.1181	1.1847	1.0389	1.0842	1.022	1.0464	1.0124	1.0277	1.0097
pdb|1cidA01	CATH	train	53	1122	3.0501	2.1956	1.1531	1.0811	1.0148	1.0191	1.0165	1.0343	1.0369	1.058	1.0701	1.086	1.0957	1.0987	1.0999
pdb|1cidA02	CATH	train	44	1092	1.7989	1.6165	1.0244	1.0228	0.9989	1.0003	1.0001	1.0004	1.0008	1.0014	1.0014	1.0014	1.0014	1.0014	1.0014
pdb|1ciiA01	CATH	test	164	1790	17.2922	12.9168	5.6211	4.0991	2.7363	2.1616	1.7442	1.5137	1.351	1.2492	1.18	1.1328	1.0972	1.0739	1.0555
pdb|1ciiA02	CATH	train	47	1180	1.7367	1.6417	1.0103	1.0146	0.9735	0.9659	0.9526	0.944	0.9398	0.9386	0.9371	0.937	0.9369	0.9369	0.9369
pdb|1ciiA03	CATH	train	69	1390	4.607	2.9348	1.3423	1.1726	1.0315	1.0009	0.9733	0.9566	0.9418	0.9301	0.9162	0.9034	0.8907	0.8781	0.872
pdb|1cipA01	CATH	train	93	1706	6.2605	4.1555	1.664	1.3522	1.1253	1.0971	1.0693	1.089	1.0918	1.0936	1.094	1.094	1.094	1.094	1.094
pdb|1cipA02	CATH	test	58	1498	2.0755	1.8345	1.0294	1.0552	1.0269	1.0469	1.058	1.0739	1.0839	1.0932	1.1026	1.1112	1.1149	1.1172	1.1193
pdb|1cixA00	CATH	train	15	186	0.8059	1.1736	0.9576	1.0142	0.995	1.003	1.0021	1.005	1.0054	1.0056	1.0056	1.006	1.0063	1.0063	1.0069
pdb|1ciyA01	CATH	train	87	542	9.6627	8.3932	4.1227	3.7131	2.7724	2.5196	2.1768	2.0144	1.8463	1.7393	1.6392	1.5657	1.5013	1.4487	1.4016
pdb|1ciyA02	CATH	train	74	698	5.6809	5.1844	2.0607	1.8785	1.3674	1.2834	1.1513	1.1097	1.0667	1.0469	1.0299	1.0215	1.0138	1.0103	1.0075
pdb|1ciyA03	CATH	test	61	760	3.2412	3.5615	1.2288	1.5114	1.0589	1.1654	1.0249	1.057	0.9985	1.0038	0.9784	0.972	0.9581	0.953	0.9443
pdb|1cjaA01	CATH	train	70	996	3.5295	3.2116	1.1679	1.2784	1.0053	1.0664	1.0149	1.0407	1.0348	1.052	1.0553	1.0674	1.0709	1.0796	1.0842
pdb|1cjaA02	CATH	train	89	1266	5.99	5.0581	1.7828	1.6221	1.173	1.1452	1.0686	1.0724	1.0597	1.0652	1.0675	1.0752	1.0778	1.0839	1.0856
pdb|1cjcA01	CATH	train	104	1632	6.465	5.0934	1.6774	1.462	1.1056	1.0519	0.9895	0.971	0.9605	0.9577	0.9572	0.9572	0.9572	0.9572	0.9572
pdb|1cjwA00	CATH	test	66	1374	2.3113	2.4567	1.0105	1.1118	0.9691	0.9852	0.9446	0.9413	0.9254	0.9262	0.9196	0.9194	0.9194	0.9194	0.9194
pdb|1cjxA01	CATH	train	79	1590	4.2811	3.318	1.2512	1.2075	1.035	1.0525	1.0408	1.0561	1.0572	1.0631	1.0701	1.0767	1.0808	1.0838	1.0852
pdb|1cjxB02	CATH	train	98	1906	5.7622	4.3171	1.5354	1.3619	1.089	1.0598	1.0283	1.0202	1.0171	1.0163	1.0158	1.0158	1.0158	1.0158	1.0158
pdb|1cjyB02	CATH	train	226	2838	18.8671	12.8262	4.3758	3.5807	2.0317	1.8569	1.3898	1.342	1.1718	1.1588	1.0896	1.0874	1.0576	1.0587	1.0459
pdb|1ckaA00	CATH	test	25	308	1.7928	1.7394	1.0525	1.0688	1.0025	1.0066	0.9957	0.9962	0.9948	0.9948	0.9948	0.9948	0.9948	0.9948	0.9948
pdb|1ckeA00	CATH	train	96	676	9.0867	7.4668	2.9841	3.0334	1.8651	1.9826	1.4823	1.559	1.304	1.3385	1.2022	1.2168	1.1376	1.14	1.0945
pdb|1ckiA01	CATH	train	31	402	2.1988	1.9601	1.1148	1.076	1.0159	1.0146	1.0112	1.0177	1.0221	1.0267	1.0305	1.0332	1.0343	1.0347	1.0349
pdb|1ckmA01	CATH	train	59	600	3.8875	3.1491	1.2737	1.3234	1.0403	1.0713	1.0063	1.0196	1.003	1.0089	1.0004	1.0057	0.999	1.005	0.999
pdb|1ckmA02	CATH	test	42	606	2.7502	2.4042	1.1734	1.1333	1.0275	1.0192	1.0056	1.0041	1.0021	1.0021	1.0016	1.0014	1.0012	1.0001	0.9998
pdb|1ckmA03	CATH	train	27	448	1.2379	1.3759	0.9772	1.0165	0.9945	0.999	0.998	0.9985	0.9986	0.9987	0.9987	0.9987	0.9987	0.9987	0.9987
pdb|1cksB00	CATH	train	41	542	3.625	2.7222	1.4272	1.2407	1.094	1.0505	1.0194	1.0053	0.9951	0.9898	0.9857	0.9837	0.9831	0.9825	0.9824
pdb|1cktA00	CATH	train	40	628	2.6126	2.3814	1.2147	1.1508	1.0432	1.03	1.0211	1.0199	1.0181	1.0177	1.0176	1.0176	1.0176	1.0176	1.0176
pdb|1ckvA00	CATH	test	74	884	7.1432	5.2843	2.2898	1.8262	1.3874	1.2437	1.1425	1.093	1.0606	1.0436	1.0327	1.0252	1.0196	1.0168	1.0146
pdb|1cl4A00	CATH	train	16	204	1.0224	1.1546	0.9958	1.0035	0.9944	0.9939	0.9906	0.9901	0.9903	0.99	0.99	0.99	0.99	0.99	0.99
pdb|1cl8A00	CATH	train	127	726	16.958	16.0956	7.9947	7.1869	5.3272	4.7776	4.0938	3.738	3.3969	3.162	2.9565	2.793	2.6514	2.5293	2.4244
pdb|1clcA01	CATH	train	48	434	4.8653	3.9532	1.7793	1.5613	1.2223	1.15	1.0773	1.0541	1.0362	1.0314	1.0284	1.0307	1.0318	1.0331	1.0348
pdb|1clcA02	CATH	test	175	1174	18.5151	16.6419	6.8184	6.0341	3.8239	3.3608	2.59	2.3141	1.9742	1.8097	1.6338	1.5325	1.4351	1.3715	1.3125
pdb|1cmbA00	CATH	train	54	640	4.2652	3.5152	1.5349	1.3167	1.1016	1.051	1.0141	0.9956	0.9814	0.9728	0.968	0.9678	0.9678	0.9678	0.9678
pdb|1cmxA00	CATH	train	93	978	6.6922	5.551	1.8649	1.9163	1.2663	1.2768	1.0991	1.0889	1.0272	1.0131	0.9864	0.9713	0.9516	0.9396	0.9256
pdb|1cnt300	CATH	train	97	1312	6.722	5.3396	1.8853	1.5586	1.176	1.1033	1.0447	1.0324	1.0258	1.0272	1.0263	1.0272	1.0273	1.0275	1.0275
pdb|1cnvA00	CATH	test	127	1806	8.543	7.167	2.2969	1.9347	1.317	1.2223	1.1179	1.1067	1.0941	1.0983	1.1014	1.1041	1.1051	1.1053	1.1053
pdb|1cnzA00	CATH	train	163	2408	9.9665	7.7519	2.1814	1.9097	1.2363	1.171	1.04	1.0136	0.9768	0.9651	0.9543	0.9512	0.9479	0.9476	0.9458
pdb|1co4A00	CATH	train	28	376	1.9887	1.7044	1.0785	1.042	1.0091	1.0057	1.0048	1.0051	1.0049	1.0049	1.0049	1.0049	1.0049	1.0049	1.0049
pdb|1colA00	CATH	train	94	756	9.9729	8.3257	3.4918	2.9495	1.9763	1.7281	1.437	1.3211	1.2132	1.1603	1.1182	1.0938	1.0804	1.0673	1.062
pdb|1couA00	CATH	test	52	638	4.2507	3.7501	1.6083	1.4696	1.166	1.1157	1.0483	1.0302	1.0134	1.0067	1.0018	0.9997	0.998	0.9972	0.9967
pdb|1cozA00	CATH	train	65	856	4.3834	3.5472	1.3937	1.3107	1.055	1.0487	1.0035	1.0066	0.9967	0.9984	0.9964	0.9964	0.9964	0.9964	0.9964
pdb|1cp2A00	CATH	train	124	1346	11.7998	9.1587	3.5248	2.7819	1.8592	1.5857	1.3397	1.2259	1.1349	1.0804	1.0376	1.0058	0.9772	0.9534	0.9356
pdb|1cpqA00	CATH	train	57	1032	2.3829	2.3616	1.0781	1.0787	1.0009	0.9982	0.9902	0.9891	0.9881	0.9877	0.9877	0.9877	0.9877	0.9877	0.9877
pdb|1cptA00	CATH	test	186	1800	16.4887	12.0659	4.2518	3.637	2.1455	1.95	1.5013	1.4117	1.2429	1.1902	1.1146	1.0864	1.0479	1.0286	1.0058
pdb|1cpyA01	CATH	train	154	2146	9.7174	8.0925	2.3874	2.0383	1.3133	1.198	1.0477	0.9986	0.9528	0.9258	0.9014	0.8823	0.8672	0.8579	0.8518
pdb|1cpyA02	CATH	train	25	386	1.1738	1.4124	0.982	1.0243	0.9989	1.0038	1.0009	1.003	1.002	1.0034	1.0026	1.0037	1.0028	1.0037	1.0031
pdb|1cq3A00	CATH	train	111	842	15.4065	13.9848	7.3794	6.1613	4.6427	4.0035	3.4315	3.0815	2.7954	2.5865	2.4138	2.2739	2.1554	2.0532	1.9664
pdb|1cq4A00	CATH	test	19	274	0.9962	1.1895	0.9854	1.0074	0.9986	1.0016	0.9994	1.0019	0.9996	1.0021	0.9996	1.0021	0.9996	1.0021	0.9996
pdb|1cqmA00	CATH	train	46	430	3.9071	3.3258	1.5639	1.5216	1.1807	1.1614	1.0598	1.0513	1.0142	1.0077	0.9924	0.9892	0.982	0.98	0.9771
pdb|1cqqA01	CATH	train	42	514	3.1527	2.6635	1.3353	1.2101	1.0692	1.0387	1.016	1.0086	1.0006	0.9999	0.9974	0.9983	0.9959	0.9969	0.9951
pdb|1cqqA02	CATH	train	43	646	2.1888	2.3682	1.1255	1.1476	1.0224	1.0261	1.0087	1.0108	1.0076	1.0094	1.0075	1.0093	1.0074	1.0092	1.0074
pdb|1cqxA01	CATH	test	67	838	4.4058	3.3874	1.3233	1.3314	1.0513	1.0691	1.0138	1.0221	1.0087	1.0142	1.0101	1.0143	1.0109	1.0149	1.0109
pdb|1cqxA02	CATH	train	52	874	2.3715	2.2301	1.0491	1.1047	1.0073	1.0321	1.0255	1.0406	1.0455	1.0514	1.0572	1.0603	1.0612	1.0612	1.0612
pdb|1cqxA03	CATH	train	77	1110	5.3036	3.6196	1.3858	1.3241	1.0584	1.0609	1.0115	1.0184	1.0058	1.011	1.0059	1.01	1.0056	1.01	1.0056
pdb|1cr2A00	CATH	train	124	1590	9.4302	6.9176	2.3534	1.9559	1.3324	1.2409	1.1171	1.1027	1.08	1.0889	1.0912	1.1038	1.1165	1.1266	1.1345
pdb|1cr5A01	CATH	test	34	650	1.4272	1.5467	0.9954	1.0276	1.0019	1.0097	1.0086	1.0148	1.0214	1.0264	1.0333	1.0414	1.0494	1.0568	1.0634
pdb|1cr5B02	CATH	train	49	770	3.6305	2.7003	1.3152	1.1777	1.0494	1.0302	1.0146	1.0114	1.0079	1.0072	1.0069	1.0069	1.0069	1.0069	1.0069
pdb|1cruA00	CATH	train	183	1564	20.4701	18.4888	8.2841	7.0019	4.7966	4.0798	3.312	2.9154	2.5597	2.3268	2.1298	1.9858	1.865	1.7693	1.6895
pdb|1cs1A01	CATH	train	93	1296	4.7887	4.0386	1.3543	1.3828	1.0869	1.0842	1.0423	1.0507	1.0498	1.0582	1.0626	1.0673	1.0741	1.0812	1.0966
pdb|1cs1A02	CATH	test	62	1108	3.1054	2.5207	1.1346	1.1001	1.0154	1.0221	1.0146	1.0218	1.0213	1.0233	1.0239	1.0238	1.0239	1.0238	1.0239
pdb|1cs3A00	CATH	train	47	984	1.88	1.862	1.0305	1.0446	0.9949	0.998	0.9843	0.9877	0.9755	0.9775	0.9678	0.9665	0.96	0.9581	0.9523
pdb|1cs6A01	CATH	train	41	910	1.4371	1.5973	0.9904	1.031	1.0039	1.0147	1.0196	1.032	1.0381	1.0495	1.0603	1.0697	1.0788	1.0896	1.0947
pdb|1cs6A02	CATH	train	41	942	1.4172	1.5605	0.9898	1.0129	0.9739	0.9723	0.9586	0.9576	0.9556	0.9556	0.9556	0.9556	0.9556	0.9556	0.9556
pdb|1cs6A03	CATH	test	46	1018	2.0235	1.8473	1.0484	1.0548	1.0136	1.0159	1.0159	1.0156	1.0156	1.0156	1.0156	1.0156	1.0156	1.0156	1.0156
pdb|1cs6A04	CATH	train	46	1076	1.7053	1.7053	1.0069	1.0373	1.0008	1.0037	1.0032	1.0032	1.0032	1.0032	1.0032	1.0032	1.0032	1.0032	1.0032
pdb|1cscA02	CATH	train	44	1088	1.3556	1.5162	0.9805	1.027	0.9987	1.007	1.0033	1.0059	1.0045	1.005	1.0049	1.0049	1.0049	1.0049	1.0049
pdb|1cseI00	CATH	train	34	816	1.1761	1.3168	0.9769	1.0168	0.9976	1.0063	1.0078	1.0089	1.0122	1.0156	1.0229	1.0252	1.0267	1.0268	1.0265
pdb|1cshA01	CATH	test	142	1410	16.4869	11.869	5.2504	3.8806	2.686	2.203	1.8427	1.6357	1.4899	1.3891	1.3132	1.2574	1.2153	1.1826	1.1565
pdb|1ct5A00	CATH	train	135	1912	10.1484	8.4826	2.9811	2.3479	1.5677	1.3511	1.1663	1.0839	1.0285	0.9996	0.9809	0.9696	0.9622	0.9584	0.9567
pdb|1ct9A01	CATH	train	91	1624	4.6508	3.8019	1.3929	1.3061	1.0672	1.064	1.0272	1.0345	1.0306	1.0314	1.0314	1.0314	1.0314	1.0314	1.0314
pdb|1ct9B02	CATH	train	149	2198	11.2399	7.4264	2.5094	1.951	1.3257	1.2006	1.0708	1.0328	1.0008	0.9905	0.9829	0.9799	0.9761	0.9756	0.9744
pdb|1ctfA00	CATH	test	41	904	1.7468	1.6007	0.9934	1.041	0.9947	1.0043	0.997	0.9994	0.9972	0.9992	0.9972	0.9992	0.9972	0.9992	0.9972
pdb|1ctjA00	CATH	train	34	842	1.0029	1.2765	0.9687	1.0122	0.993	0.994	0.9916	0.9916	0.9916	0.9916	0.9916	0.9916	0.9916	0.9916	0.9916
pdb|1cttA01	CATH	train	73	1068	5.3206	3.8348	1.728	1.6378	1.2187	1.224	1.0995	1.1057	1.0677	1.0748	1.0624	1.0698	1.0685	1.0774	1.0825
pdb|1cttA02	CATH	train	49	1012	2.0182	1.8141	1.0081	1.0513	0.9931	1.0125	0.9927	1.0087	0.9936	1.0075	0.9949	1.0082	0.9954	1.0083	0.9955
pdb|1cukA01	CATH	test	29	624	1.0212	1.2164	0.9728	1.0064	0.984	0.9849	0.9744	0.9745	0.9726	0.9726	0.9726	0.9726	0.9726	0.9726	0.9726
pdb|1cukA02	CATH	train	37	676	2.034	1.8403	1.1265	1.1164	1.0393	1.0443	1.0345	1.0434	1.0455	1.0497	1.0514	1.0547	1.0547	1.055	1.055
pdb|1cukA03	CATH	train	22	370	1.0017	1.1828	0.9773	1.0099	0.9968	1.0007	0.9992	1.0006	0.9992	1.0006	0.9992	1.0006	0.9992	1.0006	0.9992
pdb|1cunA01	CATH	train	44	502	4.484	3.5372	1.8101	1.5131	1.2493	1.1513	1.0809	1.0428	1.0167	0.9992	0.9851	0.9752	0.9672	0.9621	0.9592
pdb|1cunA02	CATH	test	48	632	3.6817	3.1042	1.4468	1.2783	1.0984	1.057	1.0297	1.0215	1.0204	1.0195	1.0236	1.0262	1.0296	1.0351	1.0405
pdb|1cvjA01	CATH	train	52	790	3.5665	2.8655	1.2925	1.177	1.0372	1.01	0.9933	0.989	0.9871	0.987	0.987	0.987	0.987	0.987	0.987
pdb|1cvjG02	CATH	train	55	936	3.4634	2.8757	1.2936	1.1902	1.0517	1.0352	1.0225	1.0204	1.0188	1.0191	1.0188	1.0187	1.0186	1.0186	1.0186
pdb|1cvjH02	CATH	train	32	562	1.605	1.5356	1.0176	1.0198	0.9976	0.9978	0.9982	0.9985	0.9985	0.9985	0.9985	0.9985	0.9985	0.9985	0.9985
pdb|1cvrA01	CATH	test	61	754	5.575	3.9919	1.7841	1.4724	1.1938	1.117	1.0619	1.0436	1.031	1.0283	1.0235	1.024	1.0229	1.0231	1.0235
pdb|1cvrA02	CATH	train	99	1142	8.1994	6.5293	2.441	2.029	1.3981	1.2625	1.1141	1.0575	1.0068	0.9825	0.9609	0.945	0.9319	0.9216	0.912
pdb|1cvrA03	CATH	train	47	824	2.3805	2.1219	1.0857	1.0686	0.9983	0.993	0.9833	0.9824	0.9821	0.9821	0.9821	0.9821	0.9821	0.9821	0.9821
pdb|1cvuA01	CATH	train	16	212	0.8419	1.189	0.9593	1.0168	0.9955	1.0069	1.0022	1.0066	1.0047	1.0071	1.0074	1.0079	1.0081	1.0085	1.0085
pdb|1cw5A00	CATH	test	20	232	1.1924	1.4428	0.966	1.0595	0.9878	1.0105	0.9941	1.0014	0.9975	0.999	0.9982	0.9982	0.9982	0.9982	0.9982
pdb|1cwvA02	CATH	train	39	348	3.5755	3.1001	1.4889	1.3866	1.1404	1.1032	1.0428	1.0292	1.0074	1.0025	0.9937	0.991	0.987	0.985	0.9826
pdb|1cwvA03	CATH	train	39	446	2.355	2.4317	1.1241	1.1929	1.0177	1.0375	1.005	1.0178	1.0103	1.0178	1.0167	1.0208	1.021	1.0235	1.0237
pdb|1cwvA04	CATH	train	43	586	2.8992	2.8115	1.296	1.2433	1.0653	1.0486	1.0171	1.0117	1.0044	1.003	1.0024	1.0022	1.0023	1.0022	1.0023
pdb|1cwvA05	CATH	test	38	622	1.8864	2.045	1.0806	1.0889	1.0073	1.0066	0.995	0.9952	0.9912	0.991	0.9895	0.9889	0.9884	0.9878	0.9878
pdb|1cwxA00	CATH	train	21	326	1.1884	1.326	1.0099	1.0135	0.9956	0.9915	0.9858	0.9841	0.9829	0.9816	0.9814	0.9814	0.9814	0.9814	0.9814
pdb|1cx1A00	CATH	train	68	584	7.7815	6.0842	2.7662	2.2063	1.6138	1.408	1.2471	1.1682	1.1119	1.0822	1.0593	1.0472	1.0396	1.0345	1.0317
pdb|1cxqA00	CATH	train	69	824	4.0743	3.6456	1.387	1.3353	1.0798	1.0592	1.0136	1.009	0.994	0.9941	0.9892	0.9889	0.987	0.9873	0.986
pdb|1cxyA00	CATH	test	45	668	2.7691	2.3946	1.1663	1.1201	1.024	1.0283	1.0221	1.0291	1.03	1.033	1.0331	1.0332	1.0332	1.0332	1.0332
pdb|1cxzB00	CATH	train	53	828	3.39	2.822	1.2507	1.1965	1.0341	1.0289	1.0061	1.006	1.0023	1.0025	1.002	1.002	1.002	1.002	1.002
pdb|1cy5A00	CATH	train	46	882	1.7855	1.8796	0.9761	1.0728	0.981	1.0112	0.9931	1.0018	0.9968	0.9968	0.9968	0.9968	0.9968	0.9968	0.9968
pdb|1cydA00	CATH	train	105	1252	8.0369	5.601	2.0823	1.8774	1.2991	1.2611	1.1182	1.1155	1.0805	1.0909	1.0848	1.0966	1.0984	1.1061	1.1108
pdb|1cyoA00	CATH	test	50	1068	2.311	2.0792	1.0625	1.0722	0.9903	0.9815	0.9573	0.9458	0.9326	0.9234	0.9187	0.918	0.918	0.918	0.918
pdb|1cyxA00	CATH	train	70	1246	2.9972	2.5191	1.0261	1.1897	0.9838	1.0694	1.0141	1.0599	1.0417	1.0664	1.0577	1.0699	1.0685	1.0708	1.0708
pdb|1cz3B00	CATH	train	72	1490	3.6081	2.7827	1.1978	1.1398	0.9935	0.9746	0.9424	0.935	0.9235	0.9224	0.9212	0.9212	0.9212	0.9212	0.9212
pdb|1cz4A01	CATH	train	50	1278	1.7917	1.7694	1.0093	1.036	1.0175	1.0244	1.0248	1.0248	1.0248	1.0248	1.0248	1.0248	1.0248	1.0248	1.0248
pdb|1cz4A02	CATH	test	43	1106	1.3845	1.4991	0.9799	1.0078	0.9704	0.9585	0.9452	0.9379	0.936	0.936	0.936	0.936	0.936	0.936	0.936
pdb|1czaN03	CATH	train	84	1376	7.0316	4.7615	2.1116	1.6702	1.3105	1.177	1.0756	1.0213	0.9773	0.9448	0.9214	0.8987	0.882	0.8749	0.8707
pdb|1czaN04	CATH	train	120	1834	9.3124	6.9071	2.4666	1.981	1.3745	1.2425	1.1265	1.0903	1.0648	1.0536	1.0487	1.0473	1.0471	1.0466	1.0466
pdb|1czjA00	CATH	train	58	1392	2.7029	2.3198	1.1132	1.1043	1.0025	0.9931	0.9705	0.959	0.9425	0.9315	0.9225	0.9178	0.9143	0.9123	0.9111
pdb|1czqA00	CATH	test	28	550	1.3304	1.3124	0.9906	1.0133	1.0014	1.0089	1.0132	1.016	1.0174	1.018	1.018	1.018	1.018	1.018	1.018
pdb|1czyA00	CATH	train	71	788	5.5857	3.9184	1.5664	1.5105	1.1116	1.1386	1.0358	1.0585	1.03	1.0453	1.0368	1.0482	1.0463	1.0529	1.0532
pdb|1d02B00	CATH	train	105	1196	9.8394	7.1759	2.7681	2.1474	1.4703	1.2958	1.1439	1.0867	1.0436	1.0252	1.0116	1.0061	1.0034	1.0011	1.0002
pdb|1d06A00	CATH	train	61	1030	3.5909	2.8345	1.2501	1.1485	1.0262	1.0109	0.9907	0.9812	0.9718	0.9653	0.9591	0.954	0.9505	0.9455	0.9414
pdb|1d0cA01	CATH	test	73	1264	4.1528	3.3945	1.3368	1.263	1.0587	1.0554	1.0321	1.0365	1.037	1.0408	1.0425	1.0458	1.0495	1.0546	1.0598
pdb|1d0cA02	CATH	train	44	924	1.6546	1.7669	0.9925	1.0519	1.0066	1.0276	1.0264	1.0417	1.0464	1.0487	1.0488	1.0488	1.0488	1.0488	1.0488
pdb|1d0cA03	CATH	train	37	810	1.3082	1.4929	0.9766	1.0176	0.9812	0.9795	0.9693	0.9597	0.9467	0.9343	0.9257	0.9165	0.9128	0.911	0.9108
pdb|1d0dA00	CATH	train	39	862	1.8376	1.6623	1.0479	1.0369	1.0063	1.0016	0.9972	0.9962	0.9958	0.9957	0.9957	0.9957	0.9957	0.9957	0.9957
pdb|1d0nA03	CATH	test	60	1020	4.3929	2.9455	1.3574	1.1973	1.0584	1.0391	1.0254	1.033	1.0402	1.0499	1.0621	1.0777	1.0889	1.0984	1.1041
pdb|1d0nA04	CATH	train	58	1150	2.5208	2.3332	1.0919	1.1067	1.0153	1.0266	1.0207	1.0282	1.0297	1.0337	1.036	1.0388	1.04	1.0415	1.0437
pdb|1d0qA00	CATH	train	48	1084	1.9462	1.8009	1.0306	1.043	1.0058	1.0151	1.0126	1.0212	1.0232	1.0342	1.0393	1.0521	1.0613	1.0746	1.0832
pdb|1d1nA00	CATH	train	61	1250	4.1275	2.7871	1.2936	1.1373	1.0127	0.9848	0.9635	0.9585	0.9574	0.9572	0.9572	0.9572	0.9572	0.9572	0.9572
pdb|1d1rA00	CATH	test	46	1182	1.5523	1.6576	0.9983	1.0245	0.9965	0.9986	0.9972	0.9972	0.9972	0.9972	0.9972	0.9972	0.9972	0.9972	0.9972
pdb|1d2fA02	CATH	train	98	1510	6.6211	4.2359	1.6086	1.449	1.0658	1.0656	0.9688	0.97	0.9343	0.9372	0.9217	0.9204	0.9135	0.9122	0.9099
pdb|1d2fB01	CATH	train	61	1400	2.1084	1.9751	0.9775	1.0699	0.9534	0.9831	0.9505	0.9601	0.9498	0.9516	0.9496	0.9496	0.9496	0.9496	0.9496
pdb|1d2jA00	CATH	train	19	292	0.9782	1.1459	0.9876	1.0076	0.9998	1.0027	1.0035	1.0038	1.0038	1.0038	1.0038	1.0038	1.0038	1.0038	1.0038
pdb|1d2nA01	CATH	test	68	566	7.5255	5.8127	2.6152	2.0821	1.5554	1.3689	1.2275	1.1532	1.1019	1.0689	1.046	1.0291	1.016	1.0053	0.9967
pdb|1d2nA02	CATH	train	34	432	2.6949	2.1946	1.2015	1.1112	1.0241	1.0096	0.9954	0.9912	0.9886	0.988	0.9876	0.9875	0.9875	0.9875	0.9875
pdb|1d2oA01	CATH	train	56	644	5.3756	4.3419	1.9792	1.6296	1.2867	1.175	1.0989	1.0631	1.0412	1.0307	1.0259	1.0238	1.0224	1.0223	1.0222
pdb|1d2oA02	CATH	train	38	590	2.2826	2.1545	1.1076	1.1126	1.0119	1.0237	1.0116	1.018	1.0165	1.0211	1.0208	1.0226	1.0226	1.0231	1.0232
pdb|1d2sA00	CATH	test	80	880	6.3588	4.466	1.6922	1.4947	1.1508	1.1013	1.041	1.0272	1.0148	1.0118	1.0092	1.0095	1.0098	1.0101	1.0104
pdb|1d2tA00	CATH	train	87	1192	5.2379	4.4281	1.654	1.5173	1.1666	1.1263	1.0546	1.0437	1.0279	1.0215	1.0177	1.0154	1.0129	1.0117	1.0113
pdb|1d2vC00	CATH	train	194	2014	16.8708	13.3695	4.7911	3.9988	2.463	2.1475	1.6945	1.536	1.3589	1.277	1.1961	1.1471	1.099	1.0726	1.0426
pdb|1d2zA00	CATH	train	49	902	1.9485	1.9339	0.9842	1.0623	0.9911	1.0129	1.008	1.018	1.0238	1.0352	1.0411	1.0517	1.0585	1.0714	1.078
pdb|1d2zB00	CATH	test	70	1124	5.2299	3.7152	1.5353	1.3053	1.0895	1.0479	1.0202	1.0143	1.011	1.0102	1.0101	1.0098	1.0099	1.0098	1.0099
pdb|1d3bB00	CATH	train	45	972	1.9455	1.891	1.0304	1.062	1.0165	1.0323	1.0361	1.0448	1.0494	1.0518	1.0539	1.0545	1.0546	1.0546	1.0546
pdb|1d3bC00	CATH	train	42	952	1.5412	1.6056	0.9834	1.0268	0.9932	1.0078	0.9978	1.0059	0.9994	1.0057	1.0019	1.0058	1.0019	1.0058	1.0019
pdb|1d3cA03	CATH	train	46	1034	2.1004	1.8877	1.0295	1.0649	1.0133	1.0306	1.0336	1.0432	1.0483	1.0529	1.0553	1.0564	1.057	1.0574	1.0577
pdb|1d3gA00	CATH	test	170	1748	17.7397	13.1166	5.5112	4.3006	2.7511	2.2925	1.7923	1.5894	1.3884	1.2928	1.2043	1.1532	1.107	1.0797	1.0559
pdb|1d3yA01	CATH	train	33	734	1.1723	1.3297	0.9766	1.0098	0.9889	0.9907	0.9832	0.983	0.9811	0.981	0.981	0.981	0.981	0.981	0.981
pdb|1d3yB02	CATH	train	99	1108	8.6921	5.6493	2.2611	1.7776	1.2972	1.1733	1.0582	1.0232	0.9841	0.9674	0.9562	0.9508	0.9448	0.9426	0.9422
pdb|1d4bA00	CATH	train	50	930	2.5321	2.1515	1.1008	1.0844	1.0032	0.9999	0.9845	0.9813	0.9755	0.9717	0.9645	0.9595	0.9512	0.9453	0.9392
pdb|1d4oA00	CATH	test	81	1194	6.0982	4.2473	1.7356	1.4618	1.1638	1.0885	1.0248	0.9928	0.9624	0.9441	0.9246	0.9111	0.8993	0.8846	0.8733
pdb|1d4tA00	CATH	train	43	958	1.6437	1.6856	1.0049	1.0404	1.0074	1.0227	1.0272	1.044	1.0521	1.0634	1.0672	1.0716	1.0734	1.074	1.074
pdb|1d4uA00	CATH	train	60	1126	4.5339	2.9827	1.3889	1.1784	1.0526	1.0199	1.0058	1.0019	1.0007	1	1	1	1	1	1
pdb|1d4vA01	CATH	train	21	344	1.0767	1.2029	0.9988	1.0045	0.9939	0.9904	0.9872	0.987	0.987	0.987	0.987	0.987	0.987	0.987	0.987
pdb|1d4vA02	CATH	test	17	236	1.0557	1.1296	0.9983	1.0027	0.9997	1.0002	0.9998	1.0005	1.0001	1.0006	1	1.0005	1	1.0005	1
pdb|1d4xG00	CATH	train	60	474	6.7577	5.4252	2.6164	2.1143	1.5688	1.383	1.2198	1.1482	1.0892	1.0597	1.0363	1.0241	1.013	1.0077	1.0038
pdb|1d5rA01	CATH	train	98	876	11.2525	9.3683	4.0085	3.0539	2.0946	1.7203	1.4463	1.2952	1.1921	1.1266	1.0806	1.0505	1.0277	1.0109	0.9973
pdb|1d5rA02	CATH	train	64	814	3.2033	2.852	1.0603	1.2487	0.9583	1.0617	0.974	1.0292	0.9905	1.0218	1.0018	1.0187	1.0094	1.0179	1.014
pdb|1d5tA01	CATH	test	79	1104	5.7834	5.0619	1.9286	1.6147	1.2258	1.1293	1.0527	1.0186	0.9951	0.9825	0.9763	0.9723	0.9707	0.9703	0.9699
pdb|1d5tA02	CATH	train	65	1198	2.6945	2.7764	1.1638	1.1491	1.0288	1.029	1.0229	1.0282	1.0296	1.0317	1.0347	1.0373	1.0391	1.0414	1.0452
pdb|1d5tA03	CATH	train	55	1088	2.1849	2.1679	1.033	1.0762	1.0163	1.038	1.0421	1.0586	1.0647	1.0687	1.0692	1.0692	1.0692	1.0692	1.0692
pdb|1d5yA02	CATH	train	27	392	1.4597	1.5413	0.978	1.0459	0.9929	1.0043	0.9972	0.9975	0.9962	0.9959	0.9951	0.9923	0.9886	0.983	0.981
pdb|1d5yB03	CATH	test	64	618	6.0306	4.7995	2.0963	1.7596	1.3387	1.2205	1.1194	1.0773	1.0463	1.0294	1.0193	1.014	1.0093	1.0084	1.0064
pdb|1d66B01	CATH	train	31	480	2.2688	1.8333	1.1211	1.0628	1.0167	1.0106	1.0074	1.0066	1.0065	1.0065	1.0065	1.0065	1.0065	1.0065	1.0065
pdb|1d6gA00	CATH	train	24	394	1.0164	1.2878	0.9507	1.0275	0.9939	1.0133	1.0061	1.0135	1.009	1.0137	1.0096	1.0137	1.0096	1.0137	1.0096
pdb|1d7bA00	CATH	train	58	608	4.6589	4.0654	1.7391	1.5782	1.2182	1.1438	1.0606	1.0276	0.9996	0.9842	0.9713	0.9626	0.9572	0.9518	0.9483
pdb|1d7kB01	CATH	test	61	808	4.0702	3.5981	1.506	1.3346	1.1061	1.066	1.0344	1.0332	1.0307	1.0377	1.0428	1.0503	1.0538	1.0559	1.0568
pdb|1d7pM00	CATH	train	75	1076	4.8466	4.0146	1.5211	1.4105	1.1037	1.0799	1.0173	1.0115	0.9924	0.991	0.9841	0.9855	0.9788	0.9796	0.977
pdb|1d7qA00	CATH	train	76	1312	4.5996	3.9307	1.5251	1.3161	1.0881	1.0482	1.0083	0.9902	0.9725	0.9622	0.9563	0.954	0.9554	0.9555	0.9559
pdb|1d8bA00	CATH	train	43	800	1.9717	1.9228	1.0258	1.0569	0.9886	0.9884	0.973	0.9658	0.958	0.9497	0.9464	0.9426	0.9409	0.9399	0.9396
pdb|1d8hA00	CATH	test	141	1390	14.0964	10.8647	4.3136	3.4754	2.2368	1.9206	1.5531	1.4123	1.274	1.2047	1.1467	1.1124	1.0847	1.0679	1.0544
pdb|1d8jA00	CATH	train	44	908	1.9946	1.8902	1.0423	1.0461	0.9906	0.9815	0.9694	0.9674	0.9653	0.9635	0.9632	0.963	0.9629	0.9629	0.9629
pdb|1d8lA01	CATH	train	34	680	1.3068	1.4633	0.9829	1.0231	0.9912	0.9962	0.9914	0.9913	0.9912	0.9912	0.9912	0.9912	0.9912	0.9912	0.9912
pdb|1d8wC00	CATH	train	204	1548	25.016	20.9568	9.8339	8.3246	5.9401	5.1809	4.3397	3.9146	3.5173	3.2568	3.0265	2.8529	2.7032	2.5807	2.4722
pdb|1dabA00	CATH	test	213	2398	14.8645	14.5698	4.6774	4.3074	2.5461	2.2944	1.7811	1.6248	1.4251	1.3321	1.2415	1.1912	1.147	1.1184	1.091
pdb|1daqA00	CATH	train	39	754	2.1958	1.8509	1.1022	1.0609	1.0176	1.0169	1.0124	1.0152	1.0174	1.02	1.022	1.0253	1.0258	1.0245	1.0222
pdb|1darA01	CATH	train	129	1288	12.4416	9.1351	3.5581	2.8858	1.8212	1.6316	1.3272	1.2629	1.1638	1.1411	1.1061	1.101	1.0907	1.09	1.0879
pdb|1darA04	CATH	train	51	940	2.5648	2.1379	1.0866	1.0686	1	0.9991	0.9803	0.982	0.9698	0.9681	0.9603	0.9573	0.9557	0.9551	0.9551
pdb|1darA05	CATH	test	44	942	1.5993	1.645	0.9871	1.0261	0.9834	0.9881	0.9805	0.9811	0.9804	0.9804	0.9804	0.9804	0.9804	0.9804	0.9804
pdb|1dbhA01	CATH	train	109	1354	10.022	6.7028	2.6343	2.0456	1.4215	1.2532	1.0991	1.0421	0.9886	0.9658	0.9469	0.9389	0.9319	0.9285	0.9276
pdb|1dbhA02	CATH	train	68	1272	4.154	3.091	1.336	1.1912	1.0383	0.9997	0.974	0.9596	0.9473	0.9389	0.9332	0.9252	0.9214	0.9197	0.9181
pdb|1dbqA01	CATH	train	64	1356	2.4311	2.253	1.0486	1.0848	0.9856	0.9727	0.9376	0.9229	0.8987	0.889	0.8728	0.8637	0.849	0.8436	0.8374
pdb|1dbqA02	CATH	test	69	1522	3.2676	2.5113	1.1677	1.0845	0.9884	0.9626	0.9345	0.9197	0.9001	0.8894	0.8734	0.8712	0.871	0.871	0.871
pdb|1dbwB00	CATH	train	51	1288	1.4342	1.5894	0.9703	1.021	0.9798	0.9825	0.9582	0.951	0.9367	0.9268	0.9083	0.8917	0.879	0.8655	0.8548
pdb|1dc1A01	CATH	train	121	1744	12.146	8.3256	3.5322	2.5572	1.7911	1.4842	1.2698	1.1559	1.0798	1.031	0.9986	0.9792	0.9646	0.9559	0.9495
pdb|1dc1A02	CATH	train	40	1030	1.2608	1.3667	0.9787	1.0297	1.0238	1.0363	1.04	1.04	1.04	1.04	1.04	1.04	1.04	1.04	1.04
pdb|1dceA01	CATH	test	153	1666	15.1459	10.749	4.4475	3.5093	2.2622	1.9233	1.5237	1.3744	1.2122	1.1373	1.0585	1.016	0.969	0.9389	0.9054
pdb|1dceA02	CATH	train	50	1140	1.857	1.6862	0.9854	1.0435	0.9811	1.0039	0.98	0.9934	0.9784	0.9831	0.9775	0.9778	0.9767	0.9765	0.9765
pdb|1dceA03	CATH	train	58	1276	2.19	1.9177	0.9887	1.0567	0.9692	0.9704	0.9433	0.9295	0.9128	0.8984	0.8812	0.8727	0.8622	0.8545	0.8523
pdb|1dceB00	CATH	train	151	1898	14.4248	9.8632	3.7962	2.7299	1.7779	1.4597	1.2238	1.1133	1.0368	0.9915	0.9612	0.9389	0.9232	0.9099	0.9015
pdb|1dcfA00	CATH	test	64	1508	2.2744	2.0401	1.0153	1.0632	0.9721	0.969	0.9345	0.9182	0.8952	0.8874	0.8744	0.8694	0.8657	0.8646	0.8646
pdb|1dciA01	CATH	train	101	1846	6.7469	4.3532	1.7216	1.4311	1.1485	1.0817	1.0279	1.0098	0.9969	0.9921	0.9891	0.9886	0.9871	0.9873	0.9864
pdb|1dciA02	CATH	train	36	922	1.1624	1.2793	0.9843	1.0202	1.0203	1.0349	1.0447	1.0556	1.0665	1.0716	1.0748	1.0751	1.0752	1.0752	1.0752
pdb|1dcjA00	CATH	train	41	964	1.8267	1.5664	1.0297	1.0315	0.9796	0.9769	0.953	0.95	0.9367	0.9348	0.9298	0.9296	0.9292	0.9292	0.9292
pdb|1dcsA00	CATH	test	138	1536	13.3286	9.44	3.7662	2.8382	1.8636	1.574	1.3229	1.222	1.1473	1.1173	1.0962	1.0902	1.0851	1.0903	1.0975
pdb|1dctA01	CATH	train	88	1488	5.6052	4.1106	1.5579	1.3422	1.0904	1.0354	0.9812	0.9514	0.9252	0.9043	0.8873	0.8697	0.8528	0.8368	0.8287
pdb|1dctA02	CATH	train	69	1450	3.105	2.6422	1.1366	1.1148	1.0062	0.9962	0.9763	0.966	0.9453	0.9319	0.9041	0.8914	0.8731	0.8652	0.8455
pdb|1dd5A01	CATH	train	59	1404	2.6567	2.198	1.1176	1.0545	0.9869	0.9679	0.9558	0.9459	0.9374	0.933	0.9271	0.9237	0.9217	0.921	0.9207
pdb|1dd7A03	CATH	test	28	572	1.1658	1.2275	0.9799	1.0138	1.007	1.0186	1.0207	1.03	1.031	1.031	1.031	1.031	1.031	1.031	1.031
pdb|1dd9A01	CATH	train	54	718	4.6067	3.6017	1.8383	1.5546	1.29	1.1889	1.1119	1.0673	1.0373	1.0193	1.0067	0.9974	0.9915	0.9874	0.9843
pdb|1dd9A02	CATH	train	59	882	3.5637	2.8066	1.2576	1.1793	1.0352	1.0168	0.9897	0.9807	0.9702	0.9659	0.9618	0.9589	0.9548	0.9463	0.9395
pdb|1dd9A03	CATH	train	30	596	1.309	1.3479	0.9974	1.0125	0.9905	0.9888	0.9859	0.9845	0.9816	0.9808	0.9791	0.9786	0.9763	0.9763	0.9763
pdb|1ddbA00	CATH	test	90	958	9.5684	7.451	3.3239	2.6365	1.8379	1.5749	1.3391	1.2351	1.1505	1.1075	1.073	1.054	1.0401	1.0337	1.0264
pdb|1ddfA00	CATH	train	69	1036	5.4389	4.2076	1.7288	1.4216	1.14	1.069	1.0127	0.9882	0.9622	0.9464	0.9359	0.9298	0.9276	0.9271	0.9268
pdb|1ddgA01	CATH	train	68	1234	3.9213	3.2857	1.33	1.2161	1.0445	1.0169	0.9989	0.9947	0.994	0.994	0.994	0.994	0.994	0.994	0.994
pdb|1ddgA02	CATH	train	55	1102	2.1957	2.0503	1.0051	1.0576	0.9723	0.9746	0.9566	0.9492	0.9368	0.9296	0.9236	0.9215	0.9192	0.9157	0.9135
pdb|1ddlA00	CATH	test	66	1262	2.9131	2.6474	1.1212	1.1552	1.0106	1.0257	1.0049	1.0083	1.007	1.007	1.007	1.007	1.007	1.007	1.007
pdb|1ddmA00	CATH	train	73	1484	4.1498	3.2972	1.3621	1.2142	1.057	1.0315	1.0177	1.0149	1.0137	1.0137	1.014	1.014	1.014	1.014	1.014
pdb|1ddwA00	CATH	train	61	1476	2.2508	2.1479	1.0375	1.0646	0.9996	1.0156	0.9953	1.0083	0.9933	1.0054	0.9921	1.005	0.9922	1.005	0.9922
pdb|1ddzA01	CATH	train	111	1870	8.1662	5.2413	2.018	1.6785	1.2623	1.1868	1.0898	1.0599	1.0258	1.0092	0.996	0.988	0.9814	0.9746	0.9701
pdb|1de4C01	CATH	test	151	2416	11.2068	7.5796	2.5712	1.9884	1.3419	1.1985	1.0571	1.0106	0.9719	0.9544	0.9399	0.9315	0.9258	0.9236	0.9206
pdb|1de4C02	CATH	train	77	1962	2.4251	2.3848	1.0391	1.1068	1.0278	1.0637	1.0701	1.0987	1.1184	1.1393	1.1607	1.1803	1.1986	1.2061	1.2132
pdb|1de4C03	CATH	train	62	1810	1.7433	1.8787	0.9925	1.0187	0.9613	0.9568	0.9501	0.95	0.95	0.95	0.95	0.95	0.95	0.95	0.95
pdb|1debB00	CATH	train	31	676	1.191	1.2802	0.9799	1.0204	1.0098	1.0235	1.0328	1.0428	1.0482	1.0511	1.052	1.052	1.052	1.052	1.052
pdb|1deeG00	CATH	test	26	518	1.0996	1.1965	0.9917	1.0065	1.0039	1.0082	1.01	1.0121	1.0127	1.0147	1.0157	1.0166	1.017	1.0191	1.0195
pdb|1dekA01	CATH	train	49	650	3.7622	2.7374	1.3171	1.1936	1.0449	1.0193	0.9901	0.9823	0.9701	0.9663	0.9603	0.959	0.9579	0.9578	0.9576
pdb|1dekA02	CATH	train	60	828	3.9907	3.031	1.3496	1.281	1.0714	1.0755	1.0379	1.0489	1.0439	1.0509	1.0513	1.0566	1.0568	1.0587	1.0588
pdb|1deuB00	CATH	train	113	1280	8.6722	7.2995	2.6147	2.3883	1.5157	1.4592	1.1984	1.1841	1.0925	1.0857	1.0511	1.0484	1.0352	1.0353	1.0297
pdb|1devB00	CATH	test	11	98	0.8531	1.1586	0.9845	1.009	1.0014	1.0035	1.0043	1.0054	1.0068	1.008	1.0082	1.0095	1.0097	1.0102	1.0104
pdb|1df0A02	CATH	train	50	296	6.7506	6.2292	3.457	2.9456	2.3135	2.0265	1.7773	1.6162	1.4868	1.3916	1.317	1.259	1.2118	1.1754	1.1462
pdb|1df0A03	CATH	train	65	536	6.5689	6.2771	2.729	2.2618	1.6255	1.4226	1.2485	1.1659	1.1065	1.0719	1.051	1.0378	1.0302	1.0254	1.0227
pdb|1df7A00	CATH	train	63	720	3.4364	3.3801	1.2901	1.3368	1.0657	1.0725	1.0197	1.0196	1.0056	1.0055	1.0025	1.0027	1.002	1.0012	1.0006
pdb|1dfaA03	CATH	test	53	730	3.0896	3.0888	1.2192	1.2202	1.029	1.0273	1.0036	1.0024	1.002	1.002	1.002	1.002	1.002	1.002	1.002
pdb|1dfcA01	CATH	train	59	898	3.3563	3.2246	1.2625	1.2399	1.0367	1.0257	0.9872	0.975	0.9597	0.9509	0.9442	0.9422	0.9416	0.9416	0.9416
pdb|1dfcA02	CATH	train	64	1068	3.647	3.3418	1.2747	1.2416	1.036	1.0238	0.9936	0.9897	0.9863	0.986	0.986	0.986	0.986	0.986	0.986
pdb|1dfcA03	CATH	train	62	1196	2.5755	2.6928	1.0549	1.1556	0.9927	1.0266	0.9938	1.0149	1.0024	1.0139	1.0077	1.0128	1.0106	1.0126	1.0113
pdb|1dfcA04	CATH	test	59	1274	2.3843	2.5934	1.0239	1.1435	0.9934	1.0087	0.989	0.988	0.988	0.988	0.988	0.988	0.988	0.988	0.988
pdb|1dfmB00	CATH	train	96	1628	6.8439	4.8264	1.7712	1.5085	1.1629	1.1024	1.0528	1.0354	1.0263	1.0229	1.0211	1.0201	1.0194	1.0191	1.0191
pdb|1dfuP00	CATH	train	57	1416	1.8759	2.0477	0.9609	1.0839	1.0037	1.0476	1.0462	1.0625	1.0658	1.0668	1.0668	1.0668	1.0668	1.0668	1.0668
pdb|1dfxA00	CATH	train	57	1490	1.7097	1.8926	0.9475	1.0621	0.9909	1.0301	1.025	1.0431	1.0472	1.0718	1.0736	1.0931	1.0981	1.1044	1.1077
pdb|1dg3A02	CATH	test	115	1918	7.7986	5.7715	2.1747	1.895	1.3298	1.2313	1.0892	1.0488	0.9981	0.9811	0.9581	0.9487	0.9378	0.9317	0.9239
pdb|1dg6A00	CATH	train	71	1754	2.9363	2.6612	1.0409	1.1384	0.9666	0.9829	0.9381	0.9383	0.9263	0.9253	0.9252	0.9252	0.9252	0.9252	0.9252
pdb|1dgnA00	CATH	train	37	708	1.5883	1.6551	0.9403	1.0536	0.9863	1.0078	0.9982	1.0061	1.0038	1.0084	1.0078	1.0107	1.0104	1.0114	1.0107
pdb|1dgsA02	CATH	train	45	796	2.7945	2.3268	1.0937	1.1463	0.9985	1.0212	0.9998	1.006	1.0042	1.0056	1.0054	1.0056	1.0056	1.0056	1.0056
pdb|1dgsA04	CATH	test	37	778	1.358	1.4826	0.952	1.0285	0.9842	0.9889	0.9733	0.9701	0.9644	0.9609	0.96	0.9596	0.9594	0.9594	0.9594
pdb|1dgsA05	CATH	train	43	858	2.411	1.9482	1.0662	1.0734	0.9928	0.9886	0.9686	0.9604	0.9543	0.9534	0.9534	0.9534	0.9534	0.9534	0.9534
pdb|1dgsA06	CATH	train	52	968	3.5461	2.5645	1.1911	1.1612	1.0167	1.0298	1.0076	1.019	1.0205	1.0292	1.0349	1.041	1.0467	1.05	1.0516
pdb|1dgwA00	CATH	train	76	1210	5.052	3.658	1.399	1.3149	1.0585	1.0523	1.0039	1.001	0.9847	0.9784	0.9697	0.9651	0.9569	0.951	0.9453
pdb|1dh3A00	CATH	test	30	562	1.4466	1.4897	0.9828	1.0296	0.9954	1.0015	1.0021	0.9998	1.0025	1.0002	1.0026	1.0003	1.0026	1.0003	1.0026
pdb|1dhnA00	CATH	train	72	804	7.9561	5.5171	2.5148	1.9217	1.4489	1.2778	1.1584	1.1012	1.0619	1.041	1.0244	1.0174	1.0101	1.0081	1.0039
pdb|1di2A00	CATH	train	31	590	1.2795	1.4221	0.9851	1.0246	1.0031	1.0157	1.015	1.0217	1.0239	1.028	1.0309	1.0338	1.0362	1.0373	1.0384
pdb|1di6A00	CATH	train	84	874	6.5198	4.9971	2.0674	2.0944	1.3151	1.4316	1.1058	1.1959	1.0356	1.0955	1.0118	1.0479	1.0044	1.0287	1.0023
pdb|1dihA01	CATH	test	74	1050	3.7077	3.1237	1.2009	1.2497	1.0287	1.0532	1.0205	1.0332	1.0293	1.0351	1.0368	1.0432	1.0452	1.0466	1.0477
pdb|1dihA02	CATH	train	59	1022	2.8166	2.5777	1.1172	1.1334	1.0135	1.0206	1.0124	1.0134	1.0136	1.0136	1.0136	1.0136	1.0136	1.0136	1.0136
pdb|1divA02	CATH	train	49	970	2.2313	2.0942	1.0429	1.0701	1.0014	1.0167	1.0119	1.0176	1.0186	1.0199	1.0207	1.0211	1.0213	1.0216	1.0215
pdb|1dj0A01	CATH	train	65	1140	4.0752	3.0315	1.2676	1.1944	1.0319	1.0257	1.0048	1.0079	1.0015	1.0065	1.0017	1.0058	1.0017	1.0058	1.0017
pdb|1dj0A02	CATH	test	49	1118	1.7862	1.8672	1.0048	1.0463	0.9884	0.9949	0.9769	0.9773	0.9642	0.9609	0.9557	0.9519	0.9476	0.9453	0.9411
pdb|1dj2A02	CATH	train	56	1240	2.6384	2.1154	1.0783	1.0844	1.0253	1.0467	1.0561	1.0733	1.0843	1.091	1.0941	1.0951	1.0952	1.0952	1.0952
pdb|1dj7A00	CATH	train	50	1268	1.623	1.7377	0.9919	1.0404	0.9973	1.0046	0.9999	1.0016	1.0002	1.0014	1	1.0014	1	1.0014	1
pdb|1dj7B00	CATH	train	42	1032	1.4689	1.584	0.9804	1.0274	0.9966	1.0059	0.9985	1.0046	0.998	1.0049	0.998	1.0051	0.9981	1.0051	0.9981
pdb|1dj8A00	CATH	test	47	1102	1.9111	1.7695	1.0089	1.0433	0.9891	0.9963	0.9893	0.9895	0.9892	0.9892	0.9892	0.9892	0.9892	0.9892	0.9892
pdb|1djxA02	CATH	train	118	1558	10.3178	7.2413	2.7133	2.1656	1.4929	1.3321	1.1838	1.1313	1.093	1.08	1.0694	1.0708	1.07	1.0742	1.0779
pdb|1djxA03	CATH	train	70	1444	3.6451	2.6996	1.1537	1.1225	1.0184	1.0197	1.0125	1.0149	1.0146	1.0148	1.0149	1.0149	1.0149	1.0149	1.0149
pdb|1djxB01	CATH	train	31	688	1.2414	1.3397	0.9622	1.0169	0.9824	0.9833	0.9722	0.9662	0.9632	0.9625	0.9624	0.9624	0.9624	0.9624	0.9624
pdb|1dk0A00	CATH	test	63	882	5.1521	4.5631	2.0316	1.8137	1.3437	1.248	1.1227	1.0877	1.0487	1.0354	1.0228	1.0177	1.014	1.0127	1.0119
pdb|1dk5B01	CATH	train	42	822	2.0775	1.7851	1.0391	1.0521	1.0158	1.0247	1.0272	1.0377	1.0433	1.0498	1.0567	1.0594	1.0635	1.0678	1.0713
pdb|1dk8A01	CATH	train	27	520	1.2062	1.2766	0.98	1.0145	1.0082	1.0152	1.0179	1.018	1.018	1.018	1.018	1.018	1.018	1.018	1.018
pdb|1dk8A02	CATH	train	46	644	4.2905	3.0845	1.5694	1.3143	1.1252	1.0681	1.0317	1.0192	1.0098	1.008	1.0044	1.0051	1.004	1.0044	1.0037
pdb|1dkgA01	CATH	test	58	816	4.8197	3.5251	1.5285	1.3247	1.0964	1.0476	1.0045	0.9902	0.9787	0.9737	0.9711	0.9703	0.9696	0.9695	0.9695
pdb|1dkgA02	CATH	train	29	548	1.1319	1.3244	0.9662	1.0132	0.9908	0.9877	0.9804	0.9784	0.9752	0.9744	0.974	0.974	0.974	0.974	0.974
pdb|1dkqA02	CATH	train	61	748	6.4193	4.9151	2.3408	1.8499	1.4098	1.2545	1.1405	1.089	1.0527	1.0341	1.0219	1.0141	1.0091	1.0069	1.005
pdb|1dkuA01	CATH	train	62	938	3.3383	2.7899	1.1907	1.2018	1.02	1.036	1.0015	1.007	0.9952	0.9978	0.9941	0.9961	0.9932	0.9959	0.9932
pdb|1dkuA02	CATH	test	78	1194	4.8279	3.7336	1.3782	1.2986	1.0528	1.046	1.0034	0.9935	0.9785	0.968	0.9615	0.9539	0.9439	0.9354	0.9222
pdb|1dkxA01	CATH	train	61	1226	2.6366	2.6227	1.1498	1.142	1.02	1.0192	1.0072	1.0073	1.0077	1.008	1.0083	1.0085	1.0086	1.0086	1.0086
pdb|1dkxA02	CATH	train	40	822	1.6944	1.6461	1.0139	1.0289	1.0028	1.0072	1.0068	1.0099	1.0117	1.0126	1.0131	1.0132	1.0132	1.0132	1.0132
pdb|1dl5A01	CATH	train	75	1070	5.2646	3.7903	1.5033	1.3844	1.0816	1.0512	0.9887	0.9758	0.955	0.9479	0.9389	0.9367	0.9347	0.9346	0.9346
pdb|1dl5A02	CATH	test	59	1104	3.2917	2.6551	1.1656	1.1405	1.0239	1.0401	1.036	1.0514	1.0576	1.06	1.06	1.06	1.06	1.06	1.06
pdb|1dl6A00	CATH	train	32	672	1.2166	1.3655	0.9566	1.0166	0.9909	0.9957	0.9938	0.9941	0.994	0.994	0.994	0.994	0.994	0.994	0.994
pdb|1dleB02	CATH	train	67	882	5.6097	4.0933	1.7678	1.5218	1.1734	1.1133	1.0353	1.017	0.9947	0.9899	0.9828	0.9806	0.9787	0.9783	0.9777
pdb|1dljA01	CATH	train	95	1236	7.2268	5.4263	1.9813	1.6892	1.2145	1.1363	1.0344	1.0041	0.97	0.9503	0.9279	0.9131	0.8985	0.8859	0.8762
pdb|1dljA02	CATH	test	62	1142	3.0989	2.4388	1.0831	1.1096	0.9995	1.0151	0.9986	1.0109	1.0113	1.0161	1.0204	1.024	1.0238	1.0251	1.0255
pdb|1dljA03	CATH	train	34	740	1.2092	1.4277	0.9558	1.0262	0.9982	1.0131	1.0124	1.0228	1.0265	1.0296	1.0356	1.0428	1.0519	1.0555	1.0579
pdb|1dlwA00	CATH	train	42	790	1.5914	1.7846	0.9527	1.0802	0.9808	1.0012	0.9766	0.9804	0.97	0.9678	0.9615	0.9581	0.9563	0.9539	0.9513
pdb|1dm9A00	CATH	train	55	924	4.0329	2.9224	1.4599	1.2508	1.0968	1.0488	1.0215	1.0102	1.0038	1.0006	0.9986	0.9975	0.997	0.9967	0.9964
pdb|1dmgA00	CATH	test	96	1290	8.4913	6.0743	2.4164	1.9239	1.3808	1.2405	1.1195	1.0746	1.0448	1.0332	1.0248	1.023	1.0192	1.0194	1.0182
pdb|1dmhA00	CATH	train	160	1938	15.0846	11.3561	4.0798	3.0632	1.9289	1.5937	1.3284	1.2173	1.1393	1.0989	1.0735	1.0587	1.0486	1.0444	1.0426
pdb|1dmlA00	CATH	train	107	1948	4.5479	4.1536	1.3321	1.3329	1.0253	1.0259	0.965	0.964	0.9458	0.9437	0.9338	0.9299	0.9216	0.9167	0.9115
pdb|1dmuA00	CATH	train	133	2420	6.5713	5.2547	1.5566	1.5079	1.0901	1.0782	0.9977	0.9933	0.9755	0.9718	0.9687	0.9665	0.9657	0.9657	0.9656
pdb|1dmzA00	CATH	test	75	1736	2.8871	2.715	1.079	1.1219	0.9809	0.9768	0.9399	0.9209	0.8981	0.8857	0.8783	0.8771	0.877	0.877	0.877
pdb|1dn0D02	CATH	train	44	1040	1.4915	1.5596	0.9741	1.0274	0.9924	0.9986	0.9908	0.9959	0.9901	0.9954	0.9898	0.9953	0.9897	0.9952	0.9897
pdb|1dn1B00	CATH	train	111	1468	11.2442	7.8997	3.2346	2.4979	1.7738	1.551	1.367	1.2861	1.2239	1.1872	1.1605	1.1435	1.1273	1.1135	1.1024
pdb|1dnlA00	CATH	train	99	1722	6.2793	4.7147	1.6896	1.3918	1.0913	1.0239	0.9685	0.9482	0.9402	0.9392	0.9392	0.9392	0.9392	0.9392	0.9392
pdb|1dnpA01	CATH	test	57	1290	2.1268	1.9305	1.0128	1.0595	1.0045	1.0279	1.0274	1.0443	1.0539	1.0619	1.0716	1.0773	1.0839	1.0885	1.0904
pdb|1dnyA00	CATH	train	36	882	0.9829	1.3422	0.9463	1.0428	1.0076	1.0377	1.0297	1.0448	1.043	1.049	1.0492	1.0492	1.0492	1.0492	1.0492
pdb|1dofA02	CATH	train	46	960	2.8432	2.0462	1.1569	1.0704	1.0014	0.9842	0.9643	0.9511	0.9424	0.9365	0.9324	0.9321	0.932	0.932	0.932
pdb|1dofA03	CATH	train	28	592	1.0376	1.2392	0.9684	1.0226	1.0106	1.0268	1.0318	1.0362	1.038	1.0384	1.0384	1.0384	1.0384	1.0384	1.0384
pdb|1doiA00	CATH	test	63	828	6.9631	4.9917	2.4294	1.8428	1.4295	1.2586	1.1507	1.0946	1.0604	1.0392	1.0268	1.0179	1.0142	1.0094	1.0077
pdb|1dosA00	CATH	train	158	1488	14.2934	11.3708	4.3661	3.775	2.4108	2.1157	1.6957	1.54	1.3731	1.292	1.2124	1.1635	1.1221	1.0937	1.0697
pdb|1dowA00	CATH	train	102	1518	6.3042	4.714	1.6221	1.3825	1.0835	1.0346	0.9803	0.9645	0.9582	0.9576	0.9576	0.9576	0.9576	0.9576	0.9576
pdb|1dp3A00	CATH	train	37	716	2.0473	1.7258	1.0521	1.045	0.995	0.9915	0.976	0.9665	0.9614	0.9596	0.9592	0.9589	0.9588	0.9588	0.9588
pdb|1dp4C02	CATH	test	89	1064	8.2493	5.4578	2.2569	1.7108	1.2993	1.1741	1.0912	1.057	1.0351	1.0299	1.0233	1.0231	1.0211	1.0232	1.0227
pdb|1dp5B00	CATH	train	17	218	1.026	1.1717	0.9733	1.0101	0.9963	1.0012	0.9994	1.0017	1.0002	1.0021	1.0003	1.0021	1.0003	1.0021	1.0003
pdb|1dp7P00	CATH	train	39	336	4.4957	3.8013	2.0012	1.7404	1.4299	1.3133	1.2164	1.161	1.1199	1.0927	1.0714	1.0575	1.0456	1.0375	1.0326
pdb|1dpbA00	CATH	train	97	706	7.2385	5.9266	2.0085	2.1815	1.3515	1.4047	1.1478	1.151	1.0584	1.0522	1.0132	1.0035	0.9845	0.9765	0.9645
pdb|1dpeA01	CATH	test	80	922	6.0427	5.139	1.8726	1.6148	1.2073	1.1388	1.066	1.052	1.0424	1.0441	1.0482	1.0541	1.06	1.0669	1.0736
pdb|1dpeA02	CATH	train	59	854	3.6114	3.2771	1.3183	1.2225	1.0517	1.0366	1.0187	1.0202	1.0214	1.0252	1.0296	1.0341	1.0412	1.0443	1.0489
pdb|1dpeA03	CATH	train	98	1206	7.0281	5.34	1.9073	1.6908	1.1984	1.14	1.0278	1.0063	0.9674	0.959	0.9444	0.9414	0.9394	0.9392	0.9392
pdb|1dpgA01	CATH	train	85	1374	4.514	3.8837	1.3752	1.2815	1.0592	1.0483	1.0261	1.0311	1.0305	1.0354	1.0401	1.0452	1.0492	1.0539	1.0562
pdb|1dpgA02	CATH	test	154	1986	12.3327	9.1696	3.0649	2.5247	1.5722	1.4449	1.2137	1.1859	1.1261	1.1253	1.1126	1.122	1.1255	1.1383	1.1531
pdb|1dpjA02	CATH	train	71	1502	2.9902	2.9255	1.1326	1.1357	1.0185	1.0311	1.0279	1.0313	1.0362	1.042	1.0446	1.0492	1.0522	1.0535	1.0542
pdb|1dptA00	CATH	train	44	854	1.4371	1.6674	0.9202	1.0586	0.9802	1.0123	0.997	1.0077	1.0024	1.0066	1.0062	1.0069	1.007	1.0071	1.0071
pdb|1dpuA00	CATH	train	28	408	1.5295	1.6121	1.0162	1.0383	0.9989	1.0021	0.9971	0.9971	0.9917	0.9935	0.9858	0.9848	0.9787	0.9757	0.9721
pdb|1dq3A01	CATH	test	96	786	12.3075	9.9156	4.6546	3.6239	2.5654	2.1348	1.7885	1.5899	1.4434	1.3441	1.2691	1.2145	1.1718	1.1434	1.1193
pdb|1dq3A02	CATH	train	37	518	2.2937	2.0836	1.0734	1.1164	1.0011	1.0156	0.9955	1.0016	0.9963	0.9981	0.9971	0.9979	0.9973	0.998	0.9973
pdb|1dq3A03	CATH	train	52	668	4.5215	3.3635	1.581	1.3313	1.13	1.0731	1.0388	1.0257	1.0187	1.0163	1.016	1.0166	1.0191	1.0193	1.0226
pdb|1dq3A04	CATH	train	58	842	3.9766	3.1641	1.3987	1.2537	1.0648	1.0361	0.9981	0.985	0.9702	0.9584	0.9489	0.9403	0.9348	0.9305	0.9287
pdb|1dqaD01	CATH	test	29	508	1.3488	1.4199	0.9769	1.019	0.9902	0.9895	0.9824	0.9817	0.9816	0.9816	0.9816	0.9816	0.9816	0.9816	0.9816
pdb|1dqcA00	CATH	train	35	574	2.3223	2.124	1.1951	1.1363	1.041	1.0321	1.0212	1.024	1.0261	1.0315	1.0353	1.0373	1.0385	1.0386	1.0386
pdb|1dqeA00	CATH	train	65	798	6.6969	5.0162	2.3405	1.7974	1.3888	1.2311	1.138	1.089	1.0617	1.047	1.0375	1.0314	1.0279	1.0259	1.0248
pdb|1dqgA00	CATH	train	67	1002	4.7868	4.093	1.6847	1.4345	1.1574	1.094	1.0509	1.0375	1.0299	1.0272	1.0261	1.0257	1.0256	1.0256	1.0256
pdb|1dqiA00	CATH	test	65	1162	3.3537	2.9781	1.2355	1.1838	1.0382	1.0344	1.0239	1.0342	1.0437	1.0537	1.0652	1.0805	1.0912	1.0972	1.0997
pdb|1dqnA00	CATH	train	106	1570	7.8397	5.5949	1.9417	1.5936	1.1704	1.0983	1.0296	1.0149	1.0037	1.001	1.0006	1.0006	1.0006	1.0006	1.0006
pdb|1dqtA00	CATH	train	57	1226	2.2117	2.3376	1.0359	1.0975	0.9836	0.9753	0.9518	0.9447	0.939	0.9337	0.929	0.9248	0.9209	0.9161	0.9132
pdb|1dqzA00	CATH	train	98	1574	6.3274	5.1695	1.8736	1.6933	1.218	1.1468	1.0334	0.9969	0.9545	0.9322	0.9135	0.9005	0.8917	0.8836	0.878
pdb|1dr9A01	CATH	test	52	1284	1.7331	1.826	1.0022	1.0284	0.9811	0.976	0.9645	0.958	0.9552	0.955	0.9547	0.9547	0.9547	0.9547	0.9547
pdb|1dr9A02	CATH	train	47	1164	1.6061	1.7442	0.9912	1.0452	1.0139	1.0366	1.0358	1.0419	1.0423	1.0424	1.0424	1.0424	1.0424	1.0424	1.0424
pdb|1ds1A00	CATH	train	143	1718	11.4738	7.8513	3.0033	2.48	1.6357	1.459	1.2161	1.1384	1.0513	1.0158	0.9804	0.9572	0.9368	0.9197	0.904
pdb|1ds6B00	CATH	train	92	1696	6.2347	4.3649	1.6458	1.3632	1.0957	1.0327	0.9848	0.9591	0.9339	0.9137	0.8913	0.8718	0.8548	0.8493	0.847
pdb|1ds9A00	CATH	test	85	1846	3.5906	2.8958	1.1434	1.1597	1.0228	1.0487	1.0383	1.0608	1.0703	1.092	1.1174	1.1394	1.1645	1.1841	1.1977
pdb|1dszA00	CATH	train	41	1042	1.3305	1.5263	0.9422	1.0364	0.9717	0.9773	0.9596	0.9563	0.9457	0.9438	0.9416	0.9406	0.9404	0.9404	0.9404
pdb|1dt9A01	CATH	train	44	1082	1.6592	1.6215	1.0114	1.0337	0.9907	0.9961	0.9864	0.9879	0.9822	0.9861	0.9806	0.9854	0.9802	0.985	0.9798
pdb|1dt9A02	CATH	train	48	1162	2.216	1.8302	1.043	1.0448	0.9953	0.9931	0.9871	0.9861	0.9844	0.9831	0.9818	0.9811	0.9799	0.9788	0.9779
pdb|1dt9A03	CATH	test	83	1446	7.2794	4.5406	1.871	1.4506	1.1625	1.0915	1.049	1.0358	1.0297	1.027	1.0257	1.0254	1.0253	1.0252	1.0252
pdb|1dtdB00	CATH	train	23	384	0.9618	1.222	0.962	1.0123	0.9918	0.9934	0.9871	0.985	0.9796	0.9773	0.9739	0.9723	0.9678	0.9654	0.9612
pdb|1dtjA00	CATH	train	36	464	2.5671	2.0537	1.1295	1.1008	1.0159	1.0133	0.9992	0.9988	0.9947	0.9949	0.9933	0.9931	0.9922	0.9916	0.9912
pdb|1dtlA02	CATH	train	38	562	2.9003	2.247	1.1973	1.104	1.0263	1.0157	1.0078	1.0075	1.007	1.0078	1.007	1.0077	1.007	1.0077	1.007
pdb|1dtxA00	CATH	test	25	426	1.1429	1.3558	0.9741	1.0192	0.9965	1.0026	1.0015	1.0015	1.0012	1.0015	1.0011	1.0014	1.0011	1.0014	1.0011
pdb|1du2A00	CATH	train	37	498	2.0876	1.9631	1.0165	1.158	0.98	1.0295	0.98	0.992	0.9721	0.9728	0.9617	0.9607	0.9551	0.9545	0.9496
pdb|1du3A02	CATH	train	19	282	1	1.1764	0.9838	1.008	1.0001	1.0018	1.0012	1.0015	1.0018	1.0018	1.0018	1.0018	1.0018	1.0018	1.0018
pdb|1dugA02	CATH	train	61	524	7.6463	5.6347	2.7291	2.0897	1.5904	1.3825	1.2445	1.1672	1.1142	1.0816	1.0609	1.0443	1.0339	1.0257	1.0193
pdb|1dulA00	CATH	test	29	376	2.1851	1.8726	1.1179	1.0711	1.0114	1.0082	1.0001	1.0028	0.9984	1.0015	0.9979	1.0015	0.9979	1.0015	0.9979
pdb|1dusA00	CATH	train	100	788	12.5323	9.6794	4.452	3.3107	2.3245	1.8812	1.5724	1.3906	1.2676	1.1856	1.1292	1.0922	1.0645	1.0454	1.0332
pdb|1duvG01	CATH	train	67	806	5.1642	4.5384	1.818	1.541	1.1926	1.1092	1.0432	1.0161	0.996	0.988	0.9848	0.9837	0.9836	0.9836	0.9836
pdb|1duxC00	CATH	train	44	662	2.8569	2.4828	1.2131	1.1365	1.0303	1.0231	1.0175	1.0194	1.0194	1.0194	1.0194	1.0194	1.0194	1.0194	1.0194
pdb|1dv0A00	CATH	test	27	450	1.3327	1.3768	0.9929	1.0178	1.0022	1.0095	1.0112	1.012	1.0121	1.0121	1.0121	1.0121	1.0121	1.0121	1.0121
pdb|1dv1B01	CATH	train	35	522	2.0758	1.8988	1.1091	1.092	1.0162	1.0211	1.0085	1.0176	1.0168	1.0182	1.0182	1.0182	1.0182	1.0182	1.0182
pdb|1dv5A00	CATH	train	44	622	3.5426	2.6653	1.3091	1.1908	1.052	1.0292	1.0113	1.0056	1.0038	1.0027	1.0023	1.0028	1.0024	1.0027	1.0023
pdb|1dvhA00	CATH	train	37	656	1.8706	1.8177	1.0662	1.0481	0.9989	0.9896	0.9845	0.984	0.984	0.984	0.984	0.984	0.984	0.984	0.984
pdb|1dvjA00	CATH	test	112	1122	10.6416	6.8438	2.6761	1.9677	1.3912	1.2223	1.0902	1.0394	0.9911	0.9714	0.9578	0.9527	0.951	0.9502	0.9499
pdb|1dvkA00	CATH	train	76	1118	4.3544	3.4529	1.3124	1.2709	1.0591	1.0539	1.0248	1.0275	1.0258	1.0302	1.0331	1.0366	1.0387	1.0419	1.0439
pdb|1dvoA00	CATH	train	74	1316	3.7039	3.0207	1.2081	1.1721	1.0366	1.043	1.0356	1.0481	1.0517	1.0625	1.0685	1.0778	1.0829	1.0909	1.0972
pdb|1dw0A00	CATH	train	46	914	1.4667	1.7668	0.9365	1.0649	0.972	1.0026	0.975	0.9864	0.9724	0.9765	0.9693	0.9703	0.9672	0.9669	0.9659
pdb|1dw9A01	CATH	test	36	768	1.1781	1.4345	0.949	1.0228	0.9791	0.9849	0.9661	0.9634	0.9518	0.9474	0.938	0.9324	0.9297	0.9288	0.9288
pdb|1dw9A02	CATH	train	42	842	2.4814	1.917	1.1089	1.0558	1.0029	0.9885	0.9729	0.962	0.951	0.9477	0.9474	0.9474	0.9474	0.9474	0.9474
pdb|1dx5I01	CATH	train	18	260	0.9495	1.1175	0.9902	1.001	0.9974	0.9967	0.9939	0.9936	0.9925	0.9913	0.9905	0.99	0.9897	0.9899	0.99
pdb|1dx5I02	CATH	train	16	208	1.0197	1.162	0.9862	1.0099	1.0023	1.0052	1.0052	1.0054	1.0054	1.0054	1.0054	1.0054	1.0054	1.0054	1.0054
pdb|1dx5I03	CATH	test	19	236	1.5069	1.4112	1.0613	1.0323	1.0058	1.0002	0.9978	0.9974	0.9972	0.9972	0.9972	0.9972	0.9972	0.9972	0.9972
pdb|1dxeA00	CATH	train	105	664	9.9382	8.0352	3.4601	3.2489	2.1514	2.0363	1.6412	1.5574	1.3868	1.3281	1.243	1.1999	1.1501	1.1184	1.0859
pdb|1dxjA01	CATH	train	72	716	6.0617	5.1127	1.9945	1.756	1.2675	1.1946	1.0813	1.0562	1.0261	1.015	1.0045	0.9979	0.9932	0.9884	0.9854
pdb|1dxsA00	CATH	train	34	438	2.7207	2.3073	1.2089	1.1381	1.0311	1.0194	1.0031	0.9973	0.9885	0.9842	0.9805	0.9775	0.9771	0.9749	0.974
pdb|1dxyA01	CATH	test	68	678	7.1988	5.9589	2.6812	2.2495	1.6817	1.4994	1.3336	1.2489	1.1856	1.1448	1.1155	1.0956	1.0808	1.0717	1.0633
pdb|1dxyA02	CATH	train	89	1020	6.1419	4.8156	1.7013	1.5021	1.139	1.0997	1.0382	1.0376	1.0259	1.0341	1.0342	1.0409	1.0441	1.0497	1.0567
pdb|1dy5A00	CATH	train	55	878	2.7691	2.7593	1.1318	1.2076	1.0119	1.0462	1.014	1.0295	1.0232	1.0294	1.0278	1.0295	1.0296	1.0296	1.0296
pdb|1dy9A01	CATH	train	41	742	1.9892	2.045	1.0636	1.0756	1.0117	1.0204	1.0206	1.0298	1.0369	1.0451	1.0519	1.0542	1.0559	1.0571	1.0572
pdb|1dynA00	CATH	test	69	948	6.4384	4.7786	2.2171	1.7595	1.3688	1.2199	1.1088	1.051	1.0094	0.9852	0.9704	0.9605	0.9552	0.9517	0.95
pdb|1dyoA00	CATH	train	80	1210	5.6602	4.6604	1.8126	1.5336	1.1854	1.1021	1.0377	1.013	0.9972	0.9897	0.9857	0.9834	0.9832	0.9831	0.9831
pdb|1dypA00	CATH	train	145	1800	13.5834	10.7169	3.9847	3.1021	1.9517	1.6328	1.3262	1.1922	1.0806	1.0202	0.9804	0.9494	0.9312	0.9202	0.9133
pdb|1dyqA01	CATH	train	50	1030	2.5092	2.1745	1.0925	1.0649	0.998	0.9905	0.9872	0.987	0.987	0.987	0.987	0.987	0.987	0.987	0.987
pdb|1dysA00	CATH	test	140	1604	13.5398	10.5473	4.1469	3.2639	2.0904	1.7565	1.4307	1.2955	1.1855	1.1284	1.088	1.0648	1.0463	1.0346	1.0258
pdb|1dz3A00	CATH	train	53	1176	2.0674	1.9224	1.039	1.0458	1.0029	1.0129	1.007	1.0133	1.0129	1.0141	1.0139	1.0142	1.0141	1.0141	1.0141
pdb|1dzfA01	CATH	train	79	1428	5.5592	4.029	1.729	1.4207	1.1605	1.0864	1.0364	1.0111	0.9975	0.9873	0.9856	0.9802	0.9811	0.978	0.9802
pdb|1dzfA02	CATH	train	41	1004	1.4883	1.5347	0.995	1.0161	0.9962	0.9973	0.9953	0.9949	0.9952	0.9948	0.9951	0.9948	0.9951	0.9948	0.9951
pdb|1dzkA00	CATH	test	70	1192	5.6445	3.9192	1.7734	1.4482	1.1676	1.0956	1.0424	1.0283	1.0177	1.0177	1.0144	1.0165	1.0153	1.0175	1.0175
pdb|1dzlA00	CATH	train	178	1938	15.8495	12.4016	4.988	4.0174	2.5343	2.1648	1.6981	1.5367	1.3566	1.287	1.2049	1.169	1.1288	1.1118	1.0914
pdb|1e0aB00	CATH	train	25	442	1.1948	1.2477	0.9853	1.0101	1.0007	1.0034	1.0026	1.003	1.0029	1.003	1.003	1.003	1.003	1.003	1.003
pdb|1e0bA00	CATH	train	44	568	4.7515	3.674	1.9506	1.5705	1.2853	1.1652	1.0901	1.0492	1.0252	1.0111	1.0022	0.9973	0.9939	0.992	0.9909
pdb|1e0cA01	CATH	test	53	706	2.7431	2.4806	1.0408	1.2041	0.9903	1.047	0.9972	1.0177	1.003	1.0109	1.0063	1.0099	1.0089	1.0103	1.0092
pdb|1e0gA00	CATH	train	28	504	1.4123	1.3825	0.9989	1.0144	0.9906	0.9881	0.9789	0.9739	0.9713	0.97	0.97	0.97	0.97	0.97	0.97
pdb|1e0tA01	CATH	train	53	670	3.9689	2.9128	1.3586	1.2271	1.0617	1.0451	1.0235	1.0242	1.0238	1.0332	1.0399	1.0472	1.0503	1.054	1.0551
pdb|1e0tA03	CATH	train	46	722	2.4748	2.3492	1.0966	1.1517	1.0098	1.0223	0.9994	1.0021	0.9984	0.9985	0.9978	0.998	0.9979	0.998	0.9979
pdb|1e19A00	CATH	test	129	1260	12.1636	8.6448	3.3815	2.55	1.7487	1.4845	1.2843	1.1949	1.1305	1.0996	1.0772	1.0676	1.0605	1.0579	1.0571
pdb|1e1hA00	CATH	train	111	1566	7.2891	6.259	1.987	1.76	1.2144	1.1399	1.0251	0.9869	0.9553	0.9432	0.9341	0.932	0.931	0.931	0.931
pdb|1e1oA01	CATH	train	85	1530	4.9142	3.9726	1.4304	1.2625	1.0487	1.0087	0.9766	0.9603	0.9548	0.9538	0.9538	0.9538	0.9538	0.9538	0.9538
pdb|1e1oA02	CATH	train	173	2222	13.9413	9.5911	3.1797	2.6202	1.5582	1.4318	1.1377	1.0922	0.9911	0.9665	0.9272	0.916	0.8996	0.891	0.8826
pdb|1e25A00	CATH	test	113	2184	4.4841	3.9564	1.2438	1.3024	1.0126	1.041	0.9821	0.9964	0.976	0.9809	0.974	0.9739	0.9723	0.9723	0.9715
pdb|1e29A00	CATH	train	65	1524	2.3937	2.4283	1.046	1.1215	1.0184	1.0366	1.0291	1.034	1.0345	1.0358	1.0378	1.04	1.042	1.0426	1.0428
pdb|1e2kA00	CATH	train	110	1868	5.4852	4.1432	1.4032	1.4677	1.0616	1.0959	0.9953	1.0056	0.976	0.9783	0.9663	0.9671	0.9635	0.9644	0.9634
pdb|1e2wA01	CATH	train	83	1898	2.7877	2.4986	1.0034	1.1259	0.9804	1.0154	0.9921	1.0062	1.0046	1.0107	1.022	1.03	1.0407	1.0549	1.0681
pdb|1e2wA02	CATH	test	28	560	1.081	1.2316	0.9756	1.0095	0.9946	0.9968	0.9967	0.9969	0.9969	0.9969	0.9969	0.9969	0.9969	0.9969	0.9969
pdb|1e32A01	CATH	train	43	662	3.3512	2.5439	1.3557	1.1958	1.0747	1.0413	1.0226	1.0148	1.0106	1.0087	1.0078	1.0073	1.007	1.0068	1.0068
pdb|1e32A03	CATH	train	39	684	2.0028	1.7829	1.0551	1.0579	1.0115	1.0202	1.0209	1.0319	1.0368	1.044	1.0459	1.0494	1.0502	1.0506	1.0506
pdb|1e32A04	CATH	train	49	802	3.4496	2.4337	1.2139	1.114	1.0141	0.9989	0.9845	0.9786	0.972	0.9704	0.966	0.9642	0.9636	0.9633	0.9633
pdb|1e3oC01	CATH	test	39	794	1.7474	1.711	1.0398	1.0296	0.9899	0.9802	0.9736	0.9728	0.9726	0.9726	0.9726	0.9726	0.9726	0.9726	0.9726
pdb|1e3oC02	CATH	train	24	452	1.0671	1.1699	0.9846	1.0017	0.9934	0.9933	0.993	0.993	0.993	0.993	0.993	0.993	0.993	0.993	0.993
pdb|1e3pA02	CATH	train	49	592	4.3659	3.2368	1.6359	1.4708	1.2029	1.1477	1.0685	1.0423	1.0096	0.9986	0.9851	0.9796	0.9737	0.9707	0.9685
pdb|1e4cP00	CATH	train	100	988	9.2535	6.828	2.6133	2.0803	1.4421	1.2846	1.1465	1.0986	1.0652	1.0493	1.0425	1.0403	1.0403	1.0431	1.0442
pdb|1e4eA03	CATH	test	57	888	3.2905	2.9038	1.2647	1.219	1.0505	1.0478	1.0258	1.0287	1.0269	1.028	1.028	1.028	1.028	1.028	1.028
pdb|1e4fT01	CATH	train	40	740	1.9395	1.8465	1.0671	1.0508	1.0011	0.9981	0.9875	0.986	0.9844	0.9842	0.9842	0.9842	0.9842	0.9842	0.9842
pdb|1e4fT02	CATH	train	30	562	1.3783	1.4123	1.0072	1.0162	0.9986	0.9998	0.9976	0.9976	0.997	0.9967	0.9965	0.9967	0.9965	0.9967	0.9965
pdb|1e4fT03	CATH	train	65	788	6.0623	4.1505	1.8865	1.521	1.2215	1.1404	1.0826	1.0689	1.0593	1.0583	1.0598	1.0655	1.0687	1.0705	1.0716
pdb|1e4fT04	CATH	test	47	766	2.7405	2.2297	1.1453	1.0982	1.0187	1.0185	1.0132	1.0173	1.0186	1.0235	1.0253	1.0277	1.0284	1.0293	1.0299
pdb|1e4uA00	CATH	train	36	712	1.711	1.6498	1.0288	1.041	1.0087	1.0216	1.0223	1.0264	1.0266	1.0266	1.0266	1.0266	1.0266	1.0266	1.0266
pdb|1e50B00	CATH	train	69	950	6.1452	4.1101	1.816	1.4223	1.1677	1.0916	1.0535	1.0372	1.0301	1.0269	1.026	1.0256	1.0256	1.0256	1.0256
pdb|1e52A00	CATH	train	35	758	1.3265	1.4292	0.9887	1.0173	0.9876	0.981	0.9683	0.9613	0.9506	0.946	0.9411	0.9405	0.94	0.94	0.9398
pdb|1e57B00	CATH	test	75	988	5.4179	3.9309	1.6191	1.523	1.1595	1.1404	1.0539	1.0497	1.0239	1.0216	1.0111	1.0094	1.0056	1.0054	1.0018
pdb|1e59A00	CATH	train	110	1436	8.6316	6.2129	2.3308	1.8559	1.3475	1.2154	1.1088	1.0682	1.04	1.0269	1.0188	1.0143	1.0115	1.0098	1.0087
pdb|1e5dA01	CATH	train	63	1216	2.7895	2.3908	1.0765	1.1003	1.015	1.0325	1.0274	1.0402	1.042	1.0504	1.0538	1.0593	1.0617	1.0641	1.0671
pdb|1e5dA02	CATH	train	118	1656	9.9666	6.6074	2.5674	1.9541	1.4183	1.276	1.1723	1.1431	1.1237	1.1214	1.1186	1.1178	1.1161	1.115	1.1138
pdb|1e5kA00	CATH	test	87	1672	4.2704	3.3082	1.3282	1.2432	1.0665	1.0722	1.0531	1.0774	1.0867	1.1074	1.1213	1.1372	1.1464	1.1554	1.1577
pdb|1e5pA00	CATH	train	68	1584	2.6732	2.5543	1.0969	1.1145	0.9983	0.9949	0.9714	0.9643	0.941	0.93	0.9032	0.8861	0.8621	0.8515	0.837
pdb|1e5rB01	CATH	train	89	1848	4.3921	3.1903	1.2537	1.2074	1.0346	1.0458	1.027	1.0431	1.049	1.0653	1.0803	1.1017	1.1183	1.1365	1.1538
pdb|1e5rB02	CATH	train	41	1022	1.3155	1.4458	0.9846	1.0059	0.9774	0.9765	0.9699	0.9696	0.9696	0.9696	0.9696	0.9696	0.9696	0.9696	0.9696
pdb|1e5wA04	CATH	test	37	940	1.3966	1.3984	0.9925	1.0118	0.9989	0.997	0.9987	0.9958	0.9961	0.9946	0.9952	0.9937	0.9951	0.9937	0.9951
pdb|1e69A00	CATH	train	148	1586	15.0793	10.5277	4.3667	3.2455	2.1384	1.7761	1.4553	1.3206	1.2095	1.1526	1.1103	1.0863	1.0672	1.0582	1.05
pdb|1e6cA00	CATH	train	61	1190	2.6655	2.2258	1.0953	1.1171	1.0267	1.0517	1.0384	1.0602	1.0582	1.0664	1.0678	1.0678	1.0678	1.0678	1.0678
pdb|1e6iA00	CATH	train	53	1202	1.9237	1.7887	0.9866	1.059	1.0029	1.0286	1.0222	1.0395	1.0397	1.0492	1.0514	1.0599	1.0628	1.068	1.0715
pdb|1e6uA01	CATH	test	99	1556	7.6741	4.6914	1.7302	1.4081	1.1232	1.0901	1.0571	1.0755	1.0777	1.0888	1.0915	1.0934	1.094	1.0946	1.0946
pdb|1e6uA02	CATH	train	47	1234	1.5452	1.6119	1.0028	1.0139	0.9729	0.9609	0.9497	0.9401	0.9361	0.9329	0.93	0.929	0.9268	0.9264	0.9259
pdb|1e7lA02	CATH	train	34	888	1.1977	1.2475	0.9855	1.0138	1.012	1.0207	1.025	1.025	1.025	1.025	1.025	1.025	1.025	1.025	1.025
pdb|1e7uA04	CATH	train	76	1136	7.0398	4.822	2.2884	1.8611	1.4942	1.3543	1.247	1.1859	1.1404	1.1089	1.0858	1.0683	1.0548	1.0447	1.0363
pdb|1e7wB00	CATH	test	113	1570	8.2779	5.7465	2.0775	1.6363	1.2087	1.1002	1.0172	0.9771	0.946	0.9275	0.9075	0.8956	0.8844	0.8766	0.8703
pdb|1e85A00	CATH	train	54	1174	2.0214	1.8442	0.9953	1.0722	1.0126	1.0412	1.0388	1.053	1.055	1.0653	1.067	1.0736	1.0755	1.0773	1.0787
pdb|1e87A00	CATH	train	58	1314	2.5993	2.2136	1.1039	1.0939	1.0192	1.0249	1.0209	1.0259	1.0269	1.0285	1.0291	1.03	1.0294	1.03	1.0294
pdb|1e8cA01	CATH	train	47	1192	1.2518	1.506	0.9217	1.0512	0.9779	1.0185	0.9957	1.0111	1.0016	1.0096	1.0059	1.0096	1.006	1.0095	1.0059
pdb|1e8cA02	CATH	test	98	1540	8.0421	5.5882	2.3695	1.8525	1.4057	1.2652	1.1672	1.1334	1.1153	1.1154	1.1189	1.127	1.1381	1.1461	1.1506
pdb|1e8cB03	CATH	train	66	1492	2.9823	2.2405	1.0926	1.0569	0.9772	0.9576	0.9338	0.9225	0.9036	0.893	0.8835	0.8808	0.8792	0.8779	0.8768
pdb|1e8gA01	CATH	train	59	1514	1.9169	1.8303	1.0034	1.0234	0.9592	0.9448	0.9191	0.9063	0.8892	0.8782	0.8644	0.858	0.8568	0.8568	0.8568
pdb|1e8gA03	CATH	train	97	1818	6.1159	3.9225	1.5766	1.3357	1.0586	1.0196	0.9586	0.9458	0.9239	0.9185	0.9092	0.9064	0.9007	0.8921	0.8736
pdb|1e8gA04	CATH	test	24	470	1.0294	1.1763	0.9901	1.0044	1.001	1.0042	1.0036	1.0063	1.0057	1.0073	1.0069	1.0077	1.0076	1.0079	1.0079
pdb|1e8oA00	CATH	train	49	612	5.1831	3.6201	1.8506	1.4773	1.2296	1.1312	1.0734	1.0422	1.0257	1.0154	1.0098	1.0058	1.0041	1.0025	1.0015
pdb|1e8pA00	CATH	train	13	138	0.6154	1.2157	0.9108	1.0392	0.9848	1.0093	0.997	1.0003	0.9948	0.9957	0.9936	0.9932	0.9925	0.9917	0.9916
pdb|1e8rA00	CATH	train	12	120	0.8307	1.1003	0.9852	1.0049	0.9991	0.9999	0.9985	0.9979	0.9965	0.9967	0.9954	0.9954	0.9951	0.9951	0.9951
pdb|1e8uA00	CATH	test	179	880	22.0249	21.9483	10.3471	9.7584	6.876	6.3162	5.2125	4.7921	4.2476	3.9432	3.6222	3.4007	3.1908	3.0272	2.8761
pdb|1e8yA01	CATH	train	66	458	6.1705	5.1193	2.1636	1.9703	1.3934	1.3217	1.1533	1.1238	1.0644	1.055	1.0336	1.0299	1.0207	1.022	1.019
pdb|1e8yA02	CATH	train	86	772	7.3785	6.0345	2.3129	2.025	1.4226	1.3158	1.167	1.1275	1.0845	1.0728	1.0618	1.0608	1.0602	1.0618	1.0616
pdb|1e8yA03	CATH	train	91	1084	5.582	5.0058	1.6624	1.6489	1.1482	1.1584	1.0378	1.039	0.9959	0.9889	0.9689	0.9587	0.9446	0.9343	0.9232
pdb|1e8yA05	CATH	test	86	1298	3.9847	4.1117	1.3949	1.4307	1.0963	1.0851	1.0056	0.9871	0.9537	0.9381	0.9191	0.9074	0.8969	0.89	0.8876
pdb|1e91A00	CATH	train	47	632	3.1093	2.9203	1.2218	1.2113	1.0282	1.0286	0.9959	0.9912	0.983	0.9811	0.9809	0.9809	0.9809	0.9809	0.9809
pdb|1e94E02	CATH	train	54	806	3.5909	3.0334	1.2848	1.2216	1.0343	1.0235	0.9887	0.9863	0.9795	0.9783	0.9761	0.975	0.9742	0.9741	0.9741
pdb|1e9gB00	CATH	train	139	1380	13.4166	10.0801	3.7949	3.0847	1.9251	1.6858	1.3581	1.2571	1.1466	1.1002	1.0553	1.0376	1.0169	1.0034	0.9953
pdb|1e9rA02	CATH	test	51	948	2.092	2.2368	1.0426	1.0897	1.0077	1.0283	1.0211	1.0387	1.0402	1.0498	1.0504	1.0504	1.0504	1.0504	1.0504
pdb|1e9rD01	CATH	train	137	1488	13.8454	10.4093	4.1894	3.1912	2.1224	1.77	1.4804	1.3473	1.2503	1.2014	1.1693	1.154	1.1462	1.1439	1.1422
pdb|1e9yA01	CATH	train	68	1248	4.048	3.3121	1.4001	1.3036	1.1035	1.059	1.023	1.0057	0.9946	0.9878	0.9844	0.9825	0.9813	0.9806	0.9801
pdb|1ea5A00	CATH	train	218	2182	21.2622	16.3613	6.3266	4.8389	2.9992	2.4211	1.8669	1.6177	1.4139	1.2998	1.2111	1.16	1.121	1.0965	1.0767
pdb|1eaiC00	CATH	test	24	306	1.6743	1.684	1.0399	1.0586	0.9985	1.0039	0.9947	0.9966	0.9924	0.9932	0.9908	0.9909	0.9905	0.9905	0.9904
pdb|1eajB00	CATH	train	62	542	7.1003	5.8466	2.7036	2.2039	1.6384	1.4415	1.2806	1.1962	1.1371	1.102	1.076	1.0592	1.0468	1.0384	1.0328
pdb|1eakA01	CATH	train	34	452	2.401	2.172	1.1668	1.1101	1.0248	1.0161	1.0097	1.0091	1.009	1.009	1.009	1.009	1.009	1.009	1.009
pdb|1eaqB00	CATH	train	76	734	8.5109	6.6048	3.0765	2.4367	1.789	1.5457	1.3499	1.2475	1.1715	1.1298	1.0977	1.0777	1.0636	1.0541	1.0471
pdb|1earA01	CATH	test	37	570	2.0767	1.8942	1.068	1.058	1.0026	1.0038	0.9966	0.9973	0.9957	0.9943	0.9949	0.9937	0.9947	0.9935	0.9947
pdb|1earA02	CATH	train	42	666	2.777	2.3171	1.2035	1.109	1.025	1.0049	0.9945	0.9893	0.9882	0.9857	0.9847	0.9836	0.9835	0.9833	0.9832
pdb|1eaxA01	CATH	train	53	826	3.2456	2.7509	1.2308	1.181	1.0399	1.0421	1.0301	1.0401	1.0462	1.0579	1.0648	1.0717	1.0762	1.0797	1.08
pdb|1eaxA02	CATH	train	48	890	2.1224	2.0403	1.0673	1.0598	1.0103	1.0097	1.013	1.0159	1.0198	1.0264	1.0302	1.0372	1.0424	1.0479	1.0533
pdb|1eayD00	CATH	test	38	796	1.4971	1.5579	1.0058	1.0256	0.9996	1.0042	1.0033	1.0081	1.0149	1.0212	1.0256	1.0321	1.038	1.0433	1.0468
pdb|1eazA00	CATH	train	68	1004	6.0123	4.2296	1.9018	1.5054	1.2006	1.1001	1.0367	1.0108	0.9956	0.9881	0.9848	0.9835	0.9825	0.982	0.982
pdb|1eb6A00	CATH	train	76	1234	4.5438	3.8512	1.4606	1.393	1.1044	1.0919	1.043	1.0405	1.0324	1.0347	1.0335	1.0379	1.0383	1.0408	1.042
pdb|1ebdA03	CATH	train	46	986	1.4476	1.6258	0.9245	1.0599	0.9692	1.0168	0.9871	1.0084	0.9906	1.0051	0.9906	1.0051	0.9907	1.0051	0.9907
pdb|1ebfA01	CATH	test	63	1132	2.7785	2.3634	1.0148	1.1675	0.9798	1.0561	1.0057	1.0507	1.032	1.0656	1.0593	1.079	1.0763	1.0887	1.0882
pdb|1ebfA02	CATH	train	95	1460	7.9487	5.0876	1.9624	1.5133	1.1851	1.1068	1.0604	1.0484	1.0425	1.0429	1.044	1.0463	1.0478	1.0514	1.0527
pdb|1ec7A02	CATH	train	120	1908	7.3912	5.2746	1.7902	1.5261	1.1435	1.0898	1.0174	0.9929	0.9668	0.9533	0.938	0.9278	0.9174	0.9089	0.9023
pdb|1ec7C01	CATH	train	73	1632	2.7943	2.4987	1.0854	1.0834	0.9769	0.9673	0.9307	0.916	0.9032	0.895	0.8925	0.8922	0.8922	0.8922	0.8922
pdb|1ecaA00	CATH	test	73	1788	2.496	2.2579	1.0531	1.0576	0.9726	0.9491	0.9185	0.9013	0.8888	0.8842	0.8836	0.8836	0.8836	0.8836	0.8836
pdb|1eceA00	CATH	train	133	2278	8.3455	5.8189	1.9032	1.6583	1.1653	1.1158	1.0101	0.9899	0.9568	0.9512	0.9352	0.9376	0.9286	0.9335	0.9272
pdb|1ecfA01	CATH	train	150	2830	9.2266	6.3678	2.1259	1.646	1.215	1.1199	1.0493	1.0339	1.0178	1.0194	1.0145	1.019	1.0168	1.0201	1.0199
pdb|1ecfA02	CATH	train	66	1906	1.783	1.8776	0.9971	1.0264	0.9849	0.986	0.9824	0.9824	0.9824	0.9824	0.9824	0.9824	0.9824	0.9824	0.9824
pdb|1ecmA00	CATH	test	53	1512	1.3719	1.5202	0.9758	1.0471	1.0311	1.0598	1.0699	1.0859	1.0965	1.1063	1.1132	1.1204	1.1256	1.1284	1.1301
pdb|1ecsA00	CATH	train	56	1594	1.7167	1.6873	0.9957	1.0186	0.959	0.9598	0.9252	0.9181	0.8953	0.8939	0.8866	0.886	0.886	0.886	0.886
pdb|1ed1A00	CATH	train	58	1668	1.9599	1.7962	1.0253	1.0507	0.9892	0.9933	0.9679	0.9604	0.9428	0.9276	0.9109	0.8957	0.8841	0.8765	0.871
pdb|1ed7A00	CATH	train	21	314	1.2496	1.3433	1.0081	1.018	0.9962	0.9931	0.9893	0.9886	0.9884	0.9884	0.9884	0.9884	0.9884	0.9884	0.9884
pdb|1edgA00	CATH	test	158	976	17.5917	16.7741	7.3858	7.1841	4.8234	4.5817	3.6939	3.4905	3.078	2.9254	2.7004	2.5849	2.4469	2.3575	2.2629
pdb|1edhA02	CATH	train	52	510	5.1531	3.9125	1.8178	1.4745	1.1981	1.109	1.0523	1.0278	1.0102	1.0018	0.9953	0.9931	0.9913	0.9912	0.9907
pdb|1edqA01	CATH	train	44	538	2.8137	2.702	1.2466	1.2115	1.0509	1.0336	1.0072	0.9973	0.9895	0.9859	0.9822	0.9795	0.9775	0.9755	0.9741
pdb|1edqA02	CATH	train	173	1246	21.2365	18.6753	8.4728	7.2532	4.9564	4.2628	3.4431	3.0454	2.6657	2.4226	2.2101	2.0553	1.9238	1.8197	1.733
pdb|1edqA03	CATH	test	27	392	1.462	1.7099	1.0224	1.0768	1.0017	1.013	1.0033	1.0059	1.0054	1.0056	1.0056	1.0056	1.0056	1.0056	1.0056
pdb|1edtA00	CATH	train	106	818	10.673	8.8603	3.6618	3.2318	2.1634	1.9341	1.5921	1.461	1.3222	1.2507	1.1802	1.1351	1.0964	1.0701	1.0498
pdb|1edxA00	CATH	train	20	306	1.1138	1.2157	0.9947	1.0069	0.9976	0.9981	0.9963	0.9978	0.9963	0.9978	0.9963	0.9978	0.9963	0.9978	0.9963
pdb|1edzA01	CATH	train	74	594	8.6384	6.5816	3.0424	2.365	1.7032	1.4579	1.2712	1.1782	1.1131	1.0778	1.0533	1.04	1.0316	1.0263	1.0231
pdb|1edzA02	CATH	test	62	726	4.2776	3.5534	1.4621	1.3065	1.0855	1.0474	1.0064	0.9922	0.9776	0.9718	0.9704	0.9704	0.9704	0.9704	0.9704
pdb|1ee6A00	CATH	train	81	1026	5.8869	5.4294	2.0125	1.8266	1.3088	1.2304	1.1054	1.0742	1.0376	1.0226	1.0097	1.0025	0.9986	0.9955	0.9938
pdb|1eejA01	CATH	train	23	348	1.2298	1.3344	1.0017	1.0129	0.9984	0.9973	0.9953	0.9956	0.9949	0.9944	0.993	0.9926	0.9923	0.9922	0.9921
pdb|1eemA01	CATH	train	56	530	4.9694	4.0292	1.8781	1.6991	1.3373	1.258	1.1555	1.117	1.0821	1.0644	1.0502	1.0405	1.0344	1.0288	1.0261
pdb|1eemA02	CATH	test	50	646	3.3933	2.9639	1.3707	1.2613	1.0822	1.0602	1.0313	1.0264	1.0214	1.0217	1.0204	1.0208	1.02	1.0202	1.02
pdb|1eerA00	CATH	train	83	972	6.7153	4.8431	1.8663	1.5296	1.1753	1.0976	1.0312	1.0063	0.99	0.9791	0.9724	0.9683	0.9669	0.9661	0.9658
pdb|1eerB02	CATH	train	55	934	2.2856	2.1919	1.0047	1.1033	0.9884	1.0243	1.0144	1.03	1.0369	1.0525	1.06	1.0749	1.0846	1.0944	1.1018
pdb|1eerC01	CATH	train	41	742	1.888	1.8829	1.0694	1.0518	1.009	1.0099	1.0112	1.0135	1.0145	1.0164	1.0175	1.0185	1.0191	1.0197	1.0199
pdb|1eetB02	CATH	test	45	830	2.067	1.9551	1.0758	1.0593	1.0001	0.9968	0.99	0.9901	0.9896	0.9896	0.9896	0.9896	0.9896	0.9896	0.9896
pdb|1eexA00	CATH	train	234	1816	25.6868	21.5119	9.399	7.9815	5.3581	4.5798	3.6619	3.2122	2.7855	2.5153	2.2735	2.0953	1.9441	1.8222	1.7197
pdb|1eexB00	CATH	train	81	1170	5.5417	3.819	1.4766	1.3398	1.0689	1.0491	0.9924	0.9814	0.955	0.9485	0.9296	0.9169	0.9025	0.893	0.884
pdb|1ef1A03	CATH	train	49	994	2.237	2.0415	1.0907	1.056	0.9912	0.9806	0.9688	0.9676	0.9672	0.9672	0.9672	0.9672	0.9672	0.9672	0.9672
pdb|1ef8A01	CATH	test	27	488	1.1786	1.3053	0.9907	1.0078	0.9895	0.9875	0.985	0.9849	0.9848	0.9848	0.9848	0.9848	0.9848	0.9848	0.9848
pdb|1ef8A02	CATH	train	71	714	6.3578	4.4305	1.8152	1.5735	1.1781	1.1298	1.0437	1.0357	1.0139	1.0126	1.0071	1.0075	1.0053	1.0049	1.0049
pdb|1efdN01	CATH	train	40	614	1.6886	1.7342	0.9205	1.0892	0.9681	1.0109	0.9751	0.9846	0.9616	0.9643	0.9479	0.9481	0.9366	0.9361	0.9296
pdb|1efdN02	CATH	train	78	872	6.0012	4.2732	1.6715	1.5417	1.1415	1.1268	1.0411	1.0403	1.021	1.0224	1.0179	1.0192	1.0182	1.0191	1.0183
pdb|1efnB00	CATH	test	70	1042	4.5573	3.5511	1.4269	1.2762	1.0769	1.0507	1.0255	1.0252	1.0238	1.0279	1.0303	1.0378	1.0429	1.0516	1.0603
pdb|1efuB01	CATH	train	30	572	1.4104	1.413	1.0041	1.021	1.0046	1.0043	1.0044	1.0044	1.0044	1.0044	1.0044	1.0044	1.0044	1.0044	1.0044
pdb|1efuB03	CATH	train	31	602	1.3101	1.413	1.0064	1.0362	1.0112	1.0276	1.0257	1.0381	1.0365	1.0416	1.0421	1.0422	1.0422	1.0422	1.0422
pdb|1efvB00	CATH	train	117	1090	11.9753	8.2957	3.3399	2.5616	1.6997	1.4702	1.234	1.1488	1.0668	1.0304	0.9898	0.9683	0.9433	0.9275	0.9116
pdb|1efyA01	CATH	test	67	968	4.949	3.7424	1.5301	1.3459	1.1007	1.0792	1.0429	1.0486	1.0479	1.0569	1.0617	1.0669	1.0684	1.0698	1.07
pdb|1efyA02	CATH	train	121	1424	11.9953	9.1476	3.6838	2.8421	1.9244	1.6168	1.3672	1.2441	1.1542	1.1031	1.0676	1.0437	1.0275	1.0184	1.0118
pdb|1eg2A00	CATH	train	112	1762	5.7537	4.8255	1.5556	1.4519	1.0894	1.0699	0.9963	0.983	0.9605	0.9518	0.9441	0.9421	0.938	0.9369	0.9337
pdb|1eg5B01	CATH	train	54	1102	2.3467	2.2012	1.0679	1.0661	0.997	0.9899	0.9813	0.9756	0.9736	0.973	0.9724	0.9721	0.9721	0.9721	0.9721
pdb|1eg7A02	CATH	test	53	1182	1.7292	1.8269	0.9964	1.0537	1.0067	1.0339	1.0286	1.0421	1.0421	1.0448	1.045	1.045	1.045	1.045	1.045
pdb|1eg7A03	CATH	train	49	1150	1.7245	1.7388	1.0146	1.0338	1.0116	1.0178	1.018	1.018	1.018	1.018	1.018	1.018	1.018	1.018	1.018
pdb|1eg7B01	CATH	train	151	1742	13.4743	8.9381	3.4189	2.6635	1.7104	1.5093	1.2373	1.1736	1.077	1.0502	1.0155	0.9974	0.9789	0.9681	0.9555
pdb|1egaA02	CATH	train	54	1286	2.2594	2.0082	1.0812	1.0478	0.9863	0.9757	0.9606	0.9554	0.9501	0.9493	0.9489	0.9489	0.9489	0.9489	0.9489
pdb|1egdA01	CATH	test	47	1232	1.3729	1.5507	0.9893	1.0283	1.0091	1.0187	1.0203	1.0339	1.0386	1.0485	1.0523	1.0554	1.0571	1.0573	1.0575
pdb|1eggA00	CATH	train	66	1394	4.1542	3.0594	1.3686	1.2501	1.0843	1.0645	1.0412	1.0465	1.0444	1.0538	1.0589	1.0661	1.0712	1.0752	1.0775
pdb|1egoA00	CATH	train	40	1034	1.2101	1.4002	0.9861	1.0126	0.9954	0.997	0.9956	0.9956	0.9956	0.9956	0.9956	0.9956	0.9956	0.9956	0.9956
pdb|1egpA00	CATH	train	26	524	1.1145	1.1984	0.9941	1.002	0.99	0.9862	0.983	0.983	0.983	0.983	0.983	0.983	0.983	0.983	0.983
pdb|1eh7A01	CATH	test	35	590	2.0298	1.7424	1.0787	1.0685	1.0126	1.0155	1.01	1.0171	1.0182	1.0244	1.0294	1.038	1.0433	1.0489	1.052
pdb|1eh9A01	CATH	train	180	1364	23.8284	21.0924	10.5943	8.9452	6.5219	5.6367	4.7075	4.1957	3.7265	3.4086	3.1291	2.9144	2.7326	2.5811	2.4524
pdb|1eh9A02	CATH	train	28	550	1.2109	1.3263	0.9918	1.015	0.9935	0.9963	0.9916	0.9915	0.9891	0.9882	0.9879	0.9858	0.9849	0.9843	0.9843
pdb|1eh9A03	CATH	train	44	654	3.8341	2.6899	1.4084	1.2087	1.0722	1.0325	1.0115	1.0032	0.9992	0.997	0.996	0.9955	0.9954	0.9954	0.9954
pdb|1ehiA02	CATH	test	70	920	6.1611	4.6665	2.0895	1.6511	1.2963	1.1732	1.0942	1.056	1.0335	1.0201	1.0126	1.008	1.0036	1.0004	0.9979
pdb|1ehiA03	CATH	train	34	676	1.5725	1.5128	1.0215	1.0205	1.0022	1.0031	0.9998	1	0.9991	0.9983	0.9949	0.9954	0.9949	0.9943	0.9944
pdb|1ehsA00	CATH	train	24	468	1.0659	1.1956	0.9902	1.0071	0.9912	0.9881	0.9832	0.9797	0.978	0.9781	0.978	0.978	0.978	0.978	0.978
pdb|1ehxA00	CATH	train	41	564	3.1549	2.476	1.3032	1.1782	1.0508	1.0243	0.9991	0.9916	0.9818	0.9781	0.9747	0.9686	0.9656	0.9612	0.958
pdb|1ehyA00	CATH	test	136	1130	12.1423	8.8367	3.2582	2.8676	1.7459	1.6487	1.3083	1.2769	1.1504	1.1472	1.0957	1.1028	1.0903	1.0969	1.1009
pdb|1ei1A02	CATH	train	85	1100	5.2831	4.1332	1.4866	1.4227	1.0852	1.0948	1.0313	1.0452	1.0345	1.0472	1.0508	1.0565	1.0614	1.0681	1.0751
pdb|1ei5A01	CATH	train	140	1652	9.6307	7.2416	2.3682	2.1384	1.3813	1.3103	1.12	1.0823	1.021	0.996	0.964	0.9511	0.9343	0.9224	0.91
pdb|1ei5A02	CATH	train	45	808	2.69	2.2096	1.182	1.0919	1.0278	1.0277	1.0278	1.0294	1.0296	1.0296	1.0296	1.0296	1.0296	1.0296	1.0296
pdb|1ei5A03	CATH	test	52	942	3.0835	2.4324	1.194	1.1017	1.0071	0.9849	0.9639	0.9549	0.9448	0.9408	0.9404	0.9404	0.9404	0.9404	0.9404
pdb|1ei6A01	CATH	train	131	1446	11.9445	9.0153	3.5686	2.9667	1.9883	1.7394	1.4609	1.3464	1.2458	1.1974	1.156	1.1376	1.1221	1.1167	1.1129
pdb|1ei6A02	CATH	train	47	1018	1.5912	1.7504	0.9744	1.0426	0.9809	0.9967	0.9784	0.9836	0.9705	0.9743	0.9638	0.9628	0.9569	0.9548	0.9539
pdb|1ei7A00	CATH	train	68	1234	4.034	2.947	1.2896	1.1682	1.0368	1.0173	0.9987	0.9911	0.9818	0.9754	0.9668	0.9578	0.9466	0.9359	0.9249
pdb|1ei9A00	CATH	test	122	1696	9.5846	6.6523	2.4144	1.9833	1.3934	1.2701	1.1389	1.1001	1.0664	1.0532	1.0428	1.038	1.0368	1.0357	1.0376
pdb|1eiaA01	CATH	train	47	1168	1.1852	1.5601	0.9513	1.0351	0.9784	0.9916	0.9673	0.9724	0.9479	0.9417	0.9224	0.9162	0.9025	0.8935	0.884
pdb|1eiaA02	CATH	train	49	1242	2.1932	1.8614	1.1051	1.0538	1.0115	1.0021	0.9979	0.9962	0.9943	0.9936	0.9933	0.9932	0.9932	0.9932	0.9932
pdb|1eicA00	CATH	train	55	1352	2.0365	1.9565	1.0282	1.0832	1.0043	1.0269	1.0155	1.0229	1.0207	1.0225	1.0225	1.0225	1.0225	1.0225	1.0225
pdb|1eigA00	CATH	test	33	732	1.1742	1.3375	0.979	1.0094	0.9862	0.9842	0.9802	0.9794	0.9749	0.9725	0.9679	0.9654	0.9643	0.9631	0.9635
pdb|1eijA00	CATH	train	51	868	4.3532	2.9577	1.5216	1.2649	1.0929	1.0328	0.9946	0.9786	0.971	0.9679	0.9662	0.9657	0.9654	0.9654	0.9654
pdb|1eiwA00	CATH	train	58	1014	3.6043	2.7072	1.2821	1.1774	1.0551	1.0495	1.0386	1.0457	1.0454	1.0464	1.0464	1.0464	1.0464	1.0464	1.0464
pdb|1ej0A00	CATH	train	81	1272	4.8926	3.4803	1.3636	1.3111	1.0377	1.0444	0.979	0.9826	0.9657	0.9665	0.9618	0.9616	0.9616	0.9616	0.9616
pdb|1ej2A00	CATH	test	81	1506	3.9621	3.0854	1.2413	1.1798	1.0286	1.027	1.0128	1.0142	1.0138	1.0138	1.0138	1.0138	1.0138	1.0138	1.0138
pdb|1ej5A00	CATH	train	54	1248	2.1221	2.0321	1.0655	1.0655	0.9915	0.9791	0.9662	0.9582	0.9517	0.9459	0.9376	0.9302	0.9258	0.9226	0.921
pdb|1ej8A00	CATH	train	74	1456	4.7112	3.2721	1.434	1.2399	1.0834	1.0569	1.034	1.0391	1.0348	1.0404	1.0416	1.0432	1.0438	1.0441	1.0441
pdb|1ejdA01	CATH	train	106	1824	6.9085	4.3306	1.6181	1.403	1.1111	1.0895	1.0465	1.0591	1.0521	1.0741	1.0788	1.1007	1.1154	1.1349	1.1531
pdb|1ejdA02	CATH	test	98	2042	3.9632	3.0392	1.149	1.1681	0.9719	0.9789	0.9267	0.9252	0.894	0.8915	0.867	0.8604	0.8458	0.8409	0.8291
pdb|1ejeA00	CATH	train	86	2112	2.458	2.2888	0.9778	1.0721	0.9344	0.9522	0.9014	0.9059	0.8787	0.8756	0.8593	0.8571	0.8464	0.8444	0.8345
pdb|1ejfA00	CATH	train	72	2024	2.5366	2.2381	1.0615	1.0788	1.0295	1.0449	1.0457	1.0591	1.0655	1.066	1.0657	1.0641	1.0638	1.0647	1.0647
pdb|1ejgA00	CATH	train	18	262	0.9496	1.1819	0.9828	1.0101	0.9996	1.0013	1.001	1.001	1.001	1.001	1.001	1.001	1.001	1.001	1.001
pdb|1ejxB00	CATH	test	46	406	4.976	3.8118	1.7561	1.5442	1.2228	1.1555	1.0779	1.0522	1.028	1.018	1.0092	1.0059	1.0022	1.0011	0.9998
pdb|1ejxC01	CATH	train	84	736	7.2043	5.7634	2.2688	2.0191	1.4439	1.3305	1.1759	1.1212	1.0657	1.0343	1.0128	0.9963	0.9874	0.9804	0.9735
pdb|1ejxC02	CATH	train	168	1442	16.284	13.9159	5.2464	4.3287	2.7311	2.2876	1.8163	1.6023	1.4191	1.3128	1.2325	1.1813	1.1422	1.1151	1.0947
pdb|1ek6A01	CATH	train	57	780	4.1691	3.563	1.5115	1.301	1.0915	1.0506	1.024	1.0199	1.0195	1.0204	1.0212	1.0226	1.023	1.0233	1.0233
pdb|1ek6A02	CATH	test	90	1078	5.5166	4.2974	1.4475	1.5395	1.0563	1.1364	1.0078	1.0561	1.0126	1.0366	1.0192	1.0317	1.0248	1.0319	1.029
pdb|1ekeB02	CATH	train	23	314	1.4751	1.4332	1.0189	1.0225	1	0.9985	0.9966	0.9955	0.9956	0.9955	0.9955	0.9955	0.9955	0.9955	0.9955
pdb|1ekgA00	CATH	train	57	522	6.689	5.4983	2.6839	2.1239	1.6079	1.3954	1.2462	1.1631	1.1089	1.076	1.0548	1.0418	1.0322	1.0262	1.0218
pdb|1ekjA00	CATH	train	100	916	8.491	6.9464	2.5056	2.2661	1.5064	1.4032	1.2055	1.1571	1.095	1.0732	1.0544	1.0453	1.0406	1.0379	1.0371
pdb|1ektA00	CATH	test	25	368	1.4396	1.5256	1.0352	1.0381	1.0046	1.0051	1.0005	1.0023	1.0006	1.0022	1.0009	1.0025	1.001	1.0025	1.001
pdb|1el0A00	CATH	train	31	428	2.1631	1.9361	1.1511	1.0914	1.0227	1.0097	1.001	0.9986	0.998	0.9976	0.9976	0.9976	0.9976	0.9976	0.9976
pdb|1el6A01	CATH	train	34	512	2.3117	1.9314	1.1394	1.0665	1.0191	1.0124	1.0111	1.0131	1.0139	1.0151	1.0155	1.0159	1.0159	1.0159	1.0159
pdb|1el6A03	CATH	train	45	628	2.6921	2.461	1.1809	1.1998	1.0437	1.0463	1.0194	1.0217	1.0177	1.021	1.0232	1.0268	1.0284	1.0312	1.0325
pdb|1eljA01	CATH	test	77	888	4.9298	3.747	1.4266	1.4401	1.1104	1.1122	1.0427	1.0393	1.0203	1.0191	1.0122	1.0111	1.0089	1.0095	1.0089
pdb|1eljA02	CATH	train	71	1052	3.2903	2.8437	1.1196	1.2223	0.9941	1.0499	0.9958	1.024	1.0052	1.0167	1.0122	1.0156	1.0156	1.0156	1.0156
pdb|1elkA00	CATH	train	66	1168	2.9718	2.656	1.1517	1.1292	1.021	1.0289	1.0212	1.0316	1.0343	1.0423	1.0453	1.0499	1.0551	1.0615	1.065
pdb|1elrA00	CATH	train	75	1370	4.7945	3.714	1.5256	1.2915	1.0977	1.0561	1.0297	1.0247	1.0253	1.0287	1.0358	1.0453	1.0522	1.0573	1.0589
pdb|1eluA01	CATH	test	58	1230	2.2095	2.1815	1.0582	1.0649	1.0036	1.0083	1.0008	1.0075	1.0013	1.0078	1.0012	1.0078	1.0012	1.0078	1.0012
pdb|1eluA02	CATH	train	95	1504	4.2189	3.2081	1.0626	1.3347	0.9322	1.0882	0.9551	1.0337	0.9821	1.023	0.9997	1.0208	1.0112	1.0216	1.0173
pdb|1elvA01	CATH	train	41	890	1.2169	1.4772	0.9502	1.0263	0.982	0.9963	0.9801	0.9852	0.9741	0.9751	0.9676	0.9684	0.9556	0.9587	0.9473
pdb|1elvA02	CATH	train	66	1066	4.449	3.3194	1.4083	1.2804	1.0613	1.0323	0.9874	0.9747	0.9596	0.9527	0.9463	0.9425	0.9395	0.9386	0.9377
pdb|1elvA03	CATH	test	31	644	1.2243	1.3501	0.9794	1.012	0.9844	0.986	0.9725	0.9726	0.969	0.9691	0.969	0.969	0.969	0.969	0.969
pdb|1elwA00	CATH	train	64	852	6.7237	4.7435	2.275	1.7851	1.3992	1.2476	1.1474	1.0939	1.0588	1.037	1.0218	1.0119	1.0053	1.001	0.9979
pdb|1em2A00	CATH	train	105	1260	9.2434	6.9245	2.5939	2.0595	1.4203	1.27	1.1249	1.0768	1.0392	1.0241	1.0104	1.0044	0.9999	0.9984	0.9962
pdb|1em8A00	CATH	train	68	1200	3.5069	2.8342	1.2061	1.1349	1.0259	1.0313	1.0173	1.0314	1.0291	1.0374	1.0384	1.0429	1.0449	1.0461	1.0475
pdb|1em8B00	CATH	test	49	992	1.6037	1.7271	0.9196	1.076	0.9699	1.0203	0.9908	1.0082	0.997	1.0051	0.9988	1.0047	0.9989	1.005	0.9991
pdb|1em9B00	CATH	train	70	1170	4.1945	2.918	1.2359	1.1703	1.0223	1.0084	0.979	0.9711	0.9518	0.941	0.924	0.9098	0.8945	0.8851	0.876
pdb|1emsA01	CATH	train	121	1626	8.7784	5.8296	2.0165	1.7147	1.1827	1.1386	1.0193	1.0042	0.9658	0.9571	0.9363	0.9328	0.921	0.9171	0.9076
pdb|1enfA01	CATH	train	45	1046	1.7745	1.6999	1.0196	1.0336	1.0019	1.0032	0.9996	1.001	0.9999	1.001	0.9999	1.001	0.9999	1.001	0.9999
pdb|1enfA02	CATH	test	80	1298	6.9923	4.4395	1.8889	1.4804	1.1664	1.0736	1.0105	0.9825	0.9645	0.953	0.9458	0.9415	0.9374	0.9359	0.9346
pdb|1envA00	CATH	train	64	1340	3.5458	2.5685	1.1855	1.0971	1.0182	1.0079	1.0048	1.0044	1.0045	1.0049	1.0044	1.0049	1.0044	1.0049	1.0044
pdb|1enwA00	CATH	train	61	1450	2.4587	2.0829	1.0647	1.0509	1.0031	1.0012	0.9964	0.9921	0.9952	0.9908	0.9954	0.9905	0.9954	0.9905	0.9954
pdb|1eo0A00	CATH	train	45	1216	1.453	1.4731	0.9885	1.0084	0.9692	0.9571	0.9423	0.9376	0.9368	0.9368	0.9368	0.9368	0.9368	0.9368	0.9368
pdb|1eokA00	CATH	test	123	1702	10.8924	7.8629	3.0442	2.3712	1.6073	1.3996	1.2242	1.1606	1.1195	1.1041	1.1018	1.1111	1.1232	1.1358	1.1476
pdb|1eoqA00	CATH	train	34	800	1.0628	1.251	0.9702	1.0215	0.9992	1.0088	1.0027	1.0083	1.0024	1.0088	1.0024	1.0088	1.0024	1.0088	1.0024
pdb|1eovA01	CATH	train	66	1004	6.1049	3.9812	1.7603	1.4251	1.1633	1.1032	1.0657	1.0604	1.0611	1.0666	1.0689	1.0709	1.0709	1.0709	1.0711
pdb|1ep0A00	CATH	train	90	1312	6.4625	4.4181	1.6854	1.4234	1.1136	1.0553	0.9978	0.9771	0.9558	0.9467	0.9358	0.9247	0.9132	0.8985	0.882
pdb|1ep3A00	CATH	test	140	1840	8.5375	5.4705	1.6888	1.6736	1.1051	1.1572	1.025	1.0526	1.0157	1.03	1.0203	1.0288	1.0228	1.0299	1.0237
pdb|1ep3B01	CATH	train	38	890	1.2742	1.3937	0.9794	1.018	0.9991	1.0079	1.0075	1.01	1.0108	1.0115	1.0129	1.013	1.0139	1.014	1.014
pdb|1ep3B02	CATH	train	49	982	2.3692	2.0488	1.0552	1.0753	0.9866	0.9859	0.9669	0.9659	0.9593	0.9589	0.9582	0.9581	0.958	0.9578	0.9544
pdb|1ep3B03	CATH	train	25	478	1.0993	1.1972	0.9965	1.0008	0.9908	0.9865	0.9835	0.9803	0.9791	0.9787	0.9785	0.9785	0.9785	0.9785	0.9785
pdb|1ep7A00	CATH	test	47	606	3.4346	2.6147	1.2312	1.225	1.0138	1.0358	0.9812	0.9934	0.9709	0.9766	0.9661	0.9703	0.965	0.9666	0.9649
pdb|1epaA00	CATH	train	73	856	6.4193	4.5173	1.9413	1.5653	1.2119	1.1261	1.0508	1.0271	1.008	1.0013	0.9953	0.9937	0.9911	0.992	0.9904
pdb|1epfA01	CATH	train	43	742	2.1231	2.0296	1.075	1.0777	1.0103	1.016	1.01	1.014	1.0141	1.0169	1.0188	1.0199	1.0215	1.0217	1.0229
pdb|1epfA02	CATH	train	44	836	2.0197	1.8972	1.0496	1.0582	1.0121	1.0226	1.0245	1.0336	1.0388	1.0473	1.0519	1.0557	1.0587	1.0612	1.0625
pdb|1eptA00	CATH	test	11	104	0.8511	1.0812	0.9941	1.0027	0.9987	0.9989	0.9988	0.9988	0.9988	0.9988	0.9988	0.9988	0.9988	0.9988	0.9988
pdb|1eptB00	CATH	train	37	242	4.4355	3.8611	1.9686	1.6624	1.3337	1.2156	1.126	1.0801	1.0491	1.0308	1.019	1.0119	1.007	1.0048	1.0031
pdb|1epuA01	CATH	train	73	526	7.7268	6.7282	2.7352	2.661	1.7277	1.7284	1.3977	1.3922	1.2505	1.2403	1.1716	1.1568	1.1187	1.1086	1.0854
pdb|1epuA02	CATH	train	59	630	4.5546	4.2071	1.5867	1.4744	1.1311	1.0922	1.0284	1.0155	1.0035	0.9996	0.9985	0.9984	0.9984	0.9984	0.9984
pdb|1epuA03	CATH	test	68	868	4.9125	4.1555	1.6002	1.3922	1.1174	1.0691	1.0275	1.0186	1.0137	1.0128	1.0125	1.0125	1.0125	1.0125	1.0125
pdb|1epwA02	CATH	train	157	1482	15.3104	12.2935	4.8313	3.9229	2.5307	2.1514	1.7242	1.5494	1.3873	1.3084	1.2363	1.1949	1.1611	1.1369	1.1193
pdb|1epwA03	CATH	train	100	1466	6.1137	5.4115	1.7776	1.5497	1.147	1.0771	1.0024	0.9739	0.9498	0.9404	0.9364	0.9356	0.9356	0.9356	0.9356
pdb|1epwA04	CATH	train	86	1580	4.3353	4.2453	1.4415	1.3654	1.0794	1.0749	1.0386	1.0448	1.0443	1.0522	1.0563	1.0629	1.0673	1.0711	1.0758
pdb|1eq1A00	CATH	test	81	1740	3.4229	3.3725	1.2157	1.1808	1.0219	1.0282	1.0073	1.0124	1.0059	1.0076	1.0048	1.0064	1.0059	1.0071	1.0069
pdb|1eq2A01	CATH	train	85	1942	3.1456	3.2827	1.1647	1.1935	1.0399	1.0686	1.0592	1.0771	1.0812	1.0824	1.0824	1.0824	1.0824	1.0824	1.0824
pdb|1eq2D02	CATH	train	46	864	1.9667	2.1211	1.0052	1.0875	0.9931	1.0122	0.9984	1.0016	0.9976	0.9982	0.9944	0.9925	0.987	0.9825	0.9751
pdb|1eq9A01	CATH	train	53	986	2.6176	2.4797	1.0965	1.1478	1.0151	1.0431	1.0298	1.0447	1.0438	1.0485	1.0484	1.0492	1.0492	1.0492	1.0492
pdb|1eqfA02	CATH	test	57	1116	2.9599	2.5374	1.1394	1.1192	1.0073	1.0043	0.983	0.9779	0.9695	0.9658	0.9646	0.9635	0.9629	0.9627	0.9626
pdb|1eqgA01	CATH	train	22	262	1.2258	1.4464	0.9887	1.032	0.9993	1.0038	1.0023	1.0032	1.0032	1.0032	1.0032	1.0032	1.0032	1.0032	1.0032
pdb|1eqkA00	CATH	train	59	476	7.0425	5.2331	2.3239	1.9027	1.3951	1.2601	1.1369	1.0877	1.0473	1.0285	1.0147	1.0054	1.0006	0.9975	0.995
pdb|1eqnC03	CATH	train	29	358	1.9388	1.7949	1.0345	1.0592	1.0018	1.0109	1.0062	1.0122	1.0145	1.0194	1.0235	1.0277	1.0296	1.0308	1.0306
pdb|1erdA00	CATH	test	16	184	1.0018	1.2188	0.9854	1.0096	0.9999	1.0014	1.0013	1.0004	1.0006	0.9998	0.9998	0.999	0.9989	0.9986	0.9985
pdb|1erjC00	CATH	train	165	906	20.9808	20.7502	10.1655	9.3467	6.7738	6.1289	5.1373	4.6928	4.1953	3.8922	3.5985	3.3809	3.1859	3.0275	2.8882
pdb|1ervA00	CATH	train	63	522	5.7701	4.4264	1.7709	1.641	1.1866	1.1654	1.0504	1.0409	1.0051	1.0019	0.9824	0.9794	0.9731	0.9709	0.9705
pdb|1es5A00	CATH	train	94	880	7.3412	6.5956	2.2989	2.2155	1.3835	1.3877	1.1355	1.1409	1.0465	1.0475	1.0098	1.0066	0.9862	0.9803	0.9682
pdb|1es9A00	CATH	test	98	1216	6.2238	5.3828	1.7896	1.621	1.185	1.1326	1.0481	1.02	0.9932	0.9771	0.9627	0.9526	0.9415	0.9321	0.9197
pdb|1escA00	CATH	train	139	1754	10.1054	8.1568	2.5986	2.2451	1.4242	1.327	1.1457	1.1228	1.0825	1.0784	1.0731	1.0793	1.0841	1.094	1.104
pdb|1esjA00	CATH	train	115	1998	4.2523	4.2692	1.2267	1.362	1.0048	1.0423	0.9552	0.9719	0.9364	0.9414	0.926	0.9266	0.9212	0.9206	0.9197
pdb|1eslA00	CATH	train	59	1058	2.819	2.926	1.1823	1.1878	1.0252	1.0302	1.0095	1.0154	1.0096	1.0134	1.0106	1.0147	1.0119	1.0146	1.0124
pdb|1et9A01	CATH	test	57	1138	2.5071	2.4903	1.1256	1.111	1.019	1.0209	1.0185	1.0204	1.0204	1.0204	1.0204	1.0204	1.0204	1.0204	1.0204
pdb|1et9A02	CATH	train	56	1206	2.4194	2.3832	1.1054	1.1055	1.0257	1.0328	1.0311	1.0359	1.0372	1.0398	1.041	1.0411	1.0411	1.0411	1.0411
pdb|1eteA00	CATH	train	62	1358	2.7226	2.3753	1.1271	1.0933	1.0237	1.0313	1.0309	1.0415	1.0463	1.0529	1.0557	1.0565	1.0571	1.0575	1.0575
pdb|1etxB00	CATH	train	43	878	1.6635	1.7871	1.0142	1.0361	0.9851	0.988	0.9685	0.968	0.9583	0.9564	0.9546	0.9544	0.9544	0.9544	0.9544
pdb|1eu1A01	CATH	test	82	1154	5.6019	4.0786	1.57	1.3834	1.1195	1.0696	1.0337	1.0205	1.0147	1.0134	1.013	1.013	1.013	1.013	1.013
pdb|1eu1A02	CATH	train	99	1476	4.6238	3.8152	1.2408	1.4475	0.971	1.1042	0.9487	1.0075	0.941	0.9678	0.9371	0.9485	0.9328	0.9379	0.9301
pdb|1eu1A03	CATH	train	42	958	1.348	1.5382	0.9537	1.0235	0.9806	0.9911	0.9825	0.9833	0.982	0.982	0.982	0.982	0.982	0.982	0.982
pdb|1eu1A04	CATH	train	73	1172	5.0904	3.4903	1.4591	1.3248	1.0848	1.0721	1.031	1.0292	1.0211	1.021	1.0186	1.0189	1.0181	1.0183	1.0182
pdb|1eu3A01	CATH	test	61	1234	3.0323	2.612	1.1575	1.1363	1.0026	0.9868	0.9633	0.9567	0.9511	0.9476	0.9422	0.9395	0.937	0.936	0.9344
pdb|1eu3A02	CATH	train	42	1046	1.3581	1.482	0.9659	1.0171	0.9757	0.975	0.9561	0.9475	0.9337	0.9243	0.9187	0.9182	0.918	0.918	0.918
pdb|1eu8A01	CATH	train	92	1346	7.5333	5.2909	2.3234	1.9057	1.4464	1.2992	1.1622	1.1013	1.0468	1.0205	0.9977	0.9847	0.975	0.9681	0.9629
pdb|1eu8A02	CATH	train	98	1662	5.6833	4.2312	1.5305	1.3549	1.1025	1.0913	1.073	1.0831	1.0914	1.1005	1.1139	1.1306	1.1489	1.1612	1.1687
pdb|1euhA01	CATH	test	114	2054	5.3567	4.4739	1.4167	1.4332	1.0412	1.0585	0.9607	0.9619	0.9251	0.9217	0.9038	0.8973	0.8879	0.8829	0.8762
pdb|1euhA02	CATH	train	83	1930	2.8401	2.5953	1.0595	1.1047	0.9993	1.0221	1.015	1.0274	1.0322	1.0411	1.0472	1.0555	1.0657	1.0838	1.0959
pdb|1eumA00	CATH	train	76	1928	2.7106	2.5255	1.0706	1.0873	1.0202	1.0206	1.0206	1.0206	1.0206	1.0206	1.0206	1.0206	1.0206	1.0206	1.0206
pdb|1euvB00	CATH	train	49	1288	1.7722	1.7097	0.967	1.0336	0.9851	0.9861	0.9852	0.9852	0.9852	0.9852	0.9852	0.9852	0.9852	0.9852	0.9852
pdb|1euwA00	CATH	test	52	1352	1.5278	1.6409	0.9604	1.0314	0.9596	0.9697	0.9437	0.9457	0.9328	0.933	0.9316	0.9316	0.9316	0.9316	0.9316
pdb|1ev0A00	CATH	train	38	944	1.3887	1.3947	0.9798	1.015	0.9891	0.9856	0.9688	0.9561	0.9465	0.9452	0.945	0.945	0.945	0.945	0.945
pdb|1ev2E01	CATH	train	46	1006	2.4415	1.9941	1.1019	1.0864	1.0165	1.0224	1.0249	1.0437	1.0506	1.0654	1.0754	1.0881	1.0952	1.0993	1.1017
pdb|1ev7A01	CATH	train	93	1332	8.2713	5.794	2.4895	1.9912	1.5009	1.3406	1.2178	1.1602	1.1182	1.0967	1.0827	1.074	1.0673	1.0631	1.0607
pdb|1ev7B02	CATH	test	59	1220	3.0897	2.3576	1.1053	1.0979	1.0139	1.0205	1.0141	1.017	1.0167	1.0169	1.0169	1.0169	1.0169	1.0169	1.0169
pdb|1evhA00	CATH	train	44	1104	1.4343	1.5667	0.9804	1.0281	0.9978	1.0053	1.0009	1.0025	1.0017	1.0023	1.0025	1.0027	1.0025	1.0027	1.0025
pdb|1evlA01	CATH	train	131	1642	13.3414	9.2787	3.9057	2.7796	1.8907	1.5521	1.3288	1.2233	1.1599	1.1359	1.1247	1.1252	1.1265	1.1273	1.1302
pdb|1evlA02	CATH	train	66	1386	4.1436	2.9017	1.2975	1.1703	1.0396	1.0262	1.0082	1.0097	1.0117	1.0183	1.0228	1.0266	1.0282	1.0291	1.0294
pdb|1evsA00	CATH	test	96	1710	6.7649	4.7539	1.8522	1.5608	1.1699	1.0883	1.0052	0.9775	0.9541	0.9466	0.9396	0.9376	0.9369	0.9363	0.9361
pdb|1evuA01	CATH	train	85	1844	4.2732	3.3132	1.3358	1.2066	1.0718	1.0674	1.0626	1.0644	1.0634	1.0632	1.0632	1.0632	1.0632	1.0632	1.0632
pdb|1evyA01	CATH	train	80	1974	2.458	2.3716	1.0275	1.0699	0.972	0.9806	0.958	0.9609	0.9496	0.9472	0.9412	0.9395	0.9337	0.9298	0.9257
pdb|1evyA02	CATH	train	63	1758	1.7266	1.8321	0.9854	1.056	1.0233	1.0515	1.0535	1.0544	1.0544	1.0544	1.0544	1.0544	1.0544	1.0544	1.0544
pdb|1ew4A00	CATH	test	62	1840	1.8412	1.8676	0.9865	1.0555	1.0145	1.0288	1.0232	1.0294	1.0244	1.03	1.025	1.03	1.0251	1.03	1.0251
pdb|1ew6A00	CATH	train	70	1966	2.7031	2.1928	1.0555	1.0503	0.9689	0.9615	0.9514	0.951	0.951	0.951	0.951	0.951	0.951	0.951	0.951
pdb|1ewfA01	CATH	train	100	2268	6.7746	4.3005	1.6214	1.3463	1.0989	1.0565	1.0313	1.0237	1.0217	1.0206	1.0206	1.0206	1.0206	1.0206	1.0206
pdb|1ewfA02	CATH	train	107	2566	3.6457	2.7845	0.9887	1.2258	0.9545	1.0986	1.0105	1.0874	1.0507	1.0924	1.0762	1.0966	1.0909	1.1008	1.099
pdb|1ewiA00	CATH	test	39	1048	1.0216	1.376	0.9392	1.0284	0.9919	1.0032	0.9959	0.9983	0.995	0.9972	0.9948	0.9971	0.9948	0.9976	0.9948
pdb|1ewkA01	CATH	train	146	1674	15.5617	10.9486	4.5219	3.2991	2.1859	1.7893	1.4873	1.3462	1.2462	1.1967	1.1621	1.148	1.1388	1.1335	1.1354
pdb|1ewkB02	CATH	train	94	1666	6.5553	4.7969	1.7858	1.4874	1.1692	1.119	1.0738	1.0679	1.0664	1.0697	1.0736	1.0751	1.0802	1.084	1.0853
pdb|1ewnA00	CATH	train	104	2012	4.9754	3.967	1.315	1.3372	1.0493	1.0852	1.0466	1.0765	1.0805	1.1093	1.1315	1.1558	1.1748	1.1945	1.2092
pdb|1ewqA01	CATH	test	62	1492	2.5351	2.2137	1.0424	1.105	1.0065	1.035	1.0279	1.0383	1.0399	1.0448	1.0459	1.0467	1.0469	1.0469	1.0469
pdb|1ewqA02	CATH	train	47	1220	1.3273	1.5195	0.9585	1.0477	1.0199	1.042	1.0558	1.0739	1.0825	1.0906	1.0978	1.1014	1.1044	1.1059	1.1081
pdb|1ewqA03	CATH	train	75	1432	5.0367	3.1527	1.3448	1.2153	1.0286	1.0169	0.9746	0.9629	0.9367	0.9271	0.9016	0.8924	0.873	0.8638	0.8529
pdb|1ewqA05	CATH	train	93	1736	4.9581	3.6237	1.3666	1.2968	1.0362	1.0222	0.9561	0.9395	0.9079	0.8917	0.8721	0.8588	0.8478	0.8367	0.8253
pdb|1ex0A03	CATH	test	68	1658	2.9475	2.338	1.0958	1.075	0.9978	1.0165	0.9864	1.012	0.9857	1.01	0.9851	1.0102	0.9847	1.0096	0.9845
pdb|1ex0A04	CATH	train	56	1526	1.9431	1.788	1.0029	1.0222	0.9661	0.956	0.9427	0.9326	0.9246	0.9226	0.9221	0.9221	0.9221	0.9221	0.9221
pdb|1ex2A00	CATH	train	97	1844	7.583	4.5595	1.8888	1.486	1.2011	1.1414	1.0897	1.0897	1.0813	1.0782	1.0755	1.0742	1.0737	1.0734	1.0734
pdb|1ex7A01	CATH	train	25	446	1.0513	1.2999	0.9668	1.0225	0.9902	1.0013	0.9878	0.9873	0.98	0.9804	0.9738	0.9727	0.9689	0.9676	0.9652
pdb|1exeA00	CATH	test	49	580	4.8536	3.5978	1.8187	1.5186	1.2463	1.1576	1.0942	1.0677	1.0483	1.0409	1.0343	1.0309	1.0289	1.0273	1.0264
pdb|1exgA00	CATH	train	27	480	1.1825	1.4717	0.9745	1.0338	0.9966	1.0101	1.0078	1.0117	1.0128	1.0156	1.0162	1.0168	1.0169	1.0169	1.0169
pdb|1exkA00	CATH	train	39	570	2.9578	2.5685	1.3273	1.2367	1.0716	1.048	1.0157	1.0117	1.0029	1.0047	1.0005	1.0033	0.9996	1.003	0.9995
pdb|1exqA00	CATH	train	69	832	5.231	4.0424	1.7049	1.5175	1.1744	1.1181	1.0404	1.0187	0.9943	0.9865	0.9761	0.9724	0.965	0.9621	0.957
pdb|1exrA01	CATH	test	38	714	1.8895	1.7505	1.0565	1.038	0.9946	0.9881	0.9832	0.9828	0.9828	0.9828	0.9828	0.9828	0.9828	0.9828	0.9828
pdb|1exrA02	CATH	train	36	726	1.6482	1.585	1.0255	1.0273	1.0048	1.0099	1.0093	1.013	1.0139	1.0158	1.0137	1.0106	1.0087	1.0077	1.0074
pdb|1extA01	CATH	train	38	792	1.3671	1.6927	0.9343	1.075	0.9763	1.0249	1.0048	1.0279	1.0211	1.0356	1.0341	1.0373	1.0374	1.0375	1.0375
pdb|1extA02	CATH	train	24	456	1.0104	1.2232	0.9762	1.0178	1.0066	1.0186	1.0221	1.0268	1.0288	1.0297	1.0299	1.03	1.03	1.03	1.03
pdb|1exzB00	CATH	test	80	756	9.5193	6.7696	3.0423	2.3178	1.6881	1.4574	1.2885	1.2024	1.1403	1.1015	1.0759	1.0601	1.0477	1.0398	1.0337
pdb|1ey0A00	CATH	train	88	1080	7.8214	6.338	2.3906	1.9175	1.3514	1.2169	1.091	1.0423	1.0016	0.9758	0.9583	0.9459	0.9356	0.931	0.9296
pdb|1ey1A00	CATH	train	67	1066	3.4293	2.9647	1.188	1.1901	1.0134	1.0275	0.9966	1.0065	0.9965	1.0045	0.9972	1.0037	0.9971	1.0035	0.9978
pdb|1eyeA00	CATH	train	117	1472	5.5666	3.8776	1.107	1.4967	0.9205	1.1664	0.9476	1.0802	0.9817	1.0536	1.0054	1.051	1.0263	1.0541	1.0421
pdb|1eyhA00	CATH	test	77	1456	3.6425	3.1569	1.233	1.1898	1.0404	1.0362	1.0204	1.0231	1.0203	1.0231	1.0205	1.0234	1.0206	1.0234	1.0206
pdb|1eyqA01	CATH	train	34	642	1.5271	1.4793	0.9867	1.019	0.9935	0.9966	0.9925	0.9931	0.9915	0.9924	0.9913	0.9923	0.9913	0.9923	0.9913
pdb|1eyqA02	CATH	train	70	864	6.1122	4.4887	1.9965	1.6114	1.266	1.1545	1.0711	1.0372	1.0074	0.9934	0.9806	0.9752	0.9719	0.9698	0.969
pdb|1eysH01	CATH	train	45	806	1.7422	1.7591	0.9679	1.0667	0.9846	1.0134	0.9944	1.0062	0.996	1.001	0.9956	0.9973	0.995	0.9949	0.9949
pdb|1eyvB00	CATH	test	60	972	3.5179	2.6277	1.1749	1.1443	1.0099	1.0167	0.9963	1.0005	0.9939	0.9987	0.9943	0.9987	0.9946	0.9987	0.9946
pdb|1ez0A02	CATH	train	64	1148	3.0928	2.7441	1.1788	1.1632	1.0068	1	0.9656	0.9584	0.9444	0.9437	0.9376	0.938	0.9374	0.9374	0.9374
pdb|1ez0B01	CATH	train	127	1620	7.6105	5.222	1.6644	1.7694	1.1355	1.2225	1.035	1.0786	1.0097	1.0372	1.0062	1.0223	1.0053	1.0181	1.0042
pdb|1ez3A00	CATH	train	67	1444	3.2285	2.6657	1.1682	1.0968	1.0007	0.9869	0.9777	0.9769	0.9769	0.9769	0.9769	0.9769	0.9769	0.9769	0.9769
pdb|1ezfA00	CATH	test	143	1996	12.8984	8.8751	3.4028	2.4873	1.7013	1.4268	1.2359	1.1435	1.0828	1.0484	1.0254	1.0111	1.0006	0.9956	0.9892
pdb|1ezgA00	CATH	train	25	490	0.6177	1.3249	0.8451	1.0879	0.953	1.0284	0.9729	1.0014	0.9735	0.9853	0.9708	0.9768	0.9695	0.9711	0.9688
pdb|1eziA00	CATH	train	107	930	12.9168	10.5799	5.1793	4.1666	3.0436	2.5662	2.1646	1.9159	1.7227	1.5852	1.4753	1.3894	1.3222	1.2673	1.223
pdb|1ezjA01	CATH	train	30	540	1.6084	1.5531	1.0358	1.0428	1.0048	1.008	1.0061	1.0064	1.0064	1.0064	1.0064	1.0064	1.0064	1.0064	1.0064
pdb|1ezjA02	CATH	test	32	578	2.047	1.6784	1.1052	1.0524	1.0151	1.0087	1.0099	1.0104	1.0149	1.0179	1.0192	1.0188	1.0188	1.0188	1.0187
pdb|1ezwA00	CATH	train	148	1178	13.8804	10.5965	4.0996	3.8208	2.2562	2.2241	1.6301	1.6172	1.3516	1.3305	1.1951	1.174	1.0974	1.0815	1.0339
pdb|1ezxC00	CATH	train	67	946	3.9547	3.9417	1.5415	1.609	1.1849	1.1878	1.0788	1.0742	1.0436	1.0432	1.0361	1.0387	1.039	1.0408	1.043
pdb|1f00I01	CATH	train	44	816	2.1269	1.9854	1.0785	1.0649	1.0143	1.0135	1.011	1.0151	1.0172	1.0229	1.0252	1.0302	1.0315	1.0347	1.0359
pdb|1f00I02	CATH	test	35	706	1.4002	1.5558	0.9942	1.0339	0.9978	1.0135	1.0041	1.0164	1.0097	1.0187	1.0183	1.02	1.0205	1.0209	1.0209
pdb|1f00I03	CATH	train	45	812	2.8268	2.1677	1.1547	1.0952	1.0201	1.0174	1.0142	1.0179	1.0202	1.0246	1.0261	1.0291	1.0336	1.0375	1.0408
pdb|1f02T00	CATH	train	38	826	1.7584	1.5851	1.0306	1.0151	0.9831	0.9724	0.9638	0.9604	0.96	0.96	0.96	0.96	0.96	0.96	0.96
pdb|1f06A01	CATH	train	71	1062	5.0335	3.7297	1.6367	1.431	1.1585	1.1096	1.0608	1.0538	1.046	1.0483	1.0487	1.0508	1.0559	1.0638	1.067
pdb|1f06A02	CATH	test	63	1180	3.4187	2.6638	1.2159	1.1313	1.0166	1.0107	0.9944	0.9938	0.9913	0.9908	0.9906	0.9906	0.9906	0.9906	0.9906
pdb|1f08B00	CATH	train	71	1392	3.6167	2.8753	1.2316	1.1573	1.048	1.0498	1.0472	1.053	1.0588	1.0678	1.0773	1.0844	1.0883	1.0897	1.0938
pdb|1f0cA01	CATH	train	77	1612	3.8069	3.075	1.2875	1.1532	1.0116	0.9776	0.9492	0.9422	0.94	0.94	0.94	0.94	0.94	0.94	0.94
pdb|1f0kA01	CATH	train	71	1712	1.9969	2.1342	0.9775	1.0827	0.9815	0.9948	0.9731	0.9652	0.9505	0.9426	0.9352	0.932	0.9308	0.9306	0.9289
pdb|1f0kA02	CATH	test	66	1756	1.6044	1.9079	0.953	1.0556	0.9825	0.9999	0.9826	0.9813	0.9667	0.9585	0.9485	0.9437	0.9374	0.9404	0.9433
pdb|1f0lA01	CATH	train	95	2056	5.7832	3.8775	1.4725	1.286	1.0884	1.0661	1.0447	1.0397	1.0381	1.0374	1.0374	1.0374	1.0374	1.0374	1.0374
pdb|1f0lB02	CATH	train	79	2146	2.6451	2.2981	1.0738	1.0692	1.0154	1.0257	1.0259	1.0315	1.0345	1.0364	1.0382	1.0385	1.0407	1.0416	1.043
pdb|1f0lB03	CATH	train	81	2336	2.7485	2.3573	1.1015	1.111	1.071	1.0985	1.1073	1.1218	1.1225	1.1226	1.1226	1.1226	1.1226	1.1226	1.1226
pdb|1f0xA01	CATH	test	46	1266	1.3113	1.4583	0.9853	1.0141	0.9966	1.0018	0.9968	0.9984	0.9965	0.9983	0.9965	0.9983	0.9965	0.9983	0.9965
pdb|1f0xA03	CATH	train	89	1558	8.7326	5.8327	2.616	1.9158	1.4322	1.2506	1.1403	1.0893	1.0601	1.0455	1.0373	1.0337	1.0318	1.0308	1.0303
pdb|1f0xA04	CATH	train	43	1216	1.2443	1.3426	0.9849	1.022	1.0066	1.0107	1.0189	1.0222	1.0269	1.0368	1.0415	1.0454	1.0471	1.0489	1.0495
pdb|1f0xB02	CATH	train	76	1432	5.7835	3.6973	1.6568	1.3501	1.1356	1.0761	1.0362	1.0238	1.0128	1.0064	1.0027	0.9997	0.9965	0.992	0.9883
pdb|1f0yA01	CATH	test	76	1614	3.3579	2.6588	1.1552	1.1324	1.0311	1.0338	1.0277	1.039	1.0419	1.0559	1.0645	1.0765	1.0883	1.1053	1.1211
pdb|1f0yA02	CATH	train	43	1260	1.2173	1.3173	0.9797	1.0012	0.9708	0.9619	0.953	0.9453	0.9362	0.9287	0.9191	0.9172	0.9142	0.9137	0.9096
pdb|1f15B00	CATH	train	90	1562	7.3461	5.0852	2.1863	1.7607	1.3147	1.1877	1.0647	1.0163	0.9779	0.9618	0.9493	0.9422	0.9376	0.935	0.9338
pdb|1f16A00	CATH	train	92	1828	5.2111	3.7712	1.4998	1.335	1.1186	1.1131	1.0948	1.1093	1.1177	1.1289	1.1352	1.1394	1.1406	1.1406	1.1406
pdb|1f1eA00	CATH	test	78	1868	3.4162	2.5558	1.1487	1.0737	0.9837	0.9703	0.9613	0.9612	0.9612	0.9612	0.9612	0.9612	0.9612	0.9612	0.9612
pdb|1f1mA00	CATH	train	103	2196	7.4185	4.4901	1.6934	1.335	1.0678	0.9888	0.9231	0.8962	0.8793	0.8747	0.8733	0.8724	0.8724	0.8724	0.8724
pdb|1f1sA03	CATH	train	34	890	0.9804	1.2168	0.9651	1.0006	0.9683	0.9714	0.9577	0.9571	0.9549	0.9548	0.9548	0.9548	0.9548	0.9548	0.9548
pdb|1f1uA01	CATH	train	78	1142	7.6702	5.3739	2.6336	2.0496	1.5689	1.3754	1.2228	1.1586	1.0893	1.0734	1.0356	1.0377	1.0114	1.0223	0.9998
pdb|1f1uA02	CATH	test	94	1492	8.0002	6.009	2.3542	1.8082	1.3162	1.1668	1.0602	1.0134	0.9838	0.9663	0.9571	0.9509	0.9488	0.9472	0.9465
pdb|1f20A01	CATH	train	86	1694	4.5213	3.6714	1.3964	1.2353	1.0417	1.0003	0.9597	0.9384	0.9153	0.8921	0.8676	0.8544	0.8432	0.8404	0.8396
pdb|1f20A02	CATH	train	74	1702	2.9042	2.5797	1.0989	1.0893	0.9735	0.9625	0.9408	0.9396	0.9388	0.9388	0.9388	0.9388	0.9388	0.9388	0.9388
pdb|1f20A03	CATH	train	47	1172	1.5778	1.635	0.9928	1.0385	1.0023	1.0165	1.0106	1.0189	1.0153	1.0228	1.0167	1.0234	1.0168	1.0236	1.0171
pdb|1f2dA02	CATH	test	42	1094	1.2365	1.4487	0.9702	1.0177	0.9793	0.9828	0.9722	0.9706	0.9643	0.9635	0.9621	0.962	0.9618	0.9618	0.9618
pdb|1f2lD00	CATH	train	35	934	0.9993	1.251	0.9814	1.025	1.0205	1.0361	1.042	1.0488	1.0554	1.0589	1.0629	1.0662	1.0685	1.0697	1.07
pdb|1f2nC00	CATH	train	101	1348	9.9778	6.9536	2.9232	2.2209	1.5699	1.3694	1.2067	1.141	1.0932	1.0717	1.0556	1.0475	1.0437	1.0414	1.0419
pdb|1f2qA02	CATH	train	50	1114	2.1966	1.9023	1.0519	1.0849	1.0207	1.0393	1.0313	1.0397	1.0388	1.04	1.04	1.04	1.04	1.04	1.04
pdb|1f2vA00	CATH	test	82	1370	4.3497	3.1686	1.2349	1.2375	1.0296	1.0444	1.0149	1.022	1.0171	1.0217	1.0229	1.0264	1.0285	1.0326	1.035
pdb|1f35A00	CATH	train	87	1650	5.445	3.7989	1.4907	1.2656	1.0714	1.0362	1.0076	0.9928	0.9826	0.9697	0.9565	0.9442	0.9286	0.9189	0.9077
pdb|1f39A00	CATH	train	41	1084	1.1584	1.3519	0.9671	1.0117	0.9837	0.9926	0.985	0.987	0.9852	0.9867	0.9851	0.9867	0.9851	0.9867	0.9851
pdb|1f3lA01	CATH	train	65	1258	4.0367	2.7101	1.296	1.166	1.0412	1.0172	0.9939	0.9846	0.9772	0.9698	0.9666	0.9597	0.9533	0.9434	0.9331
pdb|1f3mA00	CATH	test	40	1112	1.2656	1.3348	0.9832	0.9918	0.9694	0.9637	0.9601	0.96	0.96	0.96	0.96	0.96	0.96	0.96	0.96
pdb|1f3rB02	CATH	train	29	684	0.8432	1.278	0.9227	1.0406	0.9722	1.003	0.9797	0.9889	0.9766	0.9806	0.9754	0.9768	0.9752	0.9752	0.9752
pdb|1f3vA00	CATH	train	81	974	6.2498	4.5598	1.919	1.7822	1.3044	1.2651	1.1422	1.1323	1.0977	1.0957	1.0882	1.0854	1.0836	1.0811	1.081
pdb|1f3yA00	CATH	train	72	1154	4.5711	3.4172	1.4355	1.2504	1.0755	1.0441	1.0238	1.0219	1.02	1.022	1.0235	1.0265	1.0258	1.0295	1.0286
pdb|1f42A01	CATH	test	45	916	2.1447	1.8375	1.0736	1.0439	1.0024	0.9969	0.9944	0.9897	0.9898	0.9865	0.9854	0.9823	0.9823	0.9789	0.9765
pdb|1f42A02	CATH	train	34	790	1.3073	1.4058	1.008	1.0183	1.0025	1.0032	1.0031	1.0037	1.0036	1.0037	1.0038	1.0038	1.0038	1.0038	1.0038
pdb|1f42A03	CATH	train	54	932	4.2916	2.7415	1.3251	1.1552	1.0221	0.9976	0.9797	0.9763	0.9746	0.9744	0.9744	0.9744	0.9744	0.9744	0.9744
pdb|1f45B00	CATH	train	90	1274	7.7482	5.5722	2.4351	1.9006	1.3999	1.2556	1.1407	1.1027	1.0727	1.0679	1.0617	1.0653	1.0643	1.0706	1.0746
pdb|1f46B00	CATH	test	57	1172	2.6871	2.1586	1.098	1.0671	1.0169	1.02	1.0187	1.0227	1.0243	1.0261	1.0263	1.029	1.0305	1.0342	1.0372
pdb|1f4pA00	CATH	train	66	1342	3.119	2.4704	1.124	1.1192	1.0108	1.012	0.9975	0.9932	0.9909	0.9807	0.979	0.9683	0.9643	0.9571	0.9513
pdb|1f4sP00	CATH	train	32	782	1.1376	1.2763	0.976	1.0078	0.9938	0.9931	0.993	0.993	0.993	0.993	0.993	0.993	0.993	0.993	0.993
pdb|1f53A00	CATH	train	41	850	2.1776	1.7847	1.0557	1.0674	1.0116	1.0256	1.0232	1.0347	1.0371	1.0412	1.0443	1.047	1.051	1.0522	1.0536
pdb|1f5mA00	CATH	test	76	1100	6.9398	5.0128	2.2492	1.7569	1.3561	1.2193	1.1271	1.085	1.0618	1.0491	1.0437	1.0429	1.0433	1.0447	1.0461
pdb|1f5nA01	CATH	train	159	1746	17.2524	13.582	5.8584	4.4805	2.9771	2.4114	1.9379	1.6837	1.4921	1.3662	1.2726	1.2044	1.1562	1.119	1.0898
pdb|1f5qB01	CATH	train	40	932	1.1408	1.521	0.9099	1.0615	0.9635	1.0096	0.9803	0.9999	0.985	0.996	0.986	0.9948	0.9844	0.9946	0.9824
pdb|1f5qB02	CATH	train	74	1176	6.7488	4.6873	2.2249	1.7398	1.3723	1.2262	1.1207	1.0617	1.024	0.9998	0.9806	0.9684	0.9597	0.9547	0.9516
pdb|1f5tA02	CATH	test	26	556	1.0567	1.1567	0.9909	1.0111	1.0133	1.0237	1.0335	1.0384	1.04	1.04	1.04	1.04	1.04	1.04	1.04
pdb|1f5xA00	CATH	train	103	1002	12.5828	9.8981	4.7952	3.5383	2.524	2.0306	1.689	1.4789	1.3361	1.2395	1.1745	1.1249	1.0938	1.0691	1.0519
pdb|1f60A03	CATH	train	48	770	2.8137	2.233	1.1498	1.0931	1.0095	0.9986	0.9888	0.9877	0.9872	0.9872	0.9872	0.9872	0.9872	0.9872	0.9872
pdb|1f60B00	CATH	train	43	812	2.2873	1.9503	1.1052	1.0634	1.0162	1.0192	1.0155	1.0235	1.024	1.0297	1.0321	1.0328	1.0332	1.0332	1.0332
pdb|1f62A00	CATH	test	27	576	1.0557	1.1679	0.9907	1.0011	0.9936	0.9872	0.9799	0.9708	0.9641	0.9578	0.9561	0.957	0.9575	0.9577	0.9578
pdb|1f6bB00	CATH	train	83	890	7.3147	5.2473	2.1657	1.8086	1.3274	1.2255	1.1164	1.0891	1.0599	1.0564	1.05	1.0523	1.0537	1.057	1.0605
pdb|1f6fA00	CATH	train	82	1154	5.5205	4.3849	1.6943	1.4402	1.1497	1.096	1.0491	1.037	1.0297	1.0297	1.0274	1.0238	1.0209	1.0162	1.0128
pdb|1f6fB01	CATH	train	50	888	2.7825	2.3731	1.1337	1.1181	1.0173	1.0219	1.0123	1.0212	1.0225	1.0257	1.0273	1.0302	1.0315	1.0341	1.0347
pdb|1f6fB02	CATH	test	59	1054	3.8209	2.9546	1.3388	1.2075	1.0704	1.0502	1.0374	1.037	1.037	1.0371	1.0371	1.0372	1.0375	1.0376	1.0378
pdb|1f6kC00	CATH	train	139	1612	12.3367	8.757	3.2579	2.7045	1.746	1.5889	1.3253	1.2731	1.1879	1.1677	1.1377	1.1305	1.1206	1.1194	1.1171
pdb|1f6vA00	CATH	train	50	1114	2.0485	1.8866	1.0459	1.0337	0.9835	0.9726	0.9618	0.9612	0.9612	0.9612	0.9612	0.9612	0.9612	0.9612	0.9612
pdb|1f7cA00	CATH	train	95	1458	7.3721	4.6438	1.8428	1.4985	1.1861	1.115	1.0605	1.0411	1.0285	1.0226	1.0191	1.0173	1.0162	1.0156	1.0151
pdb|1f7dA00	CATH	test	47	1152	1.429	1.5768	0.9975	1.0353	1.0104	1.0265	1.0251	1.0311	1.033	1.0346	1.0351	1.0356	1.0356	1.0357	1.0357
pdb|1f7lA00	CATH	train	61	1308	3.4099	2.4919	1.21	1.1042	1.0214	1.0094	1.0038	1.005	1.0048	1.0057	1.0054	1.0058	1.0054	1.0058	1.0054
pdb|1f7uA01	CATH	train	172	2018	17.4561	12.0043	4.6724	3.4369	2.188	1.7995	1.4598	1.3146	1.1993	1.135	1.0872	1.0561	1.0349	1.0179	1.0041
pdb|1f7uA02	CATH	train	54	1384	1.7566	1.7472	1.0022	1.0458	1.0223	1.0399	1.0505	1.0649	1.0807	1.0913	1.1009	1.1107	1.1166	1.1212	1.1238
pdb|1f7uA03	CATH	test	65	1522	2.9488	2.2012	1.097	1.0649	0.9733	0.9652	0.9246	0.9155	0.896	0.8877	0.8826	0.8819	0.8814	0.8814	0.8814
pdb|1f81A00	CATH	train	38	952	1.3698	1.4679	0.9802	1.0129	0.9802	0.9755	0.9633	0.9536	0.9413	0.9264	0.9169	0.9109	0.91	0.91	0.91
pdb|1f86A00	CATH	train	50	1058	2.658	2.0076	1.1016	1.0624	1.0034	0.9989	0.9933	0.9929	0.9929	0.993	0.9931	0.9931	0.9931	0.9931	0.9931
pdb|1f89A00	CATH	train	141	1640	14.9906	10.5701	4.4022	3.1766	2.1322	1.7474	1.4683	1.3318	1.2373	1.1794	1.142	1.1181	1.1011	1.0887	1.0801
pdb|1f8dA00	CATH	test	167	2310	11.707	9.9652	3.1272	2.7763	1.6466	1.5283	1.2285	1.1774	1.0745	1.0484	1.0073	0.9944	0.9763	0.9688	0.9586
pdb|1f8fA01	CATH	train	98	1920	4.2837	3.6684	1.2445	1.2396	1.019	1.0115	0.9668	0.9502	0.9313	0.9194	0.9031	0.8947	0.8859	0.8789	0.8703
pdb|1f8fA02	CATH	train	58	1398	1.8484	1.836	0.9835	1.033	0.9522	0.9566	0.9293	0.9258	0.9102	0.9047	0.8978	0.8974	0.8974	0.8974	0.8974
pdb|1f8nA01	CATH	train	76	1596	4.6483	3.0943	1.3606	1.1652	1.0198	0.9767	0.939	0.9186	0.9078	0.9059	0.9058	0.9058	0.9058	0.9058	0.9058
pdb|1f8nA02	CATH	test	53	1436	1.8118	1.7495	0.9962	1.033	0.9928	0.9964	0.9917	0.9903	0.9896	0.9896	0.9896	0.9896	0.9896	0.9896	0.9896
pdb|1f8nA03	CATH	train	40	1096	1.1152	1.3557	0.9667	1.0345	1.018	1.0465	1.0514	1.0725	1.0797	1.0851	1.0901	1.091	1.0916	1.0916	1.0916
pdb|1f8nA04	CATH	train	57	1224	3.1467	2.189	1.1617	1.1	1.0392	1.0373	1.0371	1.0424	1.0451	1.053	1.057	1.0617	1.0631	1.0654	1.0656
pdb|1f8vC00	CATH	train	114	1656	8.0881	5.7928	2.0926	1.782	1.2436	1.1699	1.0468	1.0136	0.9723	0.9526	0.9272	0.917	0.9015	0.8924	0.8834
pdb|1f8vD00	CATH	test	19	298	1.0439	1.166	0.992	1.0022	0.9946	0.9938	0.9932	0.9929	0.9931	0.9929	0.9929	0.9929	0.9929	0.9929	0.9929
pdb|1f8vE00	CATH	train	9	68	1.0031	1.0552	1.0042	1.001	0.999	0.999	0.9982	0.998	0.998	0.998	0.998	0.998	0.998	0.998	0.998
pdb|1f8yA00	CATH	train	79	382	10.7963	10.1705	5.0745	4.6753	3.4991	3.1719	2.7252	2.4979	2.2673	2.1111	1.9687	1.858	1.7602	1.6781	1.6065
pdb|1f94A00	CATH	train	33	242	4.2386	4.1381	2.1576	1.8801	1.4883	1.346	1.2212	1.1558	1.1073	1.0758	1.0535	1.0384	1.0277	1.0199	1.014
pdb|1f97A01	CATH	test	39	356	3.1536	3.5178	1.5398	1.5341	1.1823	1.1562	1.0683	1.0543	1.0267	1.0203	1.011	1.0081	1.0054	1.0041	1.003
pdb|1f97A02	CATH	train	50	520	3.9598	3.6414	1.5268	1.3896	1.123	1.0768	1.0267	1.0099	0.9944	0.9859	0.9797	0.9755	0.9741	0.9739	0.9738
pdb|1f9vA00	CATH	train	160	1202	18.713	17.3034	7.716	6.5534	4.4125	3.7335	2.975	2.5896	2.243	2.0164	1.8293	1.6892	1.5767	1.492	1.4209
pdb|1f9yA00	CATH	train	70	866	3.9165	3.8648	1.3197	1.4588	1.0581	1.1134	1.0056	1.0202	0.9859	0.9864	0.9751	0.9737	0.9697	0.9681	0.9663
pdb|1f9zA00	CATH	test	68	1040	3.716	3.573	1.3396	1.2888	1.0709	1.0618	1.0381	1.045	1.0478	1.0536	1.0558	1.0567	1.0575	1.0576	1.0576
pdb|1fadA00	CATH	train	55	936	2.8235	2.8137	1.1611	1.1635	1.0183	1.0234	1.0058	1.0087	1.0083	1.0101	1.0096	1.0104	1.0097	1.0104	1.0097
pdb|1fafA00	CATH	train	35	560	1.7721	1.9557	1.0255	1.08	0.997	1.0139	1.0016	1.0049	1.0019	1.003	1.0027	1.0028	1.0028	1.0028	1.0028
pdb|1fakL01	CATH	train	21	226	1.2649	1.4761	0.9787	1.0392	0.9928	1.0033	0.9964	0.9994	0.997	0.9977	0.9968	0.9969	0.9968	0.9968	0.9968
pdb|1faoA00	CATH	test	65	482	7.9931	7.332	3.4451	2.9946	2.1485	1.8803	1.5918	1.4443	1.3193	1.2372	1.1739	1.1296	1.0961	1.0712	1.0523
pdb|1faqA00	CATH	train	25	300	1.7908	1.8344	1.0907	1.0817	1.0152	1.013	1.0081	1.0102	1.0106	1.0108	1.0108	1.0108	1.0108	1.0108	1.0108
pdb|1fasA00	CATH	train	21	274	1.0755	1.3875	0.972	1.0344	0.9927	1.0025	0.991	0.9927	0.9875	0.9869	0.9842	0.9834	0.983	0.983	0.983
pdb|1favA00	CATH	train	47	430	5.4853	4.0191	1.9175	1.5286	1.228	1.1283	1.066	1.0414	1.0275	1.0215	1.0198	1.0194	1.0198	1.021	1.022
pdb|1fbvA02	CATH	test	41	508	3.0756	2.8564	1.3277	1.2346	1.0621	1.0438	1.017	1.0147	1.0125	1.0133	1.0144	1.0148	1.0149	1.0149	1.0149
pdb|1fc3B00	CATH	train	52	648	3.3035	2.892	1.2648	1.2143	1.0495	1.0356	1.0109	1.0074	1.0022	1.0007	0.9978	0.9962	0.9948	0.9938	0.9928
pdb|1fc4A01	CATH	train	111	1094	10.8494	7.8615	3.0406	2.3803	1.6334	1.4283	1.2445	1.1706	1.1169	1.0909	1.0709	1.0631	1.0544	1.0518	1.0483
pdb|1fc4A02	CATH	train	70	1036	4.0322	3.2683	1.2761	1.2146	1.0362	1.0198	0.993	0.9844	0.9757	0.9725	0.9692	0.965	0.9598	0.9552	0.9484
pdb|1fc6A01	CATH	test	46	862	1.9261	1.9882	1.0446	1.057	1.0002	0.994	0.9838	0.9744	0.9633	0.9546	0.9426	0.9353	0.929	0.9238	0.9229
pdb|1fc6A02	CATH	train	41	824	1.5405	1.8109	0.9896	1.0581	1.0087	1.0276	1.0303	1.0384	1.0426	1.0466	1.0492	1.0503	1.0521	1.0533	1.0532
pdb|1fc6A03	CATH	train	71	1018	3.2561	2.8287	0.9746	1.3184	0.9217	1.1042	0.9706	1.0641	1.0208	1.0787	1.0594	1.0958	1.0916	1.1178	1.119
pdb|1fcdA01	CATH	train	88	1312	6.2971	4.7104	1.7612	1.4935	1.1653	1.101	1.0422	1.0252	1.0089	0.9996	0.9911	0.9851	0.9806	0.9739	0.9682
pdb|1fcdA02	CATH	test	61	1216	2.4261	2.2419	1.0375	1.1002	1.004	1.0241	1.0153	1.0247	1.0231	1.0288	1.0291	1.0317	1.0332	1.035	1.037
pdb|1fcdA03	CATH	train	27	460	1.1073	1.3711	0.965	1.0234	0.9963	1.0077	1.0043	1.0126	1.0121	1.0189	1.0188	1.0228	1.0229	1.0254	1.0255
pdb|1fcdC01	CATH	train	37	538	2.6784	2.2071	1.1616	1.1235	1.0222	1.018	1.0054	1.0051	1.0039	1.0038	1.0045	1.0043	1.0044	1.0043	1.0043
pdb|1fcdC02	CATH	train	56	710	5.3238	4.1365	1.9316	1.5899	1.2753	1.171	1.0937	1.0598	1.0363	1.0247	1.0155	1.0121	1.0091	1.0081	1.0065
pdb|1fchB00	CATH	test	137	1272	12.0847	8.8903	3.2549	2.826	1.7544	1.6322	1.3073	1.2573	1.1366	1.1137	1.0616	1.0498	1.0274	1.0231	1.0132
pdb|1fcqA00	CATH	train	154	1886	11.2871	9.2877	2.9948	2.3695	1.5222	1.3407	1.17	1.126	1.0905	1.0854	1.0829	1.0902	1.0998	1.1125	1.1247
pdb|1fcyA00	CATH	train	112	1838	5.7784	5.0874	1.5385	1.4463	1.1005	1.0926	1.0561	1.0709	1.0706	1.0745	1.0746	1.0746	1.0746	1.0746	1.0746
pdb|1fd3A00	CATH	train	18	240	1.1668	1.2589	0.9968	1.0123	0.9987	0.9994	0.9991	0.9998	0.9988	0.9998	0.9988	0.9998	0.9988	0.9998	0.9988
pdb|1fd9A02	CATH	test	56	442	7.2846	5.6698	2.7925	2.2102	1.6845	1.4625	1.3028	1.2097	1.1454	1.1038	1.0734	1.0528	1.0392	1.0287	1.0215
pdb|1fdrA02	CATH	train	69	694	4.9223	4.0588	1.5157	1.4751	1.092	1.1078	1.022	1.0306	1.0124	1.0194	1.0168	1.0223	1.021	1.025	1.0245
pdb|1fecA02	CATH	train	63	856	4.35	3.8928	1.5379	1.3518	1.099	1.0577	1.0183	1.0133	1	1.0009	0.9926	0.996	0.9904	0.9942	0.9895
pdb|1fecB01	CATH	train	112	1298	9.0215	6.6716	2.338	1.9724	1.3195	1.2422	1.0807	1.0531	0.9966	0.9762	0.9527	0.941	0.9346	0.9295	0.9285
pdb|1fepA02	CATH	test	250	2382	23.9966	22.1394	8.6632	7.5534	4.6632	4	3.0144	2.6291	2.1977	1.9654	1.751	1.6088	1.4878	1.3988	1.3229
pdb|1feuA01	CATH	train	49	840	2.4817	2.4111	1.1175	1.1087	1.0051	0.9884	0.9716	0.9635	0.9591	0.9582	0.9581	0.958	0.958	0.958	0.958
pdb|1feuA02	CATH	train	44	794	1.7658	1.8387	1.0111	1.0433	0.9901	0.985	0.9741	0.9675	0.9589	0.9545	0.9453	0.9376	0.9285	0.9229	0.9151
pdb|1fexA00	CATH	train	36	632	1.8317	1.8017	1.0142	1.0461	0.9927	0.9937	0.977	0.9728	0.9627	0.9586	0.9568	0.9555	0.9555	0.9551	0.9551
pdb|1ff4A00	CATH	test	34	628	1.5926	1.7292	0.9962	1.0483	0.9997	1.0178	1.0192	1.028	1.0323	1.036	1.0368	1.0368	1.0368	1.0368	1.0368
pdb|1ff9A01	CATH	train	74	872	5.5322	4.2569	1.7817	1.6496	1.2009	1.1884	1.0692	1.0778	1.0431	1.0552	1.0452	1.0575	1.0552	1.0632	1.0647
pdb|1ff9A02	CATH	train	89	1172	6.7756	5.1411	1.8668	1.5962	1.1829	1.1274	1.054	1.0406	1.0244	1.0201	1.0189	1.0186	1.0178	1.0175	1.0174
pdb|1ff9A03	CATH	train	51	912	2.5379	2.1963	1.0725	1.0782	0.9863	0.9823	0.9605	0.9567	0.9493	0.9493	0.9484	0.9484	0.9484	0.9484	0.9484
pdb|1fftB01	CATH	test	30	554	0.7777	1.3852	0.8449	1.0823	0.9609	1.0162	0.9974	1.0092	1.0094	1.02	1.0234	1.0315	1.0359	1.0412	1.0439
pdb|1fftC00	CATH	train	62	734	3.7948	3.1714	1.2088	1.3513	1.0149	1.0736	0.9968	1.0141	0.9924	0.9982	0.9877	0.9907	0.9842	0.9848	0.9794
pdb|1ffvB04	CATH	train	90	1066	7.8079	5.9552	2.3411	1.9106	1.3805	1.2591	1.1374	1.1034	1.0679	1.0606	1.0492	1.0499	1.0464	1.048	1.0478
pdb|1fg7A01	CATH	train	96	1416	5.4048	4.2857	1.491	1.3324	1.0675	1.0309	0.9902	0.9832	0.9796	0.9796	0.9796	0.9796	0.9796	0.9796	0.9796
pdb|1fg7A02	CATH	test	65	1216	2.9183	2.6142	1.0945	1.1104	0.9982	1.0055	0.9971	0.9998	0.9992	0.9996	0.9996	0.9997	0.9997	0.9997	0.9997
pdb|1fgjA01	CATH	train	135	1740	14.0045	10.5335	4.4372	3.3527	2.3003	1.9091	1.5987	1.4332	1.3044	1.2192	1.152	1.0998	1.0559	1.0163	0.9837
pdb|1fgjA02	CATH	train	122	2066	7.7587	6.258	2.036	1.7015	1.2216	1.1244	1.047	1.0221	1.0108	1.0043	1.0019	1.0003	1	1	1
pdb|1fguB01	CATH	train	50	1070	1.6526	1.7727	0.9329	1.0544	0.9685	0.9927	0.9651	0.9745	0.956	0.9612	0.9517	0.9534	0.9499	0.9496	0.949
pdb|1fgyA00	CATH	test	71	1282	5.1427	3.4028	1.4328	1.2345	1.0458	1.0178	0.9911	0.9848	0.9798	0.9778	0.9768	0.9755	0.9752	0.9751	0.975
pdb|1fh1A00	CATH	train	49	1170	1.6266	1.6652	0.9775	1.0471	1.0111	1.0343	1.0469	1.0629	1.074	1.0824	1.0855	1.086	1.086	1.086	1.086
pdb|1fhgA00	CATH	train	56	1300	2.8489	2.209	1.1194	1.0929	1.0277	1.0445	1.0548	1.0662	1.0733	1.076	1.0763	1.0764	1.0764	1.0764	1.0764
pdb|1fhoA00	CATH	train	60	1432	2.9429	2.3088	1.1291	1.0783	1.0105	1.0063	1.0006	1.0015	1.0016	1.0024	1.002	1.0026	1.002	1.0026	1.002
pdb|1fi2A00	CATH	test	90	1708	5.5423	3.8935	1.4297	1.3464	1.0958	1.0992	1.0666	1.0745	1.0699	1.072	1.0719	1.0727	1.0728	1.0728	1.0728
pdb|1fi4A02	CATH	train	96	2000	5.451	3.9111	1.4839	1.2869	1.0973	1.0901	1.0818	1.0861	1.0858	1.085	1.085	1.085	1.085	1.085	1.085
pdb|1fi5A00	CATH	train	51	1462	1.6626	1.6407	1.001	1.0123	0.9995	0.9992	0.9992	0.9992	0.9992	0.9992	0.9992	0.9992	0.9992	0.9992	0.9992
pdb|1fi6A00	CATH	train	47	1356	1.2843	1.4404	0.9642	1.0111	0.9837	0.9892	0.9836	0.9825	0.9818	0.9814	0.9814	0.9814	0.9814	0.9814	0.9814
pdb|1fioA00	CATH	test	118	1802	12.6547	8.4817	3.6072	2.5612	1.7905	1.4934	1.3035	1.2119	1.1552	1.1227	1.1061	1.0984	1.0945	1.0924	1.092
pdb|1fipA00	CATH	train	31	664	1.0889	1.2748	0.9639	1.0107	0.9949	0.9978	0.9949	0.9955	0.9948	0.9958	0.9956	0.9965	0.9965	1.0009	1.0036
pdb|1fiqC01	CATH	train	58	822	4.5746	3.1244	1.3994	1.2578	1.0554	1.0428	1.0113	1.0128	1.0102	1.012	1.0148	1.0171	1.0202	1.024	1.0276
pdb|1fiqC03	CATH	train	98	1196	8.5398	6.6655	2.6259	2.139	1.4935	1.3301	1.1823	1.1283	1.0898	1.0757	1.0669	1.0641	1.0623	1.0633	1.0635
pdb|1fiqC04	CATH	test	75	1276	3.9465	3.2196	1.2699	1.191	1.0421	1.0475	1.0424	1.0526	1.0605	1.0746	1.0846	1.0986	1.1078	1.116	1.1209
pdb|1fiqC05	CATH	train	45	910	1.8746	1.7768	1.024	1.0359	0.9913	0.9877	0.984	0.984	0.984	0.984	0.984	0.984	0.984	0.984	0.984
pdb|1fiuA00	CATH	train	130	1450	12.3756	8.8428	3.5095	2.6288	1.7734	1.4958	1.2853	1.1987	1.1374	1.1169	1.103	1.1044	1.1069	1.1103	1.1104
pdb|1fiwA02	CATH	train	50	1062	2.0751	1.9491	1.0445	1.0508	0.9936	0.9959	0.9831	0.9852	0.9785	0.9788	0.9756	0.9747	0.9746	0.9746	0.9746
pdb|1fj2A00	CATH	test	94	1380	5.3431	3.7271	1.3037	1.3943	1.0212	1.1001	1.0072	1.04	1.0215	1.0317	1.0267	1.0321	1.031	1.0378	1.0419
pdb|1fjdA00	CATH	train	46	1110	1.4691	1.5869	0.9714	1.0248	0.9807	0.9871	0.9801	0.9808	0.9792	0.9793	0.9793	0.9793	0.9793	0.9793	0.9793
pdb|1fjeB01	CATH	train	43	1042	1.3903	1.54	0.9669	1.0205	0.9706	0.967	0.9477	0.9399	0.9278	0.9228	0.9197	0.9196	0.9196	0.9196	0.9196
pdb|1fjeB02	CATH	train	53	1158	3.2069	2.2465	1.1941	1.1023	1.0409	1.04	1.0459	1.0585	1.0666	1.07	1.0705	1.0703	1.0703	1.0703	1.0703
pdb|1fjgM02	CATH	test	27	532	1.141	1.3056	0.9731	1.0175	0.9978	1.0029	1.0036	1.0031	1.0035	1.0031	1.0035	1.0031	1.0035	1.0031	1.0035
pdb|1fjgQ00	CATH	train	51	694	4.5505	3.1376	1.5089	1.2711	1.0941	1.0491	1.021	1.0113	1.0063	1.0044	1.0039	1.0034	1.0033	1.0033	1.0033
pdb|1fjgR00	CATH	train	48	794	3.246	2.5479	1.2469	1.1394	1.0377	1.0329	1.0297	1.0344	1.0354	1.0356	1.0356	1.0356	1.0356	1.0356	1.0356
pdb|1fjkA00	CATH	train	16	202	0.9574	1.156	0.98	1.008	0.9994	1.0007	0.9992	1.0005	0.9991	1.0004	0.9991	1.0003	0.9989	1.0001	0.9989
pdb|1fjlB00	CATH	test	35	314	4.5073	3.9716	2.2689	1.8761	1.5232	1.3568	1.2367	1.1644	1.1146	1.082	1.0599	1.0454	1.0338	1.0271	1.0212
pdb|1fjrA01	CATH	train	34	396	2.3864	2.2234	1.16	1.1194	1.0209	1.0105	0.9941	0.9881	0.9819	0.9796	0.9791	0.979	0.979	0.979	0.979
pdb|1fjrA02	CATH	train	64	634	6.5538	5.1831	2.2703	1.8112	1.367	1.221	1.116	1.068	1.0354	1.0169	1.004	0.9938	0.9867	0.9825	0.9796
pdb|1fk5A00	CATH	train	31	448	1.6926	1.9811	1.0443	1.1005	1.0042	1.0185	1.0068	1.0101	1.01	1.0103	1.0103	1.0104	1.0105	1.0105	1.0105
pdb|1fkaD01	CATH	test	35	520	2.1675	2.0661	1.1437	1.0968	1.024	1.0167	1.0093	1.0073	1.0075	1.0062	1.0028	1.0001	0.9971	0.9952	0.9927
pdb|1fl0A00	CATH	train	82	826	7.3651	5.1814	2.0893	1.7472	1.2751	1.1872	1.0751	1.0485	1.0179	1.0057	0.9915	0.9861	0.9797	0.9767	0.9743
pdb|1fl2A01	CATH	train	76	1032	4.5354	3.787	1.4734	1.3353	1.0988	1.0532	1.0084	0.9878	0.9716	0.9585	0.9483	0.9391	0.9318	0.9245	0.9144
pdb|1fl2A02	CATH	train	65	1094	3.3165	2.961	1.1986	1.1683	1.0229	1.0233	1.0029	1.0037	1.0008	1.0002	1.0003	1.002	1.0019	1.0038	1.0077
pdb|1flcB00	CATH	test	77	1330	3.891	3.3501	1.2762	1.2347	1.0401	1.0231	0.9853	0.9691	0.9523	0.9372	0.9196	0.9062	0.8904	0.8755	0.8641
pdb|1fleI00	CATH	train	27	460	1.0765	1.3246	0.9405	1.0265	0.9798	0.9975	0.9801	0.9852	0.9773	0.978	0.9768	0.9768	0.9768	0.9768	0.9768
pdb|1flmA00	CATH	train	46	590	3.7473	2.8047	1.3819	1.2324	1.0811	1.0485	1.0245	1.0167	1.0111	1.0094	1.0075	1.007	1.0062	1.0064	1.0061
pdb|1floA01	CATH	train	46	706	2.3626	2.1449	1.0789	1.0898	0.998	1.0033	0.9801	0.9821	0.9653	0.965	0.9518	0.9489	0.9419	0.9408	0.9404
pdb|1floC02	CATH	test	118	1180	12.1449	9.3137	3.7996	3.0469	2.0236	1.7398	1.4417	1.3183	1.2078	1.1488	1.0997	1.0657	1.0409	1.0181	0.9996
pdb|1fltX00	CATH	train	44	808	1.8029	1.8033	1.0085	1.0381	0.983	0.9804	0.9646	0.9571	0.9432	0.9382	0.935	0.9331	0.9328	0.9328	0.9328
pdb|1fm0E00	CATH	train	77	1064	6.2951	4.2283	1.7082	1.4128	1.1262	1.0735	1.0235	1.0164	1.0042	1.0077	1.0009	1.0067	1.0012	1.0067	1.0012
pdb|1fm2A00	CATH	train	84	1320	5.7343	4.3614	1.6411	1.3904	1.1178	1.0769	1.0439	1.0488	1.0476	1.0533	1.057	1.0591	1.06	1.0601	1.0601
pdb|1fm2B02	CATH	test	76	1462	2.8291	2.684	1.0703	1.1395	1.0169	1.0532	1.0375	1.0572	1.0546	1.0588	1.059	1.059	1.059	1.059	1.059
pdb|1fm2B03	CATH	train	32	640	1.2948	1.42	0.9949	1.0255	1.0111	1.0174	1.0193	1.0221	1.0235	1.0253	1.0261	1.0264	1.0264	1.0264	1.0264
pdb|1fm4A00	CATH	train	78	896	5.9976	4.0297	1.5674	1.5762	1.1086	1.1683	1.0417	1.0714	1.0342	1.05	1.0395	1.0492	1.0457	1.0507	1.0519
pdb|1fmbA00	CATH	train	42	756	2.0661	1.962	1.0681	1.0721	1.007	1.0062	0.9981	0.9957	0.9941	0.9927	0.9907	0.9913	0.989	0.989	0.9878
pdb|1fmjA00	CATH	test	176	1490	18.369	13.6653	5.7585	4.6486	3.0108	2.5439	2.0138	1.7894	1.568	1.4542	1.3532	1.2946	1.2433	1.2133	1.1889
pdb|1fmkA03	CATH	train	36	742	1.3089	1.4924	0.9789	1.0396	1.0081	1.0234	1.0222	1.0282	1.0277	1.0314	1.0329	1.0342	1.0351	1.0353	1.0354
pdb|1fmtA01	CATH	train	88	1042	6.8132	4.7468	1.9462	1.7656	1.2762	1.2287	1.0955	1.0761	1.0352	1.0273	1.0132	1.0097	1.0038	1.0013	1
pdb|1fmtA02	CATH	train	48	914	2.49	2.0463	1.1026	1.0653	1.0165	1.0226	1.0227	1.0246	1.0248	1.0248	1.0248	1.0248	1.0248	1.0248	1.0248
pdb|1fn9A01	CATH	test	71	1144	5.1905	3.8655	1.6166	1.3722	1.115	1.0561	1.0112	0.9942	0.9797	0.9731	0.9635	0.9576	0.9519	0.947	0.9428
pdb|1fn9A02	CATH	train	114	1600	9.6812	6.8122	2.4698	1.8852	1.3387	1.1867	1.0742	1.0213	0.9818	0.9485	0.9238	0.908	0.8975	0.8931	0.8903
pdb|1fnaA00	CATH	train	46	1048	1.6194	1.7084	0.9916	1.0301	0.9935	0.9953	0.9948	0.9948	0.9948	0.9948	0.9948	0.9948	0.9948	0.9948	0.9948
pdb|1fnfA01	CATH	train	38	914	1.2686	1.5598	0.9855	1.0262	0.9822	0.9786	0.9645	0.9571	0.95	0.9484	0.9465	0.9453	0.9452	0.9452	0.9452
pdb|1fnfA02	CATH	test	42	976	1.7613	1.5952	1.0314	1.022	0.9791	0.9723	0.9609	0.9588	0.9584	0.9584	0.9584	0.9584	0.9584	0.9584	0.9584
pdb|1fnfA03	CATH	train	40	1000	1.3594	1.4683	0.9826	1.0104	0.9862	0.9855	0.9844	0.9844	0.9844	0.9844	0.9844	0.9844	0.9844	0.9844	0.9844
pdb|1fnhA01	CATH	train	42	1038	1.6762	1.5918	1.0371	1.0482	1.0223	1.0391	1.0414	1.046	1.0464	1.0464	1.0464	1.0464	1.0464	1.0464	1.0464
pdb|1fnhA02	CATH	train	50	1140	2.5795	2.0081	1.0963	1.0534	0.9849	0.9673	0.9492	0.9382	0.9338	0.9336	0.9336	0.9336	0.9336	0.9336	0.9336
pdb|1fnhA03	CATH	test	40	1072	1.1643	1.3444	0.9837	1.0239	1.0168	1.0332	1.0378	1.0558	1.0649	1.0802	1.0875	1.0887	1.0888	1.0888	1.0888
pdb|1fnnA01	CATH	train	39	1056	1.113	1.2906	0.978	1.0089	0.9954	0.9969	0.993	0.9934	0.9923	0.993	0.9922	0.993	0.9922	0.993	0.9922
pdb|1fnnA02	CATH	train	77	1280	5.0742	3.6028	1.5469	1.4109	1.0984	1.0824	0.9984	0.9935	0.9683	0.9673	0.96	0.9595	0.9572	0.9568	0.9566
pdb|1fnnB03	CATH	train	61	1332	3.4149	2.4355	1.2043	1.0874	1.0041	0.9813	0.9697	0.9661	0.9643	0.9626	0.962	0.962	0.962	0.962	0.962
pdb|1fnoA01	CATH	test	144	1912	13.1756	8.8889	3.4959	2.6516	1.744	1.46	1.2108	1.096	1.0083	0.9563	0.9154	0.8896	0.8674	0.8528	0.846
pdb|1fo0B00	CATH	train	56	1436	1.8749	1.8062	1.0152	1.0454	1.0179	1.0313	1.0296	1.0374	1.0387	1.0404	1.0406	1.0406	1.0406	1.0406	1.0406
pdb|1fo1A01	CATH	train	29	638	1.0364	1.223	0.9791	1.0088	1.002	1.003	1.0032	1.0032	1.0032	1.0032	1.0032	1.0032	1.0032	1.0032	1.0032
pdb|1fo1B00	CATH	train	83	940	8.8265	6.3278	2.9127	2.2284	1.6598	1.4197	1.2552	1.1622	1.0968	1.0582	1.0299	1.0099	0.9944	0.9827	0.9749
pdb|1fo5A00	CATH	test	34	686	1.3426	1.424	0.981	1.03	0.9984	1.0154	1.0114	1.0181	1.0186	1.0219	1.022	1.0242	1.0248	1.0249	1.0249
pdb|1fo8A02	CATH	train	40	756	2.2153	1.8593	1.0701	1.0547	1.0003	0.9956	0.9873	0.9863	0.986	0.9858	0.9845	0.9851	0.9842	0.9849	0.9815
pdb|1fobA00	CATH	train	117	1236	10.3943	8.0964	3.1793	2.5725	1.7203	1.5015	1.2815	1.1994	1.1312	1.1027	1.0842	1.0758	1.0722	1.0726	1.0746
pdb|1foeC01	CATH	train	105	1568	7.138	5.4315	1.8926	1.5286	1.1635	1.0793	1.0085	0.9776	0.9487	0.9279	0.9087	0.8891	0.8744	0.867	0.8643
pdb|1foeC02	CATH	test	77	1438	3.4569	2.9367	1.1652	1.1539	0.9987	0.99	0.9513	0.9372	0.9123	0.8981	0.8852	0.8757	0.8711	0.8698	0.8698
pdb|1fp0A00	CATH	train	44	996	1.9159	1.8226	1.0352	1.0489	1.009	1.0205	1.0195	1.025	1.0253	1.028	1.0283	1.0285	1.0287	1.0288	1.0288
pdb|1fp1D01	CATH	train	42	998	1.269	1.4845	0.9737	1.0189	0.9827	0.9901	0.9775	0.9786	0.9739	0.973	0.9722	0.9719	0.9719	0.9719	0.9719
pdb|1fp1D02	CATH	train	112	1418	10.0348	6.7559	2.6863	2.1099	1.4952	1.3277	1.1839	1.1261	1.0857	1.0616	1.0501	1.0413	1.0369	1.0341	1.0324
pdb|1fp2A01	CATH	test	40	976	1.2761	1.3903	0.9849	1.0119	0.9952	0.9989	0.9966	0.9987	0.9968	0.999	0.9968	0.999	0.9968	0.999	0.9968
pdb|1fp2A02	CATH	train	105	1386	9.7454	6.9702	2.8488	2.1682	1.5218	1.3184	1.166	1.0979	1.054	1.0276	1.0125	1.0039	0.9987	0.9954	0.9936
pdb|1fp3A00	CATH	train	191	2190	16.8669	12.1437	4.2099	3.2317	1.9815	1.6621	1.3443	1.2257	1.1206	1.0697	1.0272	1.0023	0.9854	0.9756	0.9678
pdb|1fp5A01	CATH	train	54	1224	2.4596	2.0973	1.1001	1.0625	1.0001	0.9904	0.9757	0.9687	0.9575	0.9459	0.9357	0.9301	0.9232	0.9227	0.9235
pdb|1fp5A02	CATH	test	51	1248	1.8647	1.7315	1.0256	1.032	1.0108	1.0188	1.0186	1.022	1.019	1.0221	1.019	1.0221	1.019	1.0221	1.019
pdb|1fpoA01	CATH	train	32	762	0.9932	1.2608	0.9666	1.0166	1.0031	1.0137	1.0148	1.0195	1.0201	1.0232	1.0235	1.0247	1.025	1.0256	1.0259
pdb|1fpoA02	CATH	train	55	922	4.7454	3.2489	1.6054	1.3174	1.1183	1.0581	1.0161	1.0043	0.9926	0.9908	0.9868	0.9858	0.9865	0.9858	0.9858
pdb|1fpzC00	CATH	train	92	1256	8.0923	6.1323	2.4513	1.9316	1.392	1.2433	1.1269	1.0866	1.0568	1.049	1.0412	1.0434	1.0436	1.0445	1.0455
pdb|1fqiA01	CATH	test	33	796	1.2992	1.2791	0.9917	1.0005	0.993	0.9928	0.9928	0.9928	0.9928	0.9928	0.9928	0.9928	0.9928	0.9928	0.9928
pdb|1fqjB02	CATH	train	40	864	2.0588	1.6798	1.0576	1.0365	1.006	1.0083	1.0046	1.0085	1.0048	1.0086	1.0049	1.0086	1.0049	1.0086	1.0049
pdb|1fqjC00	CATH	train	22	374	1.0873	1.2247	0.984	1.0053	0.9981	0.9981	0.9993	0.9986	0.9998	0.9991	0.9998	0.9991	0.9998	0.9991	0.9998
pdb|1fqtA00	CATH	train	51	550	4.9034	3.7107	1.7996	1.4733	1.2056	1.1242	1.0686	1.0482	1.034	1.0307	1.0295	1.0329	1.0354	1.0373	1.04
pdb|1fr2A00	CATH	test	45	612	3.578	2.9316	1.4472	1.2543	1.0905	1.0469	1.0233	1.0152	1.0109	1.0107	1.0087	1.0098	1.0096	1.0107	1.0106
pdb|1fr3A00	CATH	train	41	648	2.2775	2.0659	1.0917	1.0721	1.0049	0.9947	0.9791	0.9725	0.967	0.9653	0.9646	0.9646	0.9646	0.9646	0.9646
pdb|1freA00	CATH	train	23	394	1.2181	1.2384	0.9944	1.0083	0.9985	1.0001	0.9987	0.9996	0.9987	0.9996	0.9987	0.9996	0.9987	0.9996	0.9987
pdb|1fs0E02	CATH	train	25	416	1.6305	1.4535	1.0702	1.0362	1.0154	1.0123	1.0132	1.0153	1.0183	1.0194	1.0194	1.0191	1.0189	1.0189	1.0189
pdb|1fs0G01	CATH	test	59	628	5.7061	4.4839	2.1004	1.7088	1.3412	1.2136	1.1227	1.0781	1.0481	1.0323	1.0217	1.0161	1.0115	1.0092	1.0083
pdb|1fs0G02	CATH	train	45	658	2.7549	2.2633	1.1349	1.107	1.0108	1.0058	0.9899	0.983	0.9776	0.9746	0.972	0.9704	0.9701	0.9701	0.97
pdb|1fs1A00	CATH	train	24	438	1.0995	1.2005	0.9928	1.0029	0.9981	0.9998	0.998	0.9988	0.9976	0.9978	0.9975	0.9974	0.9974	0.9974	0.9974
pdb|1fs1B00	CATH	train	69	700	7.4389	5.3319	2.4804	1.9133	1.4583	1.283	1.1663	1.1087	1.0706	1.0487	1.0342	1.025	1.0169	1.0124	1.0065
pdb|1fs2A00	CATH	test	121	1190	11.68	9.6538	3.8499	3.1429	2.0927	1.7985	1.4975	1.3641	1.2548	1.1887	1.1374	1.1044	1.0785	1.0601	1.0444
pdb|1fs5A00	CATH	train	120	1612	7.0892	6.1111	1.9009	1.8124	1.1711	1.2086	1.0363	1.0775	1.029	1.0601	1.0476	1.0707	1.0732	1.0955	1.1074
pdb|1fseB00	CATH	train	43	714	2.6187	2.1065	1.1348	1.0715	1.0187	1.0182	1.0181	1.025	1.03	1.0347	1.0376	1.0386	1.0387	1.0384	1.0383
pdb|1fsgA00	CATH	train	104	1120	10.6767	7.622	3.2161	2.4132	1.711	1.4473	1.2628	1.1654	1.0998	1.0593	1.0331	1.0145	1.0023	0.9958	0.9889
pdb|1fshA00	CATH	test	54	940	3.0935	2.545	1.1844	1.1237	1.0067	0.9982	0.9755	0.9757	0.9702	0.97	0.97	0.97	0.97	0.97	0.97
pdb|1fsuA01	CATH	train	157	1580	15.4048	11.235	4.2492	3.2382	2.0868	1.739	1.4418	1.3119	1.2173	1.1701	1.1366	1.1196	1.1073	1.0999	1.0945
pdb|1fsuA02	CATH	train	61	1190	3.1109	2.643	1.2128	1.1262	1.015	0.9886	0.9683	0.9589	0.9513	0.9457	0.9421	0.9393	0.9372	0.9368	0.9355
pdb|1ft5A00	CATH	train	118	1648	11.5645	7.9903	3.1583	2.307	1.6086	1.374	1.2191	1.1537	1.1152	1.0982	1.0885	1.0845	1.0816	1.0806	1.0796
pdb|1ft8A01	CATH	test	26	480	1.1138	1.2414	0.994	1.0112	1.0011	1.0036	1.0034	1.0046	1.003	1.0027	1.0007	0.9991	0.9982	0.9982	0.9981
pdb|1ft8E00	CATH	train	25	476	0.9545	1.1831	0.9747	1.008	0.9978	1.0006	1.0008	1.0008	1.0008	1.0008	1.0008	1.0008	1.0008	1.0008	1.0008
pdb|1ft9A01	CATH	train	55	646	4.2078	3.1196	1.3791	1.3569	1.0622	1.089	1.0197	1.0347	1.02	1.0294	1.0267	1.0354	1.036	1.0437	1.0486
pdb|1ft9A02	CATH	train	37	608	2.2374	1.9735	1.1596	1.0913	1.0248	1.0112	1.0016	0.9983	0.9965	0.9966	0.9959	0.9963	0.9958	0.9963	0.9958
pdb|1ftpA00	CATH	test	67	834	6.2823	4.6472	2.0999	1.6447	1.2933	1.1696	1.094	1.0594	1.0399	1.0298	1.025	1.0238	1.0242	1.024	1.0244
pdb|1ftrA01	CATH	train	67	1048	4.2716	3.4696	1.4361	1.2488	1.0633	1.0255	0.999	0.9878	0.9816	0.9782	0.9756	0.9745	0.9718	0.9719	0.9702
pdb|1ftrA02	CATH	train	58	1076	2.3419	2.3336	1.0722	1.1073	1.0118	1.0276	1.0219	1.0313	1.0332	1.0382	1.0416	1.0437	1.048	1.0518	1.0588
pdb|1ftsA01	CATH	train	42	864	1.8351	1.7336	1.0282	1.0357	1.0005	1.0039	1.0011	1.0034	1.0025	1.0036	1.0025	1.0036	1.0025	1.0036	1.0025
pdb|1fu1A02	CATH	test	43	930	2.1956	1.8471	1.1056	1.0526	1.0116	1.0011	0.9967	0.9944	0.994	0.9939	0.9939	0.9939	0.9939	0.9939	0.9939
pdb|1fuiA01	CATH	train	75	1156	5.7682	4.0273	1.7215	1.4433	1.1428	1.0805	1.0221	1.0084	0.9898	0.9863	0.9809	0.9767	0.9723	0.9677	0.9617
pdb|1fuiA02	CATH	train	70	1318	3.4462	2.8244	1.1932	1.1415	1.0125	1.0002	0.9752	0.9624	0.947	0.9362	0.9226	0.9089	0.8922	0.877	0.8673
pdb|1fuiA03	CATH	train	107	1714	7.1354	5.4251	1.956	1.6416	1.2354	1.1621	1.1001	1.0963	1.095	1.1044	1.1176	1.1306	1.1422	1.1519	1.1576
pdb|1fukA00	CATH	test	73	1660	2.9315	2.6429	1.1307	1.0841	0.9823	0.9603	0.9381	0.9277	0.9244	0.9244	0.9244	0.9244	0.9244	0.9244	0.9244
pdb|1fumA03	CATH	train	65	1630	2.2739	2.1768	1.0521	1.0738	1.021	1.0348	1.0326	1.0328	1.0328	1.0328	1.0328	1.0328	1.0328	1.0328	1.0328
pdb|1fuqA03	CATH	train	30	638	1.0689	1.2717	0.9746	1.0111	0.9873	0.9887	0.9749	0.9676	0.9584	0.9529	0.9476	0.9453	0.9445	0.9442	0.9439
pdb|1fuxA00	CATH	train	78	942	7.738	5.9164	2.5801	2.1291	1.5244	1.3722	1.211	1.1554	1.1057	1.0872	1.0711	1.0673	1.0641	1.0648	1.0646
pdb|1fv1B02	CATH	test	40	776	2.1079	1.8591	1.0754	1.0578	1.0151	1.0143	1.0154	1.0185	1.0223	1.0252	1.0266	1.0283	1.0289	1.0317	1.0332
pdb|1fvgA00	CATH	train	94	1134	9.8141	7.488	3.4978	2.681	1.9925	1.6929	1.48	1.3531	1.2638	1.2023	1.1593	1.1262	1.1028	1.0846	1.0715
pdb|1fviA01	CATH	train	41	878	1.4258	1.5082	0.9604	1.029	0.9882	0.9963	0.9815	0.9721	0.9615	0.9546	0.9471	0.9428	0.9377	0.9366	0.9334
pdb|1fviA02	CATH	train	57	1038	4.1883	2.8711	1.3521	1.1623	1.0321	0.994	0.9763	0.9694	0.9678	0.9672	0.9672	0.9672	0.9672	0.9672	0.9672
pdb|1fviA03	CATH	test	56	1144	2.7699	2.2323	1.1201	1.0856	1.0286	1.0349	1.0366	1.0432	1.0542	1.0669	1.0811	1.0927	1.0989	1.0999	1.1
pdb|1fvkA00	CATH	train	82	1394	5.3307	3.8763	1.5714	1.3653	1.0987	1.0538	1.0012	0.9849	0.9753	0.9717	0.9703	0.9699	0.9695	0.9694	0.9694
pdb|1fvqA00	CATH	train	35	848	1.1531	1.3322	0.9864	1.0099	0.9925	0.9942	0.9918	0.9932	0.9918	0.9932	0.9918	0.9932	0.9918	0.9932	0.9918
pdb|1fvrA01	CATH	train	58	1038	4.6922	3.3174	1.6154	1.3278	1.138	1.0736	1.0387	1.0214	1.01	0.9994	0.9911	0.9824	0.9769	0.9725	0.9707
pdb|1fwxA01	CATH	test	217	1952	23.2767	18.16	7.4395	5.8745	3.7355	3.0526	2.3604	2.0357	1.7515	1.5792	1.4354	1.3371	1.2577	1.2001	1.1503
pdb|1fwxA02	CATH	train	73	1368	4.544	3.2561	1.3405	1.1985	1.0578	1.0501	1.0441	1.0548	1.0668	1.0793	1.0886	1.0926	1.0928	1.0921	1.0921
pdb|1fx2A00	CATH	train	113	1798	7.881	5.2591	1.9268	1.5797	1.2131	1.1593	1.1004	1.1005	1.1016	1.117	1.1263	1.1357	1.1404	1.1461	1.149
pdb|1fx3D00	CATH	train	61	1444	2.2429	2.1081	1.0698	1.0673	1.0202	1.0289	1.0345	1.0415	1.048	1.0539	1.0599	1.0679	1.076	1.0828	1.0884
pdb|1fx7B03	CATH	test	39	996	1.0411	1.324	0.9443	1.0264	0.9893	1.0049	0.9974	1	0.9988	0.9988	0.9988	0.9988	0.9988	0.9988	0.9988
pdb|1fxjA02	CATH	train	50	1086	2.9915	2.1068	1.155	1.0737	1.0111	0.999	0.9944	0.9938	0.9937	0.9936	0.9936	0.9936	0.9936	0.9936	0.9936
pdb|1fxkA00	CATH	train	59	1230	3.9215	2.8004	1.3431	1.1889	1.0606	1.0472	1.0347	1.0348	1.034	1.0341	1.034	1.034	1.034	1.034	1.034
pdb|1fxlA01	CATH	train	33	826	1.049	1.2358	0.9727	1.007	0.9918	0.9979	0.9918	0.9934	0.9915	0.9912	0.9909	0.9909	0.9909	0.9909	0.9909
pdb|1fxlA02	CATH	test	40	882	2.0981	1.7292	1.0825	1.0384	0.9964	0.9857	0.979	0.9756	0.9747	0.9741	0.9739	0.9739	0.9739	0.9739	0.9739
pdb|1fxoA00	CATH	train	120	1362	12.5506	9.1463	3.7588	2.7747	1.8807	1.5605	1.3339	1.2263	1.1596	1.121	1.0977	1.0839	1.0764	1.0707	1.0677
pdb|1fxrA00	CATH	train	32	790	1.1329	1.1993	0.9863	1.014	1.019	1.0289	1.0297	1.0302	1.0302	1.0302	1.0302	1.0302	1.0302	1.0302	1.0302
pdb|1fy2A00	CATH	train	89	1104	5.6644	3.9166	1.3986	1.5161	1.0287	1.1624	1.0043	1.0722	1.0231	1.0616	1.0461	1.0742	1.072	1.0882	1.0951
pdb|1fycA00	CATH	test	55	1028	2.9909	2.2088	1.1246	1.0907	1.0291	1.0371	1.0417	1.0542	1.0618	1.0724	1.0807	1.096	1.1021	1.1052	1.1052
pdb|1fyhB01	CATH	train	54	1134	2.706	2.1972	1.1227	1.0832	1.0229	1.0315	1.036	1.0501	1.062	1.08	1.0901	1.0944	1.0951	1.0952	1.0952
pdb|1fyhB02	CATH	train	49	1132	1.8117	1.7911	1.0346	1.0392	0.999	1	0.9987	0.9982	0.9977	0.9976	0.9976	0.9976	0.9976	0.9976	0.9976
pdb|1fzcB03	CATH	train	31	758	1.0789	1.1989	0.9745	1.007	0.9907	0.9897	0.9869	0.985	0.985	0.9855	0.9857	0.9857	0.9857	0.9857	0.9857
pdb|1fzcC03	CATH	test	29	674	1.0216	1.1759	0.9726	1.0086	0.9962	1.0021	0.9951	1.002	0.9951	1.0018	0.995	1.0018	0.995	1.0018	0.995
pdb|1fzdA01	CATH	train	62	884	6.2984	4.63	2.1875	1.7448	1.3544	1.2181	1.1194	1.0731	1.045	1.0299	1.0201	1.0146	1.0111	1.0086	1.0074
pdb|1fzdA02	CATH	train	36	772	1.6482	1.6025	1.0377	1.0355	1.0048	1.0061	1.0031	1.0026	1.0044	1.0029	1.0041	1.0031	1.004	1.0027	1.0038
pdb|1fzgA00	CATH	train	55	930	4.8851	3.1873	1.5929	1.2988	1.1332	1.0859	1.065	1.06	1.0617	1.0624	1.0625	1.0618	1.0616	1.0612	1.0609
pdb|1fzpD00	CATH	test	64	1124	4.3053	3.1027	1.3837	1.2042	1.0601	1.0353	1.0172	1.0175	1.0141	1.0195	1.0173	1.0239	1.0242	1.0289	1.0305
pdb|1fzyA00	CATH	train	83	1386	6.0791	4.118	1.6731	1.3821	1.1398	1.0838	1.0471	1.0358	1.028	1.0259	1.0243	1.0236	1.0228	1.0226	1.0222
pdb|1g03A00	CATH	train	48	1106	1.5888	1.6796	1.008	1.0365	1.0133	1.025	1.0297	1.04	1.0437	1.0501	1.0533	1.0583	1.0644	1.0689	1.0788
pdb|1g0dA01	CATH	train	66	1284	4.0978	2.9073	1.4022	1.2211	1.0898	1.0651	1.0517	1.0522	1.0528	1.0564	1.0637	1.0671	1.0746	1.0825	1.0911
pdb|1g0dA03	CATH	test	54	1304	2.0671	1.8559	1.0403	1.0462	0.986	1.0146	0.9842	1.0132	0.9834	1.0128	0.9837	1.0129	0.9838	1.013	0.984
pdb|1g0dA04	CATH	train	45	1194	1.1665	1.3989	0.951	1.0254	0.9932	1.0111	1.0041	1.011	1.0085	1.0122	1.0093	1.0125	1.0093	1.0125	1.0093
pdb|1g0sA00	CATH	train	94	1518	7.3633	4.4368	1.8254	1.4789	1.1896	1.1345	1.0906	1.0914	1.09	1.103	1.1121	1.1244	1.1328	1.1412	1.1444
pdb|1g10A00	CATH	train	56	1368	2.5092	2.0067	1.0926	1.0429	0.9761	0.955	0.936	0.9224	0.9146	0.9102	0.9048	0.9038	0.9032	0.9032	0.9032
pdb|1g12A00	CATH	test	60	1472	2.2788	2.1411	1.0201	1.1258	1.0017	1.0489	1.0263	1.0431	1.0367	1.043	1.0426	1.0432	1.0432	1.0432	1.0432
pdb|1g1cA00	CATH	train	50	1402	1.5145	1.5454	1.0032	1.0212	1.0118	1.0157	1.0186	1.0196	1.0196	1.02	1.0196	1.02	1.0196	1.02	1.0196
pdb|1g1kA00	CATH	train	62	1520	3.0218	2.2977	1.1532	1.0854	0.9948	0.9773	0.9476	0.9248	0.9074	0.8898	0.8758	0.863	0.8592	0.8584	0.8582
pdb|1g1tA01	CATH	train	45	1356	1.12	1.3784	0.9728	1.0246	1.0072	1.018	1.0186	1.0229	1.0259	1.027	1.0263	1.026	1.0248	1.0201	1.0184
pdb|1g1tA02	CATH	test	18	270	0.8973	1.1515	0.9839	1.0092	0.9966	0.9989	0.9954	0.9957	0.9952	0.9952	0.9952	0.9952	0.9952	0.9952	0.9952
pdb|1g1xH00	CATH	train	28	332	2.5073	2.11	1.277	1.1515	1.0572	1.0295	1.0145	1.0091	1.0051	1.0042	1.0054	1.0055	1.0067	1.0082	1.0091
pdb|1g25A00	CATH	train	32	412	2.5074	2.1232	1.1918	1.1175	1.0351	1.0246	1.0183	1.0215	1.0232	1.0254	1.0256	1.0257	1.0258	1.026	1.026
pdb|1g29102	CATH	train	25	384	1.3446	1.3939	1.0145	1.0135	0.9917	0.9881	0.9802	0.979	0.9769	0.9768	0.9768	0.9768	0.9768	0.9768	0.9768
pdb|1g29103	CATH	test	30	432	1.5776	1.6087	1.0083	1.0489	0.9909	1.0016	0.9931	0.9951	0.9937	0.9936	0.9936	0.9936	0.9936	0.9936	0.9936
pdb|1g2bA00	CATH	train	30	482	1.6943	1.6744	1.0615	1.0472	1.0121	1.014	1.0135	1.0152	1.0165	1.0174	1.0183	1.0185	1.0186	1.0186	1.0186
pdb|1g2cA00	CATH	train	25	438	1.1608	1.2799	0.9972	1.0138	1.0074	1.014	1.0184	1.0258	1.0305	1.031	1.031	1.031	1.031	1.031	1.031
pdb|1g2cH00	CATH	train	19	300	0.9578	1.1205	0.9946	0.9998	0.9941	0.9941	0.9929	0.9911	0.9904	0.99	0.9895	0.9891	0.9899	0.9906	0.9909
pdb|1g2hA00	CATH	test	38	422	4.4009	3.2967	1.8641	1.4821	1.2507	1.1398	1.079	1.0433	1.0232	1.0133	1.0062	1.0018	0.9993	0.9976	0.9968
pdb|1g2nA00	CATH	train	108	870	8.4591	6.8595	2.57	2.4677	1.5717	1.524	1.237	1.2107	1.1035	1.0939	1.0544	1.05	1.033	1.0308	1.025
pdb|1g2oA00	CATH	train	103	1202	4.5681	3.8323	1.1789	1.5109	0.9631	1.1573	0.9515	1.0486	0.9501	1.003	0.9479	0.9789	0.9394	0.958	0.9348
pdb|1g2rA00	CATH	train	53	810	3.7571	3.0204	1.3629	1.2051	1.0597	1.0308	1.012	1.0086	1.0069	1.0077	1.009	1.0121	1.0142	1.0168	1.0192
pdb|1g31A00	CATH	test	59	978	3.4906	2.7943	1.2457	1.1431	1.0274	1.0046	0.9947	0.9921	0.9917	0.9916	0.9916	0.9916	0.9916	0.9916	0.9916
pdb|1g33A00	CATH	train	42	810	2.0206	1.8607	1.0709	1.045	0.9934	0.9834	0.9752	0.9744	0.9744	0.9744	0.9744	0.9744	0.9744	0.9744	0.9744
pdb|1g3gA00	CATH	train	69	1034	4.5121	3.7268	1.4341	1.4109	1.0818	1.0883	1.0118	1.0148	0.9912	0.9916	0.9851	0.986	0.9836	0.9837	0.9817
pdb|1g3iW02	CATH	train	12	118	1.0368	1.1028	0.9977	1.0019	1.0001	0.9999	1.0008	0.9998	1.0009	0.9999	1.0009	0.9999	1.0009	0.9999	1.0009
pdb|1g3jD00	CATH	test	35	236	5.575	4.9368	2.8448	2.3894	1.9164	1.6896	1.509	1.3927	1.3042	1.2375	1.1867	1.1492	1.1198	1.098	1.0809
pdb|1g3kA00	CATH	train	66	482	6.9584	6.4732	2.7796	2.4897	1.743	1.5821	1.3533	1.2698	1.1819	1.1363	1.0968	1.0742	1.0553	1.0419	1.0334
pdb|1g3nC01	CATH	train	52	572	3.0243	3.0644	1.1703	1.2538	1.0206	1.048	1.0108	1.0242	1.0178	1.0251	1.0245	1.0317	1.0358	1.0378	1.038
pdb|1g3nC02	CATH	train	54	728	3.4496	3.1682	1.311	1.2442	1.0483	1.0363	1.0068	1.0055	0.9995	1	0.997	0.9983	0.9961	0.9975	0.9959
pdb|1g3pA01	CATH	test	40	592	2.1093	2.3789	1.0797	1.1523	1.0047	1.0248	0.9993	1.0069	1.0005	1.005	1.0011	1.0041	1.0013	1.0033	1.0012
pdb|1g3pA02	CATH	train	40	676	1.9738	2.2126	1.0511	1.1084	1.0025	1.0118	0.9946	0.9955	0.9915	0.9915	0.9905	0.9898	0.9894	0.9893	0.9892
pdb|1g3qA00	CATH	train	99	1048	8.1976	6.17	2.3234	1.9946	1.374	1.262	1.1095	1.0622	1.0115	0.9887	0.9645	0.9506	0.9379	0.9261	0.9164
pdb|1g41A01	CATH	train	94	1332	5.8013	4.7045	1.7532	1.5252	1.1806	1.1118	1.0317	0.9967	0.9616	0.9408	0.9207	0.9066	0.896	0.8859	0.8788
pdb|1g41A02	CATH	test	17	186	1.2483	1.3026	0.9935	1.0168	0.9974	0.9997	0.9976	0.9975	0.9964	0.9957	0.9949	0.9939	0.9931	0.9923	0.9921
pdb|1g44C04	CATH	train	15	168	0.84	1.2107	0.9585	1.0166	0.9917	1.002	0.9967	1.0001	0.9969	0.9994	0.9967	0.9989	0.9966	0.9987	0.9966
pdb|1g47A00	CATH	train	31	252	3.0594	2.9839	1.6221	1.5563	1.2917	1.24	1.1563	1.1215	1.084	1.0629	1.0416	1.0292	1.0176	1.0105	1.0036
pdb|1g4aE02	CATH	train	27	306	2.125	1.9342	1.1556	1.0836	1.0221	1.0103	1.0042	1.0031	1.0023	1.0028	1.0027	1.003	1.0027	1.003	1.0027
pdb|1g4iA00	CATH	test	45	436	2.7408	2.937	1.1818	1.4633	1.0566	1.1613	1.0253	1.066	1.0149	1.032	1.013	1.0223	1.0151	1.019	1.0158
pdb|1g4mA01	CATH	train	83	750	8.9128	6.8542	2.8987	2.341	1.648	1.4448	1.2582	1.1689	1.1022	1.0633	1.0314	1.0103	0.9911	0.9754	0.9653
pdb|1g4mB02	CATH	train	102	1160	8.4056	6.9619	2.5366	2.0353	1.4169	1.2628	1.1259	1.0826	1.0466	1.0344	1.0247	1.0217	1.0179	1.0184	1.0144
pdb|1g4yB00	CATH	train	42	650	2.5746	2.3064	1.1576	1.0893	1.0196	1.0113	1.0078	1.0073	1.0069	1.0067	1.0067	1.0066	1.0066	1.0065	1.0065
pdb|1g4yR01	CATH	test	37	620	1.9321	1.8941	1.0776	1.0499	1.0057	0.9968	0.9896	0.9858	0.9805	0.9753	0.9686	0.9605	0.9523	0.9454	0.9423
pdb|1g55A01	CATH	train	68	850	5.95	4.7062	2.0816	1.7265	1.3543	1.2239	1.1229	1.0673	1.0264	0.9997	0.9837	0.9731	0.9667	0.9624	0.9594
pdb|1g55A02	CATH	train	82	1144	4.6263	3.7251	1.348	1.3119	1.0425	1.0381	0.977	0.9737	0.9538	0.9531	0.946	0.9471	0.9459	0.9458	0.9458
pdb|1g5bB00	CATH	train	115	1580	8.5664	6.377	2.1929	1.7647	1.2611	1.141	1.0383	0.9902	0.9543	0.9335	0.9204	0.9161	0.9136	0.9134	0.9131
pdb|1g5cA00	CATH	test	86	1640	3.915	3.4529	1.2791	1.189	1.0203	0.9855	0.9501	0.931	0.9099	0.8901	0.875	0.8687	0.8682	0.8682	0.8682
pdb|1g5hB01	CATH	train	142	2182	9.138	7.0857	2.2058	2.0216	1.2772	1.2253	1.0486	1.0214	0.9664	0.9475	0.9234	0.9085	0.8931	0.8856	0.8774
pdb|1g5hB02	CATH	train	53	1140	1.7468	1.9392	0.9743	1.0633	0.9913	1.0129	1.003	1.0098	1.0051	1.0093	1.0058	1.0093	1.0066	1.0093	1.0067
pdb|1g5mA00	CATH	train	87	1422	6.6067	4.5171	1.7222	1.4607	1.1451	1.1009	1.0516	1.0514	1.0458	1.0506	1.054	1.0556	1.0577	1.0594	1.0602
pdb|1g60B00	CATH	test	118	1864	8.9214	6.4292	2.3678	1.8269	1.3427	1.2151	1.1332	1.1088	1.1003	1.1063	1.1203	1.1351	1.1505	1.1611	1.1644
pdb|1g61A00	CATH	train	104	2102	4.7043	3.924	1.3032	1.267	1.0349	1.0505	1.024	1.036	1.0331	1.0456	1.0528	1.0609	1.0693	1.0785	1.0833
pdb|1g62A00	CATH	train	87	2098	3.0866	3.0521	1.1142	1.1347	1.0035	1.0108	0.9916	0.9906	0.9857	0.9872	0.9877	0.9889	0.9909	0.9967	1.0007
pdb|1g63A00	CATH	train	80	2090	2.4475	2.4332	1.0314	1.1021	1.0178	1.0569	1.0605	1.0928	1.1151	1.1469	1.174	1.1928	1.2095	1.2221	1.2254
pdb|1g64B00	CATH	test	88	2298	3.5382	2.8514	1.1447	1.1168	0.9982	1.0099	0.9867	0.9937	0.987	0.993	0.9952	1.0043	1.0079	1.0187	1.0268
pdb|1g66A00	CATH	train	52	1422	1.2706	1.8371	0.9289	1.0662	0.9837	1.0207	1.0138	1.0277	1.0302	1.0392	1.0447	1.0535	1.0627	1.0746	1.0861
pdb|1g6eA00	CATH	train	43	1084	1.3989	1.5872	0.9752	1.0213	0.9756	0.9729	0.9619	0.9598	0.9592	0.9592	0.9592	0.9592	0.9592	0.9592	0.9592
pdb|1g6gA00	CATH	train	50	1158	1.9865	1.8635	1.0148	1.0773	1.0108	1.0391	1.0357	1.0532	1.0529	1.0592	1.0616	1.0627	1.0641	1.0644	1.0647
pdb|1g6hA00	CATH	test	124	1604	11.8457	8.0148	3.3748	2.5124	1.7749	1.5146	1.328	1.2426	1.1883	1.1633	1.1502	1.15	1.1507	1.1515	1.1498
pdb|1g6sA01	CATH	train	88	1604	3.8189	3.0608	1.1059	1.2113	1.0081	1.0436	1.0172	1.0316	1.0323	1.0458	1.0517	1.0711	1.0823	1.1043	1.1236
pdb|1g6sA02	CATH	train	86	1812	3.5824	2.9832	1.1693	1.1496	1.025	1.0447	1.0358	1.0617	1.0666	1.0877	1.0984	1.1179	1.1314	1.148	1.1676
pdb|1g6uA00	CATH	train	26	474	1.0706	1.2502	0.9755	1.0191	1.0071	1.0178	1.0191	1.0227	1.0239	1.024	1.024	1.024	1.024	1.024	1.024
pdb|1g6xA00	CATH	test	32	518	2.267	1.8439	1.1416	1.0722	1.0169	1.0039	0.9923	0.9864	0.9832	0.9806	0.9802	0.9807	0.9809	0.9809	0.9809
pdb|1g6zA00	CATH	train	35	586	2.2874	1.8885	1.1208	1.0675	1.0205	1.0171	1.0197	1.0264	1.033	1.0401	1.0438	1.0471	1.0478	1.048	1.048
pdb|1g73A00	CATH	train	74	852	6.9787	5.2665	2.2011	1.8828	1.3826	1.2815	1.1579	1.1168	1.0813	1.0657	1.0533	1.0476	1.0449	1.0465	1.0499
pdb|1g73D00	CATH	train	61	948	4.0007	3.2536	1.4038	1.2526	1.0762	1.0453	1.0199	1.0147	1.0105	1.0099	1.0094	1.0093	1.0089	1.0092	1.0089
pdb|1g7dA00	CATH	test	56	1020	2.9234	2.524	1.1668	1.1015	1.006	0.9862	0.9686	0.9647	0.9644	0.9644	0.9644	0.9644	0.9644	0.9644	0.9644
pdb|1g7eA00	CATH	train	68	1232	4.1214	3.1017	1.3196	1.1955	1.0398	1.0124	0.9798	0.9668	0.9546	0.9468	0.9396	0.9301	0.9264	0.9214	0.9202
pdb|1g7oA01	CATH	train	38	814	1.44	1.4801	0.9995	1.0205	0.9991	1.0069	0.9998	1.0051	1.0009	1.005	1.0013	1.0048	1.0013	1.0048	1.0013
pdb|1g7oA02	CATH	train	50	922	2.6718	2.1536	1.1301	1.0922	1.0167	1.0117	1.0035	1.0033	1.002	1.0026	1.0028	1.0028	1.0028	1.0028	1.0028
pdb|1g7sA01	CATH	test	109	1334	9.1798	6.2264	2.4443	1.9629	1.4009	1.2671	1.1387	1.0985	1.0631	1.0482	1.0373	1.0316	1.0286	1.0264	1.0255
pdb|1g7sA02	CATH	train	44	994	1.6075	1.6255	0.9998	1.0256	0.9888	0.9944	0.9849	0.9865	0.9824	0.9821	0.9812	0.9808	0.9802	0.9798	0.9797
pdb|1g7sA03	CATH	train	39	934	1.236	1.3787	0.9789	1.0021	0.974	0.9736	0.9559	0.9503	0.938	0.9324	0.932	0.932	0.932	0.932	0.932
pdb|1g7sA04	CATH	train	47	1022	2.4193	1.9026	1.0799	1.0391	0.9835	0.9747	0.9597	0.957	0.954	0.954	0.954	0.954	0.954	0.954	0.954
pdb|1g86A00	CATH	test	64	1204	3.8272	2.8768	1.318	1.2236	1.0568	1.051	1.0242	1.0271	1.0221	1.0231	1.023	1.0234	1.0229	1.0235	1.0229
pdb|1g87A02	CATH	train	59	1290	2.2438	2.2332	1.0413	1.0894	0.9824	0.9828	0.9515	0.9445	0.9239	0.9162	0.9054	0.9011	0.8931	0.8927	0.892
pdb|1g8aA01	CATH	train	23	400	1.0732	1.2015	0.9849	1.0019	0.9912	0.9882	0.9863	0.9861	0.986	0.986	0.986	0.986	0.986	0.986	0.986
pdb|1g8aA02	CATH	train	86	714	8.1873	6.0483	2.4131	2.0718	1.4253	1.2997	1.1297	1.085	1.0287	1.0063	0.986	0.9757	0.9647	0.957	0.9539
pdb|1g8fA03	CATH	test	48	634	3.2102	2.8368	1.316	1.2344	1.0624	1.0395	1.005	0.9946	0.9843	0.9779	0.9721	0.9683	0.9649	0.9639	0.9627
pdb|1g8iB02	CATH	train	56	814	4.4191	3.4759	1.6178	1.3757	1.1535	1.088	1.0481	1.0289	1.0195	1.0147	1.0123	1.0108	1.0101	1.0097	1.0094
pdb|1g8kB00	CATH	train	61	998	3.3311	3.0009	1.2662	1.2165	1.0397	1.0319	1.0071	1.0059	1.0008	0.9995	0.9964	0.9943	0.9923	0.9891	0.9883
pdb|1g8lA01	CATH	train	73	1232	3.8966	3.4275	1.317	1.2366	1.0334	1.0088	0.9649	0.9522	0.9365	0.9242	0.914	0.9062	0.8942	0.882	0.8698
pdb|1g8lA02	CATH	test	20	310	0.778	1.2512	0.9266	1.0394	0.9872	1.0145	1.0031	1.0126	1.0094	1.0127	1.0127	1.0139	1.014	1.014	1.014
pdb|1g8lA03	CATH	train	36	398	3.0863	2.3846	1.256	1.1776	1.0451	1.0266	1.0058	0.9989	0.9953	0.9931	0.9917	0.9906	0.9903	0.9899	0.9898
pdb|1g8lA04	CATH	train	48	560	4.7571	3.9283	1.887	1.5767	1.2714	1.1682	1.0944	1.0588	1.0366	1.0244	1.0178	1.0126	1.0102	1.0084	1.007
pdb|1g8mA01	CATH	train	18	252	1.137	1.1858	0.9922	1.006	0.9995	1.0026	1.0043	1.0063	1.0093	1.0105	1.012	1.012	1.012	1.012	1.012
pdb|1g8mA04	CATH	test	82	588	7.4028	5.3239	2.1409	1.9978	1.3092	1.3311	1.1008	1.124	1.031	1.0486	1.0064	1.0172	0.9953	1.0037	0.9907
pdb|1g8mB02	CATH	train	70	780	5.0006	4.5067	1.7296	1.5444	1.171	1.1216	1.0489	1.0385	1.0229	1.0242	1.0223	1.0252	1.0266	1.0316	1.0336
pdb|1g8pA01	CATH	train	80	1026	3.9102	3.2598	1.0776	1.3865	0.9336	1.1218	0.965	1.0693	1.0065	1.0627	1.0364	1.0737	1.0606	1.0841	1.0783
pdb|1g8pA02	CATH	train	38	524	2.0553	1.8661	0.9745	1.0782	0.9804	1.0048	0.9845	0.9866	0.9778	0.9766	0.9725	0.9704	0.9691	0.9685	0.9682
pdb|1g8qA00	CATH	test	38	608	2.0134	1.9547	1.0663	1.0719	1.0083	1.0151	1.0116	1.0196	1.025	1.0327	1.0387	1.0452	1.0517	1.056	1.0584
pdb|1g8tA00	CATH	train	96	948	8.2797	6.2959	2.484	2.1412	1.4506	1.3346	1.1481	1.0991	1.0336	1.0093	0.9855	0.9727	0.962	0.9574	0.9536
pdb|1g9gA01	CATH	train	174	1660	14.0773	11.6055	3.9693	3.6027	2.0156	1.9377	1.4053	1.3892	1.17	1.1648	1.0648	1.0584	1.0039	0.9963	0.9651
pdb|1g9gA02	CATH	train	71	1132	4.4777	3.7413	1.4155	1.2746	1.0654	1.0492	1.0312	1.0427	1.0502	1.0598	1.0637	1.0658	1.0667	1.0671	1.0672
pdb|1g9gA03	CATH	test	32	532	1.4683	1.5176	0.9814	1.0296	0.9902	1.0001	0.9913	0.9932	0.9899	0.9904	0.9898	0.9898	0.9898	0.9898	0.9898
pdb|1g9pA00	CATH	train	16	212	0.9802	1.1135	0.9968	1.003	0.999	0.9987	0.996	0.9944	0.9932	0.9921	0.9901	0.9883	0.9871	0.9858	0.9846
pdb|1g9rA00	CATH	train	136	772	18.2801	16.2824	8.2096	7.1612	5.2655	4.6445	3.9101	3.5277	3.1544	2.9054	2.6823	2.5124	2.3619	2.2395	2.1298
pdb|1ga6A00	CATH	train	115	1062	7.615	8.4163	2.689	3.0253	1.6419	1.8097	1.286	1.3756	1.1417	1.1882	1.082	1.1064	1.0566	1.0701	1.0439
pdb|1gaiA00	CATH	test	157	1654	10.34	10.2949	3.0306	3.1604	1.7434	1.7517	1.3308	1.3061	1.1541	1.1281	1.0633	1.0411	1.0115	0.9986	0.983
pdb|1gakA00	CATH	train	71	908	5.2244	4.5773	1.6217	1.5031	1.1334	1.1	1.029	1.0155	0.9911	0.979	0.9641	0.9557	0.9485	0.9438	0.941
pdb|1gaxA01	CATH	train	144	1492	10.1589	7.9457	2.5476	2.5703	1.4634	1.5649	1.1703	1.2335	1.0609	1.0921	1.0056	1.0216	0.9726	0.9812	0.9534
pdb|1gaxA02	CATH	train	93	1462	3.8332	3.4739	1.1095	1.2956	0.9874	1.0515	0.9894	1.0084	0.9877	0.992	0.986	0.9853	0.981	0.9812	0.9779
pdb|1gaxA04	CATH	test	29	332	2.0559	1.8003	1.0643	1.072	1.0027	1.0054	0.9929	0.9944	0.9895	0.9894	0.9888	0.9888	0.9888	0.9888	0.9888
pdb|1gaxA05	CATH	train	38	430	3.0881	2.4013	1.1971	1.1533	1.0161	1.0166	0.9911	0.9883	0.9772	0.976	0.971	0.9701	0.9683	0.9683	0.9681
pdb|1gbsA00	CATH	train	83	760	9.4229	7.7648	3.5644	2.8469	2.0309	1.7416	1.4816	1.3492	1.2403	1.1735	1.1198	1.0825	1.0533	1.029	1.0075
pdb|1gccA00	CATH	train	31	448	1.7321	1.6536	1.0282	1.038	1.0034	1.0078	1.0065	1.0093	1.0106	1.0137	1.0149	1.0177	1.0185	1.0199	1.0203
pdb|1gcqC00	CATH	test	38	526	2.2226	2.0506	1.0502	1.1413	0.9925	1.0263	0.9923	1.0032	0.9933	0.9943	0.9938	0.9922	0.994	0.992	0.994
pdb|1gctA01	CATH	train	45	654	3.1151	2.8002	1.2686	1.2018	1.0483	1.0364	1.0148	1.016	1.0132	1.0157	1.0155	1.0169	1.0179	1.0181	1.0196
pdb|1gcyA01	CATH	train	167	1354	18.8531	15.4593	6.5723	5.2659	3.3805	2.8008	2.1686	1.8872	1.6205	1.4725	1.348	1.2684	1.2049	1.1595	1.1266
pdb|1gcyA02	CATH	train	16	214	0.7996	1.1462	0.9741	1.0109	0.997	1.0038	1.0028	1.0053	1.0051	1.0056	1.0056	1.0056	1.0056	1.0056	1.0056
pdb|1gd2F00	CATH	test	39	344	5.3761	4.2569	2.3382	1.86	1.485	1.3114	1.1956	1.1269	1.0823	1.054	1.0351	1.0237	1.0159	1.0106	1.0076
pdb|1gd9A02	CATH	train	93	700	9.1877	7.5622	3.0261	2.6984	1.8055	1.639	1.3747	1.2844	1.184	1.1367	1.0915	1.066	1.0445	1.0298	1.0181
pdb|1gdhA01	CATH	train	50	576	2.9949	2.8554	1.2147	1.2399	1.0449	1.0367	0.9986	0.9883	0.9744	0.9683	0.959	0.9551	0.9493	0.9446	0.943
pdb|1gdhA02	CATH	train	79	866	6.2026	5.118	1.8975	1.7313	1.2358	1.1845	1.0663	1.0479	1.0142	1.0047	0.9931	0.9912	0.987	0.9854	0.9837
pdb|1gdjA00	CATH	test	62	944	3.1602	3.0399	1.219	1.1976	1.0334	1.0251	1.0074	1.0098	1.0071	1.0101	1.0077	1.0099	1.0076	1.01	1.0076
pdb|1gdtB02	CATH	train	22	278	1.3942	1.3949	1.0175	1.02	0.9994	1.001	0.9963	0.998	0.9947	0.9971	0.995	0.9968	0.9965	0.9976	0.9975
pdb|1gdtB03	CATH	train	26	324	2.1169	1.8103	1.1287	1.0665	1.0154	1.0069	1.0009	0.9996	0.9989	0.9987	0.9986	0.9986	0.9986	0.9986	0.9986
pdb|1geeA00	CATH	train	116	804	12.487	10.6071	4.7192	4.0006	2.7628	2.3864	1.9678	1.7679	1.5824	1.4699	1.3735	1.3104	1.2543	1.2157	1.1817
pdb|1gefA00	CATH	test	64	712	4.8886	3.9493	1.571	1.4107	1.1174	1.0896	1.0379	1.0405	1.0324	1.039	1.0375	1.0428	1.0437	1.0448	1.045
pdb|1gegA00	CATH	train	103	1082	6.6484	5.4972	1.7634	1.832	1.1854	1.2339	1.0651	1.0968	1.0475	1.0691	1.0562	1.0717	1.0719	1.0814	1.087
pdb|1genA00	CATH	train	85	1258	4.1138	3.6224	1.2437	1.2595	1.0224	1.0262	0.9821	0.9848	0.9754	0.9748	0.9748	0.9748	0.9748	0.9748	0.9748
pdb|1gff200	CATH	train	64	1182	1.9747	2.2005	0.9187	1.1518	0.9684	1.0634	1.0202	1.0696	1.0525	1.0819	1.0755	1.091	1.0891	1.0971	1.097
pdb|1gg4A01	CATH	test	61	1244	2.333	2.2967	1.0425	1.0776	1.0077	1.0222	1.0197	1.0275	1.0286	1.0325	1.0342	1.0364	1.0367	1.0379	1.0386
pdb|1gg4A02	CATH	train	87	1504	4.8825	3.8596	1.4197	1.3179	1.0769	1.0691	1.0432	1.0527	1.0613	1.0778	1.0938	1.1095	1.1243	1.1377	1.1447
pdb|1gg4A03	CATH	train	48	1006	2.0739	1.898	1.0191	1.0449	0.9991	1.0121	1.0062	1.0128	1.0096	1.0137	1.0096	1.0139	1.0096	1.0139	1.0096
pdb|1ggzA01	CATH	train	41	864	1.8834	1.7844	1.0329	1.0398	1.0128	1.02	1.0206	1.0206	1.0206	1.0206	1.0206	1.0206	1.0206	1.0206	1.0206
pdb|1gh9A00	CATH	test	35	718	1.5778	1.5819	1.0295	1.0232	0.9934	0.9869	0.977	0.9654	0.9545	0.9444	0.9389	0.9368	0.9361	0.936	0.936
pdb|1gheA00	CATH	train	91	1054	9.4706	6.8276	2.8938	2.2346	1.5719	1.3627	1.1844	1.1086	1.0449	1.0107	0.9862	0.9702	0.9589	0.9513	0.9459
pdb|1ghhA00	CATH	train	44	850	2.0493	1.8009	1.0371	1.0486	0.9982	1.005	0.9991	1.0001	1.0014	1	1.0019	0.9998	1.0019	0.9998	1.0019
pdb|1ghjA00	CATH	train	39	842	1.4465	1.4732	0.9903	1.0285	0.9955	1.0113	1.0039	1.0123	1.0134	1.0153	1.0181	1.0191	1.0193	1.0197	1.0196
pdb|1ghpA00	CATH	test	129	1348	14.3316	10.7866	4.7475	3.5877	2.461	2.0158	1.662	1.46	1.3114	1.2076	1.1286	1.0695	1.0223	0.9879	0.9627
pdb|1giqA01	CATH	train	125	1770	8.8614	7.0505	2.3937	1.8802	1.3259	1.181	1.0624	1.006	0.9595	0.9199	0.8909	0.8731	0.8609	0.8549	0.8536
pdb|1gj7B02	CATH	train	54	1082	2.5004	2.1415	1.0725	1.08	1.0085	1.0082	1.0039	1.0066	1.0073	1.0079	1.0084	1.0087	1.0085	1.0087	1.0085
pdb|1gjjA00	CATH	train	48	1086	1.9406	1.8249	1.0506	1.0432	1.0043	1.0057	1.0037	1.0066	1.0103	1.0143	1.0219	1.0289	1.0367	1.042	1.0472
pdb|1gjwA01	CATH	test	256	2204	27.0371	19.9804	8.1823	6.4655	3.937	3.3117	2.42	2.1423	1.748	1.6035	1.4143	1.3245	1.2268	1.1758	1.1218
pdb|1gjwA02	CATH	train	33	754	1.1075	1.292	0.9774	1.0015	0.9847	0.986	0.9852	0.9861	0.9845	0.9864	0.9843	0.9867	0.9846	0.9853	0.9837
pdb|1gjzA00	CATH	train	32	726	1.1451	1.2857	0.9854	1.0105	0.9904	0.9887	0.983	0.9802	0.9777	0.9776	0.9774	0.9772	0.9772	0.9772	0.9772
pdb|1gk4C00	CATH	train	45	838	3.3983	2.3136	1.2498	1.1105	1.031	1.0145	1.0105	1.0141	1.0182	1.0238	1.0305	1.0344	1.0371	1.0398	1.0412
pdb|1gk6A00	CATH	test	32	750	1.224	1.2676	0.9945	1.0109	1.0034	1.0067	1.0064	1.0075	1.0077	1.0077	1.0077	1.0077	1.0077	1.0077	1.0077
pdb|1gk8I00	CATH	train	65	946	4.3453	2.9252	1.3042	1.2424	1.0462	1.056	1.0185	1.0309	1.0227	1.0282	1.0269	1.0288	1.0289	1.029	1.029
pdb|1gk9A01	CATH	train	61	1080	3.2308	2.6499	1.1952	1.1386	1.0305	1.031	1.0197	1.0296	1.031	1.0391	1.0423	1.0494	1.0517	1.0552	1.0567
pdb|1gk9A02	CATH	train	13	144	0.8931	1.0758	0.9918	1.0015	1.0003	0.9991	0.9998	0.9991	0.9998	0.9991	0.9998	0.9991	0.9998	0.9991	0.9998
pdb|1gk9B01	CATH	test	120	638	13.9326	13.9592	6.394	6.3677	4.4118	4.2255	3.4659	3.2813	2.9124	2.7648	2.5579	2.4427	2.3095	2.2195	2.129
pdb|1gk9B02	CATH	train	35	300	3.8399	3.2752	1.6474	1.4705	1.2132	1.1473	1.0841	1.0579	1.0381	1.0295	1.0233	1.0196	1.018	1.0184	1.0184
pdb|1gk9B03	CATH	train	73	576	7.4188	6.3223	2.8071	2.3706	1.7102	1.5123	1.3163	1.2271	1.1542	1.113	1.08	1.0611	1.0439	1.035	1.0255
pdb|1gklA00	CATH	train	115	1030	8.0111	8.0779	2.6289	2.942	1.7612	1.7922	1.4123	1.3729	1.2221	1.1797	1.1135	1.0849	1.0502	1.0325	1.0145
pdb|1gkmA01	CATH	test	74	1026	3.3271	3.2666	1.1423	1.2784	1.0009	1.0471	0.9723	0.9845	0.9609	0.965	0.9544	0.9566	0.9514	0.9523	0.9511
pdb|1gkmA02	CATH	train	124	1446	6.7628	5.5612	1.5465	2.0846	1.1092	1.4605	1.0434	1.2313	1.0203	1.1159	1.0061	1.055	0.9968	1.0235	0.9876
pdb|1gknA02	CATH	train	20	222	1.203	1.4209	0.9705	1.0419	0.9905	1.006	0.9969	1.0002	0.9971	0.9973	0.9968	0.9968	0.9968	0.9968	0.9968
pdb|1gkpA01	CATH	train	45	380	5.0772	3.9573	1.8994	1.5773	1.2632	1.1604	1.0877	1.0569	1.0371	1.0296	1.0266	1.0266	1.0265	1.0277	1.0297
pdb|1gkpB01	CATH	test	72	656	7.5071	6.0761	2.5343	2.0694	1.4851	1.3224	1.177	1.1179	1.078	1.0602	1.0487	1.0442	1.0411	1.0404	1.0411
pdb|1gkpB02	CATH	train	146	1266	13.9218	11.8125	4.4133	3.5967	2.2265	1.8826	1.4957	1.3427	1.2033	1.1268	1.0659	1.0271	0.9911	0.9687	0.953
pdb|1gkrA01	CATH	train	41	528	2.0912	2.0452	1.0261	1.0898	0.9981	1.0179	1.0096	1.0197	1.0223	1.0289	1.0315	1.0398	1.045	1.0493	1.0532
pdb|1gkrB01	CATH	train	65	734	5.047	3.6334	1.4871	1.3385	1.0917	1.0692	1.03	1.0284	1.0232	1.0281	1.0314	1.0394	1.0455	1.0541	1.0625
pdb|1gkrB02	CATH	test	135	1260	10.9867	8.3923	2.982	2.6007	1.6417	1.5197	1.2496	1.2041	1.1157	1.1021	1.0712	1.0668	1.0551	1.0563	1.0547
pdb|1gkuB08	CATH	train	70	1090	4.3049	3.6729	1.422	1.2768	1.0716	1.0436	1.0089	0.9973	0.9845	0.9738	0.959	0.9451	0.9347	0.9282	0.9259
pdb|1gkzA01	CATH	train	82	1338	3.8419	3.5267	1.2486	1.2734	1.0259	1.0202	0.963	0.9546	0.9302	0.9258	0.9092	0.9066	0.9013	0.901	0.901
pdb|1gkzA02	CATH	train	73	1474	3.0496	2.9466	1.1619	1.1473	1.0321	1.0436	1.0406	1.0492	1.0556	1.063	1.0702	1.0777	1.0826	1.0911	1.0954
pdb|1gl2A00	CATH	test	38	692	1.9809	1.9139	1.0506	1.0651	1.0115	1.018	1.0178	1.0184	1.0184	1.0184	1.0184	1.0184	1.0184	1.0184	1.0184
pdb|1gl2B00	CATH	train	41	766	2.2309	1.9314	1.0952	1.061	1.0061	0.9981	0.9955	0.9956	0.9959	0.9959	0.9959	0.9959	0.9959	0.9959	0.9959
pdb|1gl2C00	CATH	train	39	818	1.506	1.5641	1.0046	1.022	0.989	0.9862	0.984	0.984	0.984	0.984	0.984	0.984	0.984	0.984	0.984
pdb|1gl2D00	CATH	train	36	774	1.5029	1.5171	1.0022	1.0242	1.0089	1.0142	1.016	1.0179	1.0185	1.0188	1.0189	1.0189	1.0189	1.0189	1.0189
pdb|1gl4B00	CATH	test	43	850	2.2206	1.8682	1.0574	1.0493	0.987	0.9851	0.9708	0.9692	0.9677	0.9676	0.9676	0.9676	0.9676	0.9676	0.9676
pdb|1glbG01	CATH	train	112	1280	9.1673	6.5161	2.278	2.1519	1.3917	1.3569	1.1476	1.1239	1.0545	1.0384	1.0157	1.0071	0.9946	0.9904	0.9878
pdb|1gleG02	CATH	train	89	1392	5.0858	3.9602	1.4529	1.337	1.0837	1.0833	1.0585	1.0662	1.0677	1.0766	1.086	1.0975	1.1058	1.1089	1.109
pdb|1gmeA00	CATH	train	75	1436	3.3689	2.7676	1.1555	1.1364	1.0024	0.9928	0.9541	0.9432	0.9197	0.9029	0.8833	0.8709	0.8607	0.8516	0.8477
pdb|1gmeD00	CATH	test	59	1328	2.6667	2.3682	1.1005	1.1107	1.0184	1.0415	1.0418	1.0622	1.0734	1.0857	1.0895	1.0941	1.0953	1.0956	1.0956
pdb|1gmiA00	CATH	train	59	1446	1.9011	1.9505	1.0012	1.0505	0.9878	0.9856	0.969	0.9586	0.9395	0.9183	0.9047	0.8906	0.8758	0.8618	0.8454
pdb|1gmjB00	CATH	train	32	694	1.2989	1.3882	0.9795	1.0213	1.0036	1.0087	1.0098	1.0123	1.0135	1.0147	1.0161	1.0168	1.0172	1.0174	1.0175
pdb|1gmlA00	CATH	train	90	1048	10.4107	7.4065	3.4354	2.4862	1.7933	1.4895	1.2915	1.179	1.1043	1.0586	1.0293	1.0075	0.9925	0.981	0.9723
pdb|1gmnB01	CATH	test	30	648	1.2062	1.3102	0.9908	1.0192	1.0108	1.0203	1.0257	1.0319	1.0346	1.0358	1.0362	1.0363	1.0363	1.0363	1.0363
pdb|1gmuA01	CATH	train	39	718	2.3653	1.8208	1.0883	1.0535	0.9998	0.9988	0.9913	0.9913	0.9906	0.9906	0.9906	0.9906	0.9906	0.9906	0.9906
pdb|1gmuA02	CATH	train	35	728	1.4299	1.4392	0.9921	1.0239	1.0089	1.0183	1.0252	1.0376	1.0449	1.0558	1.0628	1.0682	1.0706	1.0712	1.0713
pdb|1gmxA00	CATH	train	54	878	3.6668	2.5899	1.2308	1.1378	1.0248	1.0076	0.9951	0.9924	0.991	0.9908	0.9908	0.9908	0.9908	0.9908	0.9908
pdb|1gmyB00	CATH	test	113	1346	10.4453	9.0007	3.9042	3.2319	2.2442	1.9144	1.5977	1.4386	1.3063	1.2261	1.1587	1.1109	1.0704	1.0394	1.0135
pdb|1gnfA00	CATH	train	25	472	1.1735	1.275	0.9829	1.0137	0.9969	1.0032	0.9987	1.0025	0.9996	1.0027	0.9997	1.0027	0.9997	1.0027	0.9997
pdb|1gnlA01	CATH	train	54	632	4.5903	3.584	1.6542	1.4522	1.1663	1.1125	1.0549	1.0382	1.0232	1.0188	1.0154	1.0137	1.0131	1.0126	1.0125
pdb|1gnlA02	CATH	train	34	554	1.6997	1.6305	1.0093	1.0368	0.9939	0.9958	0.9867	0.9822	0.9776	0.9723	0.9681	0.9649	0.9607	0.9578	0.953
pdb|1gnlA03	CATH	test	68	798	6.2065	4.9283	2.3163	1.8952	1.4522	1.3042	1.1824	1.1324	1.0933	1.077	1.0667	1.0613	1.0584	1.0563	1.0556
pdb|1gntA04	CATH	train	63	936	2.7805	2.6077	1.1154	1.1792	1.0018	1.0133	0.9751	0.9735	0.9538	0.9478	0.9338	0.9275	0.9176	0.9124	0.906
pdb|1gnwA02	CATH	train	59	1002	2.5086	2.2764	1.0157	1.1127	0.9857	1.0235	0.9983	1.0129	1.0024	1.0096	1.0032	1.0072	1.0041	1.007	1.0041
pdb|1gnyA00	CATH	train	69	1224	3.6846	3.1906	1.2565	1.2191	1.0279	1.0303	0.9999	1.003	0.9958	0.9974	0.995	0.9946	0.994	0.9938	0.9935
pdb|1go3E01	CATH	test	54	1160	2.1737	2.0426	1.0593	1.0583	1.0227	1.0368	1.0467	1.0579	1.0658	1.0703	1.0714	1.0716	1.0716	1.0716	1.0716
pdb|1go3E02	CATH	train	44	954	1.5831	1.6029	0.9786	1.0286	0.9918	0.9917	0.9786	0.9725	0.9612	0.9548	0.9503	0.9446	0.9426	0.9411	0.9407
pdb|1go3F01	CATH	train	28	560	1.1865	1.2574	0.9874	1.0097	0.9939	0.9943	0.9909	0.9898	0.9893	0.988	0.9867	0.9858	0.985	0.9839	0.9827
pdb|1go3F02	CATH	train	27	546	1.1388	1.2487	0.9931	1.0133	1.0115	1.018	1.0209	1.0218	1.022	1.022	1.022	1.022	1.022	1.022	1.022
pdb|1go4B00	CATH	test	92	926	9.6498	6.9745	3.0352	2.2943	1.6477	1.4067	1.2356	1.1446	1.0891	1.0535	1.03	1.0135	1.0045	0.9982	0.9948
pdb|1go9A00	CATH	train	23	424	1.088	1.1668	0.9952	1.0047	0.9951	0.9908	0.9866	0.9809	0.9785	0.976	0.9759	0.9758	0.9759	0.9759	0.9759
pdb|1gp0A00	CATH	train	69	700	7.0076	5.6637	2.4063	2.1756	1.4618	1.4076	1.185	1.161	1.0814	1.0703	1.0411	1.0363	1.0245	1.023	1.0174
pdb|1gp6A00	CATH	train	191	1496	20.5006	16.7143	6.7582	5.6418	3.5351	2.9833	2.2799	1.9869	1.6953	1.5316	1.3956	1.306	1.2362	1.1821	1.1444
pdb|1gp8A00	CATH	test	25	442	1.2658	1.2663	0.9999	1.0161	1.0097	1.0153	1.0213	1.0234	1.0238	1.024	1.0241	1.0241	1.0241	1.0241	1.0241
pdb|1gpeA01	CATH	train	78	732	6.3973	4.853	1.8467	1.7548	1.2435	1.2189	1.0894	1.0771	1.0407	1.0364	1.025	1.0239	1.0211	1.0197	1.0195
pdb|1gpeA02	CATH	train	28	506	1.427	1.4721	1.0077	1.0261	0.9968	0.9986	0.9961	0.996	0.996	0.996	0.996	0.996	0.996	0.996	0.996
pdb|1gpeA03	CATH	train	131	1054	14.5419	12.2154	5.5442	4.6602	3.3608	2.9116	2.4815	2.2408	2.0412	1.9023	1.7891	1.7034	1.6296	1.571	1.5227
pdb|1gpiA00	CATH	test	166	1714	8.9466	7.6939	2.29	2.7343	1.1917	1.7675	0.9367	1.4212	0.8936	1.26	0.9089	1.1867	0.9452	1.1575	0.9807
pdb|1gpjA02	CATH	train	74	1060	4.3806	3.5297	1.2989	1.3097	1.0399	1.0596	1.0057	1.0233	1.007	1.0182	1.0117	1.0189	1.0131	1.0191	1.0143
pdb|1gpjA03	CATH	train	46	730	2.995	2.3782	1.2342	1.1266	1.0338	1.0176	1.0078	1.0037	1.0029	1.0027	1.0022	1.0019	1.0018	1.001	1.001
pdb|1gpmA01	CATH	train	87	1070	7.891	5.7492	2.3826	1.8205	1.3637	1.2173	1.1225	1.0815	1.0586	1.0486	1.0432	1.0424	1.0431	1.0442	1.0479
pdb|1gppA00	CATH	test	118	1538	10.209	7.6461	2.8314	2.1205	1.4748	1.2749	1.1322	1.066	1.0147	0.9794	0.9528	0.9306	0.9096	0.8921	0.8823
pdb|1gprA00	CATH	train	73	1318	3.3653	2.9219	1.1951	1.1439	1.0096	0.9894	0.9598	0.9441	0.9297	0.9141	0.9018	0.8893	0.8749	0.8648	0.855
pdb|1gpsA00	CATH	train	20	324	1.0234	1.2012	0.9844	1.0129	1.0029	1.0107	1.01	1.0131	1.014	1.0155	1.0169	1.0177	1.0184	1.0186	1.0195
pdb|1gpzA02	CATH	train	9	70	0.9113	1.0457	1.0001	0.9998	1.0023	1.0019	1.0031	1.0038	1.0039	1.0046	1.0047	1.0047	1.0047	1.0047	1.0047
pdb|1gq6B00	CATH	test	139	654	16.9425	16.3483	7.551	7.5807	5.0687	5.0233	3.9211	3.8434	3.2598	3.1693	2.8271	2.7355	2.519	2.4338	2.2875
pdb|1gq8A00	CATH	train	124	1000	10.4508	11.325	4.2932	3.9475	2.5734	2.2878	1.8542	1.6787	1.5003	1.398	1.3068	1.2471	1.1987	1.1635	1.1328
pdb|1gqgC02	CATH	train	75	666	4.8801	5.3659	1.7818	2.1814	1.3433	1.4869	1.1934	1.2331	1.1166	1.1199	1.0667	1.0627	1.0366	1.0303	1.0148
pdb|1gqiA01	CATH	train	59	680	3.9732	4.1408	1.5779	1.6182	1.2088	1.199	1.0916	1.0744	1.0389	1.0288	1.0143	1.0052	0.996	0.9893	0.9843
pdb|1gqiA03	CATH	test	96	1026	7.8162	6.3721	2.0872	1.8971	1.2659	1.2076	1.0766	1.0609	1.033	1.0322	1.03	1.0313	1.032	1.0345	1.0365
pdb|1gqnA00	CATH	train	122	1460	8.6622	7.2075	2.1753	2.0672	1.2879	1.2541	1.0673	1.0484	0.9907	0.9813	0.9572	0.9539	0.9477	0.9474	0.9474
pdb|1gqpB00	CATH	train	89	1500	3.8603	3.953	1.1616	1.3647	0.9915	1.0528	0.9576	0.9704	0.9337	0.934	0.9135	0.9127	0.903	0.9022	0.9016
pdb|1gqvA00	CATH	train	44	642	2.3795	2.7086	1.1309	1.2182	1.0267	1.0432	1.0067	1.0161	1.0073	1.0136	1.0087	1.0139	1.0103	1.0144	1.0105
pdb|1gqyB02	CATH	test	93	960	8.6183	6.9715	2.6575	2.2523	1.5064	1.3723	1.1805	1.1323	1.0734	1.0567	1.0351	1.03	1.0216	1.0222	1.017
pdb|1gr0A01	CATH	train	114	1364	7.2818	6.0057	1.824	1.9744	1.176	1.2939	1.0547	1.1274	1.05	1.0924	1.0714	1.0959	1.0921	1.1112	1.1102
pdb|1gr0A02	CATH	train	65	1064	3.9239	3.5032	1.2427	1.2863	1.012	1.0509	1.003	1.017	1.0107	1.0122	1.0116	1.0118	1.0117	1.0118	1.0118
pdb|1griA01	CATH	train	30	372	2.1402	2.0311	1.033	1.1109	0.9881	1.0183	0.9921	0.9986	0.9895	0.9904	0.9817	0.9802	0.9762	0.9745	0.9733
pdb|1grjA01	CATH	test	48	506	4.4015	3.4993	1.6039	1.4807	1.1889	1.1472	1.0771	1.0603	1.038	1.0301	1.0184	1.0162	1.0086	1.0055	1.0018
pdb|1grjA02	CATH	train	39	548	2.5653	2.3559	1.1639	1.1312	1.0208	1.0143	1.0035	1.0036	1.0033	1.0041	1.0038	1.0042	1.0038	1.0042	1.0038
pdb|1gs5A00	CATH	train	92	864	5.6427	4.6813	1.5404	1.8452	1.1466	1.2992	1.0633	1.1317	1.0412	1.0755	1.0412	1.0617	1.0473	1.0633	1.0567
pdb|1gs9A00	CATH	train	70	956	5.3736	4.3901	1.6715	1.4539	1.1254	1.0823	1.0188	1.0049	0.9822	0.9739	0.9547	0.9495	0.9424	0.9421	0.9401
pdb|1gsaA01	CATH	test	61	1002	2.8735	2.6348	1.0624	1.1473	0.9884	1.0175	0.9835	0.9911	0.9813	0.9843	0.9811	0.983	0.981	0.9828	0.981
pdb|1gsaA02	CATH	train	59	1106	2.3035	2.3566	0.9833	1.1113	0.9768	1.0084	0.9874	0.9965	0.992	0.9961	0.9955	0.9967	0.9969	0.9972	0.9972
pdb|1gsaA03	CATH	train	34	614	1.4022	1.5546	0.962	1.0307	0.9942	1.0019	0.9966	0.9986	0.9969	0.9973	0.9966	0.9972	0.9966	0.9971	0.9966
pdb|1gskA01	CATH	train	91	944	9.3246	7.1113	3.1874	2.515	1.7921	1.538	1.3209	1.2121	1.1332	1.0858	1.0535	1.0334	1.018	1.0093	1.0009
pdb|1gskA02	CATH	test	86	1180	5.5131	4.8182	1.6647	1.5592	1.1341	1.1177	1.0383	1.0368	1.0199	1.0227	1.0197	1.021	1.0201	1.02	1.02
pdb|1gskA03	CATH	train	70	1164	3.4979	3.2634	1.1577	1.2332	1.0101	1.0416	1.0125	1.022	1.0191	1.0214	1.0214	1.0215	1.0215	1.0215	1.0215
pdb|1gsmA01	CATH	train	45	846	1.7061	1.9244	0.9409	1.0907	0.9681	0.9989	0.9617	0.9659	0.9473	0.9451	0.9339	0.9322	0.9276	0.9268	0.9268
pdb|1gsmA02	CATH	train	43	870	1.4695	1.6921	0.9492	1.0484	0.9774	0.992	0.9724	0.9741	0.9646	0.9622	0.9552	0.9523	0.9487	0.9466	0.9453
pdb|1gsoA01	CATH	test	36	730	1.0849	1.4899	0.9167	1.0519	0.9811	1.0085	0.9926	0.9978	0.9926	0.9925	0.9924	0.9924	0.9924	0.9924	0.9924
pdb|1gsoA03	CATH	train	60	894	4.3312	3.2638	1.4925	1.3983	1.1235	1.1093	1.0343	1.0386	1.0081	1.0176	0.9998	1.0105	0.9966	1.0069	0.9949
pdb|1gsoA04	CATH	train	44	848	2.2871	1.9874	1.066	1.067	0.995	0.9909	0.9727	0.9645	0.9534	0.9427	0.9334	0.9227	0.9116	0.9069	0.9022
pdb|1gt0D00	CATH	train	42	892	1.7327	1.7136	1.0024	1.0352	0.9994	1.0095	1.0085	1.012	1.0144	1.0157	1.0166	1.016	1.0171	1.016	1.0172
pdb|1gtdB00	CATH	test	41	930	1.5328	1.6531	0.9946	1.0443	1.0119	1.0247	1.0304	1.0348	1.0402	1.0428	1.0444	1.0466	1.0472	1.0472	1.0473
pdb|1gteA01	CATH	train	48	1010	1.7252	1.8204	0.9603	1.0721	0.99	1.0162	1.0039	1.013	1.0091	1.0138	1.0121	1.0142	1.0125	1.0143	1.0125
pdb|1gteA02	CATH	train	74	1246	5.7765	4.0865	1.6796	1.3783	1.1154	1.0577	1.0136	0.9992	0.991	0.9834	0.9826	0.9766	0.9794	0.9737	0.978
pdb|1gteA03	CATH	train	102	1614	7.7836	5.4948	1.9871	1.6218	1.1792	1.1039	1.0084	0.9761	0.9422	0.9175	0.8912	0.8751	0.8607	0.8533	0.8509
pdb|1gteA04	CATH	test	63	1414	2.2494	2.1642	1.0262	1.0601	0.9701	0.9748	0.9437	0.9436	0.934	0.9342	0.9338	0.9338	0.9338	0.9338	0.9338
pdb|1gteB05	CATH	train	125	1870	9.1276	6.0021	2.0619	1.6902	1.2035	1.1196	1.0216	0.9894	0.9581	0.9428	0.9252	0.9176	0.9106	0.9069	0.9048
pdb|1gtfA00	CATH	train	39	950	1.3034	1.4315	0.969	1.0185	0.9922	0.9949	0.991	0.9924	0.99	0.9921	0.99	0.9921	0.99	0.9921	0.99
pdb|1gtkA02	CATH	train	33	720	1.0857	1.3813	0.9443	1.0272	0.9912	0.998	0.996	0.996	0.996	0.996	0.996	0.996	0.996	0.996	0.996
pdb|1gtkA03	CATH	test	41	778	2.0938	1.787	1.0385	1.0614	1.0085	1.0165	1.0117	1.0181	1.0168	1.0196	1.0213	1.0219	1.022	1.0224	1.0225
pdb|1gtmA01	CATH	train	68	976	5.0699	3.4454	1.4206	1.2975	1.0603	1.0441	1.002	0.9949	0.9822	0.982	0.9775	0.9769	0.9762	0.9762	0.9762
pdb|1gtmA02	CATH	train	101	1354	8.3051	5.8657	2.2565	1.7347	1.2816	1.1512	1.0684	1.0354	1.0171	1.0093	1.0059	1.0045	1.0038	1.0034	1.0034
pdb|1gttA01	CATH	train	93	1586	4.3161	3.4185	1.1748	1.2393	0.9897	1.0419	1.0054	1.0337	1.0275	1.0419	1.0426	1.0573	1.0653	1.0847	1.0963
pdb|1gtvA00	CATH	test	96	1846	3.0674	2.7637	0.9287	1.2154	0.9188	1.0431	0.9246	0.9864	0.9206	0.9509	0.9122	0.9273	0.9051	0.9109	0.8982
pdb|1gtzA00	CATH	train	69	1578	2.3586	2.4046	1.0057	1.0843	0.9649	0.9724	0.9392	0.9384	0.9281	0.9277	0.9276	0.9276	0.9276	0.9276	0.9276
pdb|1gu2B00	CATH	train	63	1526	2.2213	2.1341	1.0161	1.0692	1.0176	1.0419	1.0421	1.0535	1.0575	1.0619	1.0632	1.0636	1.064	1.0642	1.0643
pdb|1gu3A00	CATH	train	60	1548	1.8288	2.025	0.9714	1.0528	0.9622	0.9632	0.9336	0.9242	0.9094	0.9075	0.9068	0.9068	0.9068	0.9068	0.9068
pdb|1gu4A00	CATH	test	46	1158	1.6895	1.6705	0.9836	1.0398	1.006	1.0288	1.0344	1.041	1.0431	1.0436	1.0436	1.0436	1.0436	1.0436	1.0436
pdb|1gu7A02	CATH	train	83	1416	6.6031	4.6129	1.8959	1.5704	1.2034	1.125	1.0416	1.0142	0.9756	0.9573	0.9317	0.9146	0.8939	0.883	0.8649
pdb|1gu9C00	CATH	train	75	1548	3.2584	2.7143	1.168	1.1707	1.0391	1.0728	1.0578	1.0865	1.0878	1.0995	1.0991	1.1024	1.1024	1.1024	1.1024
pdb|1gudA01	CATH	train	56	1390	1.8256	1.778	0.9734	1.0457	0.9571	0.9687	0.9359	0.938	0.9239	0.925	0.922	0.922	0.922	0.922	0.922
pdb|1guiA00	CATH	test	79	1604	5.2562	3.8417	1.533	1.3738	1.1192	1.0904	1.0592	1.0563	1.053	1.054	1.054	1.0542	1.0545	1.0547	1.0547
pdb|1gupA02	CATH	train	57	1538	1.679	1.7839	0.9534	1.0375	0.9588	0.9665	0.9297	0.9257	0.9011	0.8921	0.8737	0.8707	0.869	0.869	0.869
pdb|1gupB01	CATH	train	81	1740	4.2729	2.8381	1.1423	1.2042	1.0194	1.0892	1.0596	1.1035	1.0991	1.1209	1.1182	1.1325	1.1322	1.1385	1.139
pdb|1guxB00	CATH	train	75	1862	3.2822	2.5113	1.125	1.0789	0.9838	0.971	0.9645	0.9639	0.9638	0.9638	0.9638	0.9638	0.9638	0.9638	0.9638
pdb|1gv2A02	CATH	test	24	382	1.2424	1.3109	0.9748	1.0127	1.0008	1.0081	1.0093	1.0114	1.0116	1.0116	1.0116	1.0116	1.0116	1.0116	1.0116
pdb|1gv9A00	CATH	train	102	794	11.2714	9.9027	4.5738	4.0034	2.7863	2.473	2.0368	1.8534	1.6525	1.5407	1.4338	1.3586	1.2961	1.2478	1.2055
pdb|1gvdA00	CATH	train	31	430	2.7579	2.0577	1.2121	1.1078	1.0361	1.0212	1.0165	1.0155	1.0154	1.0153	1.0152	1.0152	1.0152	1.0152	1.0152
pdb|1gveA00	CATH	train	143	1028	17.0627	14.79	6.7786	5.8714	4.1322	3.6083	2.9884	2.673	2.3742	2.1779	2.0044	1.8734	1.7621	1.6724	1.5948
pdb|1gvfB00	CATH	test	135	1496	9.8862	8.659	2.9652	2.5196	1.6454	1.4668	1.2608	1.1885	1.1299	1.1053	1.0841	1.0757	1.0653	1.0629	1.0585
pdb|1gvjA00	CATH	train	76	1018	4.9682	4.0663	1.4732	1.427	1.0806	1.0771	0.9992	0.9907	0.9646	0.9581	0.9479	0.9456	0.9414	0.9389	0.9378
pdb|1gvkB01	CATH	train	42	638	2.191	2.5463	1.1324	1.2286	1.0307	1.0388	0.9961	0.9908	0.9734	0.9642	0.9529	0.9465	0.9403	0.9347	0.9293
pdb|1gvkB02	CATH	train	39	666	1.668	1.9282	1.0141	1.0743	0.9947	1.0021	0.9861	0.9847	0.9769	0.9712	0.9628	0.9548	0.9477	0.9457	0.9448
pdb|1gvnA00	CATH	test	52	812	3.8727	2.9627	1.4143	1.2414	1.0845	1.0555	1.0353	1.0383	1.041	1.0458	1.0484	1.0521	1.0545	1.0566	1.0571
pdb|1gvnD00	CATH	train	139	1372	13.5645	10.5739	3.9788	3.4057	2.1145	1.8761	1.4845	1.3603	1.2144	1.1451	1.0777	1.0365	1.001	0.9788	0.9563
pdb|1gvpA00	CATH	train	45	884	1.9392	1.9406	1.0311	1.0565	0.9996	1.001	0.9914	0.9933	0.9888	0.9921	0.9883	0.9922	0.9882	0.9922	0.9882
pdb|1gvzA01	CATH	train	60	1064	3.6458	2.9889	1.2484	1.2279	1.0452	1.059	1.0366	1.0504	1.0505	1.0568	1.057	1.058	1.058	1.058	1.058
pdb|1gvzA02	CATH	test	53	1128	2.3066	2.2209	1.0808	1.104	1.011	1.0221	1.0139	1.0211	1.025	1.0377	1.0475	1.0605	1.0703	1.0765	1.0814
pdb|1gw3A00	CATH	train	27	498	1.2131	1.2955	0.9751	1.0105	0.9915	0.9939	0.9827	0.9797	0.9737	0.9707	0.9684	0.9681	0.968	0.968	0.968
pdb|1gwcA02	CATH	train	60	682	4.0897	2.9958	1.1775	1.34	0.9698	1.0907	0.9699	1.026	0.9805	1.0057	0.9875	0.9987	0.9907	0.995	0.9905
pdb|1gwmA00	CATH	train	62	876	3.7709	3.2066	1.2841	1.2707	1.0474	1.0479	1.0131	1.0132	1.0069	1.0094	1.009	1.0106	1.0097	1.0106	1.0097
pdb|1gwuA01	CATH	test	71	1124	4.12	3.5902	1.416	1.2841	1.0746	1.0417	1.0151	1.0106	1.0072	1.0074	1.0072	1.0076	1.0076	1.0079	1.0077
pdb|1gwuA02	CATH	train	63	1256	2.5555	2.5291	1.0951	1.1121	1.0178	1.0249	1.0206	1.0291	1.0322	1.0387	1.042	1.0462	1.0508	1.0588	1.0653
pdb|1gwyA00	CATH	train	69	1428	3.1462	2.9449	1.2	1.1755	1.008	0.9936	0.9519	0.9379	0.9202	0.9118	0.9024	0.9011	0.901	0.901	0.901
pdb|1gxcA00	CATH	train	53	1252	1.8243	1.9506	1.0081	1.0469	0.9957	1.0056	0.9959	1.0005	0.9943	0.9998	0.9944	0.9995	0.9949	0.9996	0.9948
pdb|1gxeA00	CATH	test	72	1452	4.7532	3.2149	1.3576	1.2055	1.0544	1.0352	1.0149	1.0161	1.0137	1.0157	1.014	1.0162	1.0142	1.0161	1.0144
pdb|1gxmB00	CATH	train	124	1908	8.4266	6.3354	2.2078	1.8687	1.3054	1.2043	1.0909	1.0604	1.0323	1.0247	1.0177	1.0169	1.0155	1.0175	1.0176
pdb|1gxqA00	CATH	train	50	1300	1.5841	1.6614	0.978	1.0276	0.9906	0.9937	0.9902	0.9904	0.9899	0.9899	0.9899	0.9899	0.9899	0.9899	0.9899
pdb|1gxrA00	CATH	train	148	1908	14.3619	10.1629	4.2478	3.0652	2.0251	1.64	1.3532	1.2139	1.1112	1.0538	1.0108	0.9847	0.9676	0.9523	0.9422
pdb|1gxtA00	CATH	test	49	1312	1.4347	1.59	0.9679	1.037	0.9877	1.007	1.0002	1.012	1.013	1.0145	1.0152	1.0155	1.014	1.0132	1.0107
pdb|1gxyA00	CATH	train	99	1668	8.15	5.5902	2.35	1.8465	1.4023	1.2745	1.1846	1.1539	1.1339	1.1325	1.1299	1.1292	1.1271	1.1251	1.1244
pdb|1gy6A00	CATH	train	55	1454	1.6681	1.7798	0.9784	1.0521	0.9808	0.9904	0.9572	0.9493	0.9231	0.9135	0.8915	0.881	0.8624	0.8548	0.8388
pdb|1gyoA00	CATH	train	57	1544	2.1708	1.8861	1.0478	1.0466	1.0012	0.9957	0.9911	0.99	0.99	0.99	0.99	0.99	0.99	0.99	0.99
pdb|1gytL01	CATH	test	87	1804	6.0704	3.8269	1.6037	1.2822	1.0958	1.0427	1.0195	1.012	1.0098	1.0092	1.0088	1.0088	1.0088	1.0088	1.0088
pdb|1gz0B02	CATH	train	76	1890	2.6748	2.2604	1.0313	1.1051	1.0099	1.0548	1.0397	1.086	1.0869	1.1259	1.1381	1.1666	1.1751	1.1886	1.1956
pdb|1gz0F01	CATH	train	42	1128	1.2101	1.3628	0.9569	1.0305	1.013	1.0278	1.0408	1.0557	1.066	1.0787	1.0814	1.0823	1.0824	1.0824	1.0824
pdb|1gz2A00	CATH	train	66	1290	4.3632	2.9173	1.3822	1.2408	1.08	1.0537	1.0268	1.0214	1.0149	1.0143	1.0116	1.0113	1.0109	1.0109	1.0109
pdb|1gz6B01	CATH	test	122	1762	11.9587	8.3126	3.3847	2.4858	1.7045	1.4286	1.2354	1.1395	1.0801	1.0467	1.0265	1.0139	1.0062	1.0023	0.9997
pdb|1gzhB01	CATH	train	43	1172	1.1015	1.4204	0.9583	1.0076	0.9739	0.9707	0.9546	0.9479	0.934	0.9257	0.9139	0.9063	0.8969	0.8884	0.8813
pdb|1h03P01	CATH	train	26	500	1.0785	1.2873	0.9785	1.0165	1.0018	1.0161	1.0148	1.0211	1.0219	1.0224	1.0224	1.0224	1.0224	1.0224	1.0224
pdb|1h03P02	CATH	train	28	516	1.4764	1.4649	1.0116	1.0279	0.9987	0.9971	0.9906	0.9838	0.977	0.9706	0.9619	0.9563	0.9544	0.9539	0.9536
pdb|1h0hB01	CATH	test	78	812	8.633	6.3083	2.8653	2.2179	1.6145	1.3918	1.2259	1.1397	1.0793	1.0457	1.02	1.0022	0.9833	0.971	0.9581
pdb|1h0hB02	CATH	train	34	612	1.732	1.6007	1.028	1.0271	0.9963	0.9955	0.992	0.9917	0.9909	0.991	0.9908	0.991	0.9908	0.991	0.9908
pdb|1h0oA00	CATH	train	129	1138	10.8456	6.9788	2.4675	2.1901	1.3761	1.3525	1.1304	1.1329	1.067	1.0715	1.0516	1.0548	1.0496	1.0535	1.0551
pdb|1h0zA00	CATH	train	34	666	1.5573	1.5488	1.0056	1.0315	1.0042	1.0102	1.0095	1.0126	1.0139	1.0159	1.0174	1.0176	1.0176	1.0176	1.0176
pdb|1h12A00	CATH	test	161	1336	17.1638	16.0178	7.2368	6.7838	4.7294	4.3643	3.6095	3.3404	2.9792	2.78	2.5725	2.4278	2.2938	2.1901	2.0963
pdb|1h16A00	CATH	train	334	2784	33.8019	29.836	11.6961	9.7075	5.9657	4.8968	3.6457	3.0721	2.5271	2.2107	1.9381	1.757	1.604	1.4995	1.4099
pdb|1h1jS00	CATH	train	26	528	1.1375	1.2475	0.979	1.0088	0.9904	0.991	0.9852	0.9834	0.9809	0.9803	0.9799	0.9798	0.9798	0.9798	0.9798
pdb|1h1lD03	CATH	train	57	712	4.8923	3.3894	1.5953	1.348	1.1355	1.0807	1.0466	1.0377	1.0367	1.0388	1.0445	1.0499	1.0524	1.0535	1.0538
pdb|1h1nA00	CATH	test	117	1176	11.2005	9.4182	3.9564	3.2611	2.2031	1.8947	1.5736	1.4305	1.3051	1.2314	1.1744	1.1364	1.1069	1.086	1.0703
pdb|1h1oA01	CATH	train	45	782	2.3521	2.0105	1.0683	1.0579	1.0027	1.0027	0.9942	0.996	0.9935	0.9948	0.9933	0.9948	0.9933	0.9948	0.9933
pdb|1h1oA02	CATH	train	38	720	1.4008	1.6117	0.9703	1.051	0.9956	1.0217	1.0119	1.022	1.0207	1.0275	1.0283	1.0304	1.0308	1.0308	1.0308
pdb|1h29B04	CATH	train	68	946	6.8247	4.7177	2.2013	1.663	1.3037	1.1594	1.072	1.0238	0.9891	0.9651	0.9472	0.937	0.9303	0.9282	0.9281
pdb|1h29D03	CATH	test	67	1138	3.4989	3.0053	1.2428	1.2121	1.0455	1.0451	1.0251	1.028	1.0262	1.0302	1.0326	1.0348	1.0362	1.0373	1.0383
pdb|1h2bA02	CATH	train	71	1364	3.6265	2.969	1.2931	1.1809	1.0556	1.0468	1.0351	1.0381	1.0369	1.0409	1.0413	1.0445	1.0455	1.0462	1.0464
pdb|1h2bB01	CATH	train	115	1814	9.3871	6.0563	2.2085	1.6495	1.2309	1.1152	1.0471	1.0233	1.0104	1.0062	1.0041	1.0032	1.0032	1.0032	1.0032
pdb|1h2eA00	CATH	train	102	2084	4.6683	3.8984	1.3473	1.3124	1.0903	1.1111	1.0937	1.1116	1.115	1.1307	1.1383	1.1436	1.1455	1.148	1.1486
pdb|1h2sA00	CATH	test	76	1892	1.6289	1.9456	0.8329	1.1436	0.9179	1.0475	0.9606	1.0248	0.9732	1.0176	0.979	1.0141	0.9818	1.0133	0.9831
pdb|1h2tC03	CATH	train	106	2220	4.2793	3.2885	1.1101	1.2961	0.9797	1.0692	0.9822	1.0198	0.9898	1.0055	0.9913	1.0026	0.9938	1.0024	0.9938
pdb|1h2uA01	CATH	train	123	2646	6.324	4.3318	1.4702	1.2564	1.0316	0.9931	0.9666	0.9613	0.9587	0.9581	0.9583	0.9583	0.9583	0.9583	0.9583
pdb|1h2vC02	CATH	train	80	2338	2.2436	2.1761	1.0213	1.0698	1.0133	1.0405	1.0527	1.0801	1.1024	1.1354	1.1637	1.1906	1.2133	1.2321	1.2515
pdb|1h2vZ00	CATH	test	50	1366	1.5236	1.6279	0.9835	1.0395	0.9951	0.9982	0.9825	0.9765	0.9658	0.9594	0.9578	0.9578	0.958	0.9581	0.9581
pdb|1h2wA02	CATH	train	177	2114	19.6742	14.0304	5.7061	4.0972	2.6276	2.0707	1.6591	1.4501	1.3024	1.218	1.1537	1.1248	1.098	1.0899	1.0736
pdb|1h30A01	CATH	train	99	1912	5.2129	3.6329	1.3752	1.2693	1.0189	0.9973	0.943	0.9301	0.9022	0.8841	0.8613	0.8444	0.8304	0.822	0.8133
pdb|1h30A02	CATH	train	85	1956	3.2204	2.6209	1.1092	1.1418	1.0375	1.0834	1.0823	1.12	1.1252	1.1522	1.1563	1.1626	1.163	1.163	1.163
pdb|1h32A01	CATH	test	85	2196	3.2835	2.8009	1.1533	1.109	1.0372	1.0415	1.041	1.041	1.041	1.041	1.041	1.041	1.041	1.041	1.041
pdb|1h32A02	CATH	train	45	1288	1.3084	1.4027	0.971	1.0156	0.9883	0.9953	0.9794	0.9802	0.9731	0.9731	0.9718	0.97	0.9697	0.969	0.9682
pdb|1h32B00	CATH	train	65	1432	3.7624	2.4059	1.149	1.0922	0.9782	0.9718	0.9412	0.9341	0.9178	0.9064	0.8888	0.879	0.8682	0.8662	0.865
pdb|1h3dA01	CATH	train	64	1552	2.979	2.2406	1.1168	1.0733	0.9902	0.9756	0.9466	0.9259	0.8994	0.8806	0.8583	0.8463	0.8287	0.8207	0.8182
pdb|1h3dA03	CATH	test	29	640	0.8897	1.2157	0.9542	1.0157	0.9798	0.9884	0.9747	0.9748	0.9654	0.9648	0.9606	0.9605	0.96	0.96	0.96
pdb|1h3fA02	CATH	train	55	792	4.2758	3.0694	1.4577	1.3115	1.0974	1.0773	1.0352	1.0438	1.0374	1.0425	1.0419	1.0439	1.044	1.044	1.044
pdb|1h3fA03	CATH	train	49	868	2.9601	2.2845	1.2034	1.1162	1.0333	1.0176	1.0036	1.0011	1.0007	1.0027	1.0034	1.0043	1.0098	1.0112	1.0123
pdb|1h3fB01	CATH	train	102	1252	8.9606	5.9477	2.3511	1.8156	1.3074	1.1779	1.0555	1.0144	0.971	0.9562	0.938	0.9331	0.9287	0.9273	0.927
pdb|1h3gA01	CATH	test	51	1010	2.1735	1.9745	1.021	1.0564	0.9811	0.9875	0.9697	0.9706	0.9681	0.968	0.968	0.968	0.968	0.968	0.968
pdb|1h3gA02	CATH	train	187	1824	19.891	15.58	6.3152	4.9136	3.0593	2.4898	1.912	1.6588	1.4349	1.3131	1.2135	1.1512	1.1038	1.072	1.0477
pdb|1h3gA03	CATH	train	48	1054	2.0295	1.8565	1.047	1.0436	1.0077	1.0104	1.0106	1.0104	1.0103	1.0102	1.0101	1.01	1.01	1.01	1.01
pdb|1h3iA01	CATH	train	60	1196	3.3125	2.6485	1.1661	1.1534	1.0102	1.0205	1.0039	1.0121	1.0063	1.0124	1.0093	1.0136	1.0098	1.0138	1.0098
pdb|1h3lA00	CATH	test	44	1056	1.5591	1.6153	1.0004	1.0149	0.9755	0.9686	0.9559	0.955	0.9548	0.9548	0.9548	0.9548	0.9548	0.9548	0.9548
pdb|1h3nA02	CATH	train	86	1326	5.5795	3.4242	1.3018	1.3389	1.021	1.1023	1.0303	1.0803	1.0637	1.0914	1.0909	1.1119	1.1133	1.1229	1.1238
pdb|1h3nA03	CATH	train	31	714	1.149	1.2355	0.985	1.0066	0.9961	0.9985	0.9963	0.9957	0.9964	0.9956	0.9964	0.9956	0.9964	0.9956	0.9964
pdb|1h3nA04	CATH	train	69	938	5.5677	4.1187	1.8115	1.6305	1.2011	1.18	1.063	1.0676	1.0332	1.041	1.0282	1.0347	1.0313	1.035	1.0358
pdb|1h3oA00	CATH	test	26	544	1.0413	1.1648	0.9925	1.0062	1.0057	1.0066	1.0069	1.0069	1.0069	1.0069	1.0069	1.0069	1.0069	1.0069	1.0069
pdb|1h3oB00	CATH	train	40	640	3.2945	2.3071	1.3277	1.1567	1.0629	1.0337	1.0227	1.0187	1.0178	1.0178	1.0178	1.0187	1.0189	1.0192	1.0193
pdb|1h3zA00	CATH	train	53	766	4.3185	3.0646	1.5066	1.2593	1.0906	1.0368	1.0023	0.9844	0.9699	0.9619	0.9497	0.9422	0.9363	0.934	0.9336
pdb|1h44A01	CATH	train	74	1010	5.7145	4.3101	1.7952	1.4774	1.1609	1.083	1.0238	1.0007	0.981	0.9727	0.9644	0.9591	0.9552	0.9529	0.9505
pdb|1h4aX01	CATH	test	43	846	2.202	1.9484	1.0918	1.0537	0.994	0.9852	0.9741	0.9704	0.9664	0.9649	0.9643	0.9633	0.962	0.9603	0.9591
pdb|1h4aX02	CATH	train	45	928	2.1835	1.9354	1.0955	1.0598	1.0152	1.0158	1.0142	1.0216	1.0231	1.0289	1.0344	1.041	1.0454	1.0478	1.0492
pdb|1h4gA00	CATH	train	95	1290	8.4897	7.1456	2.9463	2.5229	1.7522	1.5535	1.3256	1.2274	1.1436	1.0979	1.0625	1.0424	1.0256	1.0168	1.0072
pdb|1h4rA01	CATH	train	41	948	1.4297	1.5121	1.0068	1.0295	1.0167	1.0302	1.0413	1.0549	1.0599	1.065	1.0676	1.0683	1.0686	1.0686	1.0686
pdb|1h4rA02	CATH	test	58	1114	3.9483	2.8275	1.4066	1.2106	1.0823	1.0533	1.0388	1.039	1.0432	1.052	1.0623	1.0766	1.0905	1.1004	1.1038
pdb|1h4vB02	CATH	train	41	1022	1.2599	1.4144	0.9864	1.0125	1.0013	1.0091	1.0122	1.0155	1.0179	1.0198	1.0224	1.0261	1.0338	1.0438	1.0554
pdb|1h4xA00	CATH	train	56	1152	2.7337	2.1351	1.0697	1.0875	0.998	1.0118	0.9986	1.0068	1.001	1.0062	1.0014	1.0066	1.0015	1.0066	1.0015
pdb|1h54A01	CATH	train	148	1744	16.9043	11.8483	4.9752	3.6181	2.3903	1.914	1.5494	1.3536	1.2106	1.1211	1.0611	1.0165	0.9874	0.9667	0.9526
pdb|1h54A02	CATH	test	174	2456	12.3426	9.7621	3.0511	2.5362	1.5432	1.3705	1.1513	1.0872	1.0239	0.9992	0.981	0.971	0.9651	0.9611	0.9595
pdb|1h54A03	CATH	train	29	638	0.903	1.2336	0.9638	1.0138	0.9888	0.9917	0.9802	0.9803	0.9747	0.9736	0.9712	0.9692	0.9688	0.9684	0.9682
[truncated: 6,993 more rows]
